# Supplementary material for: Phylogenetic Distribution and Diversity of Bacterial Pseudo-Orthocaspases Underline Their Putative Role in Photosynthesis
Source: Front Plant Sci. 2019 Mar 14;10:293. doi: 10.3389/fpls.2019.00293 (PMC6426788; doi:10.3389/fpls.2019.00293)
Supplement: Supplementary file 2 [file Table_1.xlsx]

## Sheet: Table S1
Table S1: UniProt sequences containing a p20 domain. The table lists properties and taxonomic origin of the 21,542 UniProt sequences matching a custom Pfam-based HMM in hmmsearch with the best one domain cutoff E-value 0.0001 (see Methods). The columns contain the ID in the UniProt FASTA file ('UniProt_FASTA_ID'), the UniProt ID ('UniProt_ID'), the amino acid residues in the active site HC dyad p…
UniProt_FASTA_ID	UniProt_ID	HC_dyad	HC_dyad_status	p20_length	p10_domain	Interdomain_dist	n_p20	n_p10	Architecture	Protein_length	Metacaspase	Paracaspase	Organism	Group	Superkingdom	Kingdom	Phylum	Class	Order	Family	Genus	Species	Tax_ID
sp|Q29IM7|CASP8_DROPS	Q29IM7	HC	True	136		NA	1	0	p20[266:401]	511	No	No	Drosophila pseudoobscura pseudoobscura	Arthropoda	Eukaryota	Metazoa	Arthropoda	Insecta	Diptera	Drosophilidae	Drosophila	Drosophila pseudoobscura	46245
sp|Q92851|CASPA_HUMAN	Q92851	HC	True	136		NA	1	0	p20[284:419]	521	No	No	Homo sapiens	Chordata	Eukaryota	Metazoa	Chordata	Mammalia	Primates	Hominidae	Homo	Homo sapiens	9606
sp|O15519|CFLAR_HUMAN	O15519	RV	Pseudo	118		NA	1	0	p20[262:378]	480	No	No	Homo sapiens	Chordata	Eukaryota	Metazoa	Chordata	Mammalia	Primates	Hominidae	Homo	Homo sapiens	9606
sp|O35732|CFLAR_MOUSE	O35732	LY	Pseudo	119		NA	1	0	p20[264:382]	481	No	No	Mus musculus	Chordata	Eukaryota	Metazoa	Chordata	Mammalia	Rodentia	Muridae	Mus	Mus musculus	10090
sp|Q5RD56|CFLAR_PONAB	Q5RD56	RV	Pseudo	118		NA	1	0	p20[262:377]	480	No	No	Pongo abelii	Chordata	Eukaryota	Metazoa	Chordata	Mammalia	Primates	Hominidae	Pongo	Pongo abelii	9601
sp|Q9UDY8|MALT1_HUMAN	Q9UDY8	HC	True	132		NA	1	0	p20[343:474]	824	No	Yes	Homo sapiens	Chordata	Eukaryota	Metazoa	Chordata	Mammalia	Primates	Hominidae	Homo	Homo sapiens	9606
sp|Q2TBA3|MALT1_MOUSE	Q2TBA3	HC	True	132		NA	1	0	p20[351:482]	832	No	Yes	Mus musculus	Chordata	Eukaryota	Metazoa	Chordata	Mammalia	Rodentia	Muridae	Mus	Mus musculus	10090
sp|Q9FMG1|MCA3_ARATH	Q9FMG1	HC	True	160		NA	1	0	p20[90:249]	362	No	No	Arabidopsis thaliana	Streptophyta	Eukaryota	Viridiplantae	Streptophyta	NA	Brassicales	Brassicaceae	Arabidopsis	Arabidopsis thaliana	3702
sp|Q9GPM2|PCP_DICDI	Q9GPM2	HC	True	144		NA	1	0	p20[189:330]	406	No	No	Dictyostelium discoideum	NA	Eukaryota	NA	NA	NA	Dictyosteliales	Dictyosteliaceae	Dictyostelium	Dictyostelium discoideum	44689
sp|Q8YV57|Y2124_NOSS1	Q8YV57	HC	True	139		NA	1	0	p20[25:163]	1683	No	No	Nostoc sp. PCC 7120	Cyanobacteria	Bacteria	NA	Cyanobacteria	NA	Nostocales	Nostocaceae	Nostoc	Nostoc sp. PCC 7120	103690
tr|D1JG57|D1JG57_9ARCH	D1JG57	HC	True	182		NA	1	0	p20[56:226]	739	No	No	uncultured archaeon	NA	Archaea	NA	NA	NA	NA	NA	NA	uncultured archaeon	115547
tr|A0A151ELD6|A0A151ELD6_9EURY	A0A151ELD6	HC	True	176		NA	1	0	p20[239:364]	442	No	No	Thermoplasmatales archaeon SG8-52-1	Euryarchaeota	Archaea	NA	Euryarchaeota	Thermoplasmata	Thermoplasmatales	NA	NA	Thermoplasmatales archaeon SG8-52-1	1803816
tr|A0A151EBU8|A0A151EBU8_9EURY	A0A151EBU8	HC	True	177		NA	1	0	p20[122:298]	420	No	No	Thermoplasmatales archaeon SG8-52-1	Euryarchaeota	Archaea	NA	Euryarchaeota	Thermoplasmata	Thermoplasmatales	NA	NA	Thermoplasmatales archaeon SG8-52-1	1803816
tr|A0A2K3J497|A0A2K3J497_9EURY	A0A2K3J497	HC	True	172		NA	1	0	p20[141:312]	440	No	No	Thermoplasmata archaeon M9B1D	Euryarchaeota	Archaea	NA	Euryarchaeota	Thermoplasmata	NA	NA	NA	Thermoplasmata archaeon M9B1D	1933279
tr|A0A0Q1A241|A0A0Q1A241_9EURY	A0A0Q1A241	HC	True	157		NA	1	0	p20[23:179]	472	No	No	Methanolinea sp. SDB	Euryarchaeota	Archaea	NA	Euryarchaeota	Methanomicrobia	Methanomicrobiales	Methanoregulaceae	Methanolinea	Methanolinea sp. SDB	1735327
tr|Q64B57|Q64B57_9ARCH	Q64B57	HC	True	138		NA	1	0	p20[319:449]	737	No	No	uncultured archaeon GZfos27E7	NA	Archaea	NA	NA	NA	NA	NA	NA	uncultured archaeon GZfos27E7	285383
tr|A0A2I0N5X9|A0A2I0N5X9_9EURY	A0A2I0N5X9	HC	True	139		NA	1	0	p20[154:292]	409	No	No	Thermoplasmata archaeon HGW-Thermoplasmata-2	Euryarchaeota	Archaea	NA	Euryarchaeota	Thermoplasmata	NA	NA	NA	Thermoplasmata archaeon HGW-Thermoplasmata-2	2013853
tr|A0A2I0N668|A0A2I0N668_9EURY	A0A2I0N668	HC	True	128		NA	1	0	p20[49:176]	281	No	No	Thermoplasmata archaeon HGW-Thermoplasmata-2	Euryarchaeota	Archaea	NA	Euryarchaeota	Thermoplasmata	NA	NA	NA	Thermoplasmata archaeon HGW-Thermoplasmata-2	2013853
tr|A0A1V4USL5|A0A1V4USL5_9EURY	A0A1V4USL5	HC	True	143		NA	1	0	p20[342:484]	560	No	No	Methanosaeta sp. PtaB.Bin018	Euryarchaeota	Archaea	NA	Euryarchaeota	Methanomicrobia	Methanosarcinales	Methanosaetaceae	Methanothrix	Methanosaeta sp. PtaB.Bin018	1811684
tr|A0A151E3V3|A0A151E3V3_9EURY	A0A151E3V3	HC	True	143		NA	1	0	p20[301:442]	549	No	No	Thermoplasmatales archaeon SG8-52-2	Euryarchaeota	Archaea	NA	Euryarchaeota	Thermoplasmata	Thermoplasmatales	NA	NA	Thermoplasmatales archaeon SG8-52-2	1803817
tr|A0A1V5XMT4|A0A1V5XMT4_9EURY	A0A1V5XMT4	HC	True	143		NA	1	0	p20[9:151]	448	No	No	Euryarchaeota archaeon ADurb.Bin190	Euryarchaeota	Archaea	NA	Euryarchaeota	NA	NA	NA	NA	Euryarchaeota archaeon ADurb.Bin190	1852877
tr|A0A2K3JIC7|A0A2K3JIC7_9EURY	A0A2K3JIC7	HC	True	171		NA	1	0	p20[147:317]	443	No	No	Thermoplasmata archaeon M9B2D	Euryarchaeota	Archaea	NA	Euryarchaeota	Thermoplasmata	NA	NA	NA	Thermoplasmata archaeon M9B2D	1933280
tr|A0A2K3JHK5|A0A2K3JHK5_9EURY	A0A2K3JHK5	HC	True	174		NA	1	0	p20[140:313]	436	No	No	Thermoplasmata archaeon M9B2D	Euryarchaeota	Archaea	NA	Euryarchaeota	Thermoplasmata	NA	NA	NA	Thermoplasmata archaeon M9B2D	1933280
tr|A0A2H9QWQ0|A0A2H9QWQ0_9EURY	A0A2H9QWQ0	HC	True	121		NA	1	0	p20[339:459]	464	No	No	Euryarchaeota archaeon CG_4_9_14_3_um_filter_38_12	Euryarchaeota	Archaea	NA	Euryarchaeota	NA	NA	NA	NA	Euryarchaeota archaeon CG_4_9_14_3_um_filter_38_12	1975559
tr|A0A2H9QW89|A0A2H9QW89_9EURY	A0A2H9QW89	HC	True	148		NA	1	0	p20[605:752]	826	No	No	Euryarchaeota archaeon CG_4_9_14_3_um_filter_38_12	Euryarchaeota	Archaea	NA	Euryarchaeota	NA	NA	NA	NA	Euryarchaeota archaeon CG_4_9_14_3_um_filter_38_12	1975559
tr|A0A2H9QUE0|A0A2H9QUE0_9EURY	A0A2H9QUE0	HC	True	120		NA	1	0	p20[48:167]	167	No	No	Euryarchaeota archaeon CG_4_9_14_3_um_filter_38_12	Euryarchaeota	Archaea	NA	Euryarchaeota	NA	NA	NA	NA	Euryarchaeota archaeon CG_4_9_14_3_um_filter_38_12	1975559
tr|Q64CN1|Q64CN1_9ARCH	Q64CN1	HC	True	158		NA	1	0	p20[13:165]	452	No	No	uncultured archaeon GZfos1D1	NA	Archaea	NA	NA	NA	NA	NA	NA	uncultured archaeon GZfos1D1	286721
tr|Q64CN2|Q64CN2_9ARCH	Q64CN2	HC	True	156		NA	1	0	p20[88:243]	481	No	No	uncultured archaeon GZfos1D1	NA	Archaea	NA	NA	NA	NA	NA	NA	uncultured archaeon GZfos1D1	286721
tr|A0A1F9YNP5|A0A1F9YNP5_9EURY	A0A1F9YNP5	HC	True	143		NA	1	0	p20[231:373]	463	No	No	Euryarchaeota archaeon RBG_13_31_8	Euryarchaeota	Archaea	NA	Euryarchaeota	NA	NA	NA	NA	Euryarchaeota archaeon RBG_13_31_8	1797976
tr|A0A151EZG9|A0A151EZG9_9EURY	A0A151EZG9	HC	True	173		NA	1	0	p20[135:307]	433	No	No	Thermoplasmatales archaeon SG8-52-3	Euryarchaeota	Archaea	NA	Euryarchaeota	Thermoplasmata	Thermoplasmatales	NA	NA	Thermoplasmatales archaeon SG8-52-3	1803818
tr|A0A256XPV5|A0A256XPV5_9EURY	A0A256XPV5	HC	True	146		NA	1	0	p20[163:308]	433	No	No	Thermoplasmatales archaeon ex4572_165	Euryarchaeota	Archaea	NA	Euryarchaeota	Thermoplasmata	Thermoplasmatales	NA	NA	Thermoplasmatales archaeon ex4572_165	2012525
tr|A0A151ESN5|A0A151ESN5_9EURY	A0A151ESN5	HC	True	162		NA	1	0	p20[48:209]	306	No	No	Thermoplasmatales archaeon SG8-52-3	Euryarchaeota	Archaea	NA	Euryarchaeota	Thermoplasmata	Thermoplasmatales	NA	NA	Thermoplasmatales archaeon SG8-52-3	1803818
tr|A0A256XN38|A0A256XN38_9EURY	A0A256XN38	HC	True	121		NA	1	0	p20[87:203]	339	No	No	Thermoplasmatales archaeon ex4572_165	Euryarchaeota	Archaea	NA	Euryarchaeota	Thermoplasmata	Thermoplasmatales	NA	NA	Thermoplasmatales archaeon ex4572_165	2012525
tr|A0A1Q8A2X9|A0A1Q8A2X9_9ARCH	A0A1Q8A2X9	HC	True	136		NA	1	0	p20[175:310]	423	No	No	archaeon 13_1_20CM_2_54_9	NA	Archaea	NA	NA	NA	NA	NA	NA	archaeon 13_1_20CM_2_54_9	1805008
tr|A0A1V5AFV4|A0A1V5AFV4_9EURY	A0A1V5AFV4	HC	True	143		NA	1	0	p20[342:484]	560	No	No	Methanosaeta sp. PtaU1.Bin016	Euryarchaeota	Archaea	NA	Euryarchaeota	Methanomicrobia	Methanosarcinales	Methanosaetaceae	Methanothrix	Methanosaeta sp. PtaU1.Bin016	1811686
tr|A0A0Q0VM52|A0A0Q0VM52_9EURY	A0A0Q0VM52	HC	True	149		NA	1	0	p20[5:153]	340	No	No	Methanoculleus sp. SDB	Euryarchaeota	Archaea	NA	Euryarchaeota	Methanomicrobia	Methanomicrobiales	Methanomicrobiaceae	Methanoculleus	Methanoculleus sp. SDB	1735326
tr|A0A2H6GWB8|A0A2H6GWB8_9ARCH	A0A2H6GWB8	HC	True	144		NA	1	0	p20[2:144]	324	No	No	archaeon BMS3Abin16	NA	Archaea	NA	NA	NA	NA	NA	NA	archaeon BMS3Abin16	2005740
tr|A0A2V3J9N4|A0A2V3J9N4_9EURY	A0A2V3J9N4	HC	True	134		NA	1	0	p20[342:467]	576	No	No	ANME-1 cluster archaeon	Euryarchaeota	Archaea	NA	Euryarchaeota	Methanomicrobia	NA	NA	NA	ANME-1 cluster archaeon	2056316
tr|A0A2V3JBX0|A0A2V3JBX0_9EURY	A0A2V3JBX0	HC	True	148		NA	1	0	p20[307:452]	947	No	No	ANME-1 cluster archaeon	Euryarchaeota	Archaea	NA	Euryarchaeota	Methanomicrobia	NA	NA	NA	ANME-1 cluster archaeon	2056316
tr|A0A2H9MJ73|A0A2H9MJ73_9EURY	A0A2H9MJ73	HC	True	148		NA	1	0	p20[454:601]	675	No	No	Euryarchaeota archaeon CG01_land_8_20_14_3_00_38_12	Euryarchaeota	Archaea	NA	Euryarchaeota	NA	NA	NA	NA	Euryarchaeota archaeon CG01_land_8_20_14_3_00_38_12	1975560
tr|A0A2H9MJL9|A0A2H9MJL9_9EURY	A0A2H9MJL9	HC	True	130		NA	1	0	p20[66:190]	268	No	No	Euryarchaeota archaeon CG01_land_8_20_14_3_00_38_12	Euryarchaeota	Archaea	NA	Euryarchaeota	NA	NA	NA	NA	Euryarchaeota archaeon CG01_land_8_20_14_3_00_38_12	1975560
tr|A0A151E1X5|A0A151E1X5_9EURY	A0A151E1X5	HC	True	124		NA	1	0	p20[235:358]	441	No	No	Thermoplasmatales archaeon SM1-50	Euryarchaeota	Archaea	NA	Euryarchaeota	Thermoplasmata	Thermoplasmatales	NA	NA	Thermoplasmatales archaeon SM1-50	1803815
tr|A0A151E812|A0A151E812_9EURY	A0A151E812	HC	True	152		NA	1	0	p20[326:477]	582	No	No	Thermoplasmatales archaeon SM1-50	Euryarchaeota	Archaea	NA	Euryarchaeota	Thermoplasmata	Thermoplasmatales	NA	NA	Thermoplasmatales archaeon SM1-50	1803815
tr|A0A347AGH5|A0A347AGH5_9EURY	A0A347AGH5	HC	True	152		NA	1	0	p20[43:194]	283	No	No	Methanobacterium sp. BRmetb2	Euryarchaeota	Archaea	NA	Euryarchaeota	Methanobacteria	Methanobacteriales	Methanobacteriaceae	Methanobacterium	Methanobacterium sp. BRmetb2	2025350
tr|A0A2I0N7N2|A0A2I0N7N2_9EURY	A0A2I0N7N2	HC	True	133		NA	1	0	p20[148:280]	398	No	No	Thermoplasmata archaeon HGW-Thermoplasmata-1	Euryarchaeota	Archaea	NA	Euryarchaeota	Thermoplasmata	NA	NA	NA	Thermoplasmata archaeon HGW-Thermoplasmata-1	2013852
tr|A0A151E0L9|A0A151E0L9_9EURY	A0A151E0L9	HC	True	125		NA	1	0	p20[239:362]	442	No	No	Thermoplasmatales archaeon SG8-52-4	Euryarchaeota	Archaea	NA	Euryarchaeota	Thermoplasmata	Thermoplasmatales	NA	NA	Thermoplasmatales archaeon SG8-52-4	1803819
tr|A0A151DZA2|A0A151DZA2_9EURY	A0A151DZA2	HC	True	177		NA	1	0	p20[138:314]	436	No	No	Thermoplasmatales archaeon SG8-52-4	Euryarchaeota	Archaea	NA	Euryarchaeota	Thermoplasmata	Thermoplasmatales	NA	NA	Thermoplasmatales archaeon SG8-52-4	1803819
tr|A0A2K3J7K4|A0A2K3J7K4_9EURY	A0A2K3J7K4	HC	True	137		NA	1	0	p20[75:211]	292	No	No	Thermoplasmata archaeon M8B2D	Euryarchaeota	Archaea	NA	Euryarchaeota	Thermoplasmata	NA	NA	NA	Thermoplasmata archaeon M8B2D	1933278
tr|A0A2K3JBT0|A0A2K3JBT0_9EURY	A0A2K3JBT0	HC	True	172		NA	1	0	p20[141:312]	440	No	No	Thermoplasmata archaeon M8B2D	Euryarchaeota	Archaea	NA	Euryarchaeota	Thermoplasmata	NA	NA	NA	Thermoplasmata archaeon M8B2D	1933278
tr|A0A0F8G904|A0A0F8G904_METMZ	A0A0F8G904	HC	True	168		NA	1	0	p20[9:176]	572	No	No	Methanosarcina mazei	Euryarchaeota	Archaea	NA	Euryarchaeota	Methanomicrobia	Methanosarcinales	Methanosarcinaceae	Methanosarcina	Methanosarcina mazei	2209
tr|A0A0F8QZI3|A0A0F8QZI3_METMZ	A0A0F8QZI3	HC	True	159		NA	1	0	p20[2:151]	322	No	No	Methanosarcina mazei	Euryarchaeota	Archaea	NA	Euryarchaeota	Methanomicrobia	Methanosarcinales	Methanosarcinaceae	Methanosarcina	Methanosarcina mazei	2209
tr|A0A1Q9NF29|A0A1Q9NF29_9ARCH	A0A1Q9NF29	HC	True	165		NA	1	0	p20[4:166]	296	No	No	Candidatus Heimdallarchaeota archaeon LC_3	Candidatus Heimdallarchaeota	Archaea	NA	Candidatus Heimdallarchaeota	NA	NA	NA	NA	Candidatus Heimdallarchaeota archaeon LC_3	1841598
tr|A0A1Q9N4R2|A0A1Q9N4R2_9ARCH	A0A1Q9N4R2	HC	True	161		NA	1	0	p20[5:165]	495	No	No	Candidatus Heimdallarchaeota archaeon LC_3	Candidatus Heimdallarchaeota	Archaea	NA	Candidatus Heimdallarchaeota	NA	NA	NA	NA	Candidatus Heimdallarchaeota archaeon LC_3	1841598
tr|F3KKQ7|F3KKQ7_9ARCH	F3KKQ7	HC	True	150		NA	1	0	p20[4:147]	503	No	No	Candidatus Nitrosoarchaeum limnia SFB1	Thaumarchaeota	Archaea	NA	Thaumarchaeota	NA	Nitrosopumilales	Nitrosopumilaceae	Nitrosoarchaeum	Candidatus Nitrosoarchaeum limnia	886738
tr|A0A0E3LVZ4|A0A0E3LVZ4_METMZ	A0A0E3LVZ4	HC	True	132		NA	1	0	p20[2:133]	315	No	No	Methanosarcina mazei LYC	Euryarchaeota	Archaea	NA	Euryarchaeota	Methanomicrobia	Methanosarcinales	Methanosarcinaceae	Methanosarcina	Methanosarcina mazei	1434114
tr|A0A151EUK8|A0A151EUK8_9EURY	A0A151EUK8	HC	True	124		NA	1	0	p20[17:132]	259	No	No	Theionarchaea archaeon DG-70-1	Euryarchaeota	Archaea	NA	Euryarchaeota	Theionarchaea	NA	NA	NA	Theionarchaea archaeon DG-70-1	1803814
tr|A0A1Q9PEL6|A0A1Q9PEL6_9ARCH	A0A1Q9PEL6	HC	True	140		NA	1	0	p20[139:278]	366	No	No	Candidatus Heimdallarchaeota archaeon AB_125	Candidatus Heimdallarchaeota	Archaea	NA	Candidatus Heimdallarchaeota	NA	NA	NA	NA	Candidatus Heimdallarchaeota archaeon AB_125	1841596
tr|A0A0E3R8Y5|A0A0E3R8Y5_METMZ	A0A0E3R8Y5	HC	True	140		NA	1	0	p20[2:141]	321	No	No	Methanosarcina mazei SarPi	Euryarchaeota	Archaea	NA	Euryarchaeota	Methanomicrobia	Methanosarcinales	Methanosarcinaceae	Methanosarcina	Methanosarcina mazei	1434115
tr|A0A0S1XBM4|A0A0S1XBM4_9EURY	A0A0S1XBM4	HC	True	142		NA	1	0	p20[82:223]	311	No	No	Thermococcus barophilus	Euryarchaeota	Archaea	NA	Euryarchaeota	Thermococci	Thermococcales	Thermococcaceae	Thermococcus	Thermococcus barophilus	55802
tr|A0A0E3R432|A0A0E3R432_METBA	A0A0E3R432	HC	True	139		NA	1	0	p20[8:146]	567	No	No	Methanosarcina barkeri 227	Euryarchaeota	Archaea	NA	Euryarchaeota	Methanomicrobia	Methanosarcinales	Methanosarcinaceae	Methanosarcina	Methanosarcina barkeri	1434106
tr|A0A257A7H9|A0A257A7H9_9EURY	A0A257A7H9	HC	True	112		NA	1	0	p20[738:849]	961	No	No	Thermoplasmatales archaeon ex4484_30	Euryarchaeota	Archaea	NA	Euryarchaeota	Thermoplasmata	Thermoplasmatales	NA	NA	Thermoplasmatales archaeon ex4484_30	2012522
tr|A0A257A9T0|A0A257A9T0_9EURY	A0A257A9T0	HC	True	181		NA	1	0	p20[188:367]	393	No	No	Thermoplasmatales archaeon ex4484_30	Euryarchaeota	Archaea	NA	Euryarchaeota	Thermoplasmata	Thermoplasmatales	NA	NA	Thermoplasmatales archaeon ex4484_30	2012522
tr|E3GW32|E3GW32_METFV	E3GW32	HC	True	134		NA	1	0	p20[31:158]	518	No	No	Methanothermus fervidus DSM 2088	Euryarchaeota	Archaea	NA	Euryarchaeota	Methanobacteria	Methanobacteriales	Methanothermaceae	Methanothermus	Methanothermus fervidus	523846
tr|A0A0A7LCH3|A0A0A7LCH3_9EURY	A0A0A7LCH3	HC	True	137		NA	1	0	p20[3:137]	322	No	No	Candidatus Methanoplasma termitum	Euryarchaeota	Archaea	NA	Euryarchaeota	Thermoplasmata	Methanomassiliicoccales	Methanomassiliicoccaceae	Candidatus Methanoplasma	Candidatus Methanoplasma termitum	1577791
tr|A0A133VSQ2|A0A133VSQ2_9EURY	A0A133VSQ2	HC	True	172		NA	1	0	p20[49:213]	657	No	No	candidate divison MSBL1 archaeon SCGC-AAA385M11	Euryarchaeota	Archaea	NA	Euryarchaeota	NA	NA	NA	NA	candidate divison MSBL1 archaeon SCGC-AAA385M11	1698288
tr|A0A0F8HPX8|A0A0F8HPX8_METMZ	A0A0F8HPX8	HC	True	140		NA	1	0	p20[2:141]	321	No	No	Methanosarcina mazei	Euryarchaeota	Archaea	NA	Euryarchaeota	Methanomicrobia	Methanosarcinales	Methanosarcinaceae	Methanosarcina	Methanosarcina mazei	2209
tr|B6YX88|B6YX88_THEON	B6YX88	HC	True	146		NA	1	0	p20[83:228]	312	No	No	Thermococcus onnurineus NA1	Euryarchaeota	Archaea	NA	Euryarchaeota	Thermococci	Thermococcales	Thermococcaceae	Thermococcus	Thermococcus onnurineus	523850
tr|R9TA86|R9TA86_METII	R9TA86	HC	True	130		NA	1	0	p20[2:131]	323	No	No	Candidatus Methanomassiliicoccus intestinalis Issoire-Mx1	Euryarchaeota	Archaea	NA	Euryarchaeota	Thermoplasmata	Methanomassiliicoccales	Methanomassiliicoccaceae	Methanomassiliicoccus	Candidatus Methanomassiliicoccus intestinalis	1295009
tr|A0A0E3NTY9|A0A0E3NTY9_9EURY	A0A0E3NTY9	HC	True	139		NA	1	0	p20[8:146]	582	No	No	Methanosarcina sp. MTP4	Euryarchaeota	Archaea	NA	Euryarchaeota	Methanomicrobia	Methanosarcinales	Methanosarcinaceae	Methanosarcina	Methanosarcina sp. MTP4	1434100
tr|Q46C71|Q46C71_METBF	Q46C71	HC	True	159		NA	1	0	p20[7:154]	587	No	No	Methanosarcina barkeri str. Fusaro	Euryarchaeota	Archaea	NA	Euryarchaeota	Methanomicrobia	Methanosarcinales	Methanosarcinaceae	Methanosarcina	Methanosarcina barkeri	269797
tr|A0A2K3J0R6|A0A2K3J0R6_9EURY	A0A2K3J0R6	HC	True	174		NA	1	0	p20[140:313]	436	No	No	Thermoplasmata archaeon M11B2D	Euryarchaeota	Archaea	NA	Euryarchaeota	Thermoplasmata	NA	NA	NA	Thermoplasmata archaeon M11B2D	1933281
tr|A0A0E3RIU7|A0A0E3RIU7_METMZ	A0A0E3RIU7	HC	True	132		NA	1	0	p20[2:133]	315	No	No	Methanosarcina mazei S-6	Euryarchaeota	Archaea	NA	Euryarchaeota	Methanomicrobia	Methanosarcinales	Methanosarcinaceae	Methanosarcina	Methanosarcina mazei	213585
tr|A0A0E3LHX0|A0A0E3LHX0_9EURY	A0A0E3LHX0	HC	True	148		NA	1	0	p20[7:148]	587	No	No	Methanosarcina vacuolata Z-761	Euryarchaeota	Archaea	NA	Euryarchaeota	Methanomicrobia	Methanosarcinales	Methanosarcinaceae	Methanosarcina	Methanosarcina vacuolata	1434123
tr|A0A257AQI5|A0A257AQI5_9EURY	A0A257AQI5	HC	True	134		NA	1	0	p20[345:473]	579	No	No	ANME-1 cluster archaeon ex4572_4	Euryarchaeota	Archaea	NA	Euryarchaeota	Methanomicrobia	NA	NA	NA	ANME-1 cluster archaeon ex4572_4	2011131
tr|A0A315XF02|A0A315XF02_9EURY	A0A315XF02	HC	True	155		NA	1	0	p20[6:154]	1264	No	No	Candidatus Methanoperedenaceae archaeon	Euryarchaeota	Archaea	NA	Euryarchaeota	Methanomicrobia	Methanosarcinales	Candidatus Methanoperedenaceae	NA	Candidatus Methanoperedenaceae archaeon	2072416
tr|A0A315XCX5|A0A315XCX5_9EURY	A0A315XCX5	HC	True	154		NA	1	0	p20[11:162]	798	No	No	Candidatus Methanoperedenaceae archaeon	Euryarchaeota	Archaea	NA	Euryarchaeota	Methanomicrobia	Methanosarcinales	Candidatus Methanoperedenaceae	NA	Candidatus Methanoperedenaceae archaeon	2072416
tr|A0A0E3PGI0|A0A0E3PGI0_9EURY	A0A0E3PGI0	HC	True	133		NA	1	0	p20[2:134]	315	No	No	Methanosarcina siciliae HI350	Euryarchaeota	Archaea	NA	Euryarchaeota	Methanomicrobia	Methanosarcinales	Methanosarcinaceae	Methanosarcina	Methanosarcina siciliae	1434119
tr|A0A1F5DIH2|A0A1F5DIH2_9ARCH	A0A1F5DIH2	HC	True	168		NA	1	0	p20[22:189]	323	No	No	Candidatus Bathyarchaeota archaeon RBG_13_38_9	Candidatus Bathyarchaeota	Archaea	NA	Candidatus Bathyarchaeota	NA	NA	NA	NA	Candidatus Bathyarchaeota archaeon RBG_13_38_9	1797377
tr|A0A0E3QA87|A0A0E3QA87_9EURY	A0A0E3QA87	HC	True	135		NA	1	0	p20[2:136]	315	No	No	Methanosarcina sp. Kolksee	Euryarchaeota	Archaea	NA	Euryarchaeota	Methanomicrobia	Methanosarcinales	Methanosarcinaceae	Methanosarcina	Methanosarcina sp. Kolksee	1434099
tr|A0A0E3QH56|A0A0E3QH56_9EURY	A0A0E3QH56	HC	True	139		NA	1	0	p20[8:146]	577	No	No	Methanosarcina sp. Kolksee	Euryarchaeota	Archaea	NA	Euryarchaeota	Methanomicrobia	Methanosarcinales	Methanosarcinaceae	Methanosarcina	Methanosarcina sp. Kolksee	1434099
tr|A0A0E3QGY0|A0A0E3QGY0_9EURY	A0A0E3QGY0	HC	True	148		NA	1	0	p20[7:148]	587	No	No	Methanosarcina sp. Kolksee	Euryarchaeota	Archaea	NA	Euryarchaeota	Methanomicrobia	Methanosarcinales	Methanosarcinaceae	Methanosarcina	Methanosarcina sp. Kolksee	1434099
tr|I3ZVI1|I3ZVI1_9EURY	I3ZVI1	HC	True	143		NA	1	0	p20[83:225]	312	No	No	Thermococcus cleftensis	Euryarchaeota	Archaea	NA	Euryarchaeota	Thermococci	Thermococcales	Thermococcaceae	Thermococcus	Thermococcus cleftensis	163003
tr|A0A0E3LCX8|A0A0E3LCX8_9EURY	A0A0E3LCX8	HC	True	146		NA	1	0	p20[3:145]	902	No	No	Methanosarcina siciliae C2J	Euryarchaeota	Archaea	NA	Euryarchaeota	Methanomicrobia	Methanosarcinales	Methanosarcinaceae	Methanosarcina	Methanosarcina siciliae	1434118
tr|F8AHH3|F8AHH3_PYRYC	F8AHH3	HC	True	143		NA	1	0	p20[85:227]	314	No	No	Pyrococcus yayanosii CH1	Euryarchaeota	Archaea	NA	Euryarchaeota	Thermococci	Thermococcales	Thermococcaceae	Pyrococcus	Pyrococcus yayanosii	529709
tr|A0A368TKI9|A0A368TKI9_9EURY	A0A368TKI9	HC	True	149		NA	1	0	p20[63:195]	602	No	No	ANME-1 cluster archaeon	Euryarchaeota	Archaea	NA	Euryarchaeota	Methanomicrobia	NA	NA	NA	ANME-1 cluster archaeon	2056316
tr|W0I7Y6|W0I7Y6_9EURY	W0I7Y6	HC	True	143		NA	1	0	p20[82:224]	311	No	No	Thermococcus paralvinellae	Euryarchaeota	Archaea	NA	Euryarchaeota	Thermococci	Thermococcales	Thermococcaceae	Thermococcus	Thermococcus paralvinellae	582419
tr|A0A0F8SC33|A0A0F8SC33_9EURY	A0A0F8SC33	HC	True	151		NA	1	0	p20[6:137]	867	No	No	Methanosarcina sp. 1.H.T.1A.1	Euryarchaeota	Archaea	NA	Euryarchaeota	Methanomicrobia	Methanosarcinales	Methanosarcinaceae	Methanosarcina	Methanosarcina sp. 1.H.T.1A.1	1483602
tr|A0A314ZZU5|A0A314ZZU5_9EURY	A0A314ZZU5	HC	True	143		NA	1	0	p20[2:143]	313	No	No	Methanohalophilus euhalobius	Euryarchaeota	Archaea	NA	Euryarchaeota	Methanomicrobia	Methanosarcinales	Methanosarcinaceae	Methanohalophilus	Methanohalophilus euhalobius	51203
tr|G7WN00|G7WN00_METH6	G7WN00	HC	True	154		NA	1	0	p20[5:151]	975	No	No	Methanosaeta harundinacea 6Ac	Euryarchaeota	Archaea	NA	Euryarchaeota	Methanomicrobia	Methanosarcinales	Methanosaetaceae	Methanothrix	Methanosaeta harundinacea	1110509
tr|A0A0P8AB09|A0A0P8AB09_9EURY	A0A0P8AB09	HC	True	139		NA	1	0	p20[2:135]	315	No	No	Candidatus Methanoperedens sp. BLZ1	Euryarchaeota	Archaea	NA	Euryarchaeota	Methanomicrobia	Methanosarcinales	Candidatus Methanoperedenaceae	Candidatus Methanoperedens	Candidatus Methanoperedens sp. BLZ1	1719120
tr|A0A2D6R6P8|A0A2D6R6P8_9ARCH	A0A2D6R6P8	HC	True	116		NA	1	0	p20[117:232]	316	No	No	archaeon	NA	Archaea	NA	NA	NA	NA	NA	NA	archaeon	1906665
tr|A0A0E3QPL0|A0A0E3QPL0_METBA	A0A0E3QPL0	HC	True	159		NA	1	0	p20[7:154]	587	No	No	Methanosarcina barkeri str. Wiesmoor	Euryarchaeota	Archaea	NA	Euryarchaeota	Methanomicrobia	Methanosarcinales	Methanosarcinaceae	Methanosarcina	Methanosarcina barkeri	1434109
tr|A0A2H3B7L1|A0A2H3B7L1_9AGAR	A0A2H3B7L1	HC	True	177		NA	1	0	p20[32:208]	356	No	No	Armillaria solidipes	Basidiomycota	Eukaryota	Fungi	Basidiomycota	Agaricomycetes	Agaricales	Physalacriaceae	Armillaria	Armillaria solidipes	1076256
tr|B2B3L6|B2B3L6_PODAN	B2B3L6	HC	True	163		NA	1	0	p20[10:171]	759	No	No	Podospora anserina S mat+	Ascomycota	Eukaryota	Fungi	Ascomycota	Sordariomycetes	Sordariales	Lasiosphaeriaceae	Podospora	Podospora anserina	515849
tr|A0A0C4EF34|A0A0C4EF34_MAGP6	A0A0C4EF34	HC	True	192		NA	1	0	p20[10:198]	340	No	No	Magnaporthiopsis poae ATCC 64411	Ascomycota	Eukaryota	Fungi	Ascomycota	Sordariomycetes	Magnaporthales	Magnaporthaceae	Magnaporthiopsis	Magnaporthiopsis poae	644358
tr|W7LWL2|W7LWL2_GIBM7	W7LWL2	HC	True	158		NA	1	0	p20[121:278]	367	No	No	Fusarium verticillioides 7600	Ascomycota	Eukaryota	Fungi	Ascomycota	Sordariomycetes	Hypocreales	Nectriaceae	Fusarium	Fusarium verticillioides	334819
tr|A0A2H3D907|A0A2H3D907_ARMGA	A0A2H3D907	HC	True	177		NA	1	0	p20[38:212]	333	No	No	Armillaria gallica	Basidiomycota	Eukaryota	Fungi	Basidiomycota	Agaricomycetes	Agaricales	Physalacriaceae	Armillaria	Armillaria gallica	47427
tr|I1RLN0|I1RLN0_GIBZE	I1RLN0	HC	True	129		NA	1	0	p20[227:354]	691	No	No	Fusarium graminearum PH-1	Ascomycota	Eukaryota	Fungi	Ascomycota	Sordariomycetes	Hypocreales	Nectriaceae	Fusarium	Fusarium graminearum	229533
tr|A0A098E512|A0A098E512_GIBZE	A0A098E512	HC	True	189		NA	1	0	p20[8:194]	704	No	No	Fusarium graminearum PH-1	Ascomycota	Eukaryota	Fungi	Ascomycota	Sordariomycetes	Hypocreales	Nectriaceae	Fusarium	Fusarium graminearum	229533
tr|J3PGA7|J3PGA7_GAGT3	J3PGA7	HC	True	177		NA	1	0	p20[9:179]	522	No	No	Gaeumannomyces tritici R3-111a-1	Ascomycota	Eukaryota	Fungi	Ascomycota	Sordariomycetes	Magnaporthales	Magnaporthaceae	Gaeumannomyces	Gaeumannomyces tritici	644352
tr|J3PJY7|J3PJY7_GAGT3	J3PJY7	HC	True	189		NA	1	0	p20[9:197]	679	No	No	Gaeumannomyces tritici R3-111a-1	Ascomycota	Eukaryota	Fungi	Ascomycota	Sordariomycetes	Magnaporthales	Magnaporthaceae	Gaeumannomyces	Gaeumannomyces tritici	644352
tr|J3P1S8|J3P1S8_GAGT3	J3P1S8	HC	True	158		NA	1	0	p20[10:167]	701	No	No	Gaeumannomyces tritici R3-111a-1	Ascomycota	Eukaryota	Fungi	Ascomycota	Sordariomycetes	Magnaporthales	Magnaporthaceae	Gaeumannomyces	Gaeumannomyces tritici	644352
tr|J3P791|J3P791_GAGT3	J3P791	HC	True	169		NA	1	0	p20[24:192]	743	No	No	Gaeumannomyces tritici R3-111a-1	Ascomycota	Eukaryota	Fungi	Ascomycota	Sordariomycetes	Magnaporthales	Magnaporthaceae	Gaeumannomyces	Gaeumannomyces tritici	644352
tr|J3PJ90|J3PJ90_GAGT3	J3PJ90	HC	True	176		NA	1	0	p20[250:420]	554	No	No	Gaeumannomyces tritici R3-111a-1	Ascomycota	Eukaryota	Fungi	Ascomycota	Sordariomycetes	Magnaporthales	Magnaporthaceae	Gaeumannomyces	Gaeumannomyces tritici	644352
tr|A0A1V8U945|A0A1V8U945_9PEZI	A0A1V8U945	HC	True	160		NA	1	0	p20[126:285]	394	No	No	Rachicladosporium sp. CCFEE 5018	Ascomycota	Eukaryota	Fungi	Ascomycota	Dothideomycetes	Capnodiales	Cladosporiaceae	Rachicladosporium	Rachicladosporium sp. CCFEE 5018	1974281
tr|A0A1L9R7H7|A0A1L9R7H7_ASPWE	A0A1L9R7H7	HC	True	150		NA	1	0	p20[6:151]	809	No	No	Aspergillus wentii DTO 134E9	Ascomycota	Eukaryota	Fungi	Ascomycota	Eurotiomycetes	Eurotiales	Aspergillaceae	Aspergillus	Aspergillus wentii	1073089
tr|A0A177FLZ8|A0A177FLZ8_9EURO	A0A177FLZ8	HC	True	189		NA	1	0	p20[8:196]	706	No	No	Fonsecaea monophora	Ascomycota	Eukaryota	Fungi	Ascomycota	Eurotiomycetes	Chaetothyriales	Herpotrichiellaceae	Fonsecaea	Fonsecaea monophora	254056
tr|A0A177ERW4|A0A177ERW4_9EURO	A0A177ERW4	HC	True	144		NA	1	0	p20[5:148]	305	No	No	Fonsecaea monophora	Ascomycota	Eukaryota	Fungi	Ascomycota	Eurotiomycetes	Chaetothyriales	Herpotrichiellaceae	Fonsecaea	Fonsecaea monophora	254056
tr|A0A177EVH8|A0A177EVH8_9EURO	A0A177EVH8	HC	True	166		NA	1	0	p20[8:173]	673	No	No	Fonsecaea monophora	Ascomycota	Eukaryota	Fungi	Ascomycota	Eurotiomycetes	Chaetothyriales	Herpotrichiellaceae	Fonsecaea	Fonsecaea monophora	254056
tr|A0A177F3F5|A0A177F3F5_9EURO	A0A177F3F5	HC	True	161		NA	1	0	p20[250:410]	1002	No	No	Fonsecaea monophora	Ascomycota	Eukaryota	Fungi	Ascomycota	Eurotiomycetes	Chaetothyriales	Herpotrichiellaceae	Fonsecaea	Fonsecaea monophora	254056
tr|A0A0B7F722|A0A0B7F722_THACB	A0A0B7F722	HC	True	168		NA	1	0	p20[72:239]	730	No	No	Rhizoctonia solani AG-1 IB	Basidiomycota	Eukaryota	Fungi	Basidiomycota	Agaricomycetes	Cantharellales	Ceratobasidiaceae	Rhizoctonia	Rhizoctonia solani	1108050
tr|A0A0B7FAS6|A0A0B7FAS6_THACB	A0A0B7FAS6	HC	True	154		NA	1	0	p20[29:182]	704	No	No	Rhizoctonia solani AG-1 IB	Basidiomycota	Eukaryota	Fungi	Basidiomycota	Agaricomycetes	Cantharellales	Ceratobasidiaceae	Rhizoctonia	Rhizoctonia solani	1108050
tr|A0A0B7FUL4|A0A0B7FUL4_THACB	A0A0B7FUL4	HC	True	156		NA	1	0	p20[38:193]	687	No	No	Rhizoctonia solani AG-1 IB	Basidiomycota	Eukaryota	Fungi	Basidiomycota	Agaricomycetes	Cantharellales	Ceratobasidiaceae	Rhizoctonia	Rhizoctonia solani	1108050
tr|A0A0B7FDB5|A0A0B7FDB5_THACB	A0A0B7FDB5	HC	True	156		NA	1	0	p20[38:193]	846	No	No	Rhizoctonia solani AG-1 IB	Basidiomycota	Eukaryota	Fungi	Basidiomycota	Agaricomycetes	Cantharellales	Ceratobasidiaceae	Rhizoctonia	Rhizoctonia solani	1108050
tr|A0A0B7F5J5|A0A0B7F5J5_THACB	A0A0B7F5J5	HC	True	192		NA	1	0	p20[26:217]	686	No	No	Rhizoctonia solani AG-1 IB	Basidiomycota	Eukaryota	Fungi	Basidiomycota	Agaricomycetes	Cantharellales	Ceratobasidiaceae	Rhizoctonia	Rhizoctonia solani	1108050
tr|M5C0Y3|M5C0Y3_THACB	M5C0Y3	HC	True	156		NA	1	0	p20[38:193]	492	No	No	Rhizoctonia solani AG-1 IB	Basidiomycota	Eukaryota	Fungi	Basidiomycota	Agaricomycetes	Cantharellales	Ceratobasidiaceae	Rhizoctonia	Rhizoctonia solani	1108050
tr|M5BRC7|M5BRC7_THACB	M5BRC7	HC	True	137		NA	1	0	p20[3:139]	150	No	No	Rhizoctonia solani AG-1 IB	Basidiomycota	Eukaryota	Fungi	Basidiomycota	Agaricomycetes	Cantharellales	Ceratobasidiaceae	Rhizoctonia	Rhizoctonia solani	1108050
tr|A0A0B7FAV5|A0A0B7FAV5_THACB	A0A0B7FAV5	HC	True	161		NA	1	0	p20[72:231]	745	No	No	Rhizoctonia solani AG-1 IB	Basidiomycota	Eukaryota	Fungi	Basidiomycota	Agaricomycetes	Cantharellales	Ceratobasidiaceae	Rhizoctonia	Rhizoctonia solani	1108050
tr|A0A0B7F8I2|A0A0B7F8I2_THACB	A0A0B7F8I2	HC	True	154		NA	1	0	p20[183:333]	631	No	No	Rhizoctonia solani AG-1 IB	Basidiomycota	Eukaryota	Fungi	Basidiomycota	Agaricomycetes	Cantharellales	Ceratobasidiaceae	Rhizoctonia	Rhizoctonia solani	1108050
tr|M5C6B6|M5C6B6_THACB	M5C6B6	YC	Pseudo	155		NA	1	0	p20[54:207]	887	No	No	Rhizoctonia solani AG-1 IB	Basidiomycota	Eukaryota	Fungi	Basidiomycota	Agaricomycetes	Cantharellales	Ceratobasidiaceae	Rhizoctonia	Rhizoctonia solani	1108050
tr|A0A0B7FFR6|A0A0B7FFR6_THACB	A0A0B7FFR6	HC	True	146		NA	1	0	p20[216:357]	485	No	No	Rhizoctonia solani AG-1 IB	Basidiomycota	Eukaryota	Fungi	Basidiomycota	Agaricomycetes	Cantharellales	Ceratobasidiaceae	Rhizoctonia	Rhizoctonia solani	1108050
tr|A0A0B7FIQ3|A0A0B7FIQ3_THACB	A0A0B7FIQ3	HF	Pseudo	179		NA	1	0	p20[46:224]	374	No	No	Rhizoctonia solani AG-1 IB	Basidiomycota	Eukaryota	Fungi	Basidiomycota	Agaricomycetes	Cantharellales	Ceratobasidiaceae	Rhizoctonia	Rhizoctonia solani	1108050
tr|A0A0B7G1M0|A0A0B7G1M0_THACB	A0A0B7G1M0	HC	True	145		NA	1	0	p20[17:161]	272	No	No	Rhizoctonia solani AG-1 IB	Basidiomycota	Eukaryota	Fungi	Basidiomycota	Agaricomycetes	Cantharellales	Ceratobasidiaceae	Rhizoctonia	Rhizoctonia solani	1108050
tr|A0A0B7FL17|A0A0B7FL17_THACB	A0A0B7FL17	HC	True	160		NA	1	0	p20[348:507]	689	No	No	Rhizoctonia solani AG-1 IB	Basidiomycota	Eukaryota	Fungi	Basidiomycota	Agaricomycetes	Cantharellales	Ceratobasidiaceae	Rhizoctonia	Rhizoctonia solani	1108050
tr|A0A0B7G0D4|A0A0B7G0D4_THACB	A0A0B7G0D4	YS	Pseudo	146		NA	1	0	p20[491:635]	1338	No	No	Rhizoctonia solani AG-1 IB	Basidiomycota	Eukaryota	Fungi	Basidiomycota	Agaricomycetes	Cantharellales	Ceratobasidiaceae	Rhizoctonia	Rhizoctonia solani	1108050
tr|A0A0B7G0C9|A0A0B7G0C9_THACB	A0A0B7G0C9	HC	True	159		NA	1	0	p20[86:244]	404	No	No	Rhizoctonia solani AG-1 IB	Basidiomycota	Eukaryota	Fungi	Basidiomycota	Agaricomycetes	Cantharellales	Ceratobasidiaceae	Rhizoctonia	Rhizoctonia solani	1108050
tr|M5BV76|M5BV76_THACB	M5BV76	HC	True	160		NA	1	0	p20[181:340]	472	No	No	Rhizoctonia solani AG-1 IB	Basidiomycota	Eukaryota	Fungi	Basidiomycota	Agaricomycetes	Cantharellales	Ceratobasidiaceae	Rhizoctonia	Rhizoctonia solani	1108050
tr|A0A0B7FA21|A0A0B7FA21_THACB	A0A0B7FA21	HC	True	156		NA	1	0	p20[15:169]	735	No	No	Rhizoctonia solani AG-1 IB	Basidiomycota	Eukaryota	Fungi	Basidiomycota	Agaricomycetes	Cantharellales	Ceratobasidiaceae	Rhizoctonia	Rhizoctonia solani	1108050
tr|A0A0B7FHU6|A0A0B7FHU6_THACB	A0A0B7FHU6	HC	True	176		NA	1	0	p20[202:377]	572	No	No	Rhizoctonia solani AG-1 IB	Basidiomycota	Eukaryota	Fungi	Basidiomycota	Agaricomycetes	Cantharellales	Ceratobasidiaceae	Rhizoctonia	Rhizoctonia solani	1108050
tr|M5CCP4|M5CCP4_THACB	M5CCP4	HC	True	145		NA	1	0	p20[54:198]	695	No	No	Rhizoctonia solani AG-1 IB	Basidiomycota	Eukaryota	Fungi	Basidiomycota	Agaricomycetes	Cantharellales	Ceratobasidiaceae	Rhizoctonia	Rhizoctonia solani	1108050
tr|A0A0B7FAK2|A0A0B7FAK2_THACB	A0A0B7FAK2	HC	True	166		NA	1	0	p20[18:183]	700	No	No	Rhizoctonia solani AG-1 IB	Basidiomycota	Eukaryota	Fungi	Basidiomycota	Agaricomycetes	Cantharellales	Ceratobasidiaceae	Rhizoctonia	Rhizoctonia solani	1108050
tr|A0A0B7G4I0|A0A0B7G4I0_THACB	A0A0B7G4I0	YC	Pseudo	159		NA	1	0	p20[54:210]	910	No	No	Rhizoctonia solani AG-1 IB	Basidiomycota	Eukaryota	Fungi	Basidiomycota	Agaricomycetes	Cantharellales	Ceratobasidiaceae	Rhizoctonia	Rhizoctonia solani	1108050
tr|A0A0B7FG50|A0A0B7FG50_THACB	A0A0B7FG50	HC	True	175		NA	1	0	p20[223:397]	448	No	No	Rhizoctonia solani AG-1 IB	Basidiomycota	Eukaryota	Fungi	Basidiomycota	Agaricomycetes	Cantharellales	Ceratobasidiaceae	Rhizoctonia	Rhizoctonia solani	1108050
tr|A0A0B7FB25|A0A0B7FB25_THACB	A0A0B7FB25	HC	True	173		NA	1	0	p20[27:199]	802	No	No	Rhizoctonia solani AG-1 IB	Basidiomycota	Eukaryota	Fungi	Basidiomycota	Agaricomycetes	Cantharellales	Ceratobasidiaceae	Rhizoctonia	Rhizoctonia solani	1108050
tr|M5C5H2|M5C5H2_THACB	M5C5H2	HC	True	145		NA	1	0	p20[56:200]	697	No	No	Rhizoctonia solani AG-1 IB	Basidiomycota	Eukaryota	Fungi	Basidiomycota	Agaricomycetes	Cantharellales	Ceratobasidiaceae	Rhizoctonia	Rhizoctonia solani	1108050
tr|A0A0B7FFC8|A0A0B7FFC8_THACB	A0A0B7FFC8	HC	True	105		NA	1	0	p20[3:104]	531	No	No	Rhizoctonia solani AG-1 IB	Basidiomycota	Eukaryota	Fungi	Basidiomycota	Agaricomycetes	Cantharellales	Ceratobasidiaceae	Rhizoctonia	Rhizoctonia solani	1108050
tr|M5CBC7|M5CBC7_THACB	M5CBC7	HC	True	158		NA	1	0	p20[17:173]	616	No	No	Rhizoctonia solani AG-1 IB	Basidiomycota	Eukaryota	Fungi	Basidiomycota	Agaricomycetes	Cantharellales	Ceratobasidiaceae	Rhizoctonia	Rhizoctonia solani	1108050
tr|M5BYS3|M5BYS3_THACB	M5BYS3	HC	True	195		NA	1	0	p20[16:209]	319	No	No	Rhizoctonia solani AG-1 IB	Basidiomycota	Eukaryota	Fungi	Basidiomycota	Agaricomycetes	Cantharellales	Ceratobasidiaceae	Rhizoctonia	Rhizoctonia solani	1108050
tr|A0A0B7FV47|A0A0B7FV47_THACB	A0A0B7FV47	HC	True	145		NA	1	0	p20[56:200]	311	No	No	Rhizoctonia solani AG-1 IB	Basidiomycota	Eukaryota	Fungi	Basidiomycota	Agaricomycetes	Cantharellales	Ceratobasidiaceae	Rhizoctonia	Rhizoctonia solani	1108050
tr|M5BPW9|M5BPW9_THACB	M5BPW9	NF	Pseudo	190		NA	1	0	p20[46:231]	332	No	No	Rhizoctonia solani AG-1 IB	Basidiomycota	Eukaryota	Fungi	Basidiomycota	Agaricomycetes	Cantharellales	Ceratobasidiaceae	Rhizoctonia	Rhizoctonia solani	1108050
tr|A0A0B7F8M6|A0A0B7F8M6_THACB	A0A0B7F8M6	HC	True	142		NA	1	0	p20[11:152]	685	No	No	Rhizoctonia solani AG-1 IB	Basidiomycota	Eukaryota	Fungi	Basidiomycota	Agaricomycetes	Cantharellales	Ceratobasidiaceae	Rhizoctonia	Rhizoctonia solani	1108050
tr|M5CDW3|M5CDW3_THACB	M5CDW3	HC	True	142		NA	1	0	p20[11:152]	685	No	No	Rhizoctonia solani AG-1 IB	Basidiomycota	Eukaryota	Fungi	Basidiomycota	Agaricomycetes	Cantharellales	Ceratobasidiaceae	Rhizoctonia	Rhizoctonia solani	1108050
tr|M5C3R1|M5C3R1_THACB	M5C3R1	HC	True	176		NA	1	0	p20[170:345]	540	No	No	Rhizoctonia solani AG-1 IB	Basidiomycota	Eukaryota	Fungi	Basidiomycota	Agaricomycetes	Cantharellales	Ceratobasidiaceae	Rhizoctonia	Rhizoctonia solani	1108050
tr|A0A0B7FFA0|A0A0B7FFA0_THACB	A0A0B7FFA0	HC	True	172		NA	1	0	p20[55:226]	425	No	No	Rhizoctonia solani AG-1 IB	Basidiomycota	Eukaryota	Fungi	Basidiomycota	Agaricomycetes	Cantharellales	Ceratobasidiaceae	Rhizoctonia	Rhizoctonia solani	1108050
tr|A0A0B7F8K5|A0A0B7F8K5_THACB	A0A0B7F8K5	HC	True	158		NA	1	0	p20[159:316]	541	No	No	Rhizoctonia solani AG-1 IB	Basidiomycota	Eukaryota	Fungi	Basidiomycota	Agaricomycetes	Cantharellales	Ceratobasidiaceae	Rhizoctonia	Rhizoctonia solani	1108050
tr|A0A0B7FCA0|A0A0B7FCA0_THACB	A0A0B7FCA0	HC	True	116		NA	1	0	p20[298:413]	508	No	No	Rhizoctonia solani AG-1 IB	Basidiomycota	Eukaryota	Fungi	Basidiomycota	Agaricomycetes	Cantharellales	Ceratobasidiaceae	Rhizoctonia	Rhizoctonia solani	1108050
tr|A0A0B7F8W4|A0A0B7F8W4_THACB	A0A0B7F8W4	HC	True	162		NA	1	0	p20[61:222]	736	No	No	Rhizoctonia solani AG-1 IB	Basidiomycota	Eukaryota	Fungi	Basidiomycota	Agaricomycetes	Cantharellales	Ceratobasidiaceae	Rhizoctonia	Rhizoctonia solani	1108050
tr|A0A1Y2U628|A0A1Y2U628_9PEZI	A0A1Y2U628	HC	True	165		NA	1	0	p20[13:177]	666	No	No	Hypoxylon sp. EC38	Ascomycota	Eukaryota	Fungi	Ascomycota	Sordariomycetes	Xylariales	Hypoxylaceae	Hypoxylon	Hypoxylon sp. EC38	1001937
tr|A0A1Y1UN49|A0A1Y1UN49_9FUNG	A0A1Y1UN49	HC	True	167		NA	1	0	p20[59:218]	363	No	No	Piromyces finnis	Chytridiomycota	Eukaryota	Fungi	Chytridiomycota	Neocallimastigomycetes	Neocallimastigales	Neocallimastigaceae	Piromyces	Piromyces finnis	1754191
tr|A0A1Y2TGD3|A0A1Y2TGD3_9PEZI	A0A1Y2TGD3	HC	True	158		NA	1	0	p20[11:167]	673	No	No	Hypoxylon sp. EC38	Ascomycota	Eukaryota	Fungi	Ascomycota	Sordariomycetes	Xylariales	Hypoxylaceae	Hypoxylon	Hypoxylon sp. EC38	1001937
tr|A0A1Y2TFG9|A0A1Y2TFG9_9PEZI	A0A1Y2TFG9	HC	True	151		NA	1	0	p20[11:161]	645	No	No	Hypoxylon sp. EC38	Ascomycota	Eukaryota	Fungi	Ascomycota	Sordariomycetes	Xylariales	Hypoxylaceae	Hypoxylon	Hypoxylon sp. EC38	1001937
tr|A0A2H3TQW1|A0A2H3TQW1_FUSOX	A0A2H3TQW1	HC	True	153		NA	1	0	p20[2:154]	662	No	No	Fusarium oxysporum	Ascomycota	Eukaryota	Fungi	Ascomycota	Sordariomycetes	Hypocreales	Nectriaceae	Fusarium	Fusarium oxysporum	5507
tr|A0A2H3SNU0|A0A2H3SNU0_FUSOX	A0A2H3SNU0	HC	True	149		NA	1	0	p20[30:178]	667	No	No	Fusarium oxysporum	Ascomycota	Eukaryota	Fungi	Ascomycota	Sordariomycetes	Hypocreales	Nectriaceae	Fusarium	Fusarium oxysporum	5507
tr|A0A2H3TND7|A0A2H3TND7_FUSOX	A0A2H3TND7	HC	True	167		NA	1	0	p20[18:177]	647	No	No	Fusarium oxysporum	Ascomycota	Eukaryota	Fungi	Ascomycota	Sordariomycetes	Hypocreales	Nectriaceae	Fusarium	Fusarium oxysporum	5507
tr|A0A0C3GRZ3|A0A0C3GRZ3_9PEZI	A0A0C3GRZ3	HC	True	165		NA	1	0	p20[3:161]	593	No	No	Oidiodendron maius Zn	Ascomycota	Eukaryota	Fungi	Ascomycota	Leotiomycetes	NA	Myxotrichaceae	Oidiodendron	Oidiodendron maius	913774
tr|W4K2M3|W4K2M3_9HOMO	W4K2M3	HC	True	171		NA	1	0	p20[34:197]	709	No	No	Heterobasidion irregulare TC 32-1	Basidiomycota	Eukaryota	Fungi	Basidiomycota	Agaricomycetes	Russulales	Bondarzewiaceae	Heterobasidion	Heterobasidion irregulare	747525
tr|A0A365NLT7|A0A365NLT7_GIBIN	A0A365NLT7	HC	True	171		NA	1	0	p20[10:180]	669	No	No	Fusarium proliferatum	Ascomycota	Eukaryota	Fungi	Ascomycota	Sordariomycetes	Hypocreales	Nectriaceae	Fusarium	Fusarium proliferatum	948311
tr|A0A365MY67|A0A365MY67_GIBIN	A0A365MY67	HC	True	156		NA	1	0	p20[12:167]	661	No	No	Fusarium proliferatum	Ascomycota	Eukaryota	Fungi	Ascomycota	Sordariomycetes	Hypocreales	Nectriaceae	Fusarium	Fusarium proliferatum	948311
tr|W4JUP0|W4JUP0_9HOMO	W4JUP0	RC	Pseudo	133		NA	1	0	p20[2:134]	135	No	No	Heterobasidion irregulare TC 32-1	Basidiomycota	Eukaryota	Fungi	Basidiomycota	Agaricomycetes	Russulales	Bondarzewiaceae	Heterobasidion	Heterobasidion irregulare	747525
tr|G1XID8|G1XID8_ARTOA	G1XID8	HC	True	169		NA	1	0	p20[5:173]	856	No	No	Arthrobotrys oligospora ATCC 24927	Ascomycota	Eukaryota	Fungi	Ascomycota	Orbiliomycetes	Orbiliales	Orbiliaceae	Arthrobotrys	Arthrobotrys oligospora	756982
tr|W4JVV3|W4JVV3_9HOMO	W4JVV3	HC	True	150		NA	1	0	p20[27:176]	218	No	No	Heterobasidion irregulare TC 32-1	Basidiomycota	Eukaryota	Fungi	Basidiomycota	Agaricomycetes	Russulales	Bondarzewiaceae	Heterobasidion	Heterobasidion irregulare	747525
tr|A0A0C9SSG8|A0A0C9SSG8_PAXIN	A0A0C9SSG8	HC	True	174		NA	1	0	p20[12:183]	344	No	No	Paxillus involutus ATCC 200175	Basidiomycota	Eukaryota	Fungi	Basidiomycota	Agaricomycetes	Boletales	Paxillaceae	Paxillus	Paxillus involutus	664439
tr|G1XT97|G1XT97_ARTOA	G1XT97	HC	True	166		NA	1	0	p20[176:341]	405	No	No	Arthrobotrys oligospora ATCC 24927	Ascomycota	Eukaryota	Fungi	Ascomycota	Orbiliomycetes	Orbiliales	Orbiliaceae	Arthrobotrys	Arthrobotrys oligospora	756982
tr|G1XIE4|G1XIE4_ARTOA	G1XIE4	HC	True	181		NA	1	0	p20[8:183]	704	No	No	Arthrobotrys oligospora ATCC 24927	Ascomycota	Eukaryota	Fungi	Ascomycota	Orbiliomycetes	Orbiliales	Orbiliaceae	Arthrobotrys	Arthrobotrys oligospora	756982
tr|W4JVW8|W4JVW8_9HOMO	W4JVW8	HC	True	155		NA	1	0	p20[13:167]	382	No	No	Heterobasidion irregulare TC 32-1	Basidiomycota	Eukaryota	Fungi	Basidiomycota	Agaricomycetes	Russulales	Bondarzewiaceae	Heterobasidion	Heterobasidion irregulare	747525
tr|G1XIE3|G1XIE3_ARTOA	G1XIE3	HC	True	178		NA	1	0	p20[8:185]	718	No	No	Arthrobotrys oligospora ATCC 24927	Ascomycota	Eukaryota	Fungi	Ascomycota	Orbiliomycetes	Orbiliales	Orbiliaceae	Arthrobotrys	Arthrobotrys oligospora	756982
tr|W4JX19|W4JX19_9HOMO	W4JX19	HC	True	166		NA	1	0	p20[6:164]	657	No	No	Heterobasidion irregulare TC 32-1	Basidiomycota	Eukaryota	Fungi	Basidiomycota	Agaricomycetes	Russulales	Bondarzewiaceae	Heterobasidion	Heterobasidion irregulare	747525
tr|G1XSE5|G1XSE5_ARTOA	G1XSE5	HC	True	173		NA	1	0	p20[10:182]	736	No	No	Arthrobotrys oligospora ATCC 24927	Ascomycota	Eukaryota	Fungi	Ascomycota	Orbiliomycetes	Orbiliales	Orbiliaceae	Arthrobotrys	Arthrobotrys oligospora	756982
tr|W4K3V3|W4K3V3_9HOMO	W4K3V3	HC	True	152		NA	1	0	p20[165:315]	722	No	No	Heterobasidion irregulare TC 32-1	Basidiomycota	Eukaryota	Fungi	Basidiomycota	Agaricomycetes	Russulales	Bondarzewiaceae	Heterobasidion	Heterobasidion irregulare	747525
tr|G1XRS3|G1XRS3_ARTOA	G1XRS3	HC	True	175		NA	1	0	p20[798:972]	1506	No	No	Arthrobotrys oligospora ATCC 24927	Ascomycota	Eukaryota	Fungi	Ascomycota	Orbiliomycetes	Orbiliales	Orbiliaceae	Arthrobotrys	Arthrobotrys oligospora	756982
tr|G1XLD3|G1XLD3_ARTOA	G1XLD3	HC	True	185		NA	1	0	p20[5:189]	689	No	No	Arthrobotrys oligospora ATCC 24927	Ascomycota	Eukaryota	Fungi	Ascomycota	Orbiliomycetes	Orbiliales	Orbiliaceae	Arthrobotrys	Arthrobotrys oligospora	756982
tr|K9GXE2|K9GXE2_PEND1	K9GXE2	HC	True	168		NA	1	0	p20[61:228]	290	No	No	Penicillium digitatum Pd1	Ascomycota	Eukaryota	Fungi	Ascomycota	Eurotiomycetes	Eurotiales	Aspergillaceae	Penicillium	Penicillium digitatum	1170230
tr|A0A060S7K5|A0A060S7K5_PYCCI	A0A060S7K5	HC	True	153		NA	1	0	p20[15:167]	272	No	No	Trametes cinnabarina	Basidiomycota	Eukaryota	Fungi	Basidiomycota	Agaricomycetes	Polyporales	Polyporaceae	Trametes	Trametes cinnabarina	5643
tr|A0A1F5L4W5|A0A1F5L4W5_9EURO	A0A1F5L4W5	HC	True	163		NA	1	0	p20[11:166]	648	No	No	Penicillium arizonense	Ascomycota	Eukaryota	Fungi	Ascomycota	Eurotiomycetes	Eurotiales	Aspergillaceae	Penicillium	Penicillium arizonense	1835702
tr|A0A060SFK0|A0A060SFK0_PYCCI	A0A060SFK0	PC	Pseudo	193		NA	1	0	p20[20:212]	490	No	No	Trametes cinnabarina	Basidiomycota	Eukaryota	Fungi	Basidiomycota	Agaricomycetes	Polyporales	Polyporaceae	Trametes	Trametes cinnabarina	5643
tr|A0A060S457|A0A060S457_PYCCI	A0A060S457	HC	True	151		NA	1	0	p20[6:156]	654	No	No	Trametes cinnabarina	Basidiomycota	Eukaryota	Fungi	Basidiomycota	Agaricomycetes	Polyporales	Polyporaceae	Trametes	Trametes cinnabarina	5643
tr|I7ZK74|I7ZK74_ASPO3	I7ZK74	HC	True	153		NA	1	0	p20[4:156]	822	No	No	Aspergillus oryzae 3.042	Ascomycota	Eukaryota	Fungi	Ascomycota	Eurotiomycetes	Eurotiales	Aspergillaceae	Aspergillus	Aspergillus oryzae	1160506
tr|A0A1F8A8N2|A0A1F8A8N2_9EURO	A0A1F8A8N2	HC	True	150		NA	1	0	p20[5:154]	814	No	No	Aspergillus bombycis	Ascomycota	Eukaryota	Fungi	Ascomycota	Eurotiomycetes	Eurotiales	Aspergillaceae	Aspergillus	Aspergillus bombycis	109264
tr|F9FEV8|F9FEV8_FUSOF	F9FEV8	HC	True	193		NA	1	0	p20[9:201]	659	No	No	Fusarium oxysporum Fo5176	Ascomycota	Eukaryota	Fungi	Ascomycota	Sordariomycetes	Hypocreales	Nectriaceae	Fusarium	Fusarium oxysporum	660025
tr|S8BK44|S8BK44_DACHA	S8BK44	HC	True	143		NA	1	0	p20[152:290]	819	No	No	Dactylellina haptotyla CBS 200.50	Ascomycota	Eukaryota	Fungi	Ascomycota	Orbiliomycetes	Orbiliales	Orbiliaceae	Dactylellina	Dactylellina haptotyla	1284197
tr|S8AR72|S8AR72_DACHA	S8AR72	HC	True	178		NA	1	0	p20[10:183]	726	No	No	Dactylellina haptotyla CBS 200.50	Ascomycota	Eukaryota	Fungi	Ascomycota	Orbiliomycetes	Orbiliales	Orbiliaceae	Dactylellina	Dactylellina haptotyla	1284197
tr|A0A1Y2M6P9|A0A1Y2M6P9_EPING	A0A1Y2M6P9	HC	True	146		NA	1	0	p20[11:156]	632	No	No	Epicoccum nigrum	Ascomycota	Eukaryota	Fungi	Ascomycota	Dothideomycetes	Pleosporales	Didymellaceae	Epicoccum	Epicoccum nigrum	105696
tr|F8PKD2|F8PKD2_SERL3	F8PKD2	HC	True	173		NA	1	0	p20[14:186]	408	No	No	Serpula lacrymans var. lacrymans S7.3	Basidiomycota	Eukaryota	Fungi	Basidiomycota	Agaricomycetes	Boletales	Serpulaceae	Serpula	Serpula lacrymans	936435
tr|F9G2K8|F9G2K8_FUSOF	F9G2K8	HC	True	149		NA	1	0	p20[30:178]	499	No	No	Fusarium oxysporum Fo5176	Ascomycota	Eukaryota	Fungi	Ascomycota	Sordariomycetes	Hypocreales	Nectriaceae	Fusarium	Fusarium oxysporum	660025
tr|F9FH88|F9FH88_FUSOF	F9FH88	HC	True	158		NA	1	0	p20[10:167]	638	No	No	Fusarium oxysporum Fo5176	Ascomycota	Eukaryota	Fungi	Ascomycota	Sordariomycetes	Hypocreales	Nectriaceae	Fusarium	Fusarium oxysporum	660025
tr|A0A0B7K4B6|A0A0B7K4B6_BIOOC	A0A0B7K4B6	HC	True	169		NA	1	0	p20[10:172]	660	No	No	Clonostachys rosea	Ascomycota	Eukaryota	Fungi	Ascomycota	Sordariomycetes	Hypocreales	Bionectriaceae	Clonostachys	Clonostachys rosea	29856
tr|A0A1E3BI10|A0A1E3BI10_9EURO	A0A1E3BI10	HC	True	160		NA	1	0	p20[4:163]	597	No	No	Aspergillus cristatus	Ascomycota	Eukaryota	Fungi	Ascomycota	Eurotiomycetes	Eurotiales	Aspergillaceae	Aspergillus	Aspergillus cristatus	573508
tr|A0A074WEU9|A0A074WEU9_9PEZI	A0A074WEU9	HC	True	164		NA	1	0	p20[4:161]	271	No	No	Aureobasidium namibiae CBS 147.97	Ascomycota	Eukaryota	Fungi	Ascomycota	Dothideomycetes	Dothideales	Saccotheciaceae	Aureobasidium	Aureobasidium namibiae	1043004
tr|A0A1E3B1V5|A0A1E3B1V5_9EURO	A0A1E3B1V5	HC	True	160		NA	1	0	p20[93:252]	353	No	No	Aspergillus cristatus	Ascomycota	Eukaryota	Fungi	Ascomycota	Eurotiomycetes	Eurotiales	Aspergillaceae	Aspergillus	Aspergillus cristatus	573508
tr|A0A1B8DFF5|A0A1B8DFF5_9PEZI	A0A1B8DFF5	HC	True	141		NA	1	0	p20[174:313]	452	No	No	Pseudogymnoascus sp. 24MN13	Ascomycota	Eukaryota	Fungi	Ascomycota	Leotiomycetes	NA	Pseudeurotiaceae	Pseudogymnoascus	Pseudogymnoascus sp. 24MN13	1622150
tr|A0A2K0TWI3|A0A2K0TWI3_TRIHA	A0A2K0TWI3	HC	True	176		NA	1	0	p20[8:182]	729	No	No	Trichoderma harzianum	Ascomycota	Eukaryota	Fungi	Ascomycota	Sordariomycetes	Hypocreales	Hypocreaceae	Trichoderma	Trichoderma harzianum	5544
tr|A0A178C9X3|A0A178C9X3_9EURO	A0A178C9X3	HC	True	142		NA	1	0	p20[4:145]	146	No	No	Fonsecaea multimorphosa	Ascomycota	Eukaryota	Fungi	Ascomycota	Eurotiomycetes	Chaetothyriales	Herpotrichiellaceae	Fonsecaea	Fonsecaea multimorphosa	979981
tr|A0A2N1LCQ7|A0A2N1LCQ7_TRIHA	A0A2N1LCQ7	HC	True	152		NA	1	0	p20[9:159]	673	No	No	Trichoderma harzianum	Ascomycota	Eukaryota	Fungi	Ascomycota	Sordariomycetes	Hypocreales	Hypocreaceae	Trichoderma	Trichoderma harzianum	5544
tr|A0A2N1LSP6|A0A2N1LSP6_TRIHA	A0A2N1LSP6	HC	True	128		NA	1	0	p20[27:154]	696	No	No	Trichoderma harzianum	Ascomycota	Eukaryota	Fungi	Ascomycota	Sordariomycetes	Hypocreales	Hypocreaceae	Trichoderma	Trichoderma harzianum	5544
tr|A0A0D0EAH9|A0A0D0EAH9_9HOMO	A0A0D0EAH9	HC	True	176		NA	1	0	p20[14:189]	394	No	No	Paxillus rubicundulus Ve08.2h10	Basidiomycota	Eukaryota	Fungi	Basidiomycota	Agaricomycetes	Boletales	Paxillaceae	Paxillus	Paxillus rubicundulus	930991
tr|A0A0D0E086|A0A0D0E086_9HOMO	A0A0D0E086	HC	True	173		NA	1	0	p20[5:177]	308	No	No	Paxillus rubicundulus Ve08.2h10	Basidiomycota	Eukaryota	Fungi	Basidiomycota	Agaricomycetes	Boletales	Paxillaceae	Paxillus	Paxillus rubicundulus	930991
tr|A0A0D0E2R1|A0A0D0E2R1_9HOMO	A0A0D0E2R1	HS	Pseudo	148		NA	1	0	p20[7:154]	638	No	No	Paxillus rubicundulus Ve08.2h10	Basidiomycota	Eukaryota	Fungi	Basidiomycota	Agaricomycetes	Boletales	Paxillaceae	Paxillus	Paxillus rubicundulus	930991
tr|A0A0D0E5H4|A0A0D0E5H4_9HOMO	A0A0D0E5H4	HC	True	160		NA	1	0	p20[17:176]	417	No	No	Paxillus rubicundulus Ve08.2h10	Basidiomycota	Eukaryota	Fungi	Basidiomycota	Agaricomycetes	Boletales	Paxillaceae	Paxillus	Paxillus rubicundulus	930991
tr|A0A1C7M5Y2|A0A1C7M5Y2_GRIFR	A0A1C7M5Y2	HC	True	179		NA	1	0	p20[601:776]	1438	No	No	Grifola frondosa	Basidiomycota	Eukaryota	Fungi	Basidiomycota	Agaricomycetes	Polyporales	Grifolaceae	Grifola	Grifola frondosa	5627
tr|A0A1C7LSZ8|A0A1C7LSZ8_GRIFR	A0A1C7LSZ8	HC	True	180		NA	1	0	p20[7:186]	332	No	No	Grifola frondosa	Basidiomycota	Eukaryota	Fungi	Basidiomycota	Agaricomycetes	Polyporales	Grifolaceae	Grifola	Grifola frondosa	5627
tr|A0A1C7LSQ9|A0A1C7LSQ9_GRIFR	A0A1C7LSQ9	HC	True	172		NA	1	0	p20[94:265]	402	No	No	Grifola frondosa	Basidiomycota	Eukaryota	Fungi	Basidiomycota	Agaricomycetes	Polyporales	Grifolaceae	Grifola	Grifola frondosa	5627
tr|H1VUI6|H1VUI6_COLHI	H1VUI6	HC	True	159		NA	1	0	p20[127:284]	404	No	No	Colletotrichum higginsianum IMI 349063	Ascomycota	Eukaryota	Fungi	Ascomycota	Sordariomycetes	Glomerellales	Glomerellaceae	Colletotrichum	Colletotrichum higginsianum	759273
tr|H1VPG9|H1VPG9_COLHI	H1VPG9	HC	True	151		NA	1	0	p20[172:322]	327	No	No	Colletotrichum higginsianum IMI 349063	Ascomycota	Eukaryota	Fungi	Ascomycota	Sordariomycetes	Glomerellales	Glomerellaceae	Colletotrichum	Colletotrichum higginsianum	759273
tr|A0A1C7LN20|A0A1C7LN20_GRIFR	A0A1C7LN20	HC	True	192		NA	1	0	p20[21:212]	395	No	No	Grifola frondosa	Basidiomycota	Eukaryota	Fungi	Basidiomycota	Agaricomycetes	Polyporales	Grifolaceae	Grifola	Grifola frondosa	5627
tr|A0A080WJ06|A0A080WJ06_TRIRC	A0A080WJ06	HC	True	154		NA	1	0	p20[154:306]	315	No	No	Trichophyton rubrum CBS 118892	Ascomycota	Eukaryota	Fungi	Ascomycota	Eurotiomycetes	Onygenales	Arthrodermataceae	Trichophyton	Trichophyton rubrum	559305
tr|A0A080WQM1|A0A080WQM1_TRIRC	A0A080WQM1	HC	True	160		NA	1	0	p20[154:313]	392	No	No	Trichophyton rubrum CBS 118892	Ascomycota	Eukaryota	Fungi	Ascomycota	Eurotiomycetes	Onygenales	Arthrodermataceae	Trichophyton	Trichophyton rubrum	559305
tr|B8P0X4|B8P0X4_POSPM	B8P0X4	HC	True	149		NA	1	0	p20[7:154]	652	No	No	Postia placenta Mad-698-R	Basidiomycota	Eukaryota	Fungi	Basidiomycota	Agaricomycetes	Polyporales	Dacryobolaceae	Postia	Postia placenta	561896
tr|B8P0D8|B8P0D8_POSPM	B8P0D8	HC	True	187		NA	1	0	p20[10:196]	317	No	No	Postia placenta Mad-698-R	Basidiomycota	Eukaryota	Fungi	Basidiomycota	Agaricomycetes	Polyporales	Dacryobolaceae	Postia	Postia placenta	561896
tr|M2SST8|M2SST8_COCH5	M2SST8	HC	True	156		NA	1	0	p20[4:159]	657	No	No	Bipolaris maydis C5	Ascomycota	Eukaryota	Fungi	Ascomycota	Dothideomycetes	Pleosporales	Pleosporaceae	Bipolaris	Bipolaris maydis	701091
tr|A0A0D2D684|A0A0D2D684_9EURO	A0A0D2D684	HC	True	175		NA	1	0	p20[9:183]	672	No	No	Exophiala xenobiotica	Ascomycota	Eukaryota	Fungi	Ascomycota	Eurotiomycetes	Chaetothyriales	Herpotrichiellaceae	Exophiala	Exophiala xenobiotica	348802
tr|B8PM95|B8PM95_POSPM	B8PM95	KC	Pseudo	184		NA	1	0	p20[10:193]	430	No	No	Postia placenta Mad-698-R	Basidiomycota	Eukaryota	Fungi	Basidiomycota	Agaricomycetes	Polyporales	Dacryobolaceae	Postia	Postia placenta	561896
tr|B8P0E0|B8P0E0_POSPM	B8P0E0	HC	True	181		NA	1	0	p20[22:202]	322	No	No	Postia placenta Mad-698-R	Basidiomycota	Eukaryota	Fungi	Basidiomycota	Agaricomycetes	Polyporales	Dacryobolaceae	Postia	Postia placenta	561896
tr|A0A067Q7B2|A0A067Q7B2_9HOMO	A0A067Q7B2	RC	Pseudo	151		NA	1	0	p20[7:157]	688	No	No	Jaapia argillacea MUCL 33604	Basidiomycota	Eukaryota	Fungi	Basidiomycota	Agaricomycetes	Jaapiales	Jaapiaceae	Jaapia	Jaapia argillacea	933084
tr|A0A067Q1V1|A0A067Q1V1_9HOMO	A0A067Q1V1	YC	Pseudo	152		NA	1	0	p20[35:186]	675	No	No	Jaapia argillacea MUCL 33604	Basidiomycota	Eukaryota	Fungi	Basidiomycota	Agaricomycetes	Jaapiales	Jaapiaceae	Jaapia	Jaapia argillacea	933084
tr|A0A067PC28|A0A067PC28_9HOMO	A0A067PC28	HC	True	147		NA	1	0	p20[57:203]	696	No	No	Jaapia argillacea MUCL 33604	Basidiomycota	Eukaryota	Fungi	Basidiomycota	Agaricomycetes	Jaapiales	Jaapiaceae	Jaapia	Jaapia argillacea	933084
tr|A0A067PJV6|A0A067PJV6_9HOMO	A0A067PJV6	YC	Pseudo	164		NA	1	0	p20[91:243]	712	No	No	Jaapia argillacea MUCL 33604	Basidiomycota	Eukaryota	Fungi	Basidiomycota	Agaricomycetes	Jaapiales	Jaapiaceae	Jaapia	Jaapia argillacea	933084
tr|A0A2P2H8R5|A0A2P2H8R5_ASPFA	A0A2P2H8R5	HC	True	153		NA	1	0	p20[4:156]	812	No	No	Aspergillus flavus AF70	Ascomycota	Eukaryota	Fungi	Ascomycota	Eurotiomycetes	Eurotiales	Aspergillaceae	Aspergillus	Aspergillus flavus	1392242
tr|A0A067QF95|A0A067QF95_9HOMO	A0A067QF95	HC	True	173		NA	1	0	p20[5:177]	721	No	No	Jaapia argillacea MUCL 33604	Basidiomycota	Eukaryota	Fungi	Basidiomycota	Agaricomycetes	Jaapiales	Jaapiaceae	Jaapia	Jaapia argillacea	933084
tr|A0A067PHD4|A0A067PHD4_9HOMO	A0A067PHD4	HC	True	157		NA	1	0	p20[75:228]	515	No	No	Jaapia argillacea MUCL 33604	Basidiomycota	Eukaryota	Fungi	Basidiomycota	Agaricomycetes	Jaapiales	Jaapiaceae	Jaapia	Jaapia argillacea	933084
tr|A0A067P5C5|A0A067P5C5_9HOMO	A0A067P5C5	HC	True	145		NA	1	0	p20[10:154]	665	No	No	Jaapia argillacea MUCL 33604	Basidiomycota	Eukaryota	Fungi	Basidiomycota	Agaricomycetes	Jaapiales	Jaapiaceae	Jaapia	Jaapia argillacea	933084
tr|A0A067PWT6|A0A067PWT6_9HOMO	A0A067PWT6	HC	True	145		NA	1	0	p20[23:167]	689	No	No	Jaapia argillacea MUCL 33604	Basidiomycota	Eukaryota	Fungi	Basidiomycota	Agaricomycetes	Jaapiales	Jaapiaceae	Jaapia	Jaapia argillacea	933084
tr|A0A067PH56|A0A067PH56_9HOMO	A0A067PH56	HC	True	167		NA	1	0	p20[25:179]	469	No	No	Jaapia argillacea MUCL 33604	Basidiomycota	Eukaryota	Fungi	Basidiomycota	Agaricomycetes	Jaapiales	Jaapiaceae	Jaapia	Jaapia argillacea	933084
tr|A0A067PF56|A0A067PF56_9HOMO	A0A067PF56	HC	True	158		NA	1	0	p20[32:187]	677	No	No	Jaapia argillacea MUCL 33604	Basidiomycota	Eukaryota	Fungi	Basidiomycota	Agaricomycetes	Jaapiales	Jaapiaceae	Jaapia	Jaapia argillacea	933084
tr|A0A067QC57|A0A067QC57_9HOMO	A0A067QC57	HC	True	187		NA	1	0	p20[43:229]	693	No	No	Jaapia argillacea MUCL 33604	Basidiomycota	Eukaryota	Fungi	Basidiomycota	Agaricomycetes	Jaapiales	Jaapiaceae	Jaapia	Jaapia argillacea	933084
tr|A0A2H3JBF2|A0A2H3JBF2_WOLCO	A0A2H3JBF2	HC	True	154		NA	1	0	p20[110:263]	754	No	No	Wolfiporia cocos MD-104 SS10	Basidiomycota	Eukaryota	Fungi	Basidiomycota	Agaricomycetes	Polyporales	Laetiporaceae	Wolfiporia	Wolfiporia cocos	742152
tr|A0A2H3JMF3|A0A2H3JMF3_WOLCO	A0A2H3JMF3	HC	True	148		NA	1	0	p20[7:154]	637	No	No	Wolfiporia cocos MD-104 SS10	Basidiomycota	Eukaryota	Fungi	Basidiomycota	Agaricomycetes	Polyporales	Laetiporaceae	Wolfiporia	Wolfiporia cocos	742152
tr|A0A2H3IYF1|A0A2H3IYF1_WOLCO	A0A2H3IYF1	HC	True	192		NA	1	0	p20[21:212]	429	No	No	Wolfiporia cocos MD-104 SS10	Basidiomycota	Eukaryota	Fungi	Basidiomycota	Agaricomycetes	Polyporales	Laetiporaceae	Wolfiporia	Wolfiporia cocos	742152
tr|A0A2H3IZ10|A0A2H3IZ10_WOLCO	A0A2H3IZ10	HC	True	180		NA	1	0	p20[10:187]	331	No	No	Wolfiporia cocos MD-104 SS10	Basidiomycota	Eukaryota	Fungi	Basidiomycota	Agaricomycetes	Polyporales	Laetiporaceae	Wolfiporia	Wolfiporia cocos	742152
tr|A0A2H3J908|A0A2H3J908_WOLCO	A0A2H3J908	HC	True	161		NA	1	0	p20[2:160]	306	No	No	Wolfiporia cocos MD-104 SS10	Basidiomycota	Eukaryota	Fungi	Basidiomycota	Agaricomycetes	Polyporales	Laetiporaceae	Wolfiporia	Wolfiporia cocos	742152
tr|A0A2H3JGF1|A0A2H3JGF1_WOLCO	A0A2H3JGF1	HC	True	165		NA	1	0	p20[17:180]	384	No	No	Wolfiporia cocos MD-104 SS10	Basidiomycota	Eukaryota	Fungi	Basidiomycota	Agaricomycetes	Polyporales	Laetiporaceae	Wolfiporia	Wolfiporia cocos	742152
tr|A0A2H3JC33|A0A2H3JC33_WOLCO	A0A2H3JC33	HC	True	181		NA	1	0	p20[53:233]	370	No	No	Wolfiporia cocos MD-104 SS10	Basidiomycota	Eukaryota	Fungi	Basidiomycota	Agaricomycetes	Polyporales	Laetiporaceae	Wolfiporia	Wolfiporia cocos	742152
tr|A0A2H3J0K4|A0A2H3J0K4_WOLCO	A0A2H3J0K4	HC	True	190		NA	1	0	p20[60:249]	379	No	No	Wolfiporia cocos MD-104 SS10	Basidiomycota	Eukaryota	Fungi	Basidiomycota	Agaricomycetes	Polyporales	Laetiporaceae	Wolfiporia	Wolfiporia cocos	742152
tr|A0A2H3IZ79|A0A2H3IZ79_WOLCO	A0A2H3IZ79	HC	True	187		NA	1	0	p20[10:193]	543	No	No	Wolfiporia cocos MD-104 SS10	Basidiomycota	Eukaryota	Fungi	Basidiomycota	Agaricomycetes	Polyporales	Laetiporaceae	Wolfiporia	Wolfiporia cocos	742152
tr|A0A2H3JGE2|A0A2H3JGE2_WOLCO	A0A2H3JGE2	HC	True	156		NA	1	0	p20[156:308]	461	No	No	Wolfiporia cocos MD-104 SS10	Basidiomycota	Eukaryota	Fungi	Basidiomycota	Agaricomycetes	Polyporales	Laetiporaceae	Wolfiporia	Wolfiporia cocos	742152
tr|R7SQN6|R7SQN6_DICSQ	R7SQN6	HC	True	187		NA	1	0	p20[35:216]	450	No	No	Dichomitus squalens LYAD-421 SS1	Basidiomycota	Eukaryota	Fungi	Basidiomycota	Agaricomycetes	Polyporales	Polyporaceae	Dichomitus	Dichomitus squalens	732165
tr|R7SSG8|R7SSG8_DICSQ	R7SSG8	HC	True	194		NA	1	0	p20[13:206]	289	No	No	Dichomitus squalens LYAD-421 SS1	Basidiomycota	Eukaryota	Fungi	Basidiomycota	Agaricomycetes	Polyporales	Polyporaceae	Dichomitus	Dichomitus squalens	732165
tr|R7SQA3|R7SQA3_DICSQ	R7SQA3	HC	True	167		NA	1	0	p20[11:177]	338	No	No	Dichomitus squalens LYAD-421 SS1	Basidiomycota	Eukaryota	Fungi	Basidiomycota	Agaricomycetes	Polyporales	Polyporaceae	Dichomitus	Dichomitus squalens	732165
tr|A0A1B7MHX3|A0A1B7MHX3_9HOMO	A0A1B7MHX3	HC	True	182		NA	1	0	p20[15:190]	377	No	No	Rhizopogon vinicolor AM-OR11-026	Basidiomycota	Eukaryota	Fungi	Basidiomycota	Agaricomycetes	Boletales	Rhizopogonaceae	Rhizopogon	Rhizopogon vinicolor	1314800
tr|A0A0D1YUZ6|A0A0D1YUZ6_9EURO	A0A0D1YUZ6	HC	True	155		NA	1	0	p20[13:167]	262	No	No	Exophiala spinifera	Ascomycota	Eukaryota	Fungi	Ascomycota	Eurotiomycetes	Chaetothyriales	Herpotrichiellaceae	Exophiala	Exophiala spinifera	91928
tr|A0A0D2C6B7|A0A0D2C6B7_9EURO	A0A0D2C6B7	HC	True	163		NA	1	0	p20[3:165]	654	No	No	Exophiala spinifera	Ascomycota	Eukaryota	Fungi	Ascomycota	Eurotiomycetes	Chaetothyriales	Herpotrichiellaceae	Exophiala	Exophiala spinifera	91928
tr|A0A0W0F8E4|A0A0W0F8E4_9AGAR	A0A0W0F8E4	HC	True	184		NA	1	0	p20[102:285]	527	No	No	Moniliophthora roreri	Basidiomycota	Eukaryota	Fungi	Basidiomycota	Agaricomycetes	Agaricales	Marasmiaceae	Moniliophthora	Moniliophthora roreri	221103
tr|A0A1B7MUI0|A0A1B7MUI0_9HOMO	A0A1B7MUI0	HC	True	153		NA	1	0	p20[46:198]	291	No	No	Rhizopogon vinicolor AM-OR11-026	Basidiomycota	Eukaryota	Fungi	Basidiomycota	Agaricomycetes	Boletales	Rhizopogonaceae	Rhizopogon	Rhizopogon vinicolor	1314800
tr|E2LS59|E2LS59_MONPE	E2LS59	HC	True	150		NA	1	0	p20[7:156]	177	No	No	Moniliophthora perniciosa FA553	Basidiomycota	Eukaryota	Fungi	Basidiomycota	Agaricomycetes	Agaricales	Marasmiaceae	Moniliophthora	Moniliophthora perniciosa	554373
tr|A0A0W0F0B2|A0A0W0F0B2_9AGAR	A0A0W0F0B2	HC	True	150		NA	1	0	p20[7:156]	451	No	No	Moniliophthora roreri	Basidiomycota	Eukaryota	Fungi	Basidiomycota	Agaricomycetes	Agaricales	Marasmiaceae	Moniliophthora	Moniliophthora roreri	221103
tr|A0A0W0EU53|A0A0W0EU53_9AGAR	A0A0W0EU53	VC	Pseudo	178		NA	1	0	p20[353:530]	949	No	No	Moniliophthora roreri	Basidiomycota	Eukaryota	Fungi	Basidiomycota	Agaricomycetes	Agaricales	Marasmiaceae	Moniliophthora	Moniliophthora roreri	221103
tr|A0A1B7MDS0|A0A1B7MDS0_9HOMO	A0A1B7MDS0	HC	True	148		NA	1	0	p20[10:157]	197	No	No	Rhizopogon vinicolor AM-OR11-026	Basidiomycota	Eukaryota	Fungi	Basidiomycota	Agaricomycetes	Boletales	Rhizopogonaceae	Rhizopogon	Rhizopogon vinicolor	1314800
tr|A0A1B7N2N3|A0A1B7N2N3_9HOMO	A0A1B7N2N3	HC	True	154		NA	1	0	p20[7:160]	652	No	No	Rhizopogon vinicolor AM-OR11-026	Basidiomycota	Eukaryota	Fungi	Basidiomycota	Agaricomycetes	Boletales	Rhizopogonaceae	Rhizopogon	Rhizopogon vinicolor	1314800
tr|A0A318ZIW2|A0A318ZIW2_9EURO	A0A318ZIW2	HC	True	159		NA	1	0	p20[11:169]	671	No	No	Aspergillus saccharolyticus JOP 1030-1	Ascomycota	Eukaryota	Fungi	Ascomycota	Eurotiomycetes	Eurotiales	Aspergillaceae	Aspergillus	Aspergillus saccharolyticus	1450539
tr|A0A286U743|A0A286U743_9HOMO	A0A286U743	HC	True	200		NA	1	0	p20[21:220]	449	No	No	Pyrrhoderma noxium	Basidiomycota	Eukaryota	Fungi	Basidiomycota	Agaricomycetes	Hymenochaetales	Hymenochaetaceae	Pyrrhoderma	Pyrrhoderma noxium	2282107
tr|A0A286U791|A0A286U791_9HOMO	A0A286U791	HC	True	185		NA	1	0	p20[21:205]	352	No	No	Pyrrhoderma noxium	Basidiomycota	Eukaryota	Fungi	Basidiomycota	Agaricomycetes	Hymenochaetales	Hymenochaetaceae	Pyrrhoderma	Pyrrhoderma noxium	2282107
tr|A0A286U754|A0A286U754_9HOMO	A0A286U754	HC	True	181		NA	2	0	p20[11:217]-p20[447:641]	876	No	No	Pyrrhoderma noxium	Basidiomycota	Eukaryota	Fungi	Basidiomycota	Agaricomycetes	Hymenochaetales	Hymenochaetaceae	Pyrrhoderma	Pyrrhoderma noxium	2282107
tr|A0A286UXD9|A0A286UXD9_9HOMO	A0A286UXD9	HC	True	157		NA	1	0	p20[166:322]	395	No	No	Pyrrhoderma noxium	Basidiomycota	Eukaryota	Fungi	Basidiomycota	Agaricomycetes	Hymenochaetales	Hymenochaetaceae	Pyrrhoderma	Pyrrhoderma noxium	2282107
tr|A0A319CNP5|A0A319CNP5_9EURO	A0A319CNP5	HC	True	130		NA	1	0	p20[22:151]	595	No	No	Aspergillus uvarum CBS 121591	Ascomycota	Eukaryota	Fungi	Ascomycota	Eurotiomycetes	Eurotiales	Aspergillaceae	Aspergillus	Aspergillus uvarum	1448315
tr|A0A319BZW1|A0A319BZW1_9EURO	A0A319BZW1	HC	True	169		NA	1	0	p20[159:327]	403	No	No	Aspergillus uvarum CBS 121591	Ascomycota	Eukaryota	Fungi	Ascomycota	Eurotiomycetes	Eurotiales	Aspergillaceae	Aspergillus	Aspergillus uvarum	1448315
tr|K5XZ23|K5XZ23_AGABU	K5XZ23	HC	True	157		NA	1	0	p20[7:163]	643	No	No	Agaricus bisporus var. burnettii JB137-S8	Basidiomycota	Eukaryota	Fungi	Basidiomycota	Agaricomycetes	Agaricales	Agaricaceae	Agaricus	Agaricus bisporus	597362
tr|K5VKY0|K5VKY0_AGABU	K5VKY0	HC	True	146		NA	1	0	p20[1:142]	329	No	No	Agaricus bisporus var. burnettii JB137-S8	Basidiomycota	Eukaryota	Fungi	Basidiomycota	Agaricomycetes	Agaricales	Agaricaceae	Agaricus	Agaricus bisporus	597362
tr|K5VLL3|K5VLL3_AGABU	K5VLL3	HC	True	182		NA	1	0	p20[171:340]	493	No	No	Agaricus bisporus var. burnettii JB137-S8	Basidiomycota	Eukaryota	Fungi	Basidiomycota	Agaricomycetes	Agaricales	Agaricaceae	Agaricus	Agaricus bisporus	597362
tr|G9NBE2|G9NBE2_HYPVG	G9NBE2	FG	Pseudo	151		NA	1	0	p20[127:276]	685	No	No	Trichoderma virens Gv29-8	Ascomycota	Eukaryota	Fungi	Ascomycota	Sordariomycetes	Hypocreales	Hypocreaceae	Trichoderma	Trichoderma virens	413071
tr|K5W5Q2|K5W5Q2_AGABU	K5W5Q2	HC	True	168		NA	1	0	p20[22:189]	500	No	No	Agaricus bisporus var. burnettii JB137-S8	Basidiomycota	Eukaryota	Fungi	Basidiomycota	Agaricomycetes	Agaricales	Agaricaceae	Agaricus	Agaricus bisporus	597362
tr|K5X727|K5X727_AGABU	K5X727	HC	True	169		NA	1	0	p20[9:177]	194	No	No	Agaricus bisporus var. burnettii JB137-S8	Basidiomycota	Eukaryota	Fungi	Basidiomycota	Agaricomycetes	Agaricales	Agaricaceae	Agaricus	Agaricus bisporus	597362
tr|K5WW66|K5WW66_AGABU	K5WW66	HC	True	192		NA	1	0	p20[152:343]	492	No	No	Agaricus bisporus var. burnettii JB137-S8	Basidiomycota	Eukaryota	Fungi	Basidiomycota	Agaricomycetes	Agaricales	Agaricaceae	Agaricus	Agaricus bisporus	597362
tr|K5XL94|K5XL94_AGABU	K5XL94	HC	True	179		NA	1	0	p20[171:344]	531	No	No	Agaricus bisporus var. burnettii JB137-S8	Basidiomycota	Eukaryota	Fungi	Basidiomycota	Agaricomycetes	Agaricales	Agaricaceae	Agaricus	Agaricus bisporus	597362
tr|A2QWJ3|A2QWJ3_ASPNC	A2QWJ3	HC	True	152		NA	1	0	p20[1345:1489]	1966	No	No	Aspergillus niger CBS 513.88	Ascomycota	Eukaryota	Fungi	Ascomycota	Eurotiomycetes	Eurotiales	Aspergillaceae	Aspergillus	Aspergillus niger	425011
tr|A0A094EUS6|A0A094EUS6_9PEZI	A0A094EUS6	HC	True	141		NA	1	0	p20[82:222]	500	No	No	Pseudogymnoascus sp. VKM F-103	Ascomycota	Eukaryota	Fungi	Ascomycota	Leotiomycetes	NA	Pseudeurotiaceae	Pseudogymnoascus	Pseudogymnoascus sp. VKM F-103	1420912
tr|A0A166J1U5|A0A166J1U5_9HOMO	A0A166J1U5	HC	True	142		NA	1	0	p20[44:180]	692	No	No	Peniophora sp. CONT	Basidiomycota	Eukaryota	Fungi	Basidiomycota	Agaricomycetes	Russulales	Peniophoraceae	Peniophora	Peniophora sp. CONT	1314672
tr|A0A166J1T8|A0A166J1T8_9HOMO	A0A166J1T8	YC	Pseudo	159		NA	1	0	p20[74:232]	727	No	No	Peniophora sp. CONT	Basidiomycota	Eukaryota	Fungi	Basidiomycota	Agaricomycetes	Russulales	Peniophoraceae	Peniophora	Peniophora sp. CONT	1314672
tr|A0A166LS07|A0A166LS07_9HOMO	A0A166LS07	HC	True	185		NA	1	0	p20[61:243]	734	No	No	Peniophora sp. CONT	Basidiomycota	Eukaryota	Fungi	Basidiomycota	Agaricomycetes	Russulales	Peniophoraceae	Peniophora	Peniophora sp. CONT	1314672
tr|A0A166J1V8|A0A166J1V8_9HOMO	A0A166J1V8	HC	True	168		NA	1	0	p20[56:223]	705	No	No	Peniophora sp. CONT	Basidiomycota	Eukaryota	Fungi	Basidiomycota	Agaricomycetes	Russulales	Peniophoraceae	Peniophora	Peniophora sp. CONT	1314672
tr|A0A0C3NRU2|A0A0C3NRU2_PHLGI	A0A0C3NRU2	HC	True	169		NA	1	0	p20[3:171]	289	No	No	Phlebiopsis gigantea 11061_1 CR5-6	Basidiomycota	Eukaryota	Fungi	Basidiomycota	Agaricomycetes	Polyporales	Phanerochaetaceae	Phlebiopsis	Phlebiopsis gigantea	745531
tr|A0A165ZR31|A0A165ZR31_9HOMO	A0A165ZR31	HC	True	163		NA	1	0	p20[66:222]	722	No	No	Peniophora sp. CONT	Basidiomycota	Eukaryota	Fungi	Basidiomycota	Agaricomycetes	Russulales	Peniophoraceae	Peniophora	Peniophora sp. CONT	1314672
tr|A0A0C3PW19|A0A0C3PW19_PHLGI	A0A0C3PW19	HC	True	170		NA	1	0	p20[20:188]	237	No	No	Phlebiopsis gigantea 11061_1 CR5-6	Basidiomycota	Eukaryota	Fungi	Basidiomycota	Agaricomycetes	Polyporales	Phanerochaetaceae	Phlebiopsis	Phlebiopsis gigantea	745531
tr|A0A165YX32|A0A165YX32_9HOMO	A0A165YX32	HC	True	174		NA	1	0	p20[39:208]	807	No	No	Peniophora sp. CONT	Basidiomycota	Eukaryota	Fungi	Basidiomycota	Agaricomycetes	Russulales	Peniophoraceae	Peniophora	Peniophora sp. CONT	1314672
tr|A0A0C3SD82|A0A0C3SD82_PHLGI	A0A0C3SD82	HC	True	160		NA	1	0	p20[7:165]	648	No	No	Phlebiopsis gigantea 11061_1 CR5-6	Basidiomycota	Eukaryota	Fungi	Basidiomycota	Agaricomycetes	Polyporales	Phanerochaetaceae	Phlebiopsis	Phlebiopsis gigantea	745531
tr|A0A165WJN4|A0A165WJN4_9HOMO	A0A165WJN4	HC	True	165		NA	1	0	p20[23:187]	676	No	No	Peniophora sp. CONT	Basidiomycota	Eukaryota	Fungi	Basidiomycota	Agaricomycetes	Russulales	Peniophoraceae	Peniophora	Peniophora sp. CONT	1314672
tr|A0A165WR45|A0A165WR45_9HOMO	A0A165WR45	HC	True	164		NA	1	0	p20[166:329]	849	No	No	Peniophora sp. CONT	Basidiomycota	Eukaryota	Fungi	Basidiomycota	Agaricomycetes	Russulales	Peniophoraceae	Peniophora	Peniophora sp. CONT	1314672
tr|A0A0C3RVG2|A0A0C3RVG2_PHLGI	A0A0C3RVG2	HR	Pseudo	142		NA	1	0	p20[181:320]	382	No	No	Phlebiopsis gigantea 11061_1 CR5-6	Basidiomycota	Eukaryota	Fungi	Basidiomycota	Agaricomycetes	Polyporales	Phanerochaetaceae	Phlebiopsis	Phlebiopsis gigantea	745531
tr|A0A166IW18|A0A166IW18_9HOMO	A0A166IW18	HC	True	160		NA	1	0	p20[54:211]	744	No	No	Peniophora sp. CONT	Basidiomycota	Eukaryota	Fungi	Basidiomycota	Agaricomycetes	Russulales	Peniophoraceae	Peniophora	Peniophora sp. CONT	1314672
tr|A0A165ZQU0|A0A165ZQU0_9HOMO	A0A165ZQU0	HC	True	156		NA	1	0	p20[8:163]	661	No	No	Peniophora sp. CONT	Basidiomycota	Eukaryota	Fungi	Basidiomycota	Agaricomycetes	Russulales	Peniophoraceae	Peniophora	Peniophora sp. CONT	1314672
tr|A0A165WWI6|A0A165WWI6_9HOMO	A0A165WWI6	HC	True	164		NA	1	0	p20[108:263]	766	No	No	Peniophora sp. CONT	Basidiomycota	Eukaryota	Fungi	Basidiomycota	Agaricomycetes	Russulales	Peniophoraceae	Peniophora	Peniophora sp. CONT	1314672
tr|A0A166B7L7|A0A166B7L7_9HOMO	A0A166B7L7	FS	Pseudo	184		NA	1	0	p20[18:201]	322	No	No	Peniophora sp. CONT	Basidiomycota	Eukaryota	Fungi	Basidiomycota	Agaricomycetes	Russulales	Peniophoraceae	Peniophora	Peniophora sp. CONT	1314672
tr|A0A165WWG8|A0A165WWG8_9HOMO	A0A165WWG8	HC	True	146		NA	1	0	p20[52:197]	489	No	No	Peniophora sp. CONT	Basidiomycota	Eukaryota	Fungi	Basidiomycota	Agaricomycetes	Russulales	Peniophoraceae	Peniophora	Peniophora sp. CONT	1314672
tr|A0A165Z740|A0A165Z740_9HOMO	A0A165Z740	HC	True	196		NA	1	0	p20[37:232]	690	No	No	Peniophora sp. CONT	Basidiomycota	Eukaryota	Fungi	Basidiomycota	Agaricomycetes	Russulales	Peniophoraceae	Peniophora	Peniophora sp. CONT	1314672
tr|A0A166KWR7|A0A166KWR7_9HOMO	A0A166KWR7	HC	True	154		NA	1	0	p20[48:198]	721	No	No	Peniophora sp. CONT	Basidiomycota	Eukaryota	Fungi	Basidiomycota	Agaricomycetes	Russulales	Peniophoraceae	Peniophora	Peniophora sp. CONT	1314672
tr|A0A166L817|A0A166L817_9HOMO	A0A166L817	HC	True	163		NA	1	0	p20[83:244]	513	No	No	Peniophora sp. CONT	Basidiomycota	Eukaryota	Fungi	Basidiomycota	Agaricomycetes	Russulales	Peniophoraceae	Peniophora	Peniophora sp. CONT	1314672
tr|A0A165ZME7|A0A165ZME7_9HOMO	A0A165ZME7	YC	Pseudo	151		NA	1	0	p20[62:212]	733	No	No	Peniophora sp. CONT	Basidiomycota	Eukaryota	Fungi	Basidiomycota	Agaricomycetes	Russulales	Peniophoraceae	Peniophora	Peniophora sp. CONT	1314672
tr|A0A165Z9T1|A0A165Z9T1_9HOMO	A0A165Z9T1	HC	True	170		NA	1	0	p20[70:239]	731	No	No	Peniophora sp. CONT	Basidiomycota	Eukaryota	Fungi	Basidiomycota	Agaricomycetes	Russulales	Peniophoraceae	Peniophora	Peniophora sp. CONT	1314672
tr|A0A166DL96|A0A166DL96_9HOMO	A0A166DL96	HC	True	169		NA	1	0	p20[44:211]	703	No	No	Peniophora sp. CONT	Basidiomycota	Eukaryota	Fungi	Basidiomycota	Agaricomycetes	Russulales	Peniophoraceae	Peniophora	Peniophora sp. CONT	1314672
tr|A0A0C3RRM5|A0A0C3RRM5_PHLGI	A0A0C3RRM5	HC	True	171		NA	1	0	p20[3:165]	266	No	No	Phlebiopsis gigantea 11061_1 CR5-6	Basidiomycota	Eukaryota	Fungi	Basidiomycota	Agaricomycetes	Polyporales	Phanerochaetaceae	Phlebiopsis	Phlebiopsis gigantea	745531
tr|A0A0C3S100|A0A0C3S100_PHLGI	A0A0C3S100	HC	True	153		NA	1	0	p20[58:205]	444	No	No	Phlebiopsis gigantea 11061_1 CR5-6	Basidiomycota	Eukaryota	Fungi	Basidiomycota	Agaricomycetes	Polyporales	Phanerochaetaceae	Phlebiopsis	Phlebiopsis gigantea	745531
tr|A0A165ZR68|A0A165ZR68_9HOMO	A0A165ZR68	HC	True	188		NA	1	0	p20[68:255]	730	No	No	Peniophora sp. CONT	Basidiomycota	Eukaryota	Fungi	Basidiomycota	Agaricomycetes	Russulales	Peniophoraceae	Peniophora	Peniophora sp. CONT	1314672
tr|A0A165XDA2|A0A165XDA2_9HOMO	A0A165XDA2	HC	True	150		NA	1	0	p20[49:198]	718	No	No	Peniophora sp. CONT	Basidiomycota	Eukaryota	Fungi	Basidiomycota	Agaricomycetes	Russulales	Peniophoraceae	Peniophora	Peniophora sp. CONT	1314672
tr|A0A166CK57|A0A166CK57_9HOMO	A0A166CK57	HC	True	151		NA	1	0	p20[3:153]	153	No	No	Peniophora sp. CONT	Basidiomycota	Eukaryota	Fungi	Basidiomycota	Agaricomycetes	Russulales	Peniophoraceae	Peniophora	Peniophora sp. CONT	1314672
tr|A0A165Z715|A0A165Z715_9HOMO	A0A165Z715	YC	Pseudo	170		NA	1	0	p20[392:559]	1058	No	No	Peniophora sp. CONT	Basidiomycota	Eukaryota	Fungi	Basidiomycota	Agaricomycetes	Russulales	Peniophoraceae	Peniophora	Peniophora sp. CONT	1314672
tr|A0A166J1U8|A0A166J1U8_9HOMO	A0A166J1U8	HC	True	162		NA	1	0	p20[76:237]	722	No	No	Peniophora sp. CONT	Basidiomycota	Eukaryota	Fungi	Basidiomycota	Agaricomycetes	Russulales	Peniophoraceae	Peniophora	Peniophora sp. CONT	1314672
tr|A0A166KWI4|A0A166KWI4_9HOMO	A0A166KWI4	HC	True	175		NA	1	0	p20[8:180]	717	No	No	Peniophora sp. CONT	Basidiomycota	Eukaryota	Fungi	Basidiomycota	Agaricomycetes	Russulales	Peniophoraceae	Peniophora	Peniophora sp. CONT	1314672
tr|A0A165Y0L5|A0A165Y0L5_9HOMO	A0A165Y0L5	HC	True	177		NA	1	0	p20[27:202]	663	No	No	Peniophora sp. CONT	Basidiomycota	Eukaryota	Fungi	Basidiomycota	Agaricomycetes	Russulales	Peniophoraceae	Peniophora	Peniophora sp. CONT	1314672
tr|A0A166CFU2|A0A166CFU2_9HOMO	A0A166CFU2	HC	True	186		NA	1	0	p20[360:542]	1030	No	No	Peniophora sp. CONT	Basidiomycota	Eukaryota	Fungi	Basidiomycota	Agaricomycetes	Russulales	Peniophoraceae	Peniophora	Peniophora sp. CONT	1314672
tr|A0A166L827|A0A166L827_9HOMO	A0A166L827	HC	True	146		NA	1	0	p20[2:147]	452	No	No	Peniophora sp. CONT	Basidiomycota	Eukaryota	Fungi	Basidiomycota	Agaricomycetes	Russulales	Peniophoraceae	Peniophora	Peniophora sp. CONT	1314672
tr|A0A166ARH9|A0A166ARH9_9HOMO	A0A166ARH9	QS	Pseudo	156		NA	1	0	p20[2:152]	683	No	No	Peniophora sp. CONT	Basidiomycota	Eukaryota	Fungi	Basidiomycota	Agaricomycetes	Russulales	Peniophoraceae	Peniophora	Peniophora sp. CONT	1314672
tr|A0A165X7J7|A0A165X7J7_9HOMO	A0A165X7J7	HC	True	168		NA	1	0	p20[37:199]	716	No	No	Peniophora sp. CONT	Basidiomycota	Eukaryota	Fungi	Basidiomycota	Agaricomycetes	Russulales	Peniophoraceae	Peniophora	Peniophora sp. CONT	1314672
tr|A0A166CA56|A0A166CA56_9HOMO	A0A166CA56	FS	Pseudo	162		NA	1	0	p20[117:278]	428	No	No	Peniophora sp. CONT	Basidiomycota	Eukaryota	Fungi	Basidiomycota	Agaricomycetes	Russulales	Peniophoraceae	Peniophora	Peniophora sp. CONT	1314672
tr|A0A166CA99|A0A166CA99_9HOMO	A0A166CA99	HC	True	166		NA	1	0	p20[157:322]	461	No	No	Peniophora sp. CONT	Basidiomycota	Eukaryota	Fungi	Basidiomycota	Agaricomycetes	Russulales	Peniophoraceae	Peniophora	Peniophora sp. CONT	1314672
tr|A0A166L835|A0A166L835_9HOMO	A0A166L835	HC	True	175		NA	1	0	p20[66:235]	486	No	No	Peniophora sp. CONT	Basidiomycota	Eukaryota	Fungi	Basidiomycota	Agaricomycetes	Russulales	Peniophoraceae	Peniophora	Peniophora sp. CONT	1314672
tr|A0A166IHL3|A0A166IHL3_9HOMO	A0A166IHL3	HC	True	143		NA	1	0	p20[33:174]	435	No	No	Peniophora sp. CONT	Basidiomycota	Eukaryota	Fungi	Basidiomycota	Agaricomycetes	Russulales	Peniophoraceae	Peniophora	Peniophora sp. CONT	1314672
tr|A0A165XT54|A0A165XT54_9HOMO	A0A165XT54	HC	True	186		NA	1	0	p20[35:220]	771	No	No	Peniophora sp. CONT	Basidiomycota	Eukaryota	Fungi	Basidiomycota	Agaricomycetes	Russulales	Peniophoraceae	Peniophora	Peniophora sp. CONT	1314672
tr|A0A165Z3S6|A0A165Z3S6_9HOMO	A0A165Z3S6	YS	Pseudo	162		NA	1	0	p20[134:294]	438	No	No	Peniophora sp. CONT	Basidiomycota	Eukaryota	Fungi	Basidiomycota	Agaricomycetes	Russulales	Peniophoraceae	Peniophora	Peniophora sp. CONT	1314672
tr|A0A0C3NDX6|A0A0C3NDX6_PHLGI	A0A0C3NDX6	HC	True	151		NA	1	0	p20[4:154]	458	No	No	Phlebiopsis gigantea 11061_1 CR5-6	Basidiomycota	Eukaryota	Fungi	Basidiomycota	Agaricomycetes	Polyporales	Phanerochaetaceae	Phlebiopsis	Phlebiopsis gigantea	745531
tr|A0A165ZZ94|A0A165ZZ94_9HOMO	A0A165ZZ94	HC	True	161		NA	1	0	p20[65:225]	729	No	No	Peniophora sp. CONT	Basidiomycota	Eukaryota	Fungi	Basidiomycota	Agaricomycetes	Russulales	Peniophoraceae	Peniophora	Peniophora sp. CONT	1314672
tr|A0A165ZQV9|A0A165ZQV9_9HOMO	A0A165ZQV9	HC	True	158		NA	1	0	p20[73:230]	733	No	No	Peniophora sp. CONT	Basidiomycota	Eukaryota	Fungi	Basidiomycota	Agaricomycetes	Russulales	Peniophoraceae	Peniophora	Peniophora sp. CONT	1314672
tr|A0A166EZZ3|A0A166EZZ3_9HOMO	A0A166EZZ3	HC	True	146		NA	1	0	p20[13:158]	670	No	No	Peniophora sp. CONT	Basidiomycota	Eukaryota	Fungi	Basidiomycota	Agaricomycetes	Russulales	Peniophoraceae	Peniophora	Peniophora sp. CONT	1314672
tr|A0A165ZQV0|A0A165ZQV0_9HOMO	A0A165ZQV0	HC	True	183		NA	1	0	p20[26:198]	693	No	No	Peniophora sp. CONT	Basidiomycota	Eukaryota	Fungi	Basidiomycota	Agaricomycetes	Russulales	Peniophoraceae	Peniophora	Peniophora sp. CONT	1314672
tr|A0A0C3NJZ7|A0A0C3NJZ7_PHLGI	A0A0C3NJZ7	HC	True	173		NA	1	0	p20[141:307]	480	No	No	Phlebiopsis gigantea 11061_1 CR5-6	Basidiomycota	Eukaryota	Fungi	Basidiomycota	Agaricomycetes	Polyporales	Phanerochaetaceae	Phlebiopsis	Phlebiopsis gigantea	745531
tr|A0A166E5V8|A0A166E5V8_9HOMO	A0A166E5V8	HC	True	178		NA	1	0	p20[187:364]	447	No	No	Peniophora sp. CONT	Basidiomycota	Eukaryota	Fungi	Basidiomycota	Agaricomycetes	Russulales	Peniophoraceae	Peniophora	Peniophora sp. CONT	1314672
tr|A0A165ZMD7|A0A165ZMD7_9HOMO	A0A165ZMD7	YS	Pseudo	144		NA	1	0	p20[47:190]	721	No	No	Peniophora sp. CONT	Basidiomycota	Eukaryota	Fungi	Basidiomycota	Agaricomycetes	Russulales	Peniophoraceae	Peniophora	Peniophora sp. CONT	1314672
tr|A0A166L803|A0A166L803_9HOMO	A0A166L803	HC	True	177		NA	1	0	p20[89:265]	500	No	No	Peniophora sp. CONT	Basidiomycota	Eukaryota	Fungi	Basidiomycota	Agaricomycetes	Russulales	Peniophoraceae	Peniophora	Peniophora sp. CONT	1314672
tr|A0A166DVE2|A0A166DVE2_9HOMO	A0A166DVE2	HC	True	194		NA	1	0	p20[20:212]	678	No	No	Peniophora sp. CONT	Basidiomycota	Eukaryota	Fungi	Basidiomycota	Agaricomycetes	Russulales	Peniophoraceae	Peniophora	Peniophora sp. CONT	1314672
tr|A0A165ZJY9|A0A165ZJY9_9HOMO	A0A165ZJY9	HC	True	180		NA	1	0	p20[12:190]	762	No	No	Peniophora sp. CONT	Basidiomycota	Eukaryota	Fungi	Basidiomycota	Agaricomycetes	Russulales	Peniophoraceae	Peniophora	Peniophora sp. CONT	1314672
tr|A0A166BJF7|A0A166BJF7_9HOMO	A0A166BJF7	HC	True	159		NA	1	0	p20[16:174]	683	No	No	Peniophora sp. CONT	Basidiomycota	Eukaryota	Fungi	Basidiomycota	Agaricomycetes	Russulales	Peniophoraceae	Peniophora	Peniophora sp. CONT	1314672
tr|A0A166CA90|A0A166CA90_9HOMO	A0A166CA90	HC	True	174		NA	1	0	p20[283:456]	587	No	No	Peniophora sp. CONT	Basidiomycota	Eukaryota	Fungi	Basidiomycota	Agaricomycetes	Russulales	Peniophoraceae	Peniophora	Peniophora sp. CONT	1314672
tr|A0A166BJI0|A0A166BJI0_9HOMO	A0A166BJI0	HC	True	170		NA	1	0	p20[45:214]	724	No	No	Peniophora sp. CONT	Basidiomycota	Eukaryota	Fungi	Basidiomycota	Agaricomycetes	Russulales	Peniophoraceae	Peniophora	Peniophora sp. CONT	1314672
tr|A0A135LRD8|A0A135LRD8_PENPA	A0A135LRD8	HC	True	157		NA	1	0	p20[5:159]	636	No	No	Penicillium griseofulvum	Ascomycota	Eukaryota	Fungi	Ascomycota	Eurotiomycetes	Eurotiales	Aspergillaceae	Penicillium	Penicillium griseofulvum	5078
tr|A0A2J6PI18|A0A2J6PI18_9HELO	A0A2J6PI18	HC	True	158		NA	1	0	p20[4:161]	284	No	No	Pezoloma ericae	Ascomycota	Eukaryota	Fungi	Ascomycota	Leotiomycetes	Helotiales	Leotiaceae	Pezoloma	Pezoloma ericae	1745343
tr|A0A2J6PSV2|A0A2J6PSV2_9HELO	A0A2J6PSV2	HC	True	178		NA	1	0	p20[64:241]	733	No	No	Pezoloma ericae	Ascomycota	Eukaryota	Fungi	Ascomycota	Leotiomycetes	Helotiales	Leotiaceae	Pezoloma	Pezoloma ericae	1745343
tr|A0A135LCC9|A0A135LCC9_PENPA	A0A135LCC9	HC	True	160		NA	1	0	p20[105:264]	336	No	No	Penicillium griseofulvum	Ascomycota	Eukaryota	Fungi	Ascomycota	Eurotiomycetes	Eurotiales	Aspergillaceae	Penicillium	Penicillium griseofulvum	5078
tr|A0A2S7PVA4|A0A2S7PVA4_9HELO	A0A2S7PVA4	HC	True	157		NA	1	0	p20[11:167]	629	No	No	Rutstroemia sp. NJR-2017a WRK4	Ascomycota	Eukaryota	Fungi	Ascomycota	Leotiomycetes	Helotiales	Rutstroemiaceae	Rutstroemia	Rutstroemia sp. NJR-2017a WRK4	2070412
tr|A0A2U3DS41|A0A2U3DS41_9HYPO	A0A2U3DS41	HC	True	164		NA	1	0	p20[13:165]	632	No	No	Purpureocillium lilacinum	Ascomycota	Eukaryota	Fungi	Ascomycota	Sordariomycetes	Hypocreales	Ophiocordycipitaceae	Purpureocillium	Purpureocillium lilacinum	33203
tr|A0A1L7TX42|A0A1L7TX42_FUSMA	A0A1L7TX42	HC	True	176		NA	1	0	p20[5:180]	830	No	No	Fusarium mangiferae	Ascomycota	Eukaryota	Fungi	Ascomycota	Sordariomycetes	Hypocreales	Nectriaceae	Fusarium	Fusarium mangiferae	192010
tr|A0A179FK52|A0A179FK52_9HYPO	A0A179FK52	HC	True	185		NA	1	0	p20[5:189]	500	No	No	Purpureocillium lilacinum	Ascomycota	Eukaryota	Fungi	Ascomycota	Sordariomycetes	Hypocreales	Ophiocordycipitaceae	Purpureocillium	Purpureocillium lilacinum	33203
tr|A0A1L7TDM6|A0A1L7TDM6_FUSMA	A0A1L7TDM6	HC	True	171		NA	1	0	p20[10:178]	669	No	No	Fusarium mangiferae	Ascomycota	Eukaryota	Fungi	Ascomycota	Sordariomycetes	Hypocreales	Nectriaceae	Fusarium	Fusarium mangiferae	192010
tr|W3X6U6|W3X6U6_PESFW	W3X6U6	HC	True	158		NA	1	0	p20[11:168]	654	No	No	Pestalotiopsis fici W106-1	Ascomycota	Eukaryota	Fungi	Ascomycota	Sordariomycetes	Xylariales	Sporocadaceae	Pestalotiopsis	Pestalotiopsis fici	1229662
tr|A0A0C9VFA9|A0A0C9VFA9_9HOMO	A0A0C9VFA9	HC	True	161		NA	1	0	p20[34:193]	695	No	No	Sphaerobolus stellatus SS14	Basidiomycota	Eukaryota	Fungi	Basidiomycota	Agaricomycetes	Geastrales	Sphaerobolaceae	Sphaerobolus	Sphaerobolus stellatus	990650
tr|A0A0C9UMM4|A0A0C9UMM4_9HOMO	A0A0C9UMM4	HC	True	181		NA	1	0	p20[58:235]	881	No	No	Sphaerobolus stellatus SS14	Basidiomycota	Eukaryota	Fungi	Basidiomycota	Agaricomycetes	Geastrales	Sphaerobolaceae	Sphaerobolus	Sphaerobolus stellatus	990650
tr|A0A0C7CCB8|A0A0C7CCB8_9FUNG	A0A0C7CCB8	HC	True	168		NA	1	0	p20[89:256]	316	No	No	Rhizopus microsporus	Mucoromycota	Eukaryota	Fungi	Mucoromycota	Mucoromycetes	Mucorales	Rhizopodaceae	Rhizopus	Rhizopus microsporus	58291
tr|A0A0C9UQ66|A0A0C9UQ66_9HOMO	A0A0C9UQ66	HC	True	191		NA	1	0	p20[11:200]	428	No	No	Sphaerobolus stellatus SS14	Basidiomycota	Eukaryota	Fungi	Basidiomycota	Agaricomycetes	Geastrales	Sphaerobolaceae	Sphaerobolus	Sphaerobolus stellatus	990650
tr|A0A0C9UJC2|A0A0C9UJC2_9HOMO	A0A0C9UJC2	HC	True	165		NA	1	0	p20[10:174]	347	No	No	Sphaerobolus stellatus SS14	Basidiomycota	Eukaryota	Fungi	Basidiomycota	Agaricomycetes	Geastrales	Sphaerobolaceae	Sphaerobolus	Sphaerobolus stellatus	990650
tr|A0A0C9URW5|A0A0C9URW5_9HOMO	A0A0C9URW5	HC	True	159		NA	1	0	p20[41:192]	658	No	No	Sphaerobolus stellatus SS14	Basidiomycota	Eukaryota	Fungi	Basidiomycota	Agaricomycetes	Geastrales	Sphaerobolaceae	Sphaerobolus	Sphaerobolus stellatus	990650
tr|A0A0C9UIY7|A0A0C9UIY7_9HOMO	A0A0C9UIY7	HC	True	159		NA	1	0	p20[14:172]	377	No	No	Sphaerobolus stellatus SS14	Basidiomycota	Eukaryota	Fungi	Basidiomycota	Agaricomycetes	Geastrales	Sphaerobolaceae	Sphaerobolus	Sphaerobolus stellatus	990650
tr|A0A0C9UBS7|A0A0C9UBS7_9HOMO	A0A0C9UBS7	HC	True	159		NA	1	0	p20[14:172]	377	No	No	Sphaerobolus stellatus SS14	Basidiomycota	Eukaryota	Fungi	Basidiomycota	Agaricomycetes	Geastrales	Sphaerobolaceae	Sphaerobolus	Sphaerobolus stellatus	990650
tr|A0A0C9UUE7|A0A0C9UUE7_9HOMO	A0A0C9UUE7	HC	True	162		NA	1	0	p20[24:181]	455	No	No	Sphaerobolus stellatus SS14	Basidiomycota	Eukaryota	Fungi	Basidiomycota	Agaricomycetes	Geastrales	Sphaerobolaceae	Sphaerobolus	Sphaerobolus stellatus	990650
tr|A0A0C9VUM9|A0A0C9VUM9_9HOMO	A0A0C9VUM9	HC	True	177		NA	1	0	p20[2:178]	1154	No	No	Sphaerobolus stellatus SS14	Basidiomycota	Eukaryota	Fungi	Basidiomycota	Agaricomycetes	Geastrales	Sphaerobolaceae	Sphaerobolus	Sphaerobolus stellatus	990650
tr|A0A0C9U0Q4|A0A0C9U0Q4_9HOMO	A0A0C9U0Q4	HC	True	174		NA	1	0	p20[7:180]	382	No	No	Sphaerobolus stellatus SS14	Basidiomycota	Eukaryota	Fungi	Basidiomycota	Agaricomycetes	Geastrales	Sphaerobolaceae	Sphaerobolus	Sphaerobolus stellatus	990650
tr|A0A0C9UEI5|A0A0C9UEI5_9HOMO	A0A0C9UEI5	HC	True	148		NA	1	0	p20[3:150]	153	No	No	Sphaerobolus stellatus SS14	Basidiomycota	Eukaryota	Fungi	Basidiomycota	Agaricomycetes	Geastrales	Sphaerobolaceae	Sphaerobolus	Sphaerobolus stellatus	990650
tr|A0A0C9UUD1|A0A0C9UUD1_9HOMO	A0A0C9UUD1	HC	True	168		NA	1	0	p20[26:193]	196	No	No	Sphaerobolus stellatus SS14	Basidiomycota	Eukaryota	Fungi	Basidiomycota	Agaricomycetes	Geastrales	Sphaerobolaceae	Sphaerobolus	Sphaerobolus stellatus	990650
tr|A0A1X0RK74|A0A1X0RK74_9FUNG	A0A1X0RK74	HC	True	127		NA	1	0	p20[697:818]	909	No	No	Rhizopus microsporus	Mucoromycota	Eukaryota	Fungi	Mucoromycota	Mucoromycetes	Mucorales	Rhizopodaceae	Rhizopus	Rhizopus microsporus	58291
tr|A0A0C9V3P3|A0A0C9V3P3_9HOMO	A0A0C9V3P3	HC	True	189		NA	1	0	p20[11:193]	426	No	No	Sphaerobolus stellatus SS14	Basidiomycota	Eukaryota	Fungi	Basidiomycota	Agaricomycetes	Geastrales	Sphaerobolaceae	Sphaerobolus	Sphaerobolus stellatus	990650
tr|A0A0A1NZI2|A0A0A1NZI2_9FUNG	A0A0A1NZI2	HC	True	168		NA	1	0	p20[61:228]	288	No	No	Rhizopus microsporus	Mucoromycota	Eukaryota	Fungi	Mucoromycota	Mucoromycetes	Mucorales	Rhizopodaceae	Rhizopus	Rhizopus microsporus	58291
tr|A0A0C9UT23|A0A0C9UT23_9HOMO	A0A0C9UT23	LC	Pseudo	142		NA	1	0	p20[6:146]	630	No	No	Sphaerobolus stellatus SS14	Basidiomycota	Eukaryota	Fungi	Basidiomycota	Agaricomycetes	Geastrales	Sphaerobolaceae	Sphaerobolus	Sphaerobolus stellatus	990650
tr|A0A101MNK4|A0A101MNK4_9EURO	A0A101MNK4	HC	True	168		NA	1	0	p20[153:319]	413	No	No	Penicillium freii	Ascomycota	Eukaryota	Fungi	Ascomycota	Eurotiomycetes	Eurotiales	Aspergillaceae	Penicillium	Penicillium freii	48697
tr|A0A0F0IL01|A0A0F0IL01_ASPPU	A0A0F0IL01	HC	True	147		NA	1	0	p20[5:151]	814	No	No	Aspergillus parasiticus SU-1	Ascomycota	Eukaryota	Fungi	Ascomycota	Eurotiomycetes	Eurotiales	Aspergillaceae	Aspergillus	Aspergillus parasiticus	1403190
tr|A0A0C9WEL8|A0A0C9WEL8_9HOMO	A0A0C9WEL8	HC	True	176		NA	1	0	p20[71:231]	714	No	No	Hydnomerulius pinastri MD-312	Basidiomycota	Eukaryota	Fungi	Basidiomycota	Agaricomycetes	Boletales	Paxillaceae	Hydnomerulius	Hydnomerulius pinastri	994086
tr|A0A0C9WBW4|A0A0C9WBW4_9HOMO	A0A0C9WBW4	HC	True	167		NA	1	0	p20[16:182]	442	No	No	Hydnomerulius pinastri MD-312	Basidiomycota	Eukaryota	Fungi	Basidiomycota	Agaricomycetes	Boletales	Paxillaceae	Hydnomerulius	Hydnomerulius pinastri	994086
tr|A0A0C9UXC2|A0A0C9UXC2_9HOMO	A0A0C9UXC2	HC	True	159		NA	1	0	p20[15:172]	207	No	No	Hydnomerulius pinastri MD-312	Basidiomycota	Eukaryota	Fungi	Basidiomycota	Agaricomycetes	Boletales	Paxillaceae	Hydnomerulius	Hydnomerulius pinastri	994086
tr|A0A0C9W5D3|A0A0C9W5D3_9HOMO	A0A0C9W5D3	HC	True	128		NA	1	0	p20[9:136]	141	No	No	Hydnomerulius pinastri MD-312	Basidiomycota	Eukaryota	Fungi	Basidiomycota	Agaricomycetes	Boletales	Paxillaceae	Hydnomerulius	Hydnomerulius pinastri	994086
tr|A0A0C9VXQ6|A0A0C9VXQ6_9HOMO	A0A0C9VXQ6	HC	True	151		NA	1	0	p20[32:182]	442	No	No	Hydnomerulius pinastri MD-312	Basidiomycota	Eukaryota	Fungi	Basidiomycota	Agaricomycetes	Boletales	Paxillaceae	Hydnomerulius	Hydnomerulius pinastri	994086
tr|A0A1X0QY67|A0A1X0QY67_9FUNG	A0A1X0QY67	HC	True	123		NA	1	0	p20[688:808]	899	No	No	Rhizopus microsporus var. microsporus	Mucoromycota	Eukaryota	Fungi	Mucoromycota	Mucoromycetes	Mucorales	Rhizopodaceae	Rhizopus	Rhizopus microsporus	86635
tr|A0A1G4AU61|A0A1G4AU61_9PEZI	A0A1G4AU61	HC	True	182		NA	1	0	p20[18:189]	741	No	No	Colletotrichum orchidophilum	Ascomycota	Eukaryota	Fungi	Ascomycota	Sordariomycetes	Glomerellales	Glomerellaceae	Colletotrichum	Colletotrichum orchidophilum	1209926
tr|A0A094KAY6|A0A094KAY6_9PEZI	A0A094KAY6	HC	True	140		NA	1	0	p20[172:311]	387	No	No	Pseudogymnoascus sp. VKM F-4519 (FW-2642)	Ascomycota	Eukaryota	Fungi	Ascomycota	Leotiomycetes	NA	Pseudeurotiaceae	Pseudogymnoascus	Pseudogymnoascus sp. VKM F-4519 (FW-2642)	1420914
tr|A0A319ESU9|A0A319ESU9_9EURO	A0A319ESU9	HC	True	151		NA	1	0	p20[7:154]	821	No	No	Aspergillus sclerotiicarbonarius CBS 121057	Ascomycota	Eukaryota	Fungi	Ascomycota	Eurotiomycetes	Eurotiales	Aspergillaceae	Aspergillus	Aspergillus sclerotiicarbonarius	1448318
tr|A0A319E7P5|A0A319E7P5_9EURO	A0A319E7P5	HC	True	172		NA	1	0	p20[6:177]	661	No	No	Aspergillus sclerotiicarbonarius CBS 121057	Ascomycota	Eukaryota	Fungi	Ascomycota	Eurotiomycetes	Eurotiales	Aspergillaceae	Aspergillus	Aspergillus sclerotiicarbonarius	1448318
tr|A0A0C2IID5|A0A0C2IID5_9PEZI	A0A0C2IID5	HC	True	159		NA	1	0	p20[122:279]	360	No	No	Sporothrix brasiliensis 5110	Ascomycota	Eukaryota	Fungi	Ascomycota	Sordariomycetes	Ophiostomatales	Ophiostomataceae	Sporothrix	Sporothrix brasiliensis	1398154
tr|A0A0D2A8I9|A0A0D2A8I9_9PEZI	A0A0D2A8I9	HC	True	158		NA	1	0	p20[147:303]	471	No	No	Verruconis gallopava	Ascomycota	Eukaryota	Fungi	Ascomycota	Dothideomycetes	Venturiales	Sympoventuriaceae	Verruconis	Verruconis gallopava	253628
tr|A0A0D7AF86|A0A0D7AF86_9AGAR	A0A0D7AF86	HC	True	167		NA	1	0	p20[9:175]	319	No	No	Fistulina hepatica ATCC 64428	Basidiomycota	Eukaryota	Fungi	Basidiomycota	Agaricomycetes	Agaricales	Fistulinaceae	Fistulina	Fistulina hepatica	1128425
tr|A0A0D7AEZ8|A0A0D7AEZ8_9AGAR	A0A0D7AEZ8	HC	True	159		NA	1	0	p20[94:245]	471	No	No	Fistulina hepatica ATCC 64428	Basidiomycota	Eukaryota	Fungi	Basidiomycota	Agaricomycetes	Agaricales	Fistulinaceae	Fistulina	Fistulina hepatica	1128425
tr|A0A066V113|A0A066V113_9HOMO	A0A066V113	HC	True	153		NA	2	0	p20[43:195]-p20[1243:1399]	2096	No	No	Rhizoctonia solani AG-8 WAC10335	Basidiomycota	Eukaryota	Fungi	Basidiomycota	Agaricomycetes	Cantharellales	Ceratobasidiaceae	Rhizoctonia	Rhizoctonia solani	1287689
tr|A0A066V4J7|A0A066V4J7_9HOMO	A0A066V4J7	HC	True	154		NA	1	0	p20[48:201]	802	No	No	Rhizoctonia solani AG-8 WAC10335	Basidiomycota	Eukaryota	Fungi	Basidiomycota	Agaricomycetes	Cantharellales	Ceratobasidiaceae	Rhizoctonia	Rhizoctonia solani	1287689
tr|A0A2T5LZU7|A0A2T5LZU7_9EURO	A0A2T5LZU7	HC	True	137		NA	1	0	p20[16:142]	686	No	No	Aspergillus ochraceoroseus IBT 24754	Ascomycota	Eukaryota	Fungi	Ascomycota	Eurotiomycetes	Eurotiales	Aspergillaceae	Aspergillus	Aspergillus ochraceoroseus	1392256
tr|A0A066VTZ3|A0A066VTZ3_9HOMO	A0A066VTZ3	HC	True	197		NA	1	0	p20[21:217]	708	No	No	Rhizoctonia solani AG-8 WAC10335	Basidiomycota	Eukaryota	Fungi	Basidiomycota	Agaricomycetes	Cantharellales	Ceratobasidiaceae	Rhizoctonia	Rhizoctonia solani	1287689
tr|A0A066VF65|A0A066VF65_9HOMO	A0A066VF65	HC	True	157		NA	1	0	p20[124:280]	529	No	No	Rhizoctonia solani AG-8 WAC10335	Basidiomycota	Eukaryota	Fungi	Basidiomycota	Agaricomycetes	Cantharellales	Ceratobasidiaceae	Rhizoctonia	Rhizoctonia solani	1287689
tr|A0A066VLK5|A0A066VLK5_9HOMO	A0A066VLK5	HC	True	157		NA	1	0	p20[34:189]	600	No	No	Rhizoctonia solani AG-8 WAC10335	Basidiomycota	Eukaryota	Fungi	Basidiomycota	Agaricomycetes	Cantharellales	Ceratobasidiaceae	Rhizoctonia	Rhizoctonia solani	1287689
tr|A0A066V860|A0A066V860_9HOMO	A0A066V860	HC	True	196		NA	1	0	p20[63:145]	757	No	No	Rhizoctonia solani AG-8 WAC10335	Basidiomycota	Eukaryota	Fungi	Basidiomycota	Agaricomycetes	Cantharellales	Ceratobasidiaceae	Rhizoctonia	Rhizoctonia solani	1287689
tr|A0A066WI91|A0A066WI91_9HOMO	A0A066WI91	HC	True	179		NA	1	0	p20[270:448]	534	No	No	Rhizoctonia solani AG-8 WAC10335	Basidiomycota	Eukaryota	Fungi	Basidiomycota	Agaricomycetes	Cantharellales	Ceratobasidiaceae	Rhizoctonia	Rhizoctonia solani	1287689
tr|W9XRR3|W9XRR3_9EURO	W9XRR3	HY	Pseudo	137		NA	1	0	p20[47:183]	189	No	No	Cladophialophora psammophila CBS 110553	Ascomycota	Eukaryota	Fungi	Ascomycota	Eurotiomycetes	Chaetothyriales	Herpotrichiellaceae	Cladophialophora	Cladophialophora psammophila	1182543
tr|A0A066V8U0|A0A066V8U0_9HOMO	A0A066V8U0	HC	True	164		NA	1	0	p20[34:196]	500	No	No	Rhizoctonia solani AG-8 WAC10335	Basidiomycota	Eukaryota	Fungi	Basidiomycota	Agaricomycetes	Cantharellales	Ceratobasidiaceae	Rhizoctonia	Rhizoctonia solani	1287689
tr|A0A066VZV2|A0A066VZV2_9HOMO	A0A066VZV2	HC	True	163		NA	1	0	p20[70:225]	364	No	No	Rhizoctonia solani AG-8 WAC10335	Basidiomycota	Eukaryota	Fungi	Basidiomycota	Agaricomycetes	Cantharellales	Ceratobasidiaceae	Rhizoctonia	Rhizoctonia solani	1287689
tr|A0A066W9D0|A0A066W9D0_9HOMO	A0A066W9D0	HV	Pseudo	194		NA	1	0	p20[68:261]	320	No	No	Rhizoctonia solani AG-8 WAC10335	Basidiomycota	Eukaryota	Fungi	Basidiomycota	Agaricomycetes	Cantharellales	Ceratobasidiaceae	Rhizoctonia	Rhizoctonia solani	1287689
tr|A0A066V5Q8|A0A066V5Q8_9HOMO	A0A066V5Q8	HC	True	178		NA	1	0	p20[85:262]	327	No	No	Rhizoctonia solani AG-8 WAC10335	Basidiomycota	Eukaryota	Fungi	Basidiomycota	Agaricomycetes	Cantharellales	Ceratobasidiaceae	Rhizoctonia	Rhizoctonia solani	1287689
tr|A0A0C3B1D9|A0A0C3B1D9_9HOMO	A0A0C3B1D9	HC	True	179		NA	1	0	p20[14:192]	652	No	No	Serendipita vermifera MAFF 305830	Basidiomycota	Eukaryota	Fungi	Basidiomycota	Agaricomycetes	Sebacinales	Serendipitaceae	Serendipita	Serendipita vermifera	933852
tr|A0A0C3ALA4|A0A0C3ALA4_9HOMO	A0A0C3ALA4	HC	True	173		NA	1	0	p20[85:257]	733	No	No	Serendipita vermifera MAFF 305830	Basidiomycota	Eukaryota	Fungi	Basidiomycota	Agaricomycetes	Sebacinales	Serendipitaceae	Serendipita	Serendipita vermifera	933852
tr|A0A0C3AQ64|A0A0C3AQ64_9HOMO	A0A0C3AQ64	HC	True	173		NA	1	0	p20[96:258]	715	No	No	Serendipita vermifera MAFF 305830	Basidiomycota	Eukaryota	Fungi	Basidiomycota	Agaricomycetes	Sebacinales	Serendipitaceae	Serendipita	Serendipita vermifera	933852
tr|A0A0C3B222|A0A0C3B222_9HOMO	A0A0C3B222	HC	True	160		NA	1	0	p20[35:186]	702	No	No	Serendipita vermifera MAFF 305830	Basidiomycota	Eukaryota	Fungi	Basidiomycota	Agaricomycetes	Sebacinales	Serendipitaceae	Serendipita	Serendipita vermifera	933852
tr|A0A0C2W6X7|A0A0C2W6X7_9HOMO	A0A0C2W6X7	HC	True	173		NA	1	0	p20[85:257]	733	No	No	Serendipita vermifera MAFF 305830	Basidiomycota	Eukaryota	Fungi	Basidiomycota	Agaricomycetes	Sebacinales	Serendipitaceae	Serendipita	Serendipita vermifera	933852
tr|A0A0C2X2K6|A0A0C2X2K6_9HOMO	A0A0C2X2K6	HC	True	163		NA	1	0	p20[20:181]	690	No	No	Serendipita vermifera MAFF 305830	Basidiomycota	Eukaryota	Fungi	Basidiomycota	Agaricomycetes	Sebacinales	Serendipitaceae	Serendipita	Serendipita vermifera	933852
tr|A0A0C3AQP8|A0A0C3AQP8_9HOMO	A0A0C3AQP8	HC	True	139		NA	1	0	p20[106:244]	261	No	No	Serendipita vermifera MAFF 305830	Basidiomycota	Eukaryota	Fungi	Basidiomycota	Agaricomycetes	Sebacinales	Serendipitaceae	Serendipita	Serendipita vermifera	933852
tr|A0A0C3B424|A0A0C3B424_9HOMO	A0A0C3B424	HC	True	174		NA	1	0	p20[16:188]	686	No	No	Serendipita vermifera MAFF 305830	Basidiomycota	Eukaryota	Fungi	Basidiomycota	Agaricomycetes	Sebacinales	Serendipitaceae	Serendipita	Serendipita vermifera	933852
tr|A0A0C2X7X0|A0A0C2X7X0_9HOMO	A0A0C2X7X0	HC	True	173		NA	1	0	p20[67:239]	705	No	No	Serendipita vermifera MAFF 305830	Basidiomycota	Eukaryota	Fungi	Basidiomycota	Agaricomycetes	Sebacinales	Serendipitaceae	Serendipita	Serendipita vermifera	933852
tr|A0A0C3AVW9|A0A0C3AVW9_9HOMO	A0A0C3AVW9	HC	True	192		NA	1	0	p20[146:317]	634	No	No	Serendipita vermifera MAFF 305830	Basidiomycota	Eukaryota	Fungi	Basidiomycota	Agaricomycetes	Sebacinales	Serendipitaceae	Serendipita	Serendipita vermifera	933852
tr|A0A0C3B231|A0A0C3B231_9HOMO	A0A0C3B231	HC	True	156		NA	1	0	p20[61:215]	726	No	No	Serendipita vermifera MAFF 305830	Basidiomycota	Eukaryota	Fungi	Basidiomycota	Agaricomycetes	Sebacinales	Serendipitaceae	Serendipita	Serendipita vermifera	933852
tr|A0A0C3BIS3|A0A0C3BIS3_9HOMO	A0A0C3BIS3	HC	True	154		NA	1	0	p20[115:268]	401	No	No	Serendipita vermifera MAFF 305830	Basidiomycota	Eukaryota	Fungi	Basidiomycota	Agaricomycetes	Sebacinales	Serendipitaceae	Serendipita	Serendipita vermifera	933852
tr|A0A0C3AQ17|A0A0C3AQ17_9HOMO	A0A0C3AQ17	HC	True	171		NA	1	0	p20[244:410]	896	No	No	Serendipita vermifera MAFF 305830	Basidiomycota	Eukaryota	Fungi	Basidiomycota	Agaricomycetes	Sebacinales	Serendipitaceae	Serendipita	Serendipita vermifera	933852
tr|A0A0C2X901|A0A0C2X901_9HOMO	A0A0C2X901	HC	True	163		NA	1	0	p20[94:252]	736	No	No	Serendipita vermifera MAFF 305830	Basidiomycota	Eukaryota	Fungi	Basidiomycota	Agaricomycetes	Sebacinales	Serendipitaceae	Serendipita	Serendipita vermifera	933852
tr|A0A0C3AVQ6|A0A0C3AVQ6_9HOMO	A0A0C3AVQ6	HC	True	167		NA	1	0	p20[18:176]	662	No	No	Serendipita vermifera MAFF 305830	Basidiomycota	Eukaryota	Fungi	Basidiomycota	Agaricomycetes	Sebacinales	Serendipitaceae	Serendipita	Serendipita vermifera	933852
tr|A0A0C2W2C9|A0A0C2W2C9_9HOMO	A0A0C2W2C9	HC	True	171		NA	1	0	p20[4:169]	618	No	No	Serendipita vermifera MAFF 305830	Basidiomycota	Eukaryota	Fungi	Basidiomycota	Agaricomycetes	Sebacinales	Serendipitaceae	Serendipita	Serendipita vermifera	933852
tr|A0A0C3B427|A0A0C3B427_9HOMO	A0A0C3B427	HC	True	184		NA	1	0	p20[28:211]	695	No	No	Serendipita vermifera MAFF 305830	Basidiomycota	Eukaryota	Fungi	Basidiomycota	Agaricomycetes	Sebacinales	Serendipitaceae	Serendipita	Serendipita vermifera	933852
tr|A0A0C2WB92|A0A0C2WB92_9HOMO	A0A0C2WB92	HC	True	118		NA	1	0	p20[15:132]	519	No	No	Serendipita vermifera MAFF 305830	Basidiomycota	Eukaryota	Fungi	Basidiomycota	Agaricomycetes	Sebacinales	Serendipitaceae	Serendipita	Serendipita vermifera	933852
tr|A0A0C3AV44|A0A0C3AV44_9HOMO	A0A0C3AV44	YC	Pseudo	142		NA	1	0	p20[7:148]	276	No	No	Serendipita vermifera MAFF 305830	Basidiomycota	Eukaryota	Fungi	Basidiomycota	Agaricomycetes	Sebacinales	Serendipitaceae	Serendipita	Serendipita vermifera	933852
tr|A0A0C3B5C6|A0A0C3B5C6_9HOMO	A0A0C3B5C6	HC	True	173		NA	1	0	p20[86:249]	750	No	No	Serendipita vermifera MAFF 305830	Basidiomycota	Eukaryota	Fungi	Basidiomycota	Agaricomycetes	Sebacinales	Serendipitaceae	Serendipita	Serendipita vermifera	933852
tr|X0AZJ6|X0AZJ6_FUSOX	X0AZJ6	HC	True	145		NA	1	0	p20[13:157]	619	No	No	Fusarium oxysporum f. sp. melonis 26406	Ascomycota	Eukaryota	Fungi	Ascomycota	Sordariomycetes	Hypocreales	Nectriaceae	Fusarium	Fusarium oxysporum	1089452
tr|W9ZH03|W9ZH03_FUSOX	W9ZH03	HC	True	158		NA	1	0	p20[10:167]	675	No	No	Fusarium oxysporum f. sp. melonis 26406	Ascomycota	Eukaryota	Fungi	Ascomycota	Sordariomycetes	Hypocreales	Nectriaceae	Fusarium	Fusarium oxysporum	1089452
tr|A0A0L1JEK7|A0A0L1JEK7_ASPNO	A0A0L1JEK7	HC	True	150		NA	1	0	p20[5:154]	814	No	No	Aspergillus nomius NRRL 13137	Ascomycota	Eukaryota	Fungi	Ascomycota	Eurotiomycetes	Eurotiales	Aspergillaceae	Aspergillus	Aspergillus nomius	1509407
tr|X0AWV6|X0AWV6_FUSOX	X0AWV6	HC	True	158		NA	1	0	p20[121:278]	367	No	No	Fusarium oxysporum f. sp. melonis 26406	Ascomycota	Eukaryota	Fungi	Ascomycota	Sordariomycetes	Hypocreales	Nectriaceae	Fusarium	Fusarium oxysporum	1089452
tr|X8JCS2|X8JCS2_9HOMO	X8JCS2	HC	True	163		NA	1	0	p20[309:471]	976	No	No	Rhizoctonia solani AG-3 Rhs1AP	Basidiomycota	Eukaryota	Fungi	Basidiomycota	Agaricomycetes	Cantharellales	Ceratobasidiaceae	Rhizoctonia	Rhizoctonia solani	1086054
tr|A0A0A1UHU6|A0A0A1UHU6_9HOMO	A0A0A1UHU6	HC	True	164		NA	1	0	p20[37:200]	281	No	No	Rhizoctonia solani AG-3 Rhs1AP	Basidiomycota	Eukaryota	Fungi	Basidiomycota	Agaricomycetes	Cantharellales	Ceratobasidiaceae	Rhizoctonia	Rhizoctonia solani	1086054
tr|X8JCQ5|X8JCQ5_9HOMO	X8JCQ5	HC	True	156		NA	1	0	p20[65:219]	745	No	No	Rhizoctonia solani AG-3 Rhs1AP	Basidiomycota	Eukaryota	Fungi	Basidiomycota	Agaricomycetes	Cantharellales	Ceratobasidiaceae	Rhizoctonia	Rhizoctonia solani	1086054
tr|A0A1Q3E5T5|A0A1Q3E5T5_LENED	A0A1Q3E5T5	HC	True	150		NA	1	0	p20[7:156]	426	No	No	Lentinula edodes	Basidiomycota	Eukaryota	Fungi	Basidiomycota	Agaricomycetes	Agaricales	Omphalotaceae	Lentinula	Lentinula edodes	5353
tr|X8JCX3|X8JCX3_9HOMO	X8JCX3	HC	True	193		NA	2	0	p20[21:213]-p20[699:851]	1371	No	No	Rhizoctonia solani AG-3 Rhs1AP	Basidiomycota	Eukaryota	Fungi	Basidiomycota	Agaricomycetes	Cantharellales	Ceratobasidiaceae	Rhizoctonia	Rhizoctonia solani	1086054
tr|A0A1Q3DX55|A0A1Q3DX55_LENED	A0A1Q3DX55	HC	True	195		NA	1	0	p20[537:731]	1658	No	No	Lentinula edodes	Basidiomycota	Eukaryota	Fungi	Basidiomycota	Agaricomycetes	Agaricales	Omphalotaceae	Lentinula	Lentinula edodes	5353
tr|X8JMV4|X8JMV4_9HOMO	X8JMV4	HC	True	174		NA	1	0	p20[271:444]	567	No	No	Rhizoctonia solani AG-3 Rhs1AP	Basidiomycota	Eukaryota	Fungi	Basidiomycota	Agaricomycetes	Cantharellales	Ceratobasidiaceae	Rhizoctonia	Rhizoctonia solani	1086054
tr|X8IZ81|X8IZ81_9HOMO	X8IZ81	HC	True	161		NA	1	0	p20[30:189]	793	No	No	Rhizoctonia solani AG-3 Rhs1AP	Basidiomycota	Eukaryota	Fungi	Basidiomycota	Agaricomycetes	Cantharellales	Ceratobasidiaceae	Rhizoctonia	Rhizoctonia solani	1086054
tr|X8J7E6|X8J7E6_9HOMO	X8J7E6	HC	True	127		NA	1	0	p20[5:131]	387	No	No	Rhizoctonia solani AG-3 Rhs1AP	Basidiomycota	Eukaryota	Fungi	Basidiomycota	Agaricomycetes	Cantharellales	Ceratobasidiaceae	Rhizoctonia	Rhizoctonia solani	1086054
tr|X8JIA7|X8JIA7_9HOMO	X8JIA7	HC	True	173		NA	1	0	p20[56:228]	428	No	No	Rhizoctonia solani AG-3 Rhs1AP	Basidiomycota	Eukaryota	Fungi	Basidiomycota	Agaricomycetes	Cantharellales	Ceratobasidiaceae	Rhizoctonia	Rhizoctonia solani	1086054
tr|X8JBX4|X8JBX4_9HOMO	X8JBX4	HC	True	165		NA	1	0	p20[20:184]	684	No	No	Rhizoctonia solani AG-3 Rhs1AP	Basidiomycota	Eukaryota	Fungi	Basidiomycota	Agaricomycetes	Cantharellales	Ceratobasidiaceae	Rhizoctonia	Rhizoctonia solani	1086054
tr|X8JDT3|X8JDT3_9HOMO	X8JDT3	HC	True	153		NA	1	0	p20[23:175]	697	No	No	Rhizoctonia solani AG-3 Rhs1AP	Basidiomycota	Eukaryota	Fungi	Basidiomycota	Agaricomycetes	Cantharellales	Ceratobasidiaceae	Rhizoctonia	Rhizoctonia solani	1086054
tr|X8JEZ0|X8JEZ0_9HOMO	X8JEZ0	HS	Pseudo	161		NA	1	0	p20[20:180]	698	No	No	Rhizoctonia solani AG-3 Rhs1AP	Basidiomycota	Eukaryota	Fungi	Basidiomycota	Agaricomycetes	Cantharellales	Ceratobasidiaceae	Rhizoctonia	Rhizoctonia solani	1086054
tr|X8J0J8|X8J0J8_9HOMO	X8J0J8	HC	True	148		NA	1	0	p20[58:201]	333	No	No	Rhizoctonia solani AG-3 Rhs1AP	Basidiomycota	Eukaryota	Fungi	Basidiomycota	Agaricomycetes	Cantharellales	Ceratobasidiaceae	Rhizoctonia	Rhizoctonia solani	1086054
tr|X8IYT1|X8IYT1_9HOMO	X8IYT1	HC	True	148		NA	1	0	p20[1201:1347]	1929	No	No	Rhizoctonia solani AG-3 Rhs1AP	Basidiomycota	Eukaryota	Fungi	Basidiomycota	Agaricomycetes	Cantharellales	Ceratobasidiaceae	Rhizoctonia	Rhizoctonia solani	1086054
tr|X8IXI3|X8IXI3_9HOMO	X8IXI3	HC	True	151		NA	1	0	p20[43:193]	822	No	No	Rhizoctonia solani AG-3 Rhs1AP	Basidiomycota	Eukaryota	Fungi	Basidiomycota	Agaricomycetes	Cantharellales	Ceratobasidiaceae	Rhizoctonia	Rhizoctonia solani	1086054
tr|A0A1Q3DY12|A0A1Q3DY12_LENED	A0A1Q3DY12	HC	True	176		NA	1	0	p20[5:179]	426	No	No	Lentinula edodes	Basidiomycota	Eukaryota	Fungi	Basidiomycota	Agaricomycetes	Agaricales	Omphalotaceae	Lentinula	Lentinula edodes	5353
tr|X8JHE6|X8JHE6_9HOMO	X8JHE6	HC	True	132		NA	1	0	p20[52:180]	307	No	No	Rhizoctonia solani AG-3 Rhs1AP	Basidiomycota	Eukaryota	Fungi	Basidiomycota	Agaricomycetes	Cantharellales	Ceratobasidiaceae	Rhizoctonia	Rhizoctonia solani	1086054
tr|X8IZD1|X8IZD1_9HOMO	X8IZD1	FC	Pseudo	161		NA	1	0	p20[15:175]	677	No	No	Rhizoctonia solani AG-3 Rhs1AP	Basidiomycota	Eukaryota	Fungi	Basidiomycota	Agaricomycetes	Cantharellales	Ceratobasidiaceae	Rhizoctonia	Rhizoctonia solani	1086054
tr|X8JBF5|X8JBF5_9HOMO	X8JBF5	HC	True	187		NA	1	0	p20[2:188]	230	No	No	Rhizoctonia solani AG-3 Rhs1AP	Basidiomycota	Eukaryota	Fungi	Basidiomycota	Agaricomycetes	Cantharellales	Ceratobasidiaceae	Rhizoctonia	Rhizoctonia solani	1086054
tr|X8J8C4|X8J8C4_9HOMO	X8J8C4	HC	True	145		NA	1	0	p20[140:274]	497	No	No	Rhizoctonia solani AG-3 Rhs1AP	Basidiomycota	Eukaryota	Fungi	Basidiomycota	Agaricomycetes	Cantharellales	Ceratobasidiaceae	Rhizoctonia	Rhizoctonia solani	1086054
tr|X8J616|X8J616_9HOMO	X8J616	HC	True	153		NA	1	0	p20[157:309]	556	No	No	Rhizoctonia solani AG-3 Rhs1AP	Basidiomycota	Eukaryota	Fungi	Basidiomycota	Agaricomycetes	Cantharellales	Ceratobasidiaceae	Rhizoctonia	Rhizoctonia solani	1086054
tr|X8J453|X8J453_9HOMO	X8J453	HL	Pseudo	196		NA	1	0	p20[76:257]	427	No	No	Rhizoctonia solani AG-3 Rhs1AP	Basidiomycota	Eukaryota	Fungi	Basidiomycota	Agaricomycetes	Cantharellales	Ceratobasidiaceae	Rhizoctonia	Rhizoctonia solani	1086054
tr|A0A366PGY7|A0A366PGY7_GIBMO	A0A366PGY7	HC	True	159		NA	1	0	p20[10:168]	669	No	No	Fusarium verticillioides	Ascomycota	Eukaryota	Fungi	Ascomycota	Sordariomycetes	Hypocreales	Nectriaceae	Fusarium	Fusarium verticillioides	117187
tr|A0A366RS27|A0A366RS27_GIBMO	A0A366RS27	HC	True	155		NA	1	0	p20[10:164]	209	No	No	Fusarium verticillioides	Ascomycota	Eukaryota	Fungi	Ascomycota	Sordariomycetes	Hypocreales	Nectriaceae	Fusarium	Fusarium verticillioides	117187
tr|A0A172WC21|A0A172WC21_GIBMO	A0A172WC21	HC	True	149		NA	1	0	p20[30:178]	667	No	No	Fusarium verticillioides	Ascomycota	Eukaryota	Fungi	Ascomycota	Sordariomycetes	Hypocreales	Nectriaceae	Fusarium	Fusarium verticillioides	117187
tr|A0A0F8WWS5|A0A0F8WWS5_9EURO	A0A0F8WWS5	HC	True	137		NA	1	0	p20[16:142]	686	No	No	Aspergillus rambellii	Ascomycota	Eukaryota	Fungi	Ascomycota	Eurotiomycetes	Eurotiales	Aspergillaceae	Aspergillus	Aspergillus rambellii	308745
tr|N4UGV6|N4UGV6_FUSC1	N4UGV6	HC	True	168		NA	1	0	p20[12:173]	645	No	No	Fusarium oxysporum f. sp. cubense race 1	Ascomycota	Eukaryota	Fungi	Ascomycota	Sordariomycetes	Hypocreales	Nectriaceae	Fusarium	Fusarium oxysporum	1229664
tr|N4UWD4|N4UWD4_FUSC1	N4UWD4	HC	True	160		NA	1	0	p20[20:177]	666	No	No	Fusarium oxysporum f. sp. cubense race 1	Ascomycota	Eukaryota	Fungi	Ascomycota	Sordariomycetes	Hypocreales	Nectriaceae	Fusarium	Fusarium oxysporum	1229664
tr|G3YD02|G3YD02_ASPNA	G3YD02	HC	True	166		NA	1	0	p20[4:169]	434	No	No	Aspergillus niger ATCC 1015	Ascomycota	Eukaryota	Fungi	Ascomycota	Eurotiomycetes	Eurotiales	Aspergillaceae	Aspergillus	Aspergillus niger	380704
tr|G3YD00|G3YD00_ASPNA	G3YD00	HC	True	126		NA	1	0	p20[1:126]	603	No	No	Aspergillus niger ATCC 1015	Ascomycota	Eukaryota	Fungi	Ascomycota	Eurotiomycetes	Eurotiales	Aspergillaceae	Aspergillus	Aspergillus niger	380704
tr|G3Y079|G3Y079_ASPNA	G3Y079	HC	True	143		NA	1	0	p20[89:231]	898	No	No	Aspergillus niger ATCC 1015	Ascomycota	Eukaryota	Fungi	Ascomycota	Eurotiomycetes	Eurotiales	Aspergillaceae	Aspergillus	Aspergillus niger	380704
tr|A0A2A9NT80|A0A2A9NT80_9AGAR	A0A2A9NT80	HC	True	149		NA	1	0	p20[7:155]	645	No	No	Amanita thiersii Skay4041	Basidiomycota	Eukaryota	Fungi	Basidiomycota	Agaricomycetes	Agaricales	Amanitaceae	Amanita	Amanita thiersii	703135
tr|A0A178Z226|A0A178Z226_9EURO	A0A178Z226	HC	True	157		NA	1	0	p20[597:753]	2576	No	No	Fonsecaea erecta	Ascomycota	Eukaryota	Fungi	Ascomycota	Eurotiomycetes	Chaetothyriales	Herpotrichiellaceae	Fonsecaea	Fonsecaea erecta	1367422
tr|A0A178Z1R0|A0A178Z1R0_9EURO	A0A178Z1R0	HC	True	164		NA	1	0	p20[6:169]	653	No	No	Fonsecaea erecta	Ascomycota	Eukaryota	Fungi	Ascomycota	Eurotiomycetes	Chaetothyriales	Herpotrichiellaceae	Fonsecaea	Fonsecaea erecta	1367422
tr|A0A178Z8C5|A0A178Z8C5_9EURO	A0A178Z8C5	HC	True	172		NA	1	0	p20[9:180]	672	No	No	Fonsecaea erecta	Ascomycota	Eukaryota	Fungi	Ascomycota	Eurotiomycetes	Chaetothyriales	Herpotrichiellaceae	Fonsecaea	Fonsecaea erecta	1367422
tr|A0A074XEH7|A0A074XEH7_AURPU	A0A074XEH7	HC	True	174		NA	1	0	p20[4:177]	298	No	No	Aureobasidium pullulans EXF-150	Ascomycota	Eukaryota	Fungi	Ascomycota	Dothideomycetes	Dothideales	Saccotheciaceae	Aureobasidium	Aureobasidium pullulans	1043002
tr|G0S1H7|G0S1H7_CHATD	G0S1H7	HC	True	160		NA	1	0	p20[11:169]	610	No	No	Chaetomium thermophilum var. thermophilum DSM 1495	Ascomycota	Eukaryota	Fungi	Ascomycota	Sordariomycetes	Sordariales	Chaetomiaceae	Chaetomium	Chaetomium thermophilum	759272
tr|A0A135TC01|A0A135TC01_9PEZI	A0A135TC01	HC	True	166		NA	1	0	p20[10:175]	709	No	No	Colletotrichum simmondsii	Ascomycota	Eukaryota	Fungi	Ascomycota	Sordariomycetes	Glomerellales	Glomerellaceae	Colletotrichum	Colletotrichum simmondsii	703756
tr|I4Y6M3|I4Y6M3_WALMC	I4Y6M3	HC	True	172		NA	1	0	p20[28:199]	306	No	No	Wallemia mellicola CBS 633.66	Basidiomycota	Eukaryota	Fungi	Basidiomycota	Wallemiomycetes	Wallemiales	Wallemiaceae	Wallemia	Wallemia mellicola	671144
tr|A0A135SDD7|A0A135SDD7_9PEZI	A0A135SDD7	HC	True	166		NA	1	0	p20[10:173]	647	No	No	Colletotrichum simmondsii	Ascomycota	Eukaryota	Fungi	Ascomycota	Sordariomycetes	Glomerellales	Glomerellaceae	Colletotrichum	Colletotrichum simmondsii	703756
tr|E5A2W6|E5A2W6_LEPMJ	E5A2W6	HC	True	158		NA	1	0	p20[4:161]	364	No	No	Leptosphaeria maculans JN3	Ascomycota	Eukaryota	Fungi	Ascomycota	Dothideomycetes	Pleosporales	Leptosphaeriaceae	Leptosphaeria	Leptosphaeria maculans	985895
tr|A0A1J7J3H4|A0A1J7J3H4_9PEZI	A0A1J7J3H4	HC	True	197		NA	1	0	p20[8:204]	683	No	No	Coniochaeta ligniaria NRRL 30616	Ascomycota	Eukaryota	Fungi	Ascomycota	Sordariomycetes	Coniochaetales	Coniochaetaceae	Coniochaeta	Coniochaeta ligniaria	1408157
tr|A0A284SCV4|A0A284SCV4_9AGAR	A0A284SCV4	HC	True	171		NA	1	0	p20[779:949]	1070	No	No	Armillaria ostoyae	Basidiomycota	Eukaryota	Fungi	Basidiomycota	Agaricomycetes	Agaricales	Physalacriaceae	Armillaria	Armillaria ostoyae	47428
tr|A0A284QXA7|A0A284QXA7_9AGAR	A0A284QXA7	YY	Pseudo	163		NA	1	0	p20[559:721]	848	No	No	Armillaria ostoyae	Basidiomycota	Eukaryota	Fungi	Basidiomycota	Agaricomycetes	Agaricales	Physalacriaceae	Armillaria	Armillaria ostoyae	47428
tr|A0A284SAA8|A0A284SAA8_9AGAR	A0A284SAA8	HC	True	163		NA	1	0	p20[260:422]	577	No	No	Armillaria ostoyae	Basidiomycota	Eukaryota	Fungi	Basidiomycota	Agaricomycetes	Agaricales	Physalacriaceae	Armillaria	Armillaria ostoyae	47428
tr|A0A284S249|A0A284S249_9AGAR	A0A284S249	HC	True	171		NA	1	0	p20[105:275]	399	No	No	Armillaria ostoyae	Basidiomycota	Eukaryota	Fungi	Basidiomycota	Agaricomycetes	Agaricales	Physalacriaceae	Armillaria	Armillaria ostoyae	47428
tr|A0A369K0I3|A0A369K0I3_HYPMA	A0A369K0I3	HC	True	157		NA	1	0	p20[670:826]	1327	No	No	Hypsizygus marmoreus	Basidiomycota	Eukaryota	Fungi	Basidiomycota	Agaricomycetes	Agaricales	Lyophyllaceae	Hypsizygus	Hypsizygus marmoreus	39966
tr|A0A284S0S6|A0A284S0S6_9AGAR	A0A284S0S6	LC	Pseudo	174		NA	1	0	p20[148:321]	423	No	No	Armillaria ostoyae	Basidiomycota	Eukaryota	Fungi	Basidiomycota	Agaricomycetes	Agaricales	Physalacriaceae	Armillaria	Armillaria ostoyae	47428
tr|A0A284S299|A0A284S299_9AGAR	A0A284S299	HC	True	170		NA	1	0	p20[110:279]	393	No	No	Armillaria ostoyae	Basidiomycota	Eukaryota	Fungi	Basidiomycota	Agaricomycetes	Agaricales	Physalacriaceae	Armillaria	Armillaria ostoyae	47428
tr|A0A284RV43|A0A284RV43_9AGAR	A0A284RV43	HC	True	121		NA	1	0	p20[41:161]	325	No	No	Armillaria ostoyae	Basidiomycota	Eukaryota	Fungi	Basidiomycota	Agaricomycetes	Agaricales	Physalacriaceae	Armillaria	Armillaria ostoyae	47428
tr|A0A284R1D0|A0A284R1D0_9AGAR	A0A284R1D0	HC	True	160		NA	1	0	p20[127:286]	409	No	No	Armillaria ostoyae	Basidiomycota	Eukaryota	Fungi	Basidiomycota	Agaricomycetes	Agaricales	Physalacriaceae	Armillaria	Armillaria ostoyae	47428
tr|A0A284RGX0|A0A284RGX0_9AGAR	A0A284RGX0	HC	True	168		NA	1	0	p20[97:264]	464	No	No	Armillaria ostoyae	Basidiomycota	Eukaryota	Fungi	Basidiomycota	Agaricomycetes	Agaricales	Physalacriaceae	Armillaria	Armillaria ostoyae	47428
tr|A0A284RGY0|A0A284RGY0_9AGAR	A0A284RGY0	HC	True	168		NA	1	0	p20[18:185]	698	No	No	Armillaria ostoyae	Basidiomycota	Eukaryota	Fungi	Basidiomycota	Agaricomycetes	Agaricales	Physalacriaceae	Armillaria	Armillaria ostoyae	47428
tr|A0A284RV94|A0A284RV94_9AGAR	A0A284RV94	HC	True	112		NA	1	0	p20[10:121]	254	No	No	Armillaria ostoyae	Basidiomycota	Eukaryota	Fungi	Basidiomycota	Agaricomycetes	Agaricales	Physalacriaceae	Armillaria	Armillaria ostoyae	47428
tr|A0A284RV59|A0A284RV59_9AGAR	A0A284RV59	HC	True	152		NA	1	0	p20[119:269]	392	No	No	Armillaria ostoyae	Basidiomycota	Eukaryota	Fungi	Basidiomycota	Agaricomycetes	Agaricales	Physalacriaceae	Armillaria	Armillaria ostoyae	47428
tr|A0A284QRQ4|A0A284QRQ4_9AGAR	A0A284QRQ4	HC	True	179		NA	1	0	p20[174:346]	458	No	No	Armillaria ostoyae	Basidiomycota	Eukaryota	Fungi	Basidiomycota	Agaricomycetes	Agaricales	Physalacriaceae	Armillaria	Armillaria ostoyae	47428
tr|A0A284S3N9|A0A284S3N9_9AGAR	A0A284S3N9	HC	True	145		NA	1	0	p20[148:286]	825	No	No	Armillaria ostoyae	Basidiomycota	Eukaryota	Fungi	Basidiomycota	Agaricomycetes	Agaricales	Physalacriaceae	Armillaria	Armillaria ostoyae	47428
tr|A0A284RJH8|A0A284RJH8_9AGAR	A0A284RJH8	HC	True	178		NA	1	0	p20[105:279]	399	No	No	Armillaria ostoyae	Basidiomycota	Eukaryota	Fungi	Basidiomycota	Agaricomycetes	Agaricales	Physalacriaceae	Armillaria	Armillaria ostoyae	47428
tr|A0A369JSF0|A0A369JSF0_HYPMA	A0A369JSF0	HC	True	152		NA	1	0	p20[7:158]	649	No	No	Hypsizygus marmoreus	Basidiomycota	Eukaryota	Fungi	Basidiomycota	Agaricomycetes	Agaricales	Lyophyllaceae	Hypsizygus	Hypsizygus marmoreus	39966
tr|A0A284SCU9|A0A284SCU9_9AGAR	A0A284SCU9	HC	True	188		NA	1	0	p20[169:356]	458	No	No	Armillaria ostoyae	Basidiomycota	Eukaryota	Fungi	Basidiomycota	Agaricomycetes	Agaricales	Physalacriaceae	Armillaria	Armillaria ostoyae	47428
tr|A0A284QPM1|A0A284QPM1_9AGAR	A0A284QPM1	HC	True	151		NA	1	0	p20[126:268]	776	No	No	Armillaria ostoyae	Basidiomycota	Eukaryota	Fungi	Basidiomycota	Agaricomycetes	Agaricales	Physalacriaceae	Armillaria	Armillaria ostoyae	47428
tr|A0A369JX90|A0A369JX90_HYPMA	A0A369JX90	HC	True	173		NA	1	0	p20[39:211]	348	No	No	Hypsizygus marmoreus	Basidiomycota	Eukaryota	Fungi	Basidiomycota	Agaricomycetes	Agaricales	Lyophyllaceae	Hypsizygus	Hypsizygus marmoreus	39966
tr|A0A284S3Q0|A0A284S3Q0_9AGAR	A0A284S3Q0	HC	True	148		NA	1	0	p20[60:204]	696	No	No	Armillaria ostoyae	Basidiomycota	Eukaryota	Fungi	Basidiomycota	Agaricomycetes	Agaricales	Physalacriaceae	Armillaria	Armillaria ostoyae	47428
tr|A0A284S1N1|A0A284S1N1_9AGAR	A0A284S1N1	HC	True	166		NA	1	0	p20[20:185]	246	No	No	Armillaria ostoyae	Basidiomycota	Eukaryota	Fungi	Basidiomycota	Agaricomycetes	Agaricales	Physalacriaceae	Armillaria	Armillaria ostoyae	47428
tr|A0A284RVB3|A0A284RVB3_9AGAR	A0A284RVB3	HS	Pseudo	167		NA	1	0	p20[172:336]	449	No	No	Armillaria ostoyae	Basidiomycota	Eukaryota	Fungi	Basidiomycota	Agaricomycetes	Agaricales	Physalacriaceae	Armillaria	Armillaria ostoyae	47428
tr|A0A284RGV8|A0A284RGV8_9AGAR	A0A284RGV8	HC	True	180		NA	1	0	p20[83:262]	386	No	No	Armillaria ostoyae	Basidiomycota	Eukaryota	Fungi	Basidiomycota	Agaricomycetes	Agaricales	Physalacriaceae	Armillaria	Armillaria ostoyae	47428
tr|A0A284RMZ9|A0A284RMZ9_9AGAR	A0A284RMZ9	HC	True	168		NA	1	0	p20[42:208]	713	No	No	Armillaria ostoyae	Basidiomycota	Eukaryota	Fungi	Basidiomycota	Agaricomycetes	Agaricales	Physalacriaceae	Armillaria	Armillaria ostoyae	47428
tr|A0A284RV92|A0A284RV92_9AGAR	A0A284RV92	HC	True	162		NA	1	0	p20[59:216]	326	No	No	Armillaria ostoyae	Basidiomycota	Eukaryota	Fungi	Basidiomycota	Agaricomycetes	Agaricales	Physalacriaceae	Armillaria	Armillaria ostoyae	47428
tr|A0A284S2Y8|A0A284S2Y8_9AGAR	A0A284S2Y8	HC	True	184		NA	1	0	p20[144:327]	440	No	No	Armillaria ostoyae	Basidiomycota	Eukaryota	Fungi	Basidiomycota	Agaricomycetes	Agaricales	Physalacriaceae	Armillaria	Armillaria ostoyae	47428
tr|A0A284RV68|A0A284RV68_9AGAR	A0A284RV68	HC	True	180		NA	1	0	p20[49:228]	383	No	No	Armillaria ostoyae	Basidiomycota	Eukaryota	Fungi	Basidiomycota	Agaricomycetes	Agaricales	Physalacriaceae	Armillaria	Armillaria ostoyae	47428
tr|A0A284QSU5|A0A284QSU5_9AGAR	A0A284QSU5	HC	True	171		NA	1	0	p20[130:300]	414	No	No	Armillaria ostoyae	Basidiomycota	Eukaryota	Fungi	Basidiomycota	Agaricomycetes	Agaricales	Physalacriaceae	Armillaria	Armillaria ostoyae	47428
tr|A0A284RP93|A0A284RP93_9AGAR	A0A284RP93	HC	True	188		NA	1	0	p20[49:232]	351	No	No	Armillaria ostoyae	Basidiomycota	Eukaryota	Fungi	Basidiomycota	Agaricomycetes	Agaricales	Physalacriaceae	Armillaria	Armillaria ostoyae	47428
tr|A0A284SA63|A0A284SA63_9AGAR	A0A284SA63	HC	True	149		NA	1	0	p20[123:271]	395	No	No	Armillaria ostoyae	Basidiomycota	Eukaryota	Fungi	Basidiomycota	Agaricomycetes	Agaricales	Physalacriaceae	Armillaria	Armillaria ostoyae	47428
tr|A0A284RP98|A0A284RP98_9AGAR	A0A284RP98	HC	True	166		NA	1	0	p20[90:254]	366	No	No	Armillaria ostoyae	Basidiomycota	Eukaryota	Fungi	Basidiomycota	Agaricomycetes	Agaricales	Physalacriaceae	Armillaria	Armillaria ostoyae	47428
tr|A0A284RPK9|A0A284RPK9_9AGAR	A0A284RPK9	HC	True	171		NA	1	0	p20[45:215]	340	No	No	Armillaria ostoyae	Basidiomycota	Eukaryota	Fungi	Basidiomycota	Agaricomycetes	Agaricales	Physalacriaceae	Armillaria	Armillaria ostoyae	47428
tr|A0A284RCH5|A0A284RCH5_9AGAR	A0A284RCH5	HC	True	159		NA	1	0	p20[68:220]	279	No	No	Armillaria ostoyae	Basidiomycota	Eukaryota	Fungi	Basidiomycota	Agaricomycetes	Agaricales	Physalacriaceae	Armillaria	Armillaria ostoyae	47428
tr|A0A284QS60|A0A284QS60_9AGAR	A0A284QS60	HC	True	171		NA	1	0	p20[124:294]	415	No	No	Armillaria ostoyae	Basidiomycota	Eukaryota	Fungi	Basidiomycota	Agaricomycetes	Agaricales	Physalacriaceae	Armillaria	Armillaria ostoyae	47428
tr|A0A284S2D4|A0A284S2D4_9AGAR	A0A284S2D4	HC	True	157		NA	1	0	p20[51:207]	279	No	No	Armillaria ostoyae	Basidiomycota	Eukaryota	Fungi	Basidiomycota	Agaricomycetes	Agaricales	Physalacriaceae	Armillaria	Armillaria ostoyae	47428
tr|A0A284SAG6|A0A284SAG6_9AGAR	A0A284SAG6	HC	True	200		NA	1	0	p20[211:410]	525	No	No	Armillaria ostoyae	Basidiomycota	Eukaryota	Fungi	Basidiomycota	Agaricomycetes	Agaricales	Physalacriaceae	Armillaria	Armillaria ostoyae	47428
tr|A0A284RUE3|A0A284RUE3_9AGAR	A0A284RUE3	HC	True	175		NA	1	0	p20[16:188]	348	No	No	Armillaria ostoyae	Basidiomycota	Eukaryota	Fungi	Basidiomycota	Agaricomycetes	Agaricales	Physalacriaceae	Armillaria	Armillaria ostoyae	47428
tr|A0A284QLU9|A0A284QLU9_9AGAR	A0A284QLU9	HS	Pseudo	156		NA	1	0	p20[6:161]	445	No	No	Armillaria ostoyae	Basidiomycota	Eukaryota	Fungi	Basidiomycota	Agaricomycetes	Agaricales	Physalacriaceae	Armillaria	Armillaria ostoyae	47428
tr|A0A284RVB0|A0A284RVB0_9AGAR	A0A284RVB0	HC	True	175		NA	1	0	p20[122:293]	416	No	No	Armillaria ostoyae	Basidiomycota	Eukaryota	Fungi	Basidiomycota	Agaricomycetes	Agaricales	Physalacriaceae	Armillaria	Armillaria ostoyae	47428
tr|A0A284S962|A0A284S962_9AGAR	A0A284S962	HC	True	186		NA	1	0	p20[28:212]	345	No	No	Armillaria ostoyae	Basidiomycota	Eukaryota	Fungi	Basidiomycota	Agaricomycetes	Agaricales	Physalacriaceae	Armillaria	Armillaria ostoyae	47428
tr|A0A284RGU2|A0A284RGU2_9AGAR	A0A284RGU2	HC	True	170		NA	1	0	p20[31:200]	342	No	No	Armillaria ostoyae	Basidiomycota	Eukaryota	Fungi	Basidiomycota	Agaricomycetes	Agaricales	Physalacriaceae	Armillaria	Armillaria ostoyae	47428
tr|A0A284S794|A0A284S794_9AGAR	A0A284S794	HC	True	191		NA	1	0	p20[135:319]	428	No	No	Armillaria ostoyae	Basidiomycota	Eukaryota	Fungi	Basidiomycota	Agaricomycetes	Agaricales	Physalacriaceae	Armillaria	Armillaria ostoyae	47428
tr|A0A284SA70|A0A284SA70_9AGAR	A0A284SA70	HC	True	180		NA	1	0	p20[124:297]	413	No	No	Armillaria ostoyae	Basidiomycota	Eukaryota	Fungi	Basidiomycota	Agaricomycetes	Agaricales	Physalacriaceae	Armillaria	Armillaria ostoyae	47428
tr|A0A284SA55|A0A284SA55_9AGAR	A0A284SA55	HC	True	169		NA	1	0	p20[110:277]	399	No	No	Armillaria ostoyae	Basidiomycota	Eukaryota	Fungi	Basidiomycota	Agaricomycetes	Agaricales	Physalacriaceae	Armillaria	Armillaria ostoyae	47428
tr|A0A284S3Q8|A0A284S3Q8_9AGAR	A0A284S3Q8	HC	True	153		NA	1	0	p20[55:207]	762	No	No	Armillaria ostoyae	Basidiomycota	Eukaryota	Fungi	Basidiomycota	Agaricomycetes	Agaricales	Physalacriaceae	Armillaria	Armillaria ostoyae	47428
tr|A0A284S8L6|A0A284S8L6_9AGAR	A0A284S8L6	HC	True	188		NA	1	0	p20[468:654]	768	No	No	Armillaria ostoyae	Basidiomycota	Eukaryota	Fungi	Basidiomycota	Agaricomycetes	Agaricales	Physalacriaceae	Armillaria	Armillaria ostoyae	47428
tr|A0A284RMV2|A0A284RMV2_9AGAR	A0A284RMV2	HC	True	166		NA	1	0	p20[213:378]	872	No	No	Armillaria ostoyae	Basidiomycota	Eukaryota	Fungi	Basidiomycota	Agaricomycetes	Agaricales	Physalacriaceae	Armillaria	Armillaria ostoyae	47428
tr|A0A137Q4Y0|A0A137Q4Y0_9AGAR	A0A137Q4Y0	HC	True	181		NA	2	0	p20[100:240]-p20[511:684]	922	No	No	Leucoagaricus sp. SymC.cos	Basidiomycota	Eukaryota	Fungi	Basidiomycota	Agaricomycetes	Agaricales	Agaricaceae	Leucoagaricus	Leucoagaricus sp. SymC.cos	1714833
tr|A0A284S966|A0A284S966_9AGAR	A0A284S966	HC	True	177		NA	1	0	p20[32:208]	334	No	No	Armillaria ostoyae	Basidiomycota	Eukaryota	Fungi	Basidiomycota	Agaricomycetes	Agaricales	Physalacriaceae	Armillaria	Armillaria ostoyae	47428
tr|A0A284S8C0|A0A284S8C0_9AGAR	A0A284S8C0	HC	True	173		NA	1	0	p20[147:319]	437	No	No	Armillaria ostoyae	Basidiomycota	Eukaryota	Fungi	Basidiomycota	Agaricomycetes	Agaricales	Physalacriaceae	Armillaria	Armillaria ostoyae	47428
tr|A0A284RMN5|A0A284RMN5_9AGAR	A0A284RMN5	HC	True	169		NA	1	0	p20[420:588]	1182	No	No	Armillaria ostoyae	Basidiomycota	Eukaryota	Fungi	Basidiomycota	Agaricomycetes	Agaricales	Physalacriaceae	Armillaria	Armillaria ostoyae	47428
tr|A0A284RVU3|A0A284RVU3_9AGAR	A0A284RVU3	HC	True	165		NA	1	0	p20[103:267]	412	No	No	Armillaria ostoyae	Basidiomycota	Eukaryota	Fungi	Basidiomycota	Agaricomycetes	Agaricales	Physalacriaceae	Armillaria	Armillaria ostoyae	47428
tr|A0A284RVA1|A0A284RVA1_9AGAR	A0A284RVA1	HC	True	182		NA	1	0	p20[115:296]	414	No	No	Armillaria ostoyae	Basidiomycota	Eukaryota	Fungi	Basidiomycota	Agaricomycetes	Agaricales	Physalacriaceae	Armillaria	Armillaria ostoyae	47428
tr|A0A284QX84|A0A284QX84_9AGAR	A0A284QX84	HC	True	173		NA	2	0	p20[171:343]-p20[461:616]	752	No	No	Armillaria ostoyae	Basidiomycota	Eukaryota	Fungi	Basidiomycota	Agaricomycetes	Agaricales	Physalacriaceae	Armillaria	Armillaria ostoyae	47428
tr|A0A284S9T0|A0A284S9T0_9AGAR	A0A284S9T0	HC	True	172		NA	1	0	p20[33:204]	353	No	No	Armillaria ostoyae	Basidiomycota	Eukaryota	Fungi	Basidiomycota	Agaricomycetes	Agaricales	Physalacriaceae	Armillaria	Armillaria ostoyae	47428
tr|A0A284RBS1|A0A284RBS1_9AGAR	A0A284RBS1	HC	True	162		NA	1	0	p20[20:181]	398	No	No	Armillaria ostoyae	Basidiomycota	Eukaryota	Fungi	Basidiomycota	Agaricomycetes	Agaricales	Physalacriaceae	Armillaria	Armillaria ostoyae	47428
tr|A0A284RYS0|A0A284RYS0_9AGAR	A0A284RYS0	HC	True	174		NA	1	0	p20[153:326]	448	No	No	Armillaria ostoyae	Basidiomycota	Eukaryota	Fungi	Basidiomycota	Agaricomycetes	Agaricales	Physalacriaceae	Armillaria	Armillaria ostoyae	47428
tr|A0A284QX62|A0A284QX62_9AGAR	A0A284QX62	HC	True	192		NA	1	0	p20[110:301]	404	No	No	Armillaria ostoyae	Basidiomycota	Eukaryota	Fungi	Basidiomycota	Agaricomycetes	Agaricales	Physalacriaceae	Armillaria	Armillaria ostoyae	47428
tr|A0A137QUQ9|A0A137QUQ9_9AGAR	A0A137QUQ9	HC	True	160		NA	1	0	p20[6:165]	648	No	No	Leucoagaricus sp. SymC.cos	Basidiomycota	Eukaryota	Fungi	Basidiomycota	Agaricomycetes	Agaricales	Agaricaceae	Leucoagaricus	Leucoagaricus sp. SymC.cos	1714833
tr|A0A284S8B8|A0A284S8B8_9AGAR	A0A284S8B8	HC	True	188		NA	1	0	p20[108:295]	405	No	No	Armillaria ostoyae	Basidiomycota	Eukaryota	Fungi	Basidiomycota	Agaricomycetes	Agaricales	Physalacriaceae	Armillaria	Armillaria ostoyae	47428
tr|A0A284SA45|A0A284SA45_9AGAR	A0A284SA45	HC	True	170		NA	1	0	p20[70:239]	249	No	No	Armillaria ostoyae	Basidiomycota	Eukaryota	Fungi	Basidiomycota	Agaricomycetes	Agaricales	Physalacriaceae	Armillaria	Armillaria ostoyae	47428
tr|A0A284S295|A0A284S295_9AGAR	A0A284S295	HC	True	197		NA	1	0	p20[176:371]	482	No	No	Armillaria ostoyae	Basidiomycota	Eukaryota	Fungi	Basidiomycota	Agaricomycetes	Agaricales	Physalacriaceae	Armillaria	Armillaria ostoyae	47428
tr|A0A284RVZ3|A0A284RVZ3_9AGAR	A0A284RVZ3	NG	Pseudo	174		NA	1	0	p20[124:297]	383	No	No	Armillaria ostoyae	Basidiomycota	Eukaryota	Fungi	Basidiomycota	Agaricomycetes	Agaricales	Physalacriaceae	Armillaria	Armillaria ostoyae	47428
tr|A0A284RN31|A0A284RN31_9AGAR	A0A284RN31	HC	True	175		NA	1	0	p20[73:241]	825	No	No	Armillaria ostoyae	Basidiomycota	Eukaryota	Fungi	Basidiomycota	Agaricomycetes	Agaricales	Physalacriaceae	Armillaria	Armillaria ostoyae	47428
tr|A0A284S8G2|A0A284S8G2_9AGAR	A0A284S8G2	HC	True	168		NA	1	0	p20[150:317]	441	No	No	Armillaria ostoyae	Basidiomycota	Eukaryota	Fungi	Basidiomycota	Agaricomycetes	Agaricales	Physalacriaceae	Armillaria	Armillaria ostoyae	47428
tr|A0A284QX07|A0A284QX07_9AGAR	A0A284QX07	HC	True	184		NA	1	0	p20[75:257]	366	No	No	Armillaria ostoyae	Basidiomycota	Eukaryota	Fungi	Basidiomycota	Agaricomycetes	Agaricales	Physalacriaceae	Armillaria	Armillaria ostoyae	47428
tr|A0A284RK83|A0A284RK83_9AGAR	A0A284RK83	HC	True	167		NA	1	0	p20[172:338]	467	No	No	Armillaria ostoyae	Basidiomycota	Eukaryota	Fungi	Basidiomycota	Agaricomycetes	Agaricales	Physalacriaceae	Armillaria	Armillaria ostoyae	47428
tr|A0A284S8B2|A0A284S8B2_9AGAR	A0A284S8B2	HC	True	172		NA	1	0	p20[141:312]	431	No	No	Armillaria ostoyae	Basidiomycota	Eukaryota	Fungi	Basidiomycota	Agaricomycetes	Agaricales	Physalacriaceae	Armillaria	Armillaria ostoyae	47428
tr|A0A284RGW5|A0A284RGW5_9AGAR	A0A284RGW5	HC	True	158		NA	1	0	p20[110:267]	1066	No	No	Armillaria ostoyae	Basidiomycota	Eukaryota	Fungi	Basidiomycota	Agaricomycetes	Agaricales	Physalacriaceae	Armillaria	Armillaria ostoyae	47428
tr|A0A284RJH9|A0A284RJH9_9AGAR	A0A284RJH9	HC	True	192		NA	1	0	p20[205:396]	516	No	No	Armillaria ostoyae	Basidiomycota	Eukaryota	Fungi	Basidiomycota	Agaricomycetes	Agaricales	Physalacriaceae	Armillaria	Armillaria ostoyae	47428
tr|A0A284RPC7|A0A284RPC7_9AGAR	A0A284RPC7	HC	True	182		NA	1	0	p20[42:218]	324	No	No	Armillaria ostoyae	Basidiomycota	Eukaryota	Fungi	Basidiomycota	Agaricomycetes	Agaricales	Physalacriaceae	Armillaria	Armillaria ostoyae	47428
tr|A0A284R3Q7|A0A284R3Q7_9AGAR	A0A284R3Q7	HC	True	169		NA	1	0	p20[131:298]	436	No	No	Armillaria ostoyae	Basidiomycota	Eukaryota	Fungi	Basidiomycota	Agaricomycetes	Agaricales	Physalacriaceae	Armillaria	Armillaria ostoyae	47428
tr|A0A284RJR4|A0A284RJR4_9AGAR	A0A284RJR4	YC	Pseudo	155		NA	1	0	p20[454:608]	1110	No	No	Armillaria ostoyae	Basidiomycota	Eukaryota	Fungi	Basidiomycota	Agaricomycetes	Agaricales	Physalacriaceae	Armillaria	Armillaria ostoyae	47428
tr|A0A284RMU0|A0A284RMU0_9AGAR	A0A284RMU0	HC	True	170		NA	1	0	p20[30:199]	797	No	No	Armillaria ostoyae	Basidiomycota	Eukaryota	Fungi	Basidiomycota	Agaricomycetes	Agaricales	Physalacriaceae	Armillaria	Armillaria ostoyae	47428
tr|A0A284R3Q0|A0A284R3Q0_9AGAR	A0A284R3Q0	HS	Pseudo	183		NA	1	0	p20[90:268]	394	No	No	Armillaria ostoyae	Basidiomycota	Eukaryota	Fungi	Basidiomycota	Agaricomycetes	Agaricales	Physalacriaceae	Armillaria	Armillaria ostoyae	47428
tr|A0A284SCF0|A0A284SCF0_9AGAR	A0A284SCF0	DC	Pseudo	162		NA	1	0	p20[135:289]	401	No	No	Armillaria ostoyae	Basidiomycota	Eukaryota	Fungi	Basidiomycota	Agaricomycetes	Agaricales	Physalacriaceae	Armillaria	Armillaria ostoyae	47428
tr|A0A284SCV2|A0A284SCV2_9AGAR	A0A284SCV2	HC	True	177		NA	1	0	p20[149:325]	441	No	No	Armillaria ostoyae	Basidiomycota	Eukaryota	Fungi	Basidiomycota	Agaricomycetes	Agaricales	Physalacriaceae	Armillaria	Armillaria ostoyae	47428
tr|A0A284SAK8|A0A284SAK8_9AGAR	A0A284SAK8	HC	True	165		NA	1	0	p20[2:160]	273	No	No	Armillaria ostoyae	Basidiomycota	Eukaryota	Fungi	Basidiomycota	Agaricomycetes	Agaricales	Physalacriaceae	Armillaria	Armillaria ostoyae	47428
tr|A0A284S8E8|A0A284S8E8_9AGAR	A0A284S8E8	HC	True	178		NA	1	0	p20[132:309]	333	No	No	Armillaria ostoyae	Basidiomycota	Eukaryota	Fungi	Basidiomycota	Agaricomycetes	Agaricales	Physalacriaceae	Armillaria	Armillaria ostoyae	47428
tr|A0A284S289|A0A284S289_9AGAR	A0A284S289	HC	True	119		NA	1	0	p20[15:132]	211	No	No	Armillaria ostoyae	Basidiomycota	Eukaryota	Fungi	Basidiomycota	Agaricomycetes	Agaricales	Physalacriaceae	Armillaria	Armillaria ostoyae	47428
tr|A0A284RP96|A0A284RP96_9AGAR	A0A284RP96	HC	True	195		NA	1	0	p20[97:291]	399	No	No	Armillaria ostoyae	Basidiomycota	Eukaryota	Fungi	Basidiomycota	Agaricomycetes	Agaricales	Physalacriaceae	Armillaria	Armillaria ostoyae	47428
tr|A0A284SA54|A0A284SA54_9AGAR	A0A284SA54	HC	True	147		NA	1	0	p20[1:143]	266	No	No	Armillaria ostoyae	Basidiomycota	Eukaryota	Fungi	Basidiomycota	Agaricomycetes	Agaricales	Physalacriaceae	Armillaria	Armillaria ostoyae	47428
tr|A0A284RV99|A0A284RV99_9AGAR	A0A284RV99	HC	True	182		NA	1	0	p20[209:390]	507	No	No	Armillaria ostoyae	Basidiomycota	Eukaryota	Fungi	Basidiomycota	Agaricomycetes	Agaricales	Physalacriaceae	Armillaria	Armillaria ostoyae	47428
tr|A0A284RV83|A0A284RV83_9AGAR	A0A284RV83	HC	True	181		NA	1	0	p20[183:363]	479	No	No	Armillaria ostoyae	Basidiomycota	Eukaryota	Fungi	Basidiomycota	Agaricomycetes	Agaricales	Physalacriaceae	Armillaria	Armillaria ostoyae	47428
tr|A0A284SA80|A0A284SA80_9AGAR	A0A284SA80	HC	True	171		NA	1	0	p20[123:291]	412	No	No	Armillaria ostoyae	Basidiomycota	Eukaryota	Fungi	Basidiomycota	Agaricomycetes	Agaricales	Physalacriaceae	Armillaria	Armillaria ostoyae	47428
tr|A0A284RVE9|A0A284RVE9_9AGAR	A0A284RVE9	HA	Pseudo	190		NA	1	0	p20[296:485]	648	No	No	Armillaria ostoyae	Basidiomycota	Eukaryota	Fungi	Basidiomycota	Agaricomycetes	Agaricales	Physalacriaceae	Armillaria	Armillaria ostoyae	47428
tr|A0A284R5H8|A0A284R5H8_9AGAR	A0A284R5H8	HC	True	173		NA	1	0	p20[293:465]	585	No	No	Armillaria ostoyae	Basidiomycota	Eukaryota	Fungi	Basidiomycota	Agaricomycetes	Agaricales	Physalacriaceae	Armillaria	Armillaria ostoyae	47428
tr|A0A284S898|A0A284S898_9AGAR	A0A284S898	HC	True	178		NA	1	0	p20[101:278]	391	No	No	Armillaria ostoyae	Basidiomycota	Eukaryota	Fungi	Basidiomycota	Agaricomycetes	Agaricales	Physalacriaceae	Armillaria	Armillaria ostoyae	47428
tr|A0A284R6E8|A0A284R6E8_9AGAR	A0A284R6E8	HC	True	167		NA	2	0	p20[206:372]-p20[597:759]	886	No	No	Armillaria ostoyae	Basidiomycota	Eukaryota	Fungi	Basidiomycota	Agaricomycetes	Agaricales	Physalacriaceae	Armillaria	Armillaria ostoyae	47428
tr|A0A284QRK4|A0A284QRK4_9AGAR	A0A284QRK4	HC	True	170		NA	1	0	p20[686:853]	970	No	No	Armillaria ostoyae	Basidiomycota	Eukaryota	Fungi	Basidiomycota	Agaricomycetes	Agaricales	Physalacriaceae	Armillaria	Armillaria ostoyae	47428
tr|A0A284QS69|A0A284QS69_9AGAR	A0A284QS69	HC	True	169		NA	1	0	p20[91:254]	379	No	No	Armillaria ostoyae	Basidiomycota	Eukaryota	Fungi	Basidiomycota	Agaricomycetes	Agaricales	Physalacriaceae	Armillaria	Armillaria ostoyae	47428
tr|A0A284QK25|A0A284QK25_9AGAR	A0A284QK25	HC	True	169		NA	1	0	p20[35:202]	324	No	No	Armillaria ostoyae	Basidiomycota	Eukaryota	Fungi	Basidiomycota	Agaricomycetes	Agaricales	Physalacriaceae	Armillaria	Armillaria ostoyae	47428
tr|A0A284S2C8|A0A284S2C8_9AGAR	A0A284S2C8	SC	Pseudo	164		NA	1	0	p20[298:461]	553	No	No	Armillaria ostoyae	Basidiomycota	Eukaryota	Fungi	Basidiomycota	Agaricomycetes	Agaricales	Physalacriaceae	Armillaria	Armillaria ostoyae	47428
tr|A0A284RVD0|A0A284RVD0_9AGAR	A0A284RVD0	HS	Pseudo	170		NA	1	0	p20[176:345]	458	No	No	Armillaria ostoyae	Basidiomycota	Eukaryota	Fungi	Basidiomycota	Agaricomycetes	Agaricales	Physalacriaceae	Armillaria	Armillaria ostoyae	47428
tr|A0A284SA43|A0A284SA43_9AGAR	A0A284SA43	HC	True	185		NA	1	0	p20[68:252]	403	No	No	Armillaria ostoyae	Basidiomycota	Eukaryota	Fungi	Basidiomycota	Agaricomycetes	Agaricales	Physalacriaceae	Armillaria	Armillaria ostoyae	47428
tr|A0A284RVV1|A0A284RVV1_9AGAR	A0A284RVV1	LG	Pseudo	170		NA	1	0	p20[45:214]	346	No	No	Armillaria ostoyae	Basidiomycota	Eukaryota	Fungi	Basidiomycota	Agaricomycetes	Agaricales	Physalacriaceae	Armillaria	Armillaria ostoyae	47428
tr|A0A284RCI3|A0A284RCI3_9AGAR	A0A284RCI3	HC	True	159		NA	1	0	p20[36:188]	685	No	No	Armillaria ostoyae	Basidiomycota	Eukaryota	Fungi	Basidiomycota	Agaricomycetes	Agaricales	Physalacriaceae	Armillaria	Armillaria ostoyae	47428
tr|A0A284S3P1|A0A284S3P1_9AGAR	A0A284S3P1	HC	True	158		NA	1	0	p20[48:204]	696	No	No	Armillaria ostoyae	Basidiomycota	Eukaryota	Fungi	Basidiomycota	Agaricomycetes	Agaricales	Physalacriaceae	Armillaria	Armillaria ostoyae	47428
tr|A0A284SAG1|A0A284SAG1_9AGAR	A0A284SAG1	HC	True	177		NA	1	0	p20[92:268]	389	No	No	Armillaria ostoyae	Basidiomycota	Eukaryota	Fungi	Basidiomycota	Agaricomycetes	Agaricales	Physalacriaceae	Armillaria	Armillaria ostoyae	47428
tr|A0A284RPB1|A0A284RPB1_9AGAR	A0A284RPB1	HC	True	180		NA	1	0	p20[49:228]	347	No	No	Armillaria ostoyae	Basidiomycota	Eukaryota	Fungi	Basidiomycota	Agaricomycetes	Agaricales	Physalacriaceae	Armillaria	Armillaria ostoyae	47428
tr|A0A284RGU4|A0A284RGU4_9AGAR	A0A284RGU4	HC	True	177		NA	1	0	p20[37:207]	360	No	No	Armillaria ostoyae	Basidiomycota	Eukaryota	Fungi	Basidiomycota	Agaricomycetes	Agaricales	Physalacriaceae	Armillaria	Armillaria ostoyae	47428
tr|A0A284S0Q7|A0A284S0Q7_9AGAR	A0A284S0Q7	YC	Pseudo	162		NA	1	0	p20[158:319]	434	No	No	Armillaria ostoyae	Basidiomycota	Eukaryota	Fungi	Basidiomycota	Agaricomycetes	Agaricales	Physalacriaceae	Armillaria	Armillaria ostoyae	47428
tr|A0A137Q2A4|A0A137Q2A4_9AGAR	A0A137Q2A4	HC	True	167		NA	1	0	p20[149:315]	385	No	No	Leucoagaricus sp. SymC.cos	Basidiomycota	Eukaryota	Fungi	Basidiomycota	Agaricomycetes	Agaricales	Agaricaceae	Leucoagaricus	Leucoagaricus sp. SymC.cos	1714833
tr|A0A284S9W6|A0A284S9W6_9AGAR	A0A284S9W6	HC	True	172		NA	1	0	p20[33:203]	397	No	No	Armillaria ostoyae	Basidiomycota	Eukaryota	Fungi	Basidiomycota	Agaricomycetes	Agaricales	Physalacriaceae	Armillaria	Armillaria ostoyae	47428
tr|A0A284SA39|A0A284SA39_9AGAR	A0A284SA39	HC	True	171		NA	1	0	p20[142:312]	443	No	No	Armillaria ostoyae	Basidiomycota	Eukaryota	Fungi	Basidiomycota	Agaricomycetes	Agaricales	Physalacriaceae	Armillaria	Armillaria ostoyae	47428
tr|A0A284RH30|A0A284RH30_9AGAR	A0A284RH30	FC	Pseudo	165		NA	1	0	p20[239:403]	527	No	No	Armillaria ostoyae	Basidiomycota	Eukaryota	Fungi	Basidiomycota	Agaricomycetes	Agaricales	Physalacriaceae	Armillaria	Armillaria ostoyae	47428
tr|A0A284S8B7|A0A284S8B7_9AGAR	A0A284S8B7	HY	Pseudo	161		NA	1	0	p20[120:278]	404	No	No	Armillaria ostoyae	Basidiomycota	Eukaryota	Fungi	Basidiomycota	Agaricomycetes	Agaricales	Physalacriaceae	Armillaria	Armillaria ostoyae	47428
tr|A0A284SA89|A0A284SA89_9AGAR	A0A284SA89	HC	True	171		NA	1	0	p20[131:301]	426	No	No	Armillaria ostoyae	Basidiomycota	Eukaryota	Fungi	Basidiomycota	Agaricomycetes	Agaricales	Physalacriaceae	Armillaria	Armillaria ostoyae	47428
tr|A0A166SAH7|A0A166SAH7_9HOMO	A0A166SAH7	HC	True	160		NA	1	0	p20[5:164]	267	No	No	Fibularhizoctonia sp. CBS 109695	Basidiomycota	Eukaryota	Fungi	Basidiomycota	Agaricomycetes	Atheliales	Atheliaceae	Fibularhizoctonia	Fibularhizoctonia sp. CBS 109695	436010
tr|A0A166F0Q6|A0A166F0Q6_9HOMO	A0A166F0Q6	HC	True	165		NA	1	0	p20[192:351]	828	No	No	Fibularhizoctonia sp. CBS 109695	Basidiomycota	Eukaryota	Fungi	Basidiomycota	Agaricomycetes	Atheliales	Atheliaceae	Fibularhizoctonia	Fibularhizoctonia sp. CBS 109695	436010
tr|A0A167XP48|A0A167XP48_9HOMO	A0A167XP48	HC	True	161		NA	1	0	p20[113:272]	717	No	No	Fibularhizoctonia sp. CBS 109695	Basidiomycota	Eukaryota	Fungi	Basidiomycota	Agaricomycetes	Atheliales	Atheliaceae	Fibularhizoctonia	Fibularhizoctonia sp. CBS 109695	436010
tr|A0A166EJ88|A0A166EJ88_9HOMO	A0A166EJ88	HC	True	158		NA	1	0	p20[54:211]	700	No	No	Fibularhizoctonia sp. CBS 109695	Basidiomycota	Eukaryota	Fungi	Basidiomycota	Agaricomycetes	Atheliales	Atheliaceae	Fibularhizoctonia	Fibularhizoctonia sp. CBS 109695	436010
tr|R7RW42|R7RW42_STEHR	R7RW42	HC	True	163		NA	1	0	p20[37:199]	698	No	No	Stereum hirsutum FP-91666 SS1	Basidiomycota	Eukaryota	Fungi	Basidiomycota	Agaricomycetes	Russulales	Stereaceae	Stereum	Stereum hirsutum	721885
tr|A0A166LFI1|A0A166LFI1_9HOMO	A0A166LFI1	HC	True	165		NA	1	0	p20[203:362]	839	No	No	Fibularhizoctonia sp. CBS 109695	Basidiomycota	Eukaryota	Fungi	Basidiomycota	Agaricomycetes	Atheliales	Atheliaceae	Fibularhizoctonia	Fibularhizoctonia sp. CBS 109695	436010
tr|A0A166EWL3|A0A166EWL3_9HOMO	A0A166EWL3	HC	True	158		NA	1	0	p20[232:389]	874	No	No	Fibularhizoctonia sp. CBS 109695	Basidiomycota	Eukaryota	Fungi	Basidiomycota	Agaricomycetes	Atheliales	Atheliaceae	Fibularhizoctonia	Fibularhizoctonia sp. CBS 109695	436010
tr|A0A166F140|A0A166F140_9HOMO	A0A166F140	HC	True	167		NA	1	0	p20[236:402]	876	No	No	Fibularhizoctonia sp. CBS 109695	Basidiomycota	Eukaryota	Fungi	Basidiomycota	Agaricomycetes	Atheliales	Atheliaceae	Fibularhizoctonia	Fibularhizoctonia sp. CBS 109695	436010
tr|A0A319AQ40|A0A319AQ40_9EURO	A0A319AQ40	HC	True	141		NA	1	0	p20[19:155]	652	No	No	Aspergillus lacticoffeatus CBS 101883	Ascomycota	Eukaryota	Fungi	Ascomycota	Eurotiomycetes	Eurotiales	Aspergillaceae	Aspergillus	Aspergillus lacticoffeatus	1450533
tr|A0A166MPY0|A0A166MPY0_9HOMO	A0A166MPY0	HC	True	164		NA	1	0	p20[58:221]	703	No	No	Fibularhizoctonia sp. CBS 109695	Basidiomycota	Eukaryota	Fungi	Basidiomycota	Agaricomycetes	Atheliales	Atheliaceae	Fibularhizoctonia	Fibularhizoctonia sp. CBS 109695	436010
tr|A0A166SAK6|A0A166SAK6_9HOMO	A0A166SAK6	HC	True	159		NA	1	0	p20[50:208]	698	No	No	Fibularhizoctonia sp. CBS 109695	Basidiomycota	Eukaryota	Fungi	Basidiomycota	Agaricomycetes	Atheliales	Atheliaceae	Fibularhizoctonia	Fibularhizoctonia sp. CBS 109695	436010
tr|R7RWG3|R7RWG3_STEHR	R7RWG3	HG	Pseudo	149		NA	1	0	p20[32:180]	756	No	No	Stereum hirsutum FP-91666 SS1	Basidiomycota	Eukaryota	Fungi	Basidiomycota	Agaricomycetes	Russulales	Stereaceae	Stereum	Stereum hirsutum	721885
tr|A0A166LFG3|A0A166LFG3_9HOMO	A0A166LFG3	HC	True	167		NA	1	0	p20[197:363]	828	No	No	Fibularhizoctonia sp. CBS 109695	Basidiomycota	Eukaryota	Fungi	Basidiomycota	Agaricomycetes	Atheliales	Atheliaceae	Fibularhizoctonia	Fibularhizoctonia sp. CBS 109695	436010
tr|A0A166E7Q3|A0A166E7Q3_9HOMO	A0A166E7Q3	HC	True	193		NA	1	0	p20[77:268]	533	No	No	Fibularhizoctonia sp. CBS 109695	Basidiomycota	Eukaryota	Fungi	Basidiomycota	Agaricomycetes	Atheliales	Atheliaceae	Fibularhizoctonia	Fibularhizoctonia sp. CBS 109695	436010
tr|A0A166D1D7|A0A166D1D7_9HOMO	A0A166D1D7	HC	True	172		NA	1	0	p20[56:227]	470	No	No	Fibularhizoctonia sp. CBS 109695	Basidiomycota	Eukaryota	Fungi	Basidiomycota	Agaricomycetes	Atheliales	Atheliaceae	Fibularhizoctonia	Fibularhizoctonia sp. CBS 109695	436010
tr|A0A319B035|A0A319B035_9EURO	A0A319B035	HC	True	167		NA	1	0	p20[4:170]	667	No	No	Aspergillus lacticoffeatus CBS 101883	Ascomycota	Eukaryota	Fungi	Ascomycota	Eurotiomycetes	Eurotiales	Aspergillaceae	Aspergillus	Aspergillus lacticoffeatus	1450533
tr|R7RYP6|R7RYP6_STEHR	R7RYP6	HC	True	121		NA	1	0	p20[10:130]	626	No	No	Stereum hirsutum FP-91666 SS1	Basidiomycota	Eukaryota	Fungi	Basidiomycota	Agaricomycetes	Russulales	Stereaceae	Stereum	Stereum hirsutum	721885
tr|R7RXB1|R7RXB1_STEHR	R7RXB1	HC	True	172		NA	1	0	p20[31:201]	703	No	No	Stereum hirsutum FP-91666 SS1	Basidiomycota	Eukaryota	Fungi	Basidiomycota	Agaricomycetes	Russulales	Stereaceae	Stereum	Stereum hirsutum	721885
tr|K5W1K7|K5W1K7_PHACS	K5W1K7	HC	True	185		NA	1	0	p20[35:217]	534	No	No	Phanerochaete carnosa HHB-10118-sp	Basidiomycota	Eukaryota	Fungi	Basidiomycota	Agaricomycetes	Polyporales	Phanerochaetaceae	Phanerochaete	Phanerochaete carnosa	650164
tr|A0A1Y1WU39|A0A1Y1WU39_9FUNG	A0A1Y1WU39	HC	True	163		NA	1	0	p20[52:214]	307	No	No	Anaeromyces robustus	Chytridiomycota	Eukaryota	Fungi	Chytridiomycota	Neocallimastigomycetes	Neocallimastigales	Neocallimastigaceae	Anaeromyces	Anaeromyces robustus	1754192
tr|R7S046|R7S046_STEHR	R7S046	HC	True	159		NA	1	0	p20[3:161]	742	No	No	Stereum hirsutum FP-91666 SS1	Basidiomycota	Eukaryota	Fungi	Basidiomycota	Agaricomycetes	Russulales	Stereaceae	Stereum	Stereum hirsutum	721885
tr|K5WEL5|K5WEL5_PHACS	K5WEL5	HC	True	184		NA	1	0	p20[13:186]	325	No	No	Phanerochaete carnosa HHB-10118-sp	Basidiomycota	Eukaryota	Fungi	Basidiomycota	Agaricomycetes	Polyporales	Phanerochaetaceae	Phanerochaete	Phanerochaete carnosa	650164
tr|K5V602|K5V602_PHACS	K5V602	HC	True	155		NA	1	0	p20[4:156]	295	No	No	Phanerochaete carnosa HHB-10118-sp	Basidiomycota	Eukaryota	Fungi	Basidiomycota	Agaricomycetes	Polyporales	Phanerochaetaceae	Phanerochaete	Phanerochaete carnosa	650164
tr|R7RXF5|R7RXF5_STEHR	R7RXF5	HC	True	150		NA	1	0	p20[43:192]	621	No	No	Stereum hirsutum FP-91666 SS1	Basidiomycota	Eukaryota	Fungi	Basidiomycota	Agaricomycetes	Russulales	Stereaceae	Stereum	Stereum hirsutum	721885
tr|R7RWX5|R7RWX5_STEHR	R7RWX5	YS	Pseudo	156		NA	1	0	p20[51:206]	718	No	No	Stereum hirsutum FP-91666 SS1	Basidiomycota	Eukaryota	Fungi	Basidiomycota	Agaricomycetes	Russulales	Stereaceae	Stereum	Stereum hirsutum	721885
tr|R7RYQ7|R7RYQ7_STEHR	R7RYQ7	HC	True	182		NA	1	0	p20[33:213]	735	No	No	Stereum hirsutum FP-91666 SS1	Basidiomycota	Eukaryota	Fungi	Basidiomycota	Agaricomycetes	Russulales	Stereaceae	Stereum	Stereum hirsutum	721885
tr|K5UWW3|K5UWW3_PHACS	K5UWW3	HC	True	148		NA	1	0	p20[7:154]	648	No	No	Phanerochaete carnosa HHB-10118-sp	Basidiomycota	Eukaryota	Fungi	Basidiomycota	Agaricomycetes	Polyporales	Phanerochaetaceae	Phanerochaete	Phanerochaete carnosa	650164
tr|R7RX79|R7RX79_STEHR	R7RX79	HC	True	162		NA	1	0	p20[41:201]	809	No	No	Stereum hirsutum FP-91666 SS1	Basidiomycota	Eukaryota	Fungi	Basidiomycota	Agaricomycetes	Russulales	Stereaceae	Stereum	Stereum hirsutum	721885
tr|K5WFP0|K5WFP0_PHACS	K5WFP0	HC	True	193		NA	1	0	p20[19:211]	345	No	No	Phanerochaete carnosa HHB-10118-sp	Basidiomycota	Eukaryota	Fungi	Basidiomycota	Agaricomycetes	Polyporales	Phanerochaetaceae	Phanerochaete	Phanerochaete carnosa	650164
tr|K5W2M8|K5W2M8_PHACS	K5W2M8	HC	True	174		NA	1	0	p20[4:176]	305	No	No	Phanerochaete carnosa HHB-10118-sp	Basidiomycota	Eukaryota	Fungi	Basidiomycota	Agaricomycetes	Polyporales	Phanerochaetaceae	Phanerochaete	Phanerochaete carnosa	650164
tr|A0A166D009|A0A166D009_9HOMO	A0A166D009	HC	True	175		NA	1	0	p20[11:185]	403	No	No	Fibularhizoctonia sp. CBS 109695	Basidiomycota	Eukaryota	Fungi	Basidiomycota	Agaricomycetes	Atheliales	Atheliaceae	Fibularhizoctonia	Fibularhizoctonia sp. CBS 109695	436010
tr|A0A166E7P3|A0A166E7P3_9HOMO	A0A166E7P3	HC	True	160		NA	1	0	p20[88:247]	585	No	No	Fibularhizoctonia sp. CBS 109695	Basidiomycota	Eukaryota	Fungi	Basidiomycota	Agaricomycetes	Atheliales	Atheliaceae	Fibularhizoctonia	Fibularhizoctonia sp. CBS 109695	436010
tr|K5WFP4|K5WFP4_PHACS	K5WFP4	PC	Pseudo	148		NA	1	0	p20[10:157]	342	No	No	Phanerochaete carnosa HHB-10118-sp	Basidiomycota	Eukaryota	Fungi	Basidiomycota	Agaricomycetes	Polyporales	Phanerochaetaceae	Phanerochaete	Phanerochaete carnosa	650164
tr|A0A1M2V424|A0A1M2V424_TRAPU	A0A1M2V424	HC	True	183		NA	1	0	p20[12:183]	1011	No	No	Trametes pubescens	Basidiomycota	Eukaryota	Fungi	Basidiomycota	Agaricomycetes	Polyporales	Polyporaceae	Trametes	Trametes pubescens	154538
tr|A0A2H3S9Q0|A0A2H3S9Q0_GIBFU	A0A2H3S9Q0	HC	True	166		NA	1	0	p20[2:167]	656	No	No	Fusarium fujikuroi	Ascomycota	Eukaryota	Fungi	Ascomycota	Sordariomycetes	Hypocreales	Nectriaceae	Fusarium	Fusarium fujikuroi	5127
tr|A0A0J0CPX9|A0A0J0CPX9_GIBFU	A0A0J0CPX9	HC	True	171		NA	1	0	p20[10:180]	669	No	No	Fusarium fujikuroi	Ascomycota	Eukaryota	Fungi	Ascomycota	Sordariomycetes	Hypocreales	Nectriaceae	Fusarium	Fusarium fujikuroi	5127
tr|A0A0I9YEE0|A0A0I9YEE0_GIBFU	A0A0I9YEE0	HC	True	156		NA	1	0	p20[12:167]	661	No	No	Fusarium fujikuroi	Ascomycota	Eukaryota	Fungi	Ascomycota	Sordariomycetes	Hypocreales	Nectriaceae	Fusarium	Fusarium fujikuroi	5127
tr|A0A1M2VKB4|A0A1M2VKB4_TRAPU	A0A1M2VKB4	HC	True	188		NA	1	0	p20[24:211]	405	No	No	Trametes pubescens	Basidiomycota	Eukaryota	Fungi	Basidiomycota	Agaricomycetes	Polyporales	Polyporaceae	Trametes	Trametes pubescens	154538
tr|A0A1V6PAG3|A0A1V6PAG3_9EURO	A0A1V6PAG3	HC	True	115		NA	1	0	p20[65:179]	749	No	No	Penicillium decumbens	Ascomycota	Eukaryota	Fungi	Ascomycota	Eurotiomycetes	Eurotiales	Aspergillaceae	Penicillium	Penicillium decumbens	69771
tr|B0DA73|B0DA73_LACBS	B0DA73	HC	True	141		NA	2	0	p20[61:201]-p20[861:1005]	1493	No	No	Laccaria bicolor S238N-H82	Basidiomycota	Eukaryota	Fungi	Basidiomycota	Agaricomycetes	Agaricales	Tricholomataceae	Laccaria	Laccaria bicolor	486041
tr|A0A0D0BYQ5|A0A0D0BYQ5_9AGAR	A0A0D0BYQ5	HC	True	160		NA	1	0	p20[31:188]	688	No	No	Gymnopus luxurians FD-317 M1	Basidiomycota	Eukaryota	Fungi	Basidiomycota	Agaricomycetes	Agaricales	Omphalotaceae	Gymnopus	Gymnopus luxurians	944289
tr|B0CTE2|B0CTE2_LACBS	B0CTE2	HC	True	161		NA	1	0	p20[263:423]	1254	No	No	Laccaria bicolor S238N-H82	Basidiomycota	Eukaryota	Fungi	Basidiomycota	Agaricomycetes	Agaricales	Tricholomataceae	Laccaria	Laccaria bicolor	486041
tr|A0A370P9N8|A0A370P9N8_ASPPH	A0A370P9N8	HC	True	165		NA	1	0	p20[4:168]	560	No	No	Aspergillus phoenicis ATCC 13157	Ascomycota	Eukaryota	Fungi	Ascomycota	Eurotiomycetes	Eurotiales	Aspergillaceae	Aspergillus	Aspergillus phoenicis	1353007
tr|B0E252|B0E252_LACBS	B0E252	HC	True	166		NA	1	0	p20[53:217]	703	No	No	Laccaria bicolor S238N-H82	Basidiomycota	Eukaryota	Fungi	Basidiomycota	Agaricomycetes	Agaricales	Tricholomataceae	Laccaria	Laccaria bicolor	486041
tr|A0A0D0BDS7|A0A0D0BDS7_9AGAR	A0A0D0BDS7	HC	True	156		NA	1	0	p20[57:212]	712	No	No	Gymnopus luxurians FD-317 M1	Basidiomycota	Eukaryota	Fungi	Basidiomycota	Agaricomycetes	Agaricales	Omphalotaceae	Gymnopus	Gymnopus luxurians	944289
tr|A0A0D0D0V8|A0A0D0D0V8_9AGAR	A0A0D0D0V8	HC	True	182		NA	1	0	p20[23:204]	682	No	No	Gymnopus luxurians FD-317 M1	Basidiomycota	Eukaryota	Fungi	Basidiomycota	Agaricomycetes	Agaricales	Omphalotaceae	Gymnopus	Gymnopus luxurians	944289
tr|A0A0D0C8K1|A0A0D0C8K1_9AGAR	A0A0D0C8K1	YS	Pseudo	135		NA	1	0	p20[6:140]	450	No	No	Gymnopus luxurians FD-317 M1	Basidiomycota	Eukaryota	Fungi	Basidiomycota	Agaricomycetes	Agaricales	Omphalotaceae	Gymnopus	Gymnopus luxurians	944289
tr|A0A0D0CTD4|A0A0D0CTD4_9AGAR	A0A0D0CTD4	HC	True	168		NA	1	0	p20[23:190]	739	No	No	Gymnopus luxurians FD-317 M1	Basidiomycota	Eukaryota	Fungi	Basidiomycota	Agaricomycetes	Agaricales	Omphalotaceae	Gymnopus	Gymnopus luxurians	944289
tr|B0DLC5|B0DLC5_LACBS	B0DLC5	HC	True	165		NA	1	0	p20[81:245]	763	No	No	Laccaria bicolor S238N-H82	Basidiomycota	Eukaryota	Fungi	Basidiomycota	Agaricomycetes	Agaricales	Tricholomataceae	Laccaria	Laccaria bicolor	486041
tr|X0LIA6|X0LIA6_FUSOX	X0LIA6	HC	True	158		NA	1	0	p20[121:278]	367	No	No	Fusarium oxysporum f. sp. vasinfectum 25433	Ascomycota	Eukaryota	Fungi	Ascomycota	Sordariomycetes	Hypocreales	Nectriaceae	Fusarium	Fusarium oxysporum	1089449
tr|X0LHG6|X0LHG6_FUSOX	X0LHG6	HC	True	158		NA	1	0	p20[10:167]	675	No	No	Fusarium oxysporum f. sp. vasinfectum 25433	Ascomycota	Eukaryota	Fungi	Ascomycota	Sordariomycetes	Hypocreales	Nectriaceae	Fusarium	Fusarium oxysporum	1089449
tr|B0DAH2|B0DAH2_LACBS	B0DAH2	HC	True	185		NA	1	0	p20[76:260]	725	No	No	Laccaria bicolor S238N-H82	Basidiomycota	Eukaryota	Fungi	Basidiomycota	Agaricomycetes	Agaricales	Tricholomataceae	Laccaria	Laccaria bicolor	486041
tr|A0A072P0V8|A0A072P0V8_9EURO	A0A072P0V8	HC	True	172		NA	1	0	p20[9:180]	669	No	No	Exophiala aquamarina CBS 119918	Ascomycota	Eukaryota	Fungi	Ascomycota	Eurotiomycetes	Chaetothyriales	Herpotrichiellaceae	Exophiala	Exophiala aquamarina	1182545
tr|A0A0D0C8J9|A0A0D0C8J9_9AGAR	A0A0D0C8J9	YS	Pseudo	150		NA	1	0	p20[6:155]	210	No	No	Gymnopus luxurians FD-317 M1	Basidiomycota	Eukaryota	Fungi	Basidiomycota	Agaricomycetes	Agaricales	Omphalotaceae	Gymnopus	Gymnopus luxurians	944289
tr|U1GS45|U1GS45_ENDPU	U1GS45	HC	True	167		NA	1	0	p20[11:173]	630	No	No	Endocarpon pusillum Z07020	Ascomycota	Eukaryota	Fungi	Ascomycota	Eurotiomycetes	Verrucariales	Verrucariaceae	Endocarpon	Endocarpon pusillum	1263415
tr|B0D7N8|B0D7N8_LACBS	B0D7N8	HC	True	151		NA	1	0	p20[90:237]	783	No	No	Laccaria bicolor S238N-H82	Basidiomycota	Eukaryota	Fungi	Basidiomycota	Agaricomycetes	Agaricales	Tricholomataceae	Laccaria	Laccaria bicolor	486041
tr|B0E266|B0E266_LACBS	B0E266	HC	True	148		NA	1	0	p20[50:197]	204	No	No	Laccaria bicolor S238N-H82	Basidiomycota	Eukaryota	Fungi	Basidiomycota	Agaricomycetes	Agaricales	Tricholomataceae	Laccaria	Laccaria bicolor	486041
tr|B0D292|B0D292_LACBS	B0D292	HC	True	156		NA	1	0	p20[123:278]	771	No	No	Laccaria bicolor S238N-H82	Basidiomycota	Eukaryota	Fungi	Basidiomycota	Agaricomycetes	Agaricales	Tricholomataceae	Laccaria	Laccaria bicolor	486041
tr|U1I1C4|U1I1C4_ENDPU	U1I1C4	HC	True	145		NA	1	0	p20[11:155]	537	No	No	Endocarpon pusillum Z07020	Ascomycota	Eukaryota	Fungi	Ascomycota	Eurotiomycetes	Verrucariales	Verrucariaceae	Endocarpon	Endocarpon pusillum	1263415
tr|B0DC80|B0DC80_LACBS	B0DC80	HC	True	150		NA	1	0	p20[402:551]	1019	No	No	Laccaria bicolor S238N-H82	Basidiomycota	Eukaryota	Fungi	Basidiomycota	Agaricomycetes	Agaricales	Tricholomataceae	Laccaria	Laccaria bicolor	486041
tr|B0DC90|B0DC90_LACBS	B0DC90	HC	True	151		NA	1	0	p20[430:580]	1034	No	No	Laccaria bicolor S238N-H82	Basidiomycota	Eukaryota	Fungi	Basidiomycota	Agaricomycetes	Agaricales	Tricholomataceae	Laccaria	Laccaria bicolor	486041
tr|A0A0D0AMX4|A0A0D0AMX4_9AGAR	A0A0D0AMX4	HC	True	152		NA	1	0	p20[120:271]	474	No	No	Gymnopus luxurians FD-317 M1	Basidiomycota	Eukaryota	Fungi	Basidiomycota	Agaricomycetes	Agaricales	Omphalotaceae	Gymnopus	Gymnopus luxurians	944289
tr|X0L846|X0L846_FUSOX	X0L846	HC	True	149		NA	1	0	p20[30:175]	667	No	No	Fusarium oxysporum f. sp. vasinfectum 25433	Ascomycota	Eukaryota	Fungi	Ascomycota	Sordariomycetes	Hypocreales	Nectriaceae	Fusarium	Fusarium oxysporum	1089449
tr|A0A0D0CKB3|A0A0D0CKB3_9AGAR	A0A0D0CKB3	HC	True	165		NA	1	0	p20[6:170]	178	No	No	Gymnopus luxurians FD-317 M1	Basidiomycota	Eukaryota	Fungi	Basidiomycota	Agaricomycetes	Agaricales	Omphalotaceae	Gymnopus	Gymnopus luxurians	944289
tr|A0A075ATH5|A0A075ATH5_9FUNG	A0A075ATH5	HC	True	199		NA	1	0	p20[108:306]	358	No	No	Rozella allomycis CSF55	Cryptomycota	Eukaryota	Fungi	Cryptomycota	NA	NA	NA	Rozella	Rozella allomycis	988480
tr|A0A194VG74|A0A194VG74_9PEZI	A0A194VG74	HC	True	135		NA	1	0	p20[314:448]	906	No	No	Valsa mali var. pyri	Ascomycota	Eukaryota	Fungi	Ascomycota	Sordariomycetes	Diaporthales	Valsaceae	Valsa	Valsa mali	694573
tr|M5G5Q6|M5G5Q6_DACPD	M5G5Q6	HC	True	186		NA	1	0	p20[23:208]	499	No	No	Dacryopinax primogenitus	Basidiomycota	Eukaryota	Fungi	Basidiomycota	Dacrymycetes	Dacrymycetales	Dacrymycetaceae	Dacryopinax	Dacryopinax primogenitus	1858805
tr|M5G762|M5G762_DACPD	M5G762	HS	Pseudo	166		NA	1	0	p20[17:182]	307	No	No	Dacryopinax primogenitus	Basidiomycota	Eukaryota	Fungi	Basidiomycota	Dacrymycetes	Dacrymycetales	Dacrymycetaceae	Dacryopinax	Dacryopinax primogenitus	1858805
tr|A0A067NEX9|A0A067NEX9_PLEOS	A0A067NEX9	HC	True	166		NA	1	0	p20[9:174]	380	No	No	Pleurotus ostreatus PC15	Basidiomycota	Eukaryota	Fungi	Basidiomycota	Agaricomycetes	Agaricales	Pleurotaceae	Pleurotus	Pleurotus ostreatus	1137138
tr|A0A067N577|A0A067N577_PLEOS	A0A067N577	HC	True	156		NA	1	0	p20[11:157]	390	No	No	Pleurotus ostreatus PC15	Basidiomycota	Eukaryota	Fungi	Basidiomycota	Agaricomycetes	Agaricales	Pleurotaceae	Pleurotus	Pleurotus ostreatus	1137138
tr|A0A067NJY9|A0A067NJY9_PLEOS	A0A067NJY9	HC	True	181		NA	1	0	p20[7:168]	655	No	No	Pleurotus ostreatus PC15	Basidiomycota	Eukaryota	Fungi	Basidiomycota	Agaricomycetes	Agaricales	Pleurotaceae	Pleurotus	Pleurotus ostreatus	1137138
tr|A0A067P5K4|A0A067P5K4_PLEOS	A0A067P5K4	HC	True	157		NA	1	0	p20[2:158]	395	No	No	Pleurotus ostreatus PC15	Basidiomycota	Eukaryota	Fungi	Basidiomycota	Agaricomycetes	Agaricales	Pleurotaceae	Pleurotus	Pleurotus ostreatus	1137138
tr|A0A067NUJ8|A0A067NUJ8_PLEOS	A0A067NUJ8	HC	True	153		NA	1	0	p20[8:160]	183	No	No	Pleurotus ostreatus PC15	Basidiomycota	Eukaryota	Fungi	Basidiomycota	Agaricomycetes	Agaricales	Pleurotaceae	Pleurotus	Pleurotus ostreatus	1137138
tr|A0A067NEX4|A0A067NEX4_PLEOS	A0A067NEX4	HC	True	152		NA	1	0	p20[8:155]	380	No	No	Pleurotus ostreatus PC15	Basidiomycota	Eukaryota	Fungi	Basidiomycota	Agaricomycetes	Agaricales	Pleurotaceae	Pleurotus	Pleurotus ostreatus	1137138
tr|A0A067N712|A0A067N712_PLEOS	A0A067N712	EC	Pseudo	137		NA	1	0	p20[8:144]	149	No	No	Pleurotus ostreatus PC15	Basidiomycota	Eukaryota	Fungi	Basidiomycota	Agaricomycetes	Agaricales	Pleurotaceae	Pleurotus	Pleurotus ostreatus	1137138
tr|A0A1L9WT18|A0A1L9WT18_ASPAC	A0A1L9WT18	HC	True	165		NA	1	0	p20[4:168]	640	No	No	Aspergillus aculeatus ATCC 16872	Ascomycota	Eukaryota	Fungi	Ascomycota	Eurotiomycetes	Eurotiales	Aspergillaceae	Aspergillus	Aspergillus aculeatus	690307
tr|A0A1L9WJJ3|A0A1L9WJJ3_ASPAC	A0A1L9WJJ3	HC	True	156		NA	1	0	p20[12:158]	834	No	No	Aspergillus aculeatus ATCC 16872	Ascomycota	Eukaryota	Fungi	Ascomycota	Eurotiomycetes	Eurotiales	Aspergillaceae	Aspergillus	Aspergillus aculeatus	690307
tr|A0A1L9ULC0|A0A1L9ULC0_9EURO	A0A1L9ULC0	HC	True	166		NA	1	0	p20[78:240]	727	No	No	Aspergillus brasiliensis CBS 101740	Ascomycota	Eukaryota	Fungi	Ascomycota	Eurotiomycetes	Eurotiales	Aspergillaceae	Aspergillus	Aspergillus brasiliensis	767769
tr|A0A1L9UCZ2|A0A1L9UCZ2_9EURO	A0A1L9UCZ2	HC	True	163		NA	1	0	p20[3:162]	662	No	No	Aspergillus brasiliensis CBS 101740	Ascomycota	Eukaryota	Fungi	Ascomycota	Eurotiomycetes	Eurotiales	Aspergillaceae	Aspergillus	Aspergillus brasiliensis	767769
tr|A0A164N3I1|A0A164N3I1_9HOMO	A0A164N3I1	HC	True	159		NA	1	0	p20[71:229]	340	No	No	Sistotremastrum niveocremeum HHB9708	Basidiomycota	Eukaryota	Fungi	Basidiomycota	Agaricomycetes	Trechisporales	Hydnodontaceae	Sistotremastrum	Sistotremastrum niveocremeum	1314777
tr|A0A1Y2XCL6|A0A1Y2XCL6_9PEZI	A0A1Y2XCL6	HC	True	151		NA	1	0	p20[12:162]	646	No	No	Daldinia sp. EC12	Ascomycota	Eukaryota	Fungi	Ascomycota	Sordariomycetes	Xylariales	Hypoxylaceae	Daldinia	Daldinia sp. EC12	1001832
tr|A0A1Y2WYS6|A0A1Y2WYS6_9PEZI	A0A1Y2WYS6	HC	True	181		NA	1	0	p20[5:185]	667	No	No	Daldinia sp. EC12	Ascomycota	Eukaryota	Fungi	Ascomycota	Sordariomycetes	Xylariales	Hypoxylaceae	Daldinia	Daldinia sp. EC12	1001832
tr|A0A164XYU1|A0A164XYU1_9HOMO	A0A164XYU1	HC	True	190		NA	2	0	p20[16:99]-p20[483:672]	945	No	No	Sistotremastrum niveocremeum HHB9708	Basidiomycota	Eukaryota	Fungi	Basidiomycota	Agaricomycetes	Trechisporales	Hydnodontaceae	Sistotremastrum	Sistotremastrum niveocremeum	1314777
tr|A0A164XUQ0|A0A164XUQ0_9HOMO	A0A164XUQ0	HC	True	192		NA	1	0	p20[520:711]	875	No	No	Sistotremastrum niveocremeum HHB9708	Basidiomycota	Eukaryota	Fungi	Basidiomycota	Agaricomycetes	Trechisporales	Hydnodontaceae	Sistotremastrum	Sistotremastrum niveocremeum	1314777
tr|A0A164XZM1|A0A164XZM1_9HOMO	A0A164XZM1	HC	True	186		NA	1	0	p20[53:233]	270	No	No	Sistotremastrum niveocremeum HHB9708	Basidiomycota	Eukaryota	Fungi	Basidiomycota	Agaricomycetes	Trechisporales	Hydnodontaceae	Sistotremastrum	Sistotremastrum niveocremeum	1314777
tr|A0A164XUN4|A0A164XUN4_9HOMO	A0A164XUN4	HC	True	138		NA	2	0	p20[72:214]-p20[466:607]	771	No	No	Sistotremastrum niveocremeum HHB9708	Basidiomycota	Eukaryota	Fungi	Basidiomycota	Agaricomycetes	Trechisporales	Hydnodontaceae	Sistotremastrum	Sistotremastrum niveocremeum	1314777
tr|A0A164XUL9|A0A164XUL9_9HOMO	A0A164XUL9	HC	True	178		NA	1	0	p20[24:196]	410	No	No	Sistotremastrum niveocremeum HHB9708	Basidiomycota	Eukaryota	Fungi	Basidiomycota	Agaricomycetes	Trechisporales	Hydnodontaceae	Sistotremastrum	Sistotremastrum niveocremeum	1314777
tr|A0A164YFE3|A0A164YFE3_9HOMO	A0A164YFE3	LC	Pseudo	168		NA	1	0	p20[115:278]	783	No	No	Sistotremastrum niveocremeum HHB9708	Basidiomycota	Eukaryota	Fungi	Basidiomycota	Agaricomycetes	Trechisporales	Hydnodontaceae	Sistotremastrum	Sistotremastrum niveocremeum	1314777
tr|A0A164N3G8|A0A164N3G8_9HOMO	A0A164N3G8	HC	True	152		NA	1	0	p20[12:163]	272	No	No	Sistotremastrum niveocremeum HHB9708	Basidiomycota	Eukaryota	Fungi	Basidiomycota	Agaricomycetes	Trechisporales	Hydnodontaceae	Sistotremastrum	Sistotremastrum niveocremeum	1314777
tr|A0A164N3F0|A0A164N3F0_9HOMO	A0A164N3F0	HC	True	169		NA	1	0	p20[86:253]	350	No	No	Sistotremastrum niveocremeum HHB9708	Basidiomycota	Eukaryota	Fungi	Basidiomycota	Agaricomycetes	Trechisporales	Hydnodontaceae	Sistotremastrum	Sistotremastrum niveocremeum	1314777
tr|A0A164N3B4|A0A164N3B4_9HOMO	A0A164N3B4	HC	True	159		NA	1	0	p20[212:369]	561	No	No	Sistotremastrum niveocremeum HHB9708	Basidiomycota	Eukaryota	Fungi	Basidiomycota	Agaricomycetes	Trechisporales	Hydnodontaceae	Sistotremastrum	Sistotremastrum niveocremeum	1314777
tr|A0A164XZL5|A0A164XZL5_9HOMO	A0A164XZL5	HC	True	184		NA	1	0	p20[54:237]	242	No	No	Sistotremastrum niveocremeum HHB9708	Basidiomycota	Eukaryota	Fungi	Basidiomycota	Agaricomycetes	Trechisporales	Hydnodontaceae	Sistotremastrum	Sistotremastrum niveocremeum	1314777
tr|A0A0D7BPQ7|A0A0D7BPQ7_9AGAR	A0A0D7BPQ7	HC	True	164		NA	1	0	p20[68:231]	722	No	No	Cylindrobasidium torrendii FP15055 ss-10	Basidiomycota	Eukaryota	Fungi	Basidiomycota	Agaricomycetes	Agaricales	Physalacriaceae	Cylindrobasidium	Cylindrobasidium torrendii	1314674
tr|A0A0D7BRF1|A0A0D7BRF1_9AGAR	A0A0D7BRF1	HC	True	155		NA	1	0	p20[68:221]	757	No	No	Cylindrobasidium torrendii FP15055 ss-10	Basidiomycota	Eukaryota	Fungi	Basidiomycota	Agaricomycetes	Agaricales	Physalacriaceae	Cylindrobasidium	Cylindrobasidium torrendii	1314674
tr|A0A0D7B421|A0A0D7B421_9AGAR	A0A0D7B421	HC	True	159		NA	1	0	p20[205:363]	455	No	No	Cylindrobasidium torrendii FP15055 ss-10	Basidiomycota	Eukaryota	Fungi	Basidiomycota	Agaricomycetes	Agaricales	Physalacriaceae	Cylindrobasidium	Cylindrobasidium torrendii	1314674
tr|A0A1X6NC85|A0A1X6NC85_9APHY	A0A1X6NC85	HC	True	148		NA	1	0	p20[7:154]	652	No	No	Postia placenta MAD-698-R-SB12	Basidiomycota	Eukaryota	Fungi	Basidiomycota	Agaricomycetes	Polyporales	Dacryobolaceae	Postia	Postia placenta	670580
tr|A0A0D7BPT6|A0A0D7BPT6_9AGAR	A0A0D7BPT6	HC	True	154		NA	1	0	p20[68:221]	725	No	No	Cylindrobasidium torrendii FP15055 ss-10	Basidiomycota	Eukaryota	Fungi	Basidiomycota	Agaricomycetes	Agaricales	Physalacriaceae	Cylindrobasidium	Cylindrobasidium torrendii	1314674
tr|A0A1X6MXI4|A0A1X6MXI4_9APHY	A0A1X6MXI4	HC	True	187		NA	1	0	p20[10:196]	317	No	No	Postia placenta MAD-698-R-SB12	Basidiomycota	Eukaryota	Fungi	Basidiomycota	Agaricomycetes	Polyporales	Dacryobolaceae	Postia	Postia placenta	670580
tr|A0A1X6MUA8|A0A1X6MUA8_9APHY	A0A1X6MUA8	HC	True	181		NA	1	0	p20[21:194]	458	No	No	Postia placenta MAD-698-R-SB12	Basidiomycota	Eukaryota	Fungi	Basidiomycota	Agaricomycetes	Polyporales	Dacryobolaceae	Postia	Postia placenta	670580
tr|A0A1X6MXI9|A0A1X6MXI9_9APHY	A0A1X6MXI9	HC	True	181		NA	1	0	p20[22:202]	322	No	No	Postia placenta MAD-698-R-SB12	Basidiomycota	Eukaryota	Fungi	Basidiomycota	Agaricomycetes	Polyporales	Dacryobolaceae	Postia	Postia placenta	670580
tr|A0A0D7BF22|A0A0D7BF22_9AGAR	A0A0D7BF22	HC	True	199		NA	1	0	p20[130:323]	595	No	No	Cylindrobasidium torrendii FP15055 ss-10	Basidiomycota	Eukaryota	Fungi	Basidiomycota	Agaricomycetes	Agaricales	Physalacriaceae	Cylindrobasidium	Cylindrobasidium torrendii	1314674
tr|A0A0D7BIP0|A0A0D7BIP0_9AGAR	A0A0D7BIP0	HC	True	153		NA	1	0	p20[8:148]	661	No	No	Cylindrobasidium torrendii FP15055 ss-10	Basidiomycota	Eukaryota	Fungi	Basidiomycota	Agaricomycetes	Agaricales	Physalacriaceae	Cylindrobasidium	Cylindrobasidium torrendii	1314674
tr|A0A0D7BRM9|A0A0D7BRM9_9AGAR	A0A0D7BRM9	HC	True	178		NA	1	0	p20[18:195]	328	No	No	Cylindrobasidium torrendii FP15055 ss-10	Basidiomycota	Eukaryota	Fungi	Basidiomycota	Agaricomycetes	Agaricales	Physalacriaceae	Cylindrobasidium	Cylindrobasidium torrendii	1314674
tr|A0A0D7BP31|A0A0D7BP31_9AGAR	A0A0D7BP31	YC	Pseudo	147		NA	1	0	p20[43:188]	660	No	No	Cylindrobasidium torrendii FP15055 ss-10	Basidiomycota	Eukaryota	Fungi	Basidiomycota	Agaricomycetes	Agaricales	Physalacriaceae	Cylindrobasidium	Cylindrobasidium torrendii	1314674
tr|A0A0D7B5W4|A0A0D7B5W4_9AGAR	A0A0D7B5W4	HC	True	152		NA	1	0	p20[102:253]	771	No	No	Cylindrobasidium torrendii FP15055 ss-10	Basidiomycota	Eukaryota	Fungi	Basidiomycota	Agaricomycetes	Agaricales	Physalacriaceae	Cylindrobasidium	Cylindrobasidium torrendii	1314674
tr|A0A1X6MXX7|A0A1X6MXX7_9APHY	A0A1X6MXX7	KC	Pseudo	186		NA	1	0	p20[10:191]	430	No	No	Postia placenta MAD-698-R-SB12	Basidiomycota	Eukaryota	Fungi	Basidiomycota	Agaricomycetes	Polyporales	Dacryobolaceae	Postia	Postia placenta	670580
tr|X0GTD8|X0GTD8_FUSOX	X0GTD8	HC	True	193		NA	1	0	p20[9:201]	659	No	No	Fusarium oxysporum f. sp. conglutinans race 2 54008	Ascomycota	Eukaryota	Fungi	Ascomycota	Sordariomycetes	Hypocreales	Nectriaceae	Fusarium	Fusarium oxysporum	1089457
tr|X0B6S7|X0B6S7_FUSOX	X0B6S7	HC	True	180		NA	1	0	p20[9:188]	660	No	No	Fusarium oxysporum f. sp. raphani 54005	Ascomycota	Eukaryota	Fungi	Ascomycota	Sordariomycetes	Hypocreales	Nectriaceae	Fusarium	Fusarium oxysporum	1089458
tr|X0D2A3|X0D2A3_FUSOX	X0D2A3	HC	True	158		NA	1	0	p20[136:293]	382	No	No	Fusarium oxysporum f. sp. raphani 54005	Ascomycota	Eukaryota	Fungi	Ascomycota	Sordariomycetes	Hypocreales	Nectriaceae	Fusarium	Fusarium oxysporum	1089458
tr|A0A0L6WJB0|A0A0L6WJB0_9AGAR	A0A0L6WJB0	HC	True	173		NA	1	0	p20[426:598]	726	No	No	Termitomyces sp. J132	Basidiomycota	Eukaryota	Fungi	Basidiomycota	Agaricomycetes	Agaricales	Lyophyllaceae	Termitomyces	Termitomyces sp. J132	1306850
tr|X0CIT2|X0CIT2_FUSOX	X0CIT2	HC	True	158		NA	1	0	p20[10:167]	675	No	No	Fusarium oxysporum f. sp. raphani 54005	Ascomycota	Eukaryota	Fungi	Ascomycota	Sordariomycetes	Hypocreales	Nectriaceae	Fusarium	Fusarium oxysporum	1089458
tr|X0HB60|X0HB60_FUSOX	X0HB60	HC	True	149		NA	1	0	p20[30:173]	667	No	No	Fusarium oxysporum f. sp. conglutinans race 2 54008	Ascomycota	Eukaryota	Fungi	Ascomycota	Sordariomycetes	Hypocreales	Nectriaceae	Fusarium	Fusarium oxysporum	1089457
tr|X0C593|X0C593_FUSOX	X0C593	HC	True	198		NA	1	0	p20[5:202]	702	No	No	Fusarium oxysporum f. sp. raphani 54005	Ascomycota	Eukaryota	Fungi	Ascomycota	Sordariomycetes	Hypocreales	Nectriaceae	Fusarium	Fusarium oxysporum	1089458
tr|X0HRS4|X0HRS4_FUSOX	X0HRS4	HC	True	158		NA	1	0	p20[121:278]	367	No	No	Fusarium oxysporum f. sp. conglutinans race 2 54008	Ascomycota	Eukaryota	Fungi	Ascomycota	Sordariomycetes	Hypocreales	Nectriaceae	Fusarium	Fusarium oxysporum	1089457
tr|X0I579|X0I579_FUSOX	X0I579	HC	True	158		NA	1	0	p20[10:167]	675	No	No	Fusarium oxysporum f. sp. conglutinans race 2 54008	Ascomycota	Eukaryota	Fungi	Ascomycota	Sordariomycetes	Hypocreales	Nectriaceae	Fusarium	Fusarium oxysporum	1089457
tr|X0C3U0|X0C3U0_FUSOX	X0C3U0	HC	True	149		NA	1	0	p20[30:178]	667	No	No	Fusarium oxysporum f. sp. raphani 54005	Ascomycota	Eukaryota	Fungi	Ascomycota	Sordariomycetes	Hypocreales	Nectriaceae	Fusarium	Fusarium oxysporum	1089458
tr|A0A254UFA3|A0A254UFA3_ASPNG	A0A254UFA3	HC	True	167		NA	1	0	p20[4:170]	255	No	No	Aspergillus niger	Ascomycota	Eukaryota	Fungi	Ascomycota	Eurotiomycetes	Eurotiales	Aspergillaceae	Aspergillus	Aspergillus niger	5061
tr|A0A254UFC1|A0A254UFC1_ASPNG	A0A254UFC1	HC	True	144		NA	1	0	p20[8:150]	627	No	No	Aspergillus niger	Ascomycota	Eukaryota	Fungi	Ascomycota	Eurotiomycetes	Eurotiales	Aspergillaceae	Aspergillus	Aspergillus niger	5061
tr|F8NIL0|F8NIL0_SERL9	F8NIL0	HC	True	173		NA	1	0	p20[14:186]	465	No	No	Serpula lacrymans var. lacrymans S7.9	Basidiomycota	Eukaryota	Fungi	Basidiomycota	Agaricomycetes	Boletales	Serpulaceae	Serpula	Serpula lacrymans	578457
tr|A0A178AXR8|A0A178AXR8_9PLEO	A0A178AXR8	HC	True	189		NA	1	0	p20[4:189]	708	No	No	Stagonospora sp. SRC1lsM3a	Ascomycota	Eukaryota	Fungi	Ascomycota	Dothideomycetes	Pleosporales	Massarinaceae	Stagonospora	Stagonospora sp. SRC1lsM3a	765868
tr|E9E4B0|E9E4B0_METAQ	E9E4B0	HC	True	158		NA	1	0	p20[88:245]	363	No	No	Metarhizium acridum CQMa 102	Ascomycota	Eukaryota	Fungi	Ascomycota	Sordariomycetes	Hypocreales	Clavicipitaceae	Metarhizium	Metarhizium acridum	655827
tr|A0A254UFC4|A0A254UFC4_ASPNG	A0A254UFC4	HC	True	143		NA	1	0	p20[16:158]	825	No	No	Aspergillus niger	Ascomycota	Eukaryota	Fungi	Ascomycota	Eurotiomycetes	Eurotiales	Aspergillaceae	Aspergillus	Aspergillus niger	5061
tr|E9E5G3|E9E5G3_METAQ	E9E5G3	HC	True	155		NA	1	0	p20[12:164]	641	No	No	Metarhizium acridum CQMa 102	Ascomycota	Eukaryota	Fungi	Ascomycota	Sordariomycetes	Hypocreales	Clavicipitaceae	Metarhizium	Metarhizium acridum	655827
tr|A0A2L2TJE8|A0A2L2TJE8_9HYPO	A0A2L2TJE8	HC	True	183		NA	1	0	p20[8:189]	643	No	No	Fusarium venenatum	Ascomycota	Eukaryota	Fungi	Ascomycota	Sordariomycetes	Hypocreales	Nectriaceae	Fusarium	Fusarium venenatum	56646
tr|A0A2L2TR65|A0A2L2TR65_9HYPO	A0A2L2TR65	HC	True	168		NA	1	0	p20[11:174]	698	No	No	Fusarium venenatum	Ascomycota	Eukaryota	Fungi	Ascomycota	Sordariomycetes	Hypocreales	Nectriaceae	Fusarium	Fusarium venenatum	56646
tr|X0LC22|X0LC22_FUSOX	X0LC22	HC	True	158		NA	1	0	p20[121:278]	367	No	No	Fusarium oxysporum f. sp. cubense tropical race 4 54006	Ascomycota	Eukaryota	Fungi	Ascomycota	Sordariomycetes	Hypocreales	Nectriaceae	Fusarium	Fusarium oxysporum	1089451
tr|A0A1L7VWN7|A0A1L7VWN7_FUSPR	A0A1L7VWN7	HC	True	166		NA	1	0	p20[2:167]	656	No	No	Fusarium proliferatum ET1	Ascomycota	Eukaryota	Fungi	Ascomycota	Sordariomycetes	Hypocreales	Nectriaceae	Fusarium	Fusarium proliferatum	1227346
tr|A0A1L7VZU5|A0A1L7VZU5_FUSPR	A0A1L7VZU5	HC	True	156		NA	1	0	p20[12:167]	661	No	No	Fusarium proliferatum ET1	Ascomycota	Eukaryota	Fungi	Ascomycota	Sordariomycetes	Hypocreales	Nectriaceae	Fusarium	Fusarium proliferatum	1227346
tr|N4WMY2|N4WMY2_COCH4	N4WMY2	HC	True	156		NA	1	0	p20[4:159]	657	No	No	Bipolaris maydis ATCC 48331	Ascomycota	Eukaryota	Fungi	Ascomycota	Dothideomycetes	Pleosporales	Pleosporaceae	Bipolaris	Bipolaris maydis	665024
tr|X0JE70|X0JE70_FUSOX	X0JE70	HC	True	158		NA	1	0	p20[10:167]	675	No	No	Fusarium oxysporum f. sp. cubense tropical race 4 54006	Ascomycota	Eukaryota	Fungi	Ascomycota	Sordariomycetes	Hypocreales	Nectriaceae	Fusarium	Fusarium oxysporum	1089451
tr|A0A0U5GD38|A0A0U5GD38_9EURO	A0A0U5GD38	HC	True	160		NA	1	0	p20[6:165]	849	No	No	Aspergillus calidoustus	Ascomycota	Eukaryota	Fungi	Ascomycota	Eurotiomycetes	Eurotiales	Aspergillaceae	Aspergillus	Aspergillus calidoustus	454130
tr|A0A0U5GP53|A0A0U5GP53_9EURO	A0A0U5GP53	HC	True	157		NA	1	0	p20[6:155]	670	No	No	Aspergillus calidoustus	Ascomycota	Eukaryota	Fungi	Ascomycota	Eurotiomycetes	Eurotiales	Aspergillaceae	Aspergillus	Aspergillus calidoustus	454130
tr|A0A165D7R4|A0A165D7R4_9BASI	A0A165D7R4	HC	True	191		NA	1	0	p20[17:207]	478	No	No	Calocera cornea HHB12733	Basidiomycota	Eukaryota	Fungi	Basidiomycota	Dacrymycetes	Dacrymycetales	Dacrymycetaceae	Calocera	Calocera cornea	1353952
tr|A0A1W5D6T9|A0A1W5D6T9_9LECA	A0A1W5D6T9	HC	True	129		NA	1	0	p20[92:220]	816	No	No	Umbilicaria pustulata	Ascomycota	Eukaryota	Fungi	Ascomycota	Lecanoromycetes	Umbilicariales	Umbilicariaceae	Umbilicaria	Umbilicaria pustulata	136370
tr|A0A1W5CZ48|A0A1W5CZ48_9LECA	A0A1W5CZ48	HC	True	167		NA	1	0	p20[11:177]	679	No	No	Umbilicaria pustulata	Ascomycota	Eukaryota	Fungi	Ascomycota	Lecanoromycetes	Umbilicariales	Umbilicariaceae	Umbilicaria	Umbilicaria pustulata	136370
tr|A0A135TTJ2|A0A135TTJ2_9PEZI	A0A135TTJ2	HC	True	168		NA	1	0	p20[10:177]	709	No	No	Colletotrichum nymphaeae SA-01	Ascomycota	Eukaryota	Fungi	Ascomycota	Sordariomycetes	Glomerellales	Glomerellaceae	Colletotrichum	Colletotrichum nymphaeae	1460502
tr|A0A135TZ67|A0A135TZ67_9PEZI	A0A135TZ67	HC	True	172		NA	1	0	p20[9:180]	649	No	No	Colletotrichum nymphaeae SA-01	Ascomycota	Eukaryota	Fungi	Ascomycota	Sordariomycetes	Glomerellales	Glomerellaceae	Colletotrichum	Colletotrichum nymphaeae	1460502
tr|A0A1W5CSI3|A0A1W5CSI3_9LECA	A0A1W5CSI3	HC	True	146		NA	1	0	p20[11:156]	771	No	No	Umbilicaria pustulata	Ascomycota	Eukaryota	Fungi	Ascomycota	Lecanoromycetes	Umbilicariales	Umbilicariaceae	Umbilicaria	Umbilicaria pustulata	136370
tr|A0A165IJI3|A0A165IJI3_EXIGL	A0A165IJI3	HC	True	166		NA	1	0	p20[59:223]	702	No	No	Exidia glandulosa HHB12029	Basidiomycota	Eukaryota	Fungi	Basidiomycota	Agaricomycetes	Auriculariales	Exidiaceae	Exidia	Exidia glandulosa	1314781
tr|A0A2V5H5J1|A0A2V5H5J1_9EURO	A0A2V5H5J1	HC	True	138		NA	1	0	p20[22:159]	471	No	No	Aspergillus violaceofuscus CBS 115571	Ascomycota	Eukaryota	Fungi	Ascomycota	Eurotiomycetes	Eurotiales	Aspergillaceae	Aspergillus	Aspergillus violaceofuscus	1450538
tr|A0A165HG22|A0A165HG22_EXIGL	A0A165HG22	HC	True	160		NA	1	0	p20[460:619]	1102	No	No	Exidia glandulosa HHB12029	Basidiomycota	Eukaryota	Fungi	Basidiomycota	Agaricomycetes	Auriculariales	Exidiaceae	Exidia	Exidia glandulosa	1314781
tr|A0A165LPQ0|A0A165LPQ0_EXIGL	A0A165LPQ0	HC	True	163		NA	1	0	p20[4:166]	392	No	No	Exidia glandulosa HHB12029	Basidiomycota	Eukaryota	Fungi	Basidiomycota	Agaricomycetes	Auriculariales	Exidiaceae	Exidia	Exidia glandulosa	1314781
tr|A0A165CQN7|A0A165CQN7_EXIGL	A0A165CQN7	HC	True	160		NA	1	0	p20[316:465]	979	No	No	Exidia glandulosa HHB12029	Basidiomycota	Eukaryota	Fungi	Basidiomycota	Agaricomycetes	Auriculariales	Exidiaceae	Exidia	Exidia glandulosa	1314781
tr|A0A165HZP4|A0A165HZP4_EXIGL	A0A165HZP4	HC	True	151		NA	1	0	p20[83:233]	365	No	No	Exidia glandulosa HHB12029	Basidiomycota	Eukaryota	Fungi	Basidiomycota	Agaricomycetes	Auriculariales	Exidiaceae	Exidia	Exidia glandulosa	1314781
tr|A0A165FWB0|A0A165FWB0_EXIGL	A0A165FWB0	HC	True	142		NA	1	0	p20[131:272]	378	No	No	Exidia glandulosa HHB12029	Basidiomycota	Eukaryota	Fungi	Basidiomycota	Agaricomycetes	Auriculariales	Exidiaceae	Exidia	Exidia glandulosa	1314781
tr|A0A165FWA3|A0A165FWA3_EXIGL	A0A165FWA3	HC	True	146		NA	1	0	p20[111:255]	422	No	No	Exidia glandulosa HHB12029	Basidiomycota	Eukaryota	Fungi	Basidiomycota	Agaricomycetes	Auriculariales	Exidiaceae	Exidia	Exidia glandulosa	1314781
tr|A0A165CQP5|A0A165CQP5_EXIGL	A0A165CQP5	HC	True	150		NA	1	0	p20[540:689]	1194	No	No	Exidia glandulosa HHB12029	Basidiomycota	Eukaryota	Fungi	Basidiomycota	Agaricomycetes	Auriculariales	Exidiaceae	Exidia	Exidia glandulosa	1314781
tr|A0A165DP25|A0A165DP25_EXIGL	A0A165DP25	HC	True	157		NA	1	0	p20[29:185]	310	No	No	Exidia glandulosa HHB12029	Basidiomycota	Eukaryota	Fungi	Basidiomycota	Agaricomycetes	Auriculariales	Exidiaceae	Exidia	Exidia glandulosa	1314781
tr|A0A165QUE9|A0A165QUE9_9APHY	A0A165QUE9	HC	True	190		NA	1	0	p20[10:197]	331	No	No	Daedalea quercina L-15889	Basidiomycota	Eukaryota	Fungi	Basidiomycota	Agaricomycetes	Polyporales	Fomitopsidaceae	Daedalea	Daedalea quercina	1314783
tr|A0A165RF18|A0A165RF18_9APHY	A0A165RF18	HC	True	168		NA	1	0	p20[84:251]	772	No	No	Daedalea quercina L-15889	Basidiomycota	Eukaryota	Fungi	Basidiomycota	Agaricomycetes	Polyporales	Fomitopsidaceae	Daedalea	Daedalea quercina	1314783
tr|A0A1B8EBM3|A0A1B8EBM3_9PEZI	A0A1B8EBM3	HC	True	163		NA	1	0	p20[5:159]	722	No	No	Pseudogymnoascus sp. 23342-1-I1	Ascomycota	Eukaryota	Fungi	Ascomycota	Leotiomycetes	NA	Pseudeurotiaceae	Pseudogymnoascus	Pseudogymnoascus sp. 23342-1-I1	1524831
tr|A0A165QUD9|A0A165QUD9_9APHY	A0A165QUD9	HC	True	196		NA	1	0	p20[9:204]	338	No	No	Daedalea quercina L-15889	Basidiomycota	Eukaryota	Fungi	Basidiomycota	Agaricomycetes	Polyporales	Fomitopsidaceae	Daedalea	Daedalea quercina	1314783
tr|A0A165KNC5|A0A165KNC5_9APHY	A0A165KNC5	HC	True	180		NA	1	0	p20[57:236]	443	No	No	Daedalea quercina L-15889	Basidiomycota	Eukaryota	Fungi	Basidiomycota	Agaricomycetes	Polyporales	Fomitopsidaceae	Daedalea	Daedalea quercina	1314783
tr|A0A165NSD6|A0A165NSD6_9APHY	A0A165NSD6	HC	True	144		NA	1	0	p20[27:170]	336	No	No	Daedalea quercina L-15889	Basidiomycota	Eukaryota	Fungi	Basidiomycota	Agaricomycetes	Polyporales	Fomitopsidaceae	Daedalea	Daedalea quercina	1314783
tr|A0A165S7R4|A0A165S7R4_9APHY	A0A165S7R4	HC	True	175		NA	1	0	p20[108:271]	763	No	No	Daedalea quercina L-15889	Basidiomycota	Eukaryota	Fungi	Basidiomycota	Agaricomycetes	Polyporales	Fomitopsidaceae	Daedalea	Daedalea quercina	1314783
tr|A0A165REI3|A0A165REI3_9APHY	A0A165REI3	HC	True	175		NA	1	0	p20[22:196]	742	No	No	Daedalea quercina L-15889	Basidiomycota	Eukaryota	Fungi	Basidiomycota	Agaricomycetes	Polyporales	Fomitopsidaceae	Daedalea	Daedalea quercina	1314783
tr|A0A165Q609|A0A165Q609_9APHY	A0A165Q609	HC	True	162		NA	1	0	p20[42:203]	358	No	No	Daedalea quercina L-15889	Basidiomycota	Eukaryota	Fungi	Basidiomycota	Agaricomycetes	Polyporales	Fomitopsidaceae	Daedalea	Daedalea quercina	1314783
tr|A0A165T2P8|A0A165T2P8_9APHY	A0A165T2P8	HC	True	177		NA	1	0	p20[93:268]	447	No	No	Daedalea quercina L-15889	Basidiomycota	Eukaryota	Fungi	Basidiomycota	Agaricomycetes	Polyporales	Fomitopsidaceae	Daedalea	Daedalea quercina	1314783
tr|A0A165QKC6|A0A165QKC6_9APHY	A0A165QKC6	HC	True	168		NA	1	0	p20[35:202]	755	No	No	Daedalea quercina L-15889	Basidiomycota	Eukaryota	Fungi	Basidiomycota	Agaricomycetes	Polyporales	Fomitopsidaceae	Daedalea	Daedalea quercina	1314783
tr|A0A165REM0|A0A165REM0_9APHY	A0A165REM0	HC	True	154		NA	1	0	p20[82:235]	726	No	No	Daedalea quercina L-15889	Basidiomycota	Eukaryota	Fungi	Basidiomycota	Agaricomycetes	Polyporales	Fomitopsidaceae	Daedalea	Daedalea quercina	1314783
tr|A0A165M4Q8|A0A165M4Q8_9APHY	A0A165M4Q8	HC	True	153		NA	1	0	p20[127:279]	825	No	No	Daedalea quercina L-15889	Basidiomycota	Eukaryota	Fungi	Basidiomycota	Agaricomycetes	Polyporales	Fomitopsidaceae	Daedalea	Daedalea quercina	1314783
tr|A0A165Q7P7|A0A165Q7P7_9APHY	A0A165Q7P7	HC	True	183		NA	1	0	p20[23:199]	434	No	No	Daedalea quercina L-15889	Basidiomycota	Eukaryota	Fungi	Basidiomycota	Agaricomycetes	Polyporales	Fomitopsidaceae	Daedalea	Daedalea quercina	1314783
tr|A0A165REJ3|A0A165REJ3_9APHY	A0A165REJ3	HC	True	168		NA	1	0	p20[7:174]	619	No	No	Daedalea quercina L-15889	Basidiomycota	Eukaryota	Fungi	Basidiomycota	Agaricomycetes	Polyporales	Fomitopsidaceae	Daedalea	Daedalea quercina	1314783
tr|A0A165RES4|A0A165RES4_9APHY	A0A165RES4	HC	True	175		NA	1	0	p20[15:188]	721	No	No	Daedalea quercina L-15889	Basidiomycota	Eukaryota	Fungi	Basidiomycota	Agaricomycetes	Polyporales	Fomitopsidaceae	Daedalea	Daedalea quercina	1314783
tr|A0A165NBS2|A0A165NBS2_9APHY	A0A165NBS2	HC	True	165		NA	1	0	p20[12:176]	694	No	No	Daedalea quercina L-15889	Basidiomycota	Eukaryota	Fungi	Basidiomycota	Agaricomycetes	Polyporales	Fomitopsidaceae	Daedalea	Daedalea quercina	1314783
tr|A0A165Q7R4|A0A165Q7R4_9APHY	A0A165Q7R4	HC	True	187		NA	1	0	p20[10:195]	225	No	No	Daedalea quercina L-15889	Basidiomycota	Eukaryota	Fungi	Basidiomycota	Agaricomycetes	Polyporales	Fomitopsidaceae	Daedalea	Daedalea quercina	1314783
tr|A0A165S815|A0A165S815_9APHY	A0A165S815	HC	True	155		NA	1	0	p20[81:233]	739	No	No	Daedalea quercina L-15889	Basidiomycota	Eukaryota	Fungi	Basidiomycota	Agaricomycetes	Polyporales	Fomitopsidaceae	Daedalea	Daedalea quercina	1314783
tr|A0A165N191|A0A165N191_9APHY	A0A165N191	HC	True	149		NA	1	0	p20[7:154]	651	No	No	Daedalea quercina L-15889	Basidiomycota	Eukaryota	Fungi	Basidiomycota	Agaricomycetes	Polyporales	Fomitopsidaceae	Daedalea	Daedalea quercina	1314783
tr|A0A022WCI4|A0A022WCI4_TRIRU	A0A022WCI4	HC	True	160		NA	1	0	p20[154:313]	392	No	No	Trichophyton rubrum CBS 288.86	Ascomycota	Eukaryota	Fungi	Ascomycota	Eurotiomycetes	Onygenales	Arthrodermataceae	Trichophyton	Trichophyton rubrum	1215330
tr|A0A022WBU8|A0A022WBU8_TRIRU	A0A022WBU8	HC	True	154		NA	1	0	p20[154:306]	315	No	No	Trichophyton rubrum CBS 288.86	Ascomycota	Eukaryota	Fungi	Ascomycota	Eurotiomycetes	Onygenales	Arthrodermataceae	Trichophyton	Trichophyton rubrum	1215330
tr|A0A0D2HDA8|A0A0D2HDA8_9EURO	A0A0D2HDA8	HC	True	168		NA	1	0	p20[4:163]	308	No	No	Fonsecaea multimorphosa CBS 102226	Ascomycota	Eukaryota	Fungi	Ascomycota	Eurotiomycetes	Chaetothyriales	Herpotrichiellaceae	Fonsecaea	Fonsecaea multimorphosa	1442371
tr|A0A010RX29|A0A010RX29_9PEZI	A0A010RX29	HC	True	166		NA	1	0	p20[11:176]	709	No	No	Colletotrichum fioriniae PJ7	Ascomycota	Eukaryota	Fungi	Ascomycota	Sordariomycetes	Glomerellales	Glomerellaceae	Colletotrichum	Colletotrichum fioriniae	1445577
tr|R7SDC2|R7SDC2_CONPW	R7SDC2	RC	Pseudo	152		NA	1	0	p20[3:154]	267	No	No	Coniophora puteana RWD-64-598 SS2	Basidiomycota	Eukaryota	Fungi	Basidiomycota	Agaricomycetes	Boletales	Coniophoraceae	Coniophora	Coniophora puteana	741705
tr|A0A146H6P6|A0A146H6P6_9AGAR	A0A146H6P6	HC	True	160		NA	1	0	p20[9:167]	385	No	No	Mycena chlorophos	Basidiomycota	Eukaryota	Fungi	Basidiomycota	Agaricomycetes	Agaricales	Mycenaceae	Mycena	Mycena chlorophos	658473
tr|A0A161YCU1|A0A161YCU1_9PEZI	A0A161YCU1	HC	True	180		NA	1	0	p20[9:182]	646	No	No	Colletotrichum tofieldiae	Ascomycota	Eukaryota	Fungi	Ascomycota	Sordariomycetes	Glomerellales	Glomerellaceae	Colletotrichum	Colletotrichum tofieldiae	708197
tr|A0A146IGQ9|A0A146IGQ9_9AGAR	A0A146IGQ9	HC	True	165		NA	1	0	p20[610:768]	1221	No	No	Mycena chlorophos	Basidiomycota	Eukaryota	Fungi	Basidiomycota	Agaricomycetes	Agaricales	Mycenaceae	Mycena	Mycena chlorophos	658473
tr|A0A146HHN9|A0A146HHN9_9AGAR	A0A146HHN9	HC	True	150		NA	1	0	p20[9:157]	545	No	No	Mycena chlorophos	Basidiomycota	Eukaryota	Fungi	Basidiomycota	Agaricomycetes	Agaricales	Mycenaceae	Mycena	Mycena chlorophos	658473
tr|A0A146HJV0|A0A146HJV0_9AGAR	A0A146HJV0	YS	Pseudo	141		NA	1	0	p20[9:149]	667	No	No	Mycena chlorophos	Basidiomycota	Eukaryota	Fungi	Basidiomycota	Agaricomycetes	Agaricales	Mycenaceae	Mycena	Mycena chlorophos	658473
tr|A0A166STH2|A0A166STH2_9PEZI	A0A166STH2	HC	True	149		NA	1	0	p20[11:159]	641	No	No	Colletotrichum tofieldiae	Ascomycota	Eukaryota	Fungi	Ascomycota	Sordariomycetes	Glomerellales	Glomerellaceae	Colletotrichum	Colletotrichum tofieldiae	708197
tr|A0A146IPE4|A0A146IPE4_9AGAR	A0A146IPE4	HC	True	159		NA	2	0	p20[51:216]-p20[621:788]	1054	No	No	Mycena chlorophos	Basidiomycota	Eukaryota	Fungi	Basidiomycota	Agaricomycetes	Agaricales	Mycenaceae	Mycena	Mycena chlorophos	658473
tr|A0A146HHN1|A0A146HHN1_9AGAR	A0A146HHN1	YC	Pseudo	139		NA	1	0	p20[9:147]	558	No	No	Mycena chlorophos	Basidiomycota	Eukaryota	Fungi	Basidiomycota	Agaricomycetes	Agaricales	Mycenaceae	Mycena	Mycena chlorophos	658473
tr|A0A146H6V0|A0A146H6V0_9AGAR	A0A146H6V0	HC	True	173		NA	1	0	p20[48:220]	540	No	No	Mycena chlorophos	Basidiomycota	Eukaryota	Fungi	Basidiomycota	Agaricomycetes	Agaricales	Mycenaceae	Mycena	Mycena chlorophos	658473
tr|A0A146IIT5|A0A146IIT5_9AGAR	A0A146IIT5	HC	True	167		NA	1	0	p20[27:185]	508	No	No	Mycena chlorophos	Basidiomycota	Eukaryota	Fungi	Basidiomycota	Agaricomycetes	Agaricales	Mycenaceae	Mycena	Mycena chlorophos	658473
tr|A0A146HHQ6|A0A146HHQ6_9AGAR	A0A146HHQ6	HC	True	156		NA	1	0	p20[15:169]	458	No	No	Mycena chlorophos	Basidiomycota	Eukaryota	Fungi	Basidiomycota	Agaricomycetes	Agaricales	Mycenaceae	Mycena	Mycena chlorophos	658473
tr|A0A146HJR4|A0A146HJR4_9AGAR	A0A146HJR4	HC	True	138		NA	1	0	p20[7:143]	170	No	No	Mycena chlorophos	Basidiomycota	Eukaryota	Fungi	Basidiomycota	Agaricomycetes	Agaricales	Mycenaceae	Mycena	Mycena chlorophos	658473
tr|A0A2G7FF73|A0A2G7FF73_9EURO	A0A2G7FF73	HC	True	156		NA	1	0	p20[11:165]	652	No	No	Aspergillus arachidicola	Ascomycota	Eukaryota	Fungi	Ascomycota	Eurotiomycetes	Eurotiales	Aspergillaceae	Aspergillus	Aspergillus arachidicola	656916
tr|A0A0D1ZMG5|A0A0D1ZMG5_9EURO	A0A0D1ZMG5	HC	True	159		NA	1	0	p20[5:162]	244	No	No	Exophiala mesophila	Ascomycota	Eukaryota	Fungi	Ascomycota	Eurotiomycetes	Chaetothyriales	Herpotrichiellaceae	Exophiala	Exophiala mesophila	212818
tr|A0A2G7FSX1|A0A2G7FSX1_9EURO	A0A2G7FSX1	HC	True	145		NA	1	0	p20[5:149]	814	No	No	Aspergillus arachidicola	Ascomycota	Eukaryota	Fungi	Ascomycota	Eurotiomycetes	Eurotiales	Aspergillaceae	Aspergillus	Aspergillus arachidicola	656916
tr|K9GMY7|K9GMY7_PEND2	K9GMY7	HC	True	168		NA	1	0	p20[61:228]	290	No	No	Penicillium digitatum PHI26	Ascomycota	Eukaryota	Fungi	Ascomycota	Eurotiomycetes	Eurotiales	Aspergillaceae	Penicillium	Penicillium digitatum	1170229
tr|A0A165SAY2|A0A165SAY2_9HOMO	A0A165SAY2	HC	True	174		NA	1	0	p20[10:180]	700	No	No	Neolentinus lepideus HHB14362 ss-1	Basidiomycota	Eukaryota	Fungi	Basidiomycota	Agaricomycetes	Gloeophyllales	Gloeophyllaceae	Neolentinus	Neolentinus lepideus	1314782
tr|A0A0K6G300|A0A0K6G300_9HOMO	A0A0K6G300	HC	True	164		NA	1	0	p20[234:397]	923	No	No	Rhizoctonia solani	Basidiomycota	Eukaryota	Fungi	Basidiomycota	Agaricomycetes	Cantharellales	Ceratobasidiaceae	Rhizoctonia	Rhizoctonia solani	456999
tr|A0A0K6FWV5|A0A0K6FWV5_9HOMO	A0A0K6FWV5	HC	True	185		NA	2	0	p20[125:309]-p20[1409:1555]	1945	No	No	Rhizoctonia solani	Basidiomycota	Eukaryota	Fungi	Basidiomycota	Agaricomycetes	Cantharellales	Ceratobasidiaceae	Rhizoctonia	Rhizoctonia solani	456999
tr|A0A0K6G086|A0A0K6G086_9HOMO	A0A0K6G086	HC	True	161		NA	1	0	p20[20:180]	664	No	No	Rhizoctonia solani	Basidiomycota	Eukaryota	Fungi	Basidiomycota	Agaricomycetes	Cantharellales	Ceratobasidiaceae	Rhizoctonia	Rhizoctonia solani	456999
tr|A0A0K6FUQ6|A0A0K6FUQ6_9HOMO	A0A0K6FUQ6	HC	True	152		NA	1	0	p20[47:198]	1530	No	No	Rhizoctonia solani	Basidiomycota	Eukaryota	Fungi	Basidiomycota	Agaricomycetes	Cantharellales	Ceratobasidiaceae	Rhizoctonia	Rhizoctonia solani	456999
tr|A0A0K6FUQ1|A0A0K6FUQ1_9HOMO	A0A0K6FUQ1	HC	True	187		NA	2	0	p20[42:228]-p20[1323:1468]	1842	No	No	Rhizoctonia solani	Basidiomycota	Eukaryota	Fungi	Basidiomycota	Agaricomycetes	Cantharellales	Ceratobasidiaceae	Rhizoctonia	Rhizoctonia solani	456999
tr|A0A0K6GF54|A0A0K6GF54_9HOMO	A0A0K6GF54	HS	Pseudo	157		NA	1	0	p20[43:199]	890	No	No	Rhizoctonia solani	Basidiomycota	Eukaryota	Fungi	Basidiomycota	Agaricomycetes	Cantharellales	Ceratobasidiaceae	Rhizoctonia	Rhizoctonia solani	456999
tr|A0A0K6G3F1|A0A0K6G3F1_9HOMO	A0A0K6G3F1	HC	True	164		NA	1	0	p20[19:182]	682	No	No	Rhizoctonia solani	Basidiomycota	Eukaryota	Fungi	Basidiomycota	Agaricomycetes	Cantharellales	Ceratobasidiaceae	Rhizoctonia	Rhizoctonia solani	456999
tr|A0A0K6FU69|A0A0K6FU69_9HOMO	A0A0K6FU69	HC	True	173		NA	1	0	p20[55:227]	428	No	No	Rhizoctonia solani	Basidiomycota	Eukaryota	Fungi	Basidiomycota	Agaricomycetes	Cantharellales	Ceratobasidiaceae	Rhizoctonia	Rhizoctonia solani	456999
tr|A0A0K6FRJ2|A0A0K6FRJ2_9HOMO	A0A0K6FRJ2	HC	True	177		NA	1	0	p20[4:180]	446	No	No	Rhizoctonia solani	Basidiomycota	Eukaryota	Fungi	Basidiomycota	Agaricomycetes	Cantharellales	Ceratobasidiaceae	Rhizoctonia	Rhizoctonia solani	456999
tr|A0A0K6FMU7|A0A0K6FMU7_9HOMO	A0A0K6FMU7	HF	Pseudo	200		NA	1	0	p20[27:217]	370	No	No	Rhizoctonia solani	Basidiomycota	Eukaryota	Fungi	Basidiomycota	Agaricomycetes	Cantharellales	Ceratobasidiaceae	Rhizoctonia	Rhizoctonia solani	456999
tr|A0A0C9MD31|A0A0C9MD31_9FUNG	A0A0C9MD31	HC	True	161		NA	1	0	p20[189:349]	898	No	No	Mucor ambiguus	Mucoromycota	Eukaryota	Fungi	Mucoromycota	Mucoromycetes	Mucorales	Mucoraceae	Mucor	Mucor ambiguus	91626
tr|A0A0K6FZX0|A0A0K6FZX0_9HOMO	A0A0K6FZX0	HS	Pseudo	155		NA	1	0	p20[43:196]	878	No	No	Rhizoctonia solani	Basidiomycota	Eukaryota	Fungi	Basidiomycota	Agaricomycetes	Cantharellales	Ceratobasidiaceae	Rhizoctonia	Rhizoctonia solani	456999
tr|A0A165S8A3|A0A165S8A3_9HOMO	A0A165S8A3	HC	True	177		NA	1	0	p20[24:191]	390	No	No	Neolentinus lepideus HHB14362 ss-1	Basidiomycota	Eukaryota	Fungi	Basidiomycota	Agaricomycetes	Gloeophyllales	Gloeophyllaceae	Neolentinus	Neolentinus lepideus	1314782
tr|A0A0K6G081|A0A0K6G081_9HOMO	A0A0K6G081	HC	True	164		NA	1	0	p20[68:225]	832	No	No	Rhizoctonia solani	Basidiomycota	Eukaryota	Fungi	Basidiomycota	Agaricomycetes	Cantharellales	Ceratobasidiaceae	Rhizoctonia	Rhizoctonia solani	456999
tr|A0A0K6G7J3|A0A0K6G7J3_9HOMO	A0A0K6G7J3	HC	True	159		NA	1	0	p20[182:340]	921	No	No	Rhizoctonia solani	Basidiomycota	Eukaryota	Fungi	Basidiomycota	Agaricomycetes	Cantharellales	Ceratobasidiaceae	Rhizoctonia	Rhizoctonia solani	456999
tr|A0A0K6G337|A0A0K6G337_9HOMO	A0A0K6G337	HC	True	197		NA	1	0	p20[21:215]	711	No	No	Rhizoctonia solani	Basidiomycota	Eukaryota	Fungi	Basidiomycota	Agaricomycetes	Cantharellales	Ceratobasidiaceae	Rhizoctonia	Rhizoctonia solani	456999
tr|A0A0K6FU05|A0A0K6FU05_9HOMO	A0A0K6FU05	HC	True	148		NA	1	0	p20[46:193]	318	No	No	Rhizoctonia solani	Basidiomycota	Eukaryota	Fungi	Basidiomycota	Agaricomycetes	Cantharellales	Ceratobasidiaceae	Rhizoctonia	Rhizoctonia solani	456999
tr|A0A0K6G2X1|A0A0K6G2X1_9HOMO	A0A0K6G2X1	HC	True	170		NA	2	0	p20[69:174]-p20[523:688]	869	No	No	Rhizoctonia solani	Basidiomycota	Eukaryota	Fungi	Basidiomycota	Agaricomycetes	Cantharellales	Ceratobasidiaceae	Rhizoctonia	Rhizoctonia solani	456999
tr|A0A0K6GH93|A0A0K6GH93_9HOMO	A0A0K6GH93	HC	True	135		NA	1	0	p20[400:534]	712	No	No	Rhizoctonia solani	Basidiomycota	Eukaryota	Fungi	Basidiomycota	Agaricomycetes	Cantharellales	Ceratobasidiaceae	Rhizoctonia	Rhizoctonia solani	456999
tr|A0A0K6GAX1|A0A0K6GAX1_9HOMO	A0A0K6GAX1	YC	Pseudo	179		NA	1	0	p20[17:193]	696	No	No	Rhizoctonia solani	Basidiomycota	Eukaryota	Fungi	Basidiomycota	Agaricomycetes	Cantharellales	Ceratobasidiaceae	Rhizoctonia	Rhizoctonia solani	456999
tr|A0A0K6FYT3|A0A0K6FYT3_9HOMO	A0A0K6FYT3	HC	True	173		NA	1	0	p20[21:193]	702	No	No	Rhizoctonia solani	Basidiomycota	Eukaryota	Fungi	Basidiomycota	Agaricomycetes	Cantharellales	Ceratobasidiaceae	Rhizoctonia	Rhizoctonia solani	456999
tr|A0A165MKB0|A0A165MKB0_9HOMO	A0A165MKB0	HC	True	161		NA	1	0	p20[27:187]	462	No	No	Neolentinus lepideus HHB14362 ss-1	Basidiomycota	Eukaryota	Fungi	Basidiomycota	Agaricomycetes	Gloeophyllales	Gloeophyllaceae	Neolentinus	Neolentinus lepideus	1314782
tr|A0A0K6GB88|A0A0K6GB88_9HOMO	A0A0K6GB88	HC	True	174		NA	1	0	p20[268:441]	564	No	No	Rhizoctonia solani	Basidiomycota	Eukaryota	Fungi	Basidiomycota	Agaricomycetes	Cantharellales	Ceratobasidiaceae	Rhizoctonia	Rhizoctonia solani	456999
tr|A0A0K6G319|A0A0K6G319_9HOMO	A0A0K6G319	HC	True	159		NA	1	0	p20[13:166]	676	No	No	Rhizoctonia solani	Basidiomycota	Eukaryota	Fungi	Basidiomycota	Agaricomycetes	Cantharellales	Ceratobasidiaceae	Rhizoctonia	Rhizoctonia solani	456999
tr|A0A0K6G0I3|A0A0K6G0I3_9HOMO	A0A0K6G0I3	HC	True	163		NA	1	0	p20[67:225]	743	No	No	Rhizoctonia solani	Basidiomycota	Eukaryota	Fungi	Basidiomycota	Agaricomycetes	Cantharellales	Ceratobasidiaceae	Rhizoctonia	Rhizoctonia solani	456999
tr|A0A0K6G071|A0A0K6G071_9HOMO	A0A0K6G071	HC	True	158		NA	1	0	p20[46:203]	1027	No	No	Rhizoctonia solani	Basidiomycota	Eukaryota	Fungi	Basidiomycota	Agaricomycetes	Cantharellales	Ceratobasidiaceae	Rhizoctonia	Rhizoctonia solani	456999
tr|A0A165V1K1|A0A165V1K1_9HOMO	A0A165V1K1	LC	Pseudo	151		NA	1	0	p20[66:216]	700	No	No	Neolentinus lepideus HHB14362 ss-1	Basidiomycota	Eukaryota	Fungi	Basidiomycota	Agaricomycetes	Gloeophyllales	Gloeophyllaceae	Neolentinus	Neolentinus lepideus	1314782
tr|A0A0K6G7Y7|A0A0K6G7Y7_9HOMO	A0A0K6G7Y7	HC	True	154		NA	1	0	p20[180:326]	592	No	No	Rhizoctonia solani	Basidiomycota	Eukaryota	Fungi	Basidiomycota	Agaricomycetes	Cantharellales	Ceratobasidiaceae	Rhizoctonia	Rhizoctonia solani	456999
tr|A0A0F8VBW5|A0A0F8VBW5_9EURO	A0A0F8VBW5	HC	True	139		NA	1	0	p20[16:142]	666	No	No	Aspergillus ochraceoroseus	Ascomycota	Eukaryota	Fungi	Ascomycota	Eurotiomycetes	Eurotiales	Aspergillaceae	Aspergillus	Aspergillus ochraceoroseus	138278
tr|A0A1W2TRV2|A0A1W2TRV2_ROSNE	A0A1W2TRV2	HV	Pseudo	161		NA	1	0	p20[82:242]	1802	No	No	Rosellinia necatrix	Ascomycota	Eukaryota	Fungi	Ascomycota	Sordariomycetes	Xylariales	Xylariaceae	Rosellinia	Rosellinia necatrix	77044
tr|A0A066XHH4|A0A066XHH4_COLSU	A0A066XHH4	HC	True	149		NA	1	0	p20[11:158]	640	No	No	Colletotrichum sublineola	Ascomycota	Eukaryota	Fungi	Ascomycota	Sordariomycetes	Glomerellales	Glomerellaceae	Colletotrichum	Colletotrichum sublineola	1173701
tr|A0A1S8A601|A0A1S8A601_ROSNE	A0A1S8A601	HC	True	158		NA	1	0	p20[4:160]	297	No	No	Rosellinia necatrix	Ascomycota	Eukaryota	Fungi	Ascomycota	Sordariomycetes	Xylariales	Xylariaceae	Rosellinia	Rosellinia necatrix	77044
tr|A0A0H2SQF1|A0A0H2SQF1_9HOMO	A0A0H2SQF1	HC	True	175		NA	1	0	p20[108:281]	332	No	No	Schizopora paradoxa	Basidiomycota	Eukaryota	Fungi	Basidiomycota	Agaricomycetes	Hymenochaetales	Schizoporaceae	Schizopora	Schizopora paradoxa	27342
tr|A0A0H2RD33|A0A0H2RD33_9HOMO	A0A0H2RD33	HC	True	183		NA	1	0	p20[5:187]	361	No	No	Schizopora paradoxa	Basidiomycota	Eukaryota	Fungi	Basidiomycota	Agaricomycetes	Hymenochaetales	Schizoporaceae	Schizopora	Schizopora paradoxa	27342
tr|A0A0H2S4Z5|A0A0H2S4Z5_9HOMO	A0A0H2S4Z5	HC	True	184		NA	1	0	p20[43:226]	404	No	No	Schizopora paradoxa	Basidiomycota	Eukaryota	Fungi	Basidiomycota	Agaricomycetes	Hymenochaetales	Schizoporaceae	Schizopora	Schizopora paradoxa	27342
tr|A0A0H2S022|A0A0H2S022_9HOMO	A0A0H2S022	HC	True	159		NA	1	0	p20[82:240]	339	No	No	Schizopora paradoxa	Basidiomycota	Eukaryota	Fungi	Basidiomycota	Agaricomycetes	Hymenochaetales	Schizoporaceae	Schizopora	Schizopora paradoxa	27342
tr|W7I6J8|W7I6J8_9PEZI	W7I6J8	HC	True	135		NA	1	0	p20[1:135]	783	No	No	Drechslerella stenobrocha 248	Ascomycota	Eukaryota	Fungi	Ascomycota	Orbiliomycetes	Orbiliales	Orbiliaceae	Drechslerella	Drechslerella stenobrocha	1043628
tr|S8EZG2|S8EZG2_FOMPI	S8EZG2	HC	True	179		NA	1	0	p20[25:202]	762	No	No	Fomitopsis pinicola FP-58527 SS1	Basidiomycota	Eukaryota	Fungi	Basidiomycota	Agaricomycetes	Polyporales	Fomitopsidaceae	Fomitopsis	Fomitopsis pinicola	743788
tr|S8FFP9|S8FFP9_FOMPI	S8FFP9	HS	Pseudo	142		NA	1	0	p20[2:143]	147	No	No	Fomitopsis pinicola FP-58527 SS1	Basidiomycota	Eukaryota	Fungi	Basidiomycota	Agaricomycetes	Polyporales	Fomitopsidaceae	Fomitopsis	Fomitopsis pinicola	743788
tr|S8F9K6|S8F9K6_FOMPI	S8F9K6	HC	True	181		NA	1	0	p20[24:204]	421	No	No	Fomitopsis pinicola FP-58527 SS1	Basidiomycota	Eukaryota	Fungi	Basidiomycota	Agaricomycetes	Polyporales	Fomitopsidaceae	Fomitopsis	Fomitopsis pinicola	743788
tr|A0A0D2BXH6|A0A0D2BXH6_9EURO	A0A0D2BXH6	HC	True	160		NA	1	0	p20[4:163]	318	No	No	Cladophialophora immunda	Ascomycota	Eukaryota	Fungi	Ascomycota	Eurotiomycetes	Chaetothyriales	Herpotrichiellaceae	Cladophialophora	Cladophialophora immunda	569365
tr|S8EH92|S8EH92_FOMPI	S8EH92	HC	True	151		NA	1	0	p20[7:156]	653	No	No	Fomitopsis pinicola FP-58527 SS1	Basidiomycota	Eukaryota	Fungi	Basidiomycota	Agaricomycetes	Polyporales	Fomitopsidaceae	Fomitopsis	Fomitopsis pinicola	743788
tr|S8FFC7|S8FFC7_FOMPI	S8FFC7	HC	True	185		NA	1	0	p20[12:196]	343	No	No	Fomitopsis pinicola FP-58527 SS1	Basidiomycota	Eukaryota	Fungi	Basidiomycota	Agaricomycetes	Polyporales	Fomitopsidaceae	Fomitopsis	Fomitopsis pinicola	743788
tr|S8DNM4|S8DNM4_FOMPI	S8DNM4	HC	True	173		NA	1	0	p20[476:647]	1100	No	No	Fomitopsis pinicola FP-58527 SS1	Basidiomycota	Eukaryota	Fungi	Basidiomycota	Agaricomycetes	Polyporales	Fomitopsidaceae	Fomitopsis	Fomitopsis pinicola	743788
tr|S8DZ70|S8DZ70_FOMPI	S8DZ70	RC	Pseudo	165		NA	1	0	p20[20:179]	329	No	No	Fomitopsis pinicola FP-58527 SS1	Basidiomycota	Eukaryota	Fungi	Basidiomycota	Agaricomycetes	Polyporales	Fomitopsidaceae	Fomitopsis	Fomitopsis pinicola	743788
tr|S8DUS4|S8DUS4_FOMPI	S8DUS4	HC	True	149		NA	1	0	p20[2:150]	153	No	No	Fomitopsis pinicola FP-58527 SS1	Basidiomycota	Eukaryota	Fungi	Basidiomycota	Agaricomycetes	Polyporales	Fomitopsidaceae	Fomitopsis	Fomitopsis pinicola	743788
tr|S8DX87|S8DX87_FOMPI	S8DX87	HS	Pseudo	143		NA	1	0	p20[20:161]	164	No	No	Fomitopsis pinicola FP-58527 SS1	Basidiomycota	Eukaryota	Fungi	Basidiomycota	Agaricomycetes	Polyporales	Fomitopsidaceae	Fomitopsis	Fomitopsis pinicola	743788
tr|S8EBF0|S8EBF0_FOMPI	S8EBF0	HC	True	177		NA	1	0	p20[13:189]	326	No	No	Fomitopsis pinicola FP-58527 SS1	Basidiomycota	Eukaryota	Fungi	Basidiomycota	Agaricomycetes	Polyporales	Fomitopsidaceae	Fomitopsis	Fomitopsis pinicola	743788
tr|S8FWF5|S8FWF5_FOMPI	S8FWF5	HC	True	157		NA	1	0	p20[5:161]	656	No	No	Fomitopsis pinicola FP-58527 SS1	Basidiomycota	Eukaryota	Fungi	Basidiomycota	Agaricomycetes	Polyporales	Fomitopsidaceae	Fomitopsis	Fomitopsis pinicola	743788
tr|S8E2U7|S8E2U7_FOMPI	S8E2U7	HC	True	128		NA	1	0	p20[1:128]	129	No	No	Fomitopsis pinicola FP-58527 SS1	Basidiomycota	Eukaryota	Fungi	Basidiomycota	Agaricomycetes	Polyporales	Fomitopsidaceae	Fomitopsis	Fomitopsis pinicola	743788
tr|S0EM54|S0EM54_GIBF5	S0EM54	HC	True	171		NA	1	0	p20[10:176]	669	No	No	Fusarium fujikuroi IMI 58289	Ascomycota	Eukaryota	Fungi	Ascomycota	Sordariomycetes	Hypocreales	Nectriaceae	Fusarium	Fusarium fujikuroi	1279085
tr|B8NTW6|B8NTW6_ASPFN	B8NTW6	HC	True	153		NA	1	0	p20[4:156]	798	No	No	Aspergillus flavus NRRL3357	Ascomycota	Eukaryota	Fungi	Ascomycota	Eurotiomycetes	Eurotiales	Aspergillaceae	Aspergillus	Aspergillus flavus	332952
tr|S0EHR9|S0EHR9_GIBF5	S0EHR9	HC	True	156		NA	1	0	p20[12:167]	661	No	No	Fusarium fujikuroi IMI 58289	Ascomycota	Eukaryota	Fungi	Ascomycota	Sordariomycetes	Hypocreales	Nectriaceae	Fusarium	Fusarium fujikuroi	1279085
tr|A0A1Y2V7R6|A0A1Y2V7R6_9PEZI	A0A1Y2V7R6	HC	True	158		NA	1	0	p20[11:168]	673	No	No	Hypoxylon sp. CO27-5	Ascomycota	Eukaryota	Fungi	Ascomycota	Sordariomycetes	Xylariales	Hypoxylaceae	Hypoxylon	Hypoxylon sp. CO27-5	1001938
tr|A0A1Y2UJQ7|A0A1Y2UJQ7_9PEZI	A0A1Y2UJQ7	HC	True	193		NA	1	0	p20[57:244]	709	No	No	Hypoxylon sp. CO27-5	Ascomycota	Eukaryota	Fungi	Ascomycota	Sordariomycetes	Xylariales	Hypoxylaceae	Hypoxylon	Hypoxylon sp. CO27-5	1001938
tr|A0A084AEX6|A0A084AEX6_STACB	A0A084AEX6	HC	True	162		NA	1	0	p20[11:172]	356	No	No	Stachybotrys chartarum IBT 7711	Ascomycota	Eukaryota	Fungi	Ascomycota	Sordariomycetes	Hypocreales	Stachybotryaceae	Stachybotrys	Stachybotrys chartarum	1280523
tr|A0A1Y2UQ85|A0A1Y2UQ85_9PEZI	A0A1Y2UQ85	HC	True	165		NA	1	0	p20[13:177]	666	No	No	Hypoxylon sp. CO27-5	Ascomycota	Eukaryota	Fungi	Ascomycota	Sordariomycetes	Xylariales	Hypoxylaceae	Hypoxylon	Hypoxylon sp. CO27-5	1001938
tr|A1DKK0|A1DKK0_NEOFI	A1DKK0	HC	True	172		NA	1	0	p20[4:175]	656	No	No	Aspergillus fischeri NRRL 181	Ascomycota	Eukaryota	Fungi	Ascomycota	Eurotiomycetes	Eurotiales	Aspergillaceae	Aspergillus	Aspergillus fischeri	331117
tr|K3UJ16|K3UJ16_FUSPC	K3UJ16	HC	True	181		NA	1	0	p20[10:190]	649	No	No	Fusarium pseudograminearum CS3096	Ascomycota	Eukaryota	Fungi	Ascomycota	Sordariomycetes	Hypocreales	Nectriaceae	Fusarium	Fusarium pseudograminearum	1028729
tr|K3V5G3|K3V5G3_FUSPC	K3V5G3	HC	True	171		NA	1	0	p20[8:162]	644	No	No	Fusarium pseudograminearum CS3096	Ascomycota	Eukaryota	Fungi	Ascomycota	Sordariomycetes	Hypocreales	Nectriaceae	Fusarium	Fusarium pseudograminearum	1028729
tr|A0A142L092|A0A142L092_CANGB	A0A142L092	HC	True	168		NA	1	0	p20[98:264]	288	No	No	[Candida] glabrata	Ascomycota	Eukaryota	Fungi	Ascomycota	Saccharomycetes	Saccharomycetales	Saccharomycetaceae	Nakaseomyces	[Candida] glabrata	5478
tr|Q5B6E8|Q5B6E8_EMENI	Q5B6E8	HC	True	143		NA	1	0	p20[12:148]	540	No	No	Aspergillus nidulans FGSC A4	Ascomycota	Eukaryota	Fungi	Ascomycota	Eurotiomycetes	Eurotiales	Aspergillaceae	Aspergillus	Aspergillus nidulans	227321
tr|A0A1U8QTT8|A0A1U8QTT8_EMENI	A0A1U8QTT8	HC	True	143		NA	1	0	p20[12:148]	540	No	No	Aspergillus nidulans FGSC A4	Ascomycota	Eukaryota	Fungi	Ascomycota	Eurotiomycetes	Eurotiales	Aspergillaceae	Aspergillus	Aspergillus nidulans	227321
tr|A0A370C5Q8|A0A370C5Q8_ASPNG	A0A370C5Q8	HC	True	152		NA	1	0	p20[1345:1489]	1966	No	No	Aspergillus niger ATCC 13496	Ascomycota	Eukaryota	Fungi	Ascomycota	Eurotiomycetes	Eurotiales	Aspergillaceae	Aspergillus	Aspergillus niger	1353008
tr|D8QLA9|D8QLA9_SCHCM	D8QLA9	HC	True	171		NA	1	0	p20[56:219]	425	No	No	Schizophyllum commune H4-8	Basidiomycota	Eukaryota	Fungi	Basidiomycota	Agaricomycetes	Agaricales	Schizophyllaceae	Schizophyllum	Schizophyllum commune	578458
tr|D8PVH0|D8PVH0_SCHCM	D8PVH0	TC	Pseudo	162		NA	1	0	p20[74:235]	348	No	No	Schizophyllum commune H4-8	Basidiomycota	Eukaryota	Fungi	Basidiomycota	Agaricomycetes	Agaricales	Schizophyllaceae	Schizophyllum	Schizophyllum commune	578458
tr|D8Q5F5|D8Q5F5_SCHCM	D8Q5F5	HC	True	175		NA	1	0	p20[64:233]	454	No	No	Schizophyllum commune H4-8	Basidiomycota	Eukaryota	Fungi	Basidiomycota	Agaricomycetes	Agaricales	Schizophyllaceae	Schizophyllum	Schizophyllum commune	578458
tr|A0A2T6ZEX8|A0A2T6ZEX8_TUBBO	A0A2T6ZEX8	HC	True	168		NA	1	0	p20[46:212]	293	No	No	Tuber borchii	Ascomycota	Eukaryota	Fungi	Ascomycota	Pezizomycetes	Pezizales	Tuberaceae	Tuber	Tuber borchii	42251
tr|D8PVG9|D8PVG9_SCHCM	D8PVG9	HC	True	173		NA	1	0	p20[100:263]	376	No	No	Schizophyllum commune H4-8	Basidiomycota	Eukaryota	Fungi	Basidiomycota	Agaricomycetes	Agaricales	Schizophyllaceae	Schizophyllum	Schizophyllum commune	578458
tr|D8PXR3|D8PXR3_SCHCM	D8PXR3	HC	True	159		NA	1	0	p20[9:167]	256	No	No	Schizophyllum commune H4-8	Basidiomycota	Eukaryota	Fungi	Basidiomycota	Agaricomycetes	Agaricales	Schizophyllaceae	Schizophyllum	Schizophyllum commune	578458
tr|D8Q5H6|D8Q5H6_SCHCM	D8Q5H6	HC	True	147		NA	1	0	p20[68:214]	479	No	No	Schizophyllum commune H4-8	Basidiomycota	Eukaryota	Fungi	Basidiomycota	Agaricomycetes	Agaricales	Schizophyllaceae	Schizophyllum	Schizophyllum commune	578458
tr|D8PT77|D8PT77_SCHCM	D8PT77	HC	True	168		NA	1	0	p20[76:240]	436	No	No	Schizophyllum commune H4-8	Basidiomycota	Eukaryota	Fungi	Basidiomycota	Agaricomycetes	Agaricales	Schizophyllaceae	Schizophyllum	Schizophyllum commune	578458
tr|A0A094GBP2|A0A094GBP2_9PEZI	A0A094GBP2	HC	True	162		NA	1	0	p20[5:159]	795	No	No	Pseudogymnoascus sp. VKM F-4518 (FW-2643)	Ascomycota	Eukaryota	Fungi	Ascomycota	Leotiomycetes	NA	Pseudeurotiaceae	Pseudogymnoascus	Pseudogymnoascus sp. VKM F-4518 (FW-2643)	1420913
tr|A0A0L0TDY2|A0A0L0TDY2_ALLMA	A0A0L0TDY2	HC	True	200		NA	1	0	p20[54:250]	406	No	No	Allomyces macrogynus ATCC 38327	Blastocladiomycota	Eukaryota	Fungi	Blastocladiomycota	Blastocladiomycetes	Blastocladiales	Blastocladiaceae	Allomyces	Allomyces macrogynus	578462
tr|A0A094G2Q2|A0A094G2Q2_9PEZI	A0A094G2Q2	HC	True	144		NA	1	0	p20[99:240]	781	No	No	Pseudogymnoascus sp. VKM F-4518 (FW-2643)	Ascomycota	Eukaryota	Fungi	Ascomycota	Leotiomycetes	NA	Pseudeurotiaceae	Pseudogymnoascus	Pseudogymnoascus sp. VKM F-4518 (FW-2643)	1420913
tr|A0A094G3B4|A0A094G3B4_9PEZI	A0A094G3B4	HC	True	157		NA	1	0	p20[130:286]	405	No	No	Pseudogymnoascus sp. VKM F-4518 (FW-2643)	Ascomycota	Eukaryota	Fungi	Ascomycota	Leotiomycetes	NA	Pseudeurotiaceae	Pseudogymnoascus	Pseudogymnoascus sp. VKM F-4518 (FW-2643)	1420913
tr|A0A0L0TDI2|A0A0L0TDI2_ALLMA	A0A0L0TDI2	HC	True	189		NA	1	0	p20[54:238]	419	No	No	Allomyces macrogynus ATCC 38327	Blastocladiomycota	Eukaryota	Fungi	Blastocladiomycota	Blastocladiomycetes	Blastocladiales	Blastocladiaceae	Allomyces	Allomyces macrogynus	578462
tr|A0A067T6P2|A0A067T6P2_GALM3	A0A067T6P2	HC	True	154		NA	1	0	p20[111:260]	432	No	No	Galerina marginata CBS 339.88	Basidiomycota	Eukaryota	Fungi	Basidiomycota	Agaricomycetes	Agaricales	Strophariaceae	Galerina	Galerina marginata	685588
tr|A0A067SSD6|A0A067SSD6_GALM3	A0A067SSD6	HC	True	146		NA	1	0	p20[22:167]	1056	No	No	Galerina marginata CBS 339.88	Basidiomycota	Eukaryota	Fungi	Basidiomycota	Agaricomycetes	Agaricales	Strophariaceae	Galerina	Galerina marginata	685588
tr|A0A067SFS0|A0A067SFS0_GALM3	A0A067SFS0	HC	True	162		NA	1	0	p20[61:219]	703	No	No	Galerina marginata CBS 339.88	Basidiomycota	Eukaryota	Fungi	Basidiomycota	Agaricomycetes	Agaricales	Strophariaceae	Galerina	Galerina marginata	685588
tr|A0A067S9R6|A0A067S9R6_GALM3	A0A067S9R6	HC	True	150		NA	1	0	p20[1228:1377]	1872	No	No	Galerina marginata CBS 339.88	Basidiomycota	Eukaryota	Fungi	Basidiomycota	Agaricomycetes	Agaricales	Strophariaceae	Galerina	Galerina marginata	685588
tr|A0A067SVB4|A0A067SVB4_GALM3	A0A067SVB4	HC	True	155		NA	1	0	p20[30:182]	660	No	No	Galerina marginata CBS 339.88	Basidiomycota	Eukaryota	Fungi	Basidiomycota	Agaricomycetes	Agaricales	Strophariaceae	Galerina	Galerina marginata	685588
tr|A0A067SWJ2|A0A067SWJ2_GALM3	A0A067SWJ2	HC	True	147		NA	1	0	p20[10:156]	658	No	No	Galerina marginata CBS 339.88	Basidiomycota	Eukaryota	Fungi	Basidiomycota	Agaricomycetes	Agaricales	Strophariaceae	Galerina	Galerina marginata	685588
tr|A0A067T4Z6|A0A067T4Z6_GALM3	A0A067T4Z6	HC	True	180		NA	1	0	p20[23:202]	673	No	No	Galerina marginata CBS 339.88	Basidiomycota	Eukaryota	Fungi	Basidiomycota	Agaricomycetes	Agaricales	Strophariaceae	Galerina	Galerina marginata	685588
tr|A0A067ST04|A0A067ST04_GALM3	A0A067ST04	HC	True	152		NA	1	0	p20[25:176]	715	No	No	Galerina marginata CBS 339.88	Basidiomycota	Eukaryota	Fungi	Basidiomycota	Agaricomycetes	Agaricales	Strophariaceae	Galerina	Galerina marginata	685588
tr|A0A067ST81|A0A067ST81_GALM3	A0A067ST81	HC	True	174		NA	1	0	p20[15:175]	721	No	No	Galerina marginata CBS 339.88	Basidiomycota	Eukaryota	Fungi	Basidiomycota	Agaricomycetes	Agaricales	Strophariaceae	Galerina	Galerina marginata	685588
tr|A0A067T344|A0A067T344_GALM3	A0A067T344	HC	True	135		NA	1	0	p20[217:348]	524	No	No	Galerina marginata CBS 339.88	Basidiomycota	Eukaryota	Fungi	Basidiomycota	Agaricomycetes	Agaricales	Strophariaceae	Galerina	Galerina marginata	685588
tr|A0A067T2D6|A0A067T2D6_GALM3	A0A067T2D6	HC	True	163		NA	1	0	p20[2:154]	698	No	No	Galerina marginata CBS 339.88	Basidiomycota	Eukaryota	Fungi	Basidiomycota	Agaricomycetes	Agaricales	Strophariaceae	Galerina	Galerina marginata	685588
tr|A0A067TEE9|A0A067TEE9_GALM3	A0A067TEE9	HC	True	173		NA	1	0	p20[13:185]	672	No	No	Galerina marginata CBS 339.88	Basidiomycota	Eukaryota	Fungi	Basidiomycota	Agaricomycetes	Agaricales	Strophariaceae	Galerina	Galerina marginata	685588
tr|E4V6F9|E4V6F9_ARTGP	E4V6F9	HC	True	166		NA	1	0	p20[11:176]	660	No	No	Nannizzia gypsea CBS 118893	Ascomycota	Eukaryota	Fungi	Ascomycota	Eurotiomycetes	Onygenales	Arthrodermataceae	Nannizzia	Nannizzia gypsea	535722
tr|A0A067TF14|A0A067TF14_GALM3	A0A067TF14	HC	True	180		NA	1	0	p20[17:184]	665	No	No	Galerina marginata CBS 339.88	Basidiomycota	Eukaryota	Fungi	Basidiomycota	Agaricomycetes	Agaricales	Strophariaceae	Galerina	Galerina marginata	685588
tr|A0A067TW54|A0A067TW54_GALM3	A0A067TW54	HC	True	148		NA	1	0	p20[309:456]	919	No	No	Galerina marginata CBS 339.88	Basidiomycota	Eukaryota	Fungi	Basidiomycota	Agaricomycetes	Agaricales	Strophariaceae	Galerina	Galerina marginata	685588
tr|A0A067T2D3|A0A067T2D3_GALM3	A0A067T2D3	HC	True	151		NA	1	0	p20[40:190]	759	No	No	Galerina marginata CBS 339.88	Basidiomycota	Eukaryota	Fungi	Basidiomycota	Agaricomycetes	Agaricales	Strophariaceae	Galerina	Galerina marginata	685588
tr|A0A067STY0|A0A067STY0_GALM3	A0A067STY0	YC	Pseudo	147		NA	1	0	p20[32:178]	681	No	No	Galerina marginata CBS 339.88	Basidiomycota	Eukaryota	Fungi	Basidiomycota	Agaricomycetes	Agaricales	Strophariaceae	Galerina	Galerina marginata	685588
tr|A0A067T3A6|A0A067T3A6_GALM3	A0A067T3A6	YC	Pseudo	152		NA	1	0	p20[54:205]	761	No	No	Galerina marginata CBS 339.88	Basidiomycota	Eukaryota	Fungi	Basidiomycota	Agaricomycetes	Agaricales	Strophariaceae	Galerina	Galerina marginata	685588
tr|A0A067T5E9|A0A067T5E9_GALM3	A0A067T5E9	HC	True	150		NA	1	0	p20[7:156]	643	No	No	Galerina marginata CBS 339.88	Basidiomycota	Eukaryota	Fungi	Basidiomycota	Agaricomycetes	Agaricales	Strophariaceae	Galerina	Galerina marginata	685588
tr|A0A067ST28|A0A067ST28_GALM3	A0A067ST28	HC	True	156		NA	1	0	p20[53:208]	816	No	No	Galerina marginata CBS 339.88	Basidiomycota	Eukaryota	Fungi	Basidiomycota	Agaricomycetes	Agaricales	Strophariaceae	Galerina	Galerina marginata	685588
tr|A0A067SVK6|A0A067SVK6_GALM3	A0A067SVK6	HC	True	155		NA	1	0	p20[61:215]	710	No	No	Galerina marginata CBS 339.88	Basidiomycota	Eukaryota	Fungi	Basidiomycota	Agaricomycetes	Agaricales	Strophariaceae	Galerina	Galerina marginata	685588
tr|A0A067TLT4|A0A067TLT4_GALM3	A0A067TLT4	HC	True	195		NA	1	0	p20[93:284]	486	No	No	Galerina marginata CBS 339.88	Basidiomycota	Eukaryota	Fungi	Basidiomycota	Agaricomycetes	Agaricales	Strophariaceae	Galerina	Galerina marginata	685588
tr|A0A067SSL3|A0A067SSL3_GALM3	A0A067SSL3	HC	True	149		NA	1	0	p20[2:150]	645	No	No	Galerina marginata CBS 339.88	Basidiomycota	Eukaryota	Fungi	Basidiomycota	Agaricomycetes	Agaricales	Strophariaceae	Galerina	Galerina marginata	685588
tr|A0A067SIN2|A0A067SIN2_GALM3	A0A067SIN2	HC	True	177		NA	1	0	p20[59:235]	705	No	No	Galerina marginata CBS 339.88	Basidiomycota	Eukaryota	Fungi	Basidiomycota	Agaricomycetes	Agaricales	Strophariaceae	Galerina	Galerina marginata	685588
tr|A0A067SKI9|A0A067SKI9_GALM3	A0A067SKI9	HC	True	147		NA	1	0	p20[43:189]	602	No	No	Galerina marginata CBS 339.88	Basidiomycota	Eukaryota	Fungi	Basidiomycota	Agaricomycetes	Agaricales	Strophariaceae	Galerina	Galerina marginata	685588
tr|A0A067TJ28|A0A067TJ28_GALM3	A0A067TJ28	HC	True	190		NA	1	0	p20[39:226]	467	No	No	Galerina marginata CBS 339.88	Basidiomycota	Eukaryota	Fungi	Basidiomycota	Agaricomycetes	Agaricales	Strophariaceae	Galerina	Galerina marginata	685588
tr|A0A067STZ8|A0A067STZ8_GALM3	A0A067STZ8	HC	True	151		NA	1	0	p20[2:152]	263	No	No	Galerina marginata CBS 339.88	Basidiomycota	Eukaryota	Fungi	Basidiomycota	Agaricomycetes	Agaricales	Strophariaceae	Galerina	Galerina marginata	685588
tr|A0A067T2C9|A0A067T2C9_GALM3	A0A067T2C9	HC	True	161		NA	1	0	p20[16:176]	706	No	No	Galerina marginata CBS 339.88	Basidiomycota	Eukaryota	Fungi	Basidiomycota	Agaricomycetes	Agaricales	Strophariaceae	Galerina	Galerina marginata	685588
tr|A0A2I1C1I0|A0A2I1C1I0_9EURO	A0A2I1C1I0	HC	True	171		NA	1	0	p20[4:174]	656	No	No	Aspergillus novofumigatus IBT 16806	Ascomycota	Eukaryota	Fungi	Ascomycota	Eurotiomycetes	Eurotiales	Aspergillaceae	Aspergillus	Aspergillus novofumigatus	1392255
tr|A0A0D2HS92|A0A0D2HS92_XYLBA	A0A0D2HS92	HY	Pseudo	112		NA	1	0	p20[1:112]	122	No	No	Cladophialophora bantiana CBS 173.52	Ascomycota	Eukaryota	Fungi	Ascomycota	Eurotiomycetes	Chaetothyriales	Herpotrichiellaceae	Cladophialophora	Cladophialophora bantiana	1442370
tr|A0A067SU49|A0A067SU49_GALM3	A0A067SU49	YC	Pseudo	152		NA	1	0	p20[11:162]	754	No	No	Galerina marginata CBS 339.88	Basidiomycota	Eukaryota	Fungi	Basidiomycota	Agaricomycetes	Agaricales	Strophariaceae	Galerina	Galerina marginata	685588
tr|A0A0D2IAZ7|A0A0D2IAZ7_XYLBA	A0A0D2IAZ7	HC	True	160		NA	1	0	p20[4:163]	305	No	No	Cladophialophora bantiana CBS 173.52	Ascomycota	Eukaryota	Fungi	Ascomycota	Eurotiomycetes	Chaetothyriales	Herpotrichiellaceae	Cladophialophora	Cladophialophora bantiana	1442370
tr|A0A067T074|A0A067T074_GALM3	A0A067T074	QS	Pseudo	150		NA	1	0	p20[1237:1386]	1442	No	No	Galerina marginata CBS 339.88	Basidiomycota	Eukaryota	Fungi	Basidiomycota	Agaricomycetes	Agaricales	Strophariaceae	Galerina	Galerina marginata	685588
tr|A0A067T5Y2|A0A067T5Y2_GALM3	A0A067T5Y2	HC	True	148		NA	1	0	p20[12:159]	614	No	No	Galerina marginata CBS 339.88	Basidiomycota	Eukaryota	Fungi	Basidiomycota	Agaricomycetes	Agaricales	Strophariaceae	Galerina	Galerina marginata	685588
tr|A0A067TA57|A0A067TA57_GALM3	A0A067TA57	HC	True	150		NA	1	0	p20[10:158]	479	No	No	Galerina marginata CBS 339.88	Basidiomycota	Eukaryota	Fungi	Basidiomycota	Agaricomycetes	Agaricales	Strophariaceae	Galerina	Galerina marginata	685588
tr|A0A067TTZ2|A0A067TTZ2_GALM3	A0A067TTZ2	HC	True	149		NA	1	0	p20[17:165]	653	No	No	Galerina marginata CBS 339.88	Basidiomycota	Eukaryota	Fungi	Basidiomycota	Agaricomycetes	Agaricales	Strophariaceae	Galerina	Galerina marginata	685588
tr|A0A067T395|A0A067T395_GALM3	A0A067T395	HC	True	153		NA	1	0	p20[11:163]	659	No	No	Galerina marginata CBS 339.88	Basidiomycota	Eukaryota	Fungi	Basidiomycota	Agaricomycetes	Agaricales	Strophariaceae	Galerina	Galerina marginata	685588
tr|A0A067T417|A0A067T417_GALM3	A0A067T417	HC	True	153		NA	1	0	p20[64:216]	698	No	No	Galerina marginata CBS 339.88	Basidiomycota	Eukaryota	Fungi	Basidiomycota	Agaricomycetes	Agaricales	Strophariaceae	Galerina	Galerina marginata	685588
tr|A0A067SC81|A0A067SC81_GALM3	A0A067SC81	HC	True	145		NA	1	0	p20[1:145]	146	No	No	Galerina marginata CBS 339.88	Basidiomycota	Eukaryota	Fungi	Basidiomycota	Agaricomycetes	Agaricales	Strophariaceae	Galerina	Galerina marginata	685588
tr|A0A2H3BAZ8|A0A2H3BAZ8_9AGAR	A0A2H3BAZ8	HC	True	150		NA	1	0	p20[135:284]	409	No	No	Armillaria solidipes	Basidiomycota	Eukaryota	Fungi	Basidiomycota	Agaricomycetes	Agaricales	Physalacriaceae	Armillaria	Armillaria solidipes	1076256
tr|A0A2H3B2E0|A0A2H3B2E0_9AGAR	A0A2H3B2E0	HC	True	169		NA	1	0	p20[19:187]	301	No	No	Armillaria solidipes	Basidiomycota	Eukaryota	Fungi	Basidiomycota	Agaricomycetes	Agaricales	Physalacriaceae	Armillaria	Armillaria solidipes	1076256
tr|A0A2H3C5F4|A0A2H3C5F4_9AGAR	A0A2H3C5F4	HC	True	177		NA	1	0	p20[150:325]	440	No	No	Armillaria solidipes	Basidiomycota	Eukaryota	Fungi	Basidiomycota	Agaricomycetes	Agaricales	Physalacriaceae	Armillaria	Armillaria solidipes	1076256
tr|A0A2H3B075|A0A2H3B075_9AGAR	A0A2H3B075	HC	True	180		NA	1	0	p20[135:311]	428	No	No	Armillaria solidipes	Basidiomycota	Eukaryota	Fungi	Basidiomycota	Agaricomycetes	Agaricales	Physalacriaceae	Armillaria	Armillaria solidipes	1076256
tr|A0A2H3B1E6|A0A2H3B1E6_9AGAR	A0A2H3B1E6	HC	True	178		NA	1	0	p20[90:264]	384	No	No	Armillaria solidipes	Basidiomycota	Eukaryota	Fungi	Basidiomycota	Agaricomycetes	Agaricales	Physalacriaceae	Armillaria	Armillaria solidipes	1076256
tr|A0A2H3AKP1|A0A2H3AKP1_9AGAR	A0A2H3AKP1	HC	True	159		NA	1	0	p20[10:162]	657	No	No	Armillaria solidipes	Basidiomycota	Eukaryota	Fungi	Basidiomycota	Agaricomycetes	Agaricales	Physalacriaceae	Armillaria	Armillaria solidipes	1076256
tr|A0A2H3B092|A0A2H3B092_9AGAR	A0A2H3B092	HC	True	153		NA	1	0	p20[10:162]	658	No	No	Armillaria solidipes	Basidiomycota	Eukaryota	Fungi	Basidiomycota	Agaricomycetes	Agaricales	Physalacriaceae	Armillaria	Armillaria solidipes	1076256
tr|A0A2H3BMH3|A0A2H3BMH3_9AGAR	A0A2H3BMH3	HC	True	151		NA	1	0	p20[1:151]	269	No	No	Armillaria solidipes	Basidiomycota	Eukaryota	Fungi	Basidiomycota	Agaricomycetes	Agaricales	Physalacriaceae	Armillaria	Armillaria solidipes	1076256
tr|A0A2H3AKL5|A0A2H3AKL5_9AGAR	A0A2H3AKL5	HC	True	157		NA	1	0	p20[9:160]	650	No	No	Armillaria solidipes	Basidiomycota	Eukaryota	Fungi	Basidiomycota	Agaricomycetes	Agaricales	Physalacriaceae	Armillaria	Armillaria solidipes	1076256
tr|A0A2H3C1A1|A0A2H3C1A1_9AGAR	A0A2H3C1A1	HC	True	193		NA	1	0	p20[110:302]	404	No	No	Armillaria solidipes	Basidiomycota	Eukaryota	Fungi	Basidiomycota	Agaricomycetes	Agaricales	Physalacriaceae	Armillaria	Armillaria solidipes	1076256
tr|A0A2H3AWY6|A0A2H3AWY6_9AGAR	A0A2H3AWY6	HC	True	167		NA	1	0	p20[46:212]	742	No	No	Armillaria solidipes	Basidiomycota	Eukaryota	Fungi	Basidiomycota	Agaricomycetes	Agaricales	Physalacriaceae	Armillaria	Armillaria solidipes	1076256
tr|A0A2H3CS00|A0A2H3CS00_9AGAR	A0A2H3CS00	HC	True	179		NA	1	0	p20[16:188]	348	No	No	Armillaria solidipes	Basidiomycota	Eukaryota	Fungi	Basidiomycota	Agaricomycetes	Agaricales	Physalacriaceae	Armillaria	Armillaria solidipes	1076256
tr|A0A2H3AP31|A0A2H3AP31_9AGAR	A0A2H3AP31	HC	True	158		NA	1	0	p20[9:160]	657	No	No	Armillaria solidipes	Basidiomycota	Eukaryota	Fungi	Basidiomycota	Agaricomycetes	Agaricales	Physalacriaceae	Armillaria	Armillaria solidipes	1076256
tr|A0A2H3B2A9|A0A2H3B2A9_9AGAR	A0A2H3B2A9	HC	True	152		NA	1	0	p20[138:289]	292	No	No	Armillaria solidipes	Basidiomycota	Eukaryota	Fungi	Basidiomycota	Agaricomycetes	Agaricales	Physalacriaceae	Armillaria	Armillaria solidipes	1076256
tr|A0A2H3C7S8|A0A2H3C7S8_9AGAR	A0A2H3C7S8	YY	Pseudo	163		NA	1	0	p20[112:274]	401	No	No	Armillaria solidipes	Basidiomycota	Eukaryota	Fungi	Basidiomycota	Agaricomycetes	Agaricales	Physalacriaceae	Armillaria	Armillaria solidipes	1076256
tr|A0A2H3B3M5|A0A2H3B3M5_9AGAR	A0A2H3B3M5	HC	True	189		NA	1	0	p20[135:323]	428	No	No	Armillaria solidipes	Basidiomycota	Eukaryota	Fungi	Basidiomycota	Agaricomycetes	Agaricales	Physalacriaceae	Armillaria	Armillaria solidipes	1076256
tr|A0A2H3B7Y1|A0A2H3B7Y1_9AGAR	A0A2H3B7Y1	HC	True	169		NA	1	0	p20[81:249]	753	No	No	Armillaria solidipes	Basidiomycota	Eukaryota	Fungi	Basidiomycota	Agaricomycetes	Agaricales	Physalacriaceae	Armillaria	Armillaria solidipes	1076256
tr|A0A2H3B8R7|A0A2H3B8R7_9AGAR	A0A2H3B8R7	HY	Pseudo	153		NA	1	0	p20[10:162]	620	No	No	Armillaria solidipes	Basidiomycota	Eukaryota	Fungi	Basidiomycota	Agaricomycetes	Agaricales	Physalacriaceae	Armillaria	Armillaria solidipes	1076256
tr|A0A2H3BXV5|A0A2H3BXV5_9AGAR	A0A2H3BXV5	HG	Pseudo	153		NA	1	0	p20[40:192]	308	No	No	Armillaria solidipes	Basidiomycota	Eukaryota	Fungi	Basidiomycota	Agaricomycetes	Agaricales	Physalacriaceae	Armillaria	Armillaria solidipes	1076256
tr|A0A2H3ALK3|A0A2H3ALK3_9AGAR	A0A2H3ALK3	HC	True	183		NA	1	0	p20[37:215]	379	No	No	Armillaria solidipes	Basidiomycota	Eukaryota	Fungi	Basidiomycota	Agaricomycetes	Agaricales	Physalacriaceae	Armillaria	Armillaria solidipes	1076256
tr|A0A2H3B2F8|A0A2H3B2F8_9AGAR	A0A2H3B2F8	HC	True	199		NA	1	0	p20[118:316]	414	No	No	Armillaria solidipes	Basidiomycota	Eukaryota	Fungi	Basidiomycota	Agaricomycetes	Agaricales	Physalacriaceae	Armillaria	Armillaria solidipes	1076256
tr|A0A2H3AP67|A0A2H3AP67_9AGAR	A0A2H3AP67	HC	True	174		NA	1	0	p20[153:326]	448	No	No	Armillaria solidipes	Basidiomycota	Eukaryota	Fungi	Basidiomycota	Agaricomycetes	Agaricales	Physalacriaceae	Armillaria	Armillaria solidipes	1076256
tr|A0A2H3C9Y4|A0A2H3C9Y4_9AGAR	A0A2H3C9Y4	YC	Pseudo	171		NA	1	0	p20[62:231]	341	No	No	Armillaria solidipes	Basidiomycota	Eukaryota	Fungi	Basidiomycota	Agaricomycetes	Agaricales	Physalacriaceae	Armillaria	Armillaria solidipes	1076256
tr|A0A2H3B6M4|A0A2H3B6M4_9AGAR	A0A2H3B6M4	YC	Pseudo	162		NA	1	0	p20[66:227]	341	No	No	Armillaria solidipes	Basidiomycota	Eukaryota	Fungi	Basidiomycota	Agaricomycetes	Agaricales	Physalacriaceae	Armillaria	Armillaria solidipes	1076256
tr|A0A2H3BEX4|A0A2H3BEX4_9AGAR	A0A2H3BEX4	HC	True	164		NA	1	0	p20[2:165]	168	No	No	Armillaria solidipes	Basidiomycota	Eukaryota	Fungi	Basidiomycota	Agaricomycetes	Agaricales	Physalacriaceae	Armillaria	Armillaria solidipes	1076256
tr|A0A2H3BSG4|A0A2H3BSG4_9AGAR	A0A2H3BSG4	HC	True	175		NA	1	0	p20[32:201]	353	No	No	Armillaria solidipes	Basidiomycota	Eukaryota	Fungi	Basidiomycota	Agaricomycetes	Agaricales	Physalacriaceae	Armillaria	Armillaria solidipes	1076256
tr|A0A2H3BMF0|A0A2H3BMF0_9AGAR	A0A2H3BMF0	HC	True	173		NA	1	0	p20[91:263]	432	No	No	Armillaria solidipes	Basidiomycota	Eukaryota	Fungi	Basidiomycota	Agaricomycetes	Agaricales	Physalacriaceae	Armillaria	Armillaria solidipes	1076256
tr|A0A2H3B4T9|A0A2H3B4T9_9AGAR	A0A2H3B4T9	AG	Pseudo	158		NA	1	0	p20[34:190]	310	No	No	Armillaria solidipes	Basidiomycota	Eukaryota	Fungi	Basidiomycota	Agaricomycetes	Agaricales	Physalacriaceae	Armillaria	Armillaria solidipes	1076256
tr|A0A2H3AWN4|A0A2H3AWN4_9AGAR	A0A2H3AWN4	HC	True	159		NA	1	0	p20[48:205]	718	No	No	Armillaria solidipes	Basidiomycota	Eukaryota	Fungi	Basidiomycota	Agaricomycetes	Agaricales	Physalacriaceae	Armillaria	Armillaria solidipes	1076256
tr|A0A2H3B9H4|A0A2H3B9H4_9AGAR	A0A2H3B9H4	HC	True	176		NA	1	0	p20[33:207]	730	No	No	Armillaria solidipes	Basidiomycota	Eukaryota	Fungi	Basidiomycota	Agaricomycetes	Agaricales	Physalacriaceae	Armillaria	Armillaria solidipes	1076256
tr|A0A2H3B6I9|A0A2H3B6I9_9AGAR	A0A2H3B6I9	LC	Pseudo	149		NA	1	0	p20[1:149]	151	No	No	Armillaria solidipes	Basidiomycota	Eukaryota	Fungi	Basidiomycota	Agaricomycetes	Agaricales	Physalacriaceae	Armillaria	Armillaria solidipes	1076256
tr|A0A2H3B493|A0A2H3B493_9AGAR	A0A2H3B493	HC	True	162		NA	1	0	p20[13:168]	708	No	No	Armillaria solidipes	Basidiomycota	Eukaryota	Fungi	Basidiomycota	Agaricomycetes	Agaricales	Physalacriaceae	Armillaria	Armillaria solidipes	1076256
tr|A0A2H3APS3|A0A2H3APS3_9AGAR	A0A2H3APS3	HC	True	157		NA	1	0	p20[23:179]	348	No	No	Armillaria solidipes	Basidiomycota	Eukaryota	Fungi	Basidiomycota	Agaricomycetes	Agaricales	Physalacriaceae	Armillaria	Armillaria solidipes	1076256
tr|A0A2H3BR16|A0A2H3BR16_9AGAR	A0A2H3BR16	HC	True	193		NA	1	0	p20[115:307]	423	No	No	Armillaria solidipes	Basidiomycota	Eukaryota	Fungi	Basidiomycota	Agaricomycetes	Agaricales	Physalacriaceae	Armillaria	Armillaria solidipes	1076256
tr|A0A2H3BRH6|A0A2H3BRH6_9AGAR	A0A2H3BRH6	HC	True	152		NA	1	0	p20[9:160]	657	No	No	Armillaria solidipes	Basidiomycota	Eukaryota	Fungi	Basidiomycota	Agaricomycetes	Agaricales	Physalacriaceae	Armillaria	Armillaria solidipes	1076256
tr|A0A2H3BH16|A0A2H3BH16_9AGAR	A0A2H3BH16	HC	True	192		NA	1	0	p20[20:211]	384	No	No	Armillaria solidipes	Basidiomycota	Eukaryota	Fungi	Basidiomycota	Agaricomycetes	Agaricales	Physalacriaceae	Armillaria	Armillaria solidipes	1076256
tr|A0A2H3B5L9|A0A2H3B5L9_9AGAR	A0A2H3B5L9	HC	True	148		NA	1	0	p20[1:148]	153	No	No	Armillaria solidipes	Basidiomycota	Eukaryota	Fungi	Basidiomycota	Agaricomycetes	Agaricales	Physalacriaceae	Armillaria	Armillaria solidipes	1076256
tr|A0A2H3BME0|A0A2H3BME0_9AGAR	A0A2H3BME0	HC	True	159		NA	1	0	p20[4:162]	162	No	No	Armillaria solidipes	Basidiomycota	Eukaryota	Fungi	Basidiomycota	Agaricomycetes	Agaricales	Physalacriaceae	Armillaria	Armillaria solidipes	1076256
tr|A0A2H3BSY7|A0A2H3BSY7_9AGAR	A0A2H3BSY7	HC	True	178		NA	1	0	p20[130:307]	420	No	No	Armillaria solidipes	Basidiomycota	Eukaryota	Fungi	Basidiomycota	Agaricomycetes	Agaricales	Physalacriaceae	Armillaria	Armillaria solidipes	1076256
tr|A0A2H3BDF3|A0A2H3BDF3_9AGAR	A0A2H3BDF3	HC	True	172		NA	1	0	p20[5:176]	178	No	No	Armillaria solidipes	Basidiomycota	Eukaryota	Fungi	Basidiomycota	Agaricomycetes	Agaricales	Physalacriaceae	Armillaria	Armillaria solidipes	1076256
tr|A0A2H3B2J2|A0A2H3B2J2_9AGAR	A0A2H3B2J2	HC	True	155		NA	1	0	p20[1:155]	162	No	No	Armillaria solidipes	Basidiomycota	Eukaryota	Fungi	Basidiomycota	Agaricomycetes	Agaricales	Physalacriaceae	Armillaria	Armillaria solidipes	1076256
tr|A0A2H3B228|A0A2H3B228_9AGAR	A0A2H3B228	HC	True	155		NA	1	0	p20[4:158]	158	No	No	Armillaria solidipes	Basidiomycota	Eukaryota	Fungi	Basidiomycota	Agaricomycetes	Agaricales	Physalacriaceae	Armillaria	Armillaria solidipes	1076256
tr|A0A2H3B4U6|A0A2H3B4U6_9AGAR	A0A2H3B4U6	HC	True	167		NA	1	0	p20[1:167]	170	No	No	Armillaria solidipes	Basidiomycota	Eukaryota	Fungi	Basidiomycota	Agaricomycetes	Agaricales	Physalacriaceae	Armillaria	Armillaria solidipes	1076256
tr|A0A2H3AWQ3|A0A2H3AWQ3_9AGAR	A0A2H3AWQ3	HC	True	171		NA	1	0	p20[3:173]	176	No	No	Armillaria solidipes	Basidiomycota	Eukaryota	Fungi	Basidiomycota	Agaricomycetes	Agaricales	Physalacriaceae	Armillaria	Armillaria solidipes	1076256
tr|A0A2H3B1K6|A0A2H3B1K6_9AGAR	A0A2H3B1K6	HC	True	155		NA	1	0	p20[1:155]	155	No	No	Armillaria solidipes	Basidiomycota	Eukaryota	Fungi	Basidiomycota	Agaricomycetes	Agaricales	Physalacriaceae	Armillaria	Armillaria solidipes	1076256
tr|A0A2H3CL82|A0A2H3CL82_9AGAR	A0A2H3CL82	HC	True	169		NA	1	0	p20[421:589]	1183	No	No	Armillaria solidipes	Basidiomycota	Eukaryota	Fungi	Basidiomycota	Agaricomycetes	Agaricales	Physalacriaceae	Armillaria	Armillaria solidipes	1076256
tr|A0A2H3BZF6|A0A2H3BZF6_9AGAR	A0A2H3BZF6	HC	True	157		NA	1	0	p20[23:179]	279	No	No	Armillaria solidipes	Basidiomycota	Eukaryota	Fungi	Basidiomycota	Agaricomycetes	Agaricales	Physalacriaceae	Armillaria	Armillaria solidipes	1076256
tr|A0A2H3CI82|A0A2H3CI82_9AGAR	A0A2H3CI82	HC	True	168		NA	1	0	p20[44:211]	375	No	No	Armillaria solidipes	Basidiomycota	Eukaryota	Fungi	Basidiomycota	Agaricomycetes	Agaricales	Physalacriaceae	Armillaria	Armillaria solidipes	1076256
tr|A0A2H3B5G2|A0A2H3B5G2_9AGAR	A0A2H3B5G2	HC	True	182		NA	1	0	p20[174:355]	458	No	No	Armillaria solidipes	Basidiomycota	Eukaryota	Fungi	Basidiomycota	Agaricomycetes	Agaricales	Physalacriaceae	Armillaria	Armillaria solidipes	1076256
tr|A0A2H3C3Y1|A0A2H3C3Y1_9AGAR	A0A2H3C3Y1	NG	Pseudo	166		NA	1	0	p20[35:198]	333	No	No	Armillaria solidipes	Basidiomycota	Eukaryota	Fungi	Basidiomycota	Agaricomycetes	Agaricales	Physalacriaceae	Armillaria	Armillaria solidipes	1076256
tr|A0A2H3BR40|A0A2H3BR40_9AGAR	A0A2H3BR40	HC	True	177		NA	1	0	p20[135:311]	426	No	No	Armillaria solidipes	Basidiomycota	Eukaryota	Fungi	Basidiomycota	Agaricomycetes	Agaricales	Physalacriaceae	Armillaria	Armillaria solidipes	1076256
tr|A0A2H3C5H4|A0A2H3C5H4_9AGAR	A0A2H3C5H4	HC	True	164		NA	1	0	p20[1:164]	169	No	No	Armillaria solidipes	Basidiomycota	Eukaryota	Fungi	Basidiomycota	Agaricomycetes	Agaricales	Physalacriaceae	Armillaria	Armillaria solidipes	1076256
tr|A0A2H3B054|A0A2H3B054_9AGAR	A0A2H3B054	HC	True	175		NA	1	0	p20[2:176]	178	No	No	Armillaria solidipes	Basidiomycota	Eukaryota	Fungi	Basidiomycota	Agaricomycetes	Agaricales	Physalacriaceae	Armillaria	Armillaria solidipes	1076256
tr|A0A2H3BYI7|A0A2H3BYI7_9AGAR	A0A2H3BYI7	HC	True	190		NA	1	0	p20[108:297]	406	No	No	Armillaria solidipes	Basidiomycota	Eukaryota	Fungi	Basidiomycota	Agaricomycetes	Agaricales	Physalacriaceae	Armillaria	Armillaria solidipes	1076256
tr|A0A2H3C3R1|A0A2H3C3R1_9AGAR	A0A2H3C3R1	HS	Pseudo	156		NA	1	0	p20[6:161]	445	No	No	Armillaria solidipes	Basidiomycota	Eukaryota	Fungi	Basidiomycota	Agaricomycetes	Agaricales	Physalacriaceae	Armillaria	Armillaria solidipes	1076256
tr|A0A2H3B8D4|A0A2H3B8D4_9AGAR	A0A2H3B8D4	HC	True	154		NA	1	0	p20[1:154]	158	No	No	Armillaria solidipes	Basidiomycota	Eukaryota	Fungi	Basidiomycota	Agaricomycetes	Agaricales	Physalacriaceae	Armillaria	Armillaria solidipes	1076256
tr|A0A2H3BEG6|A0A2H3BEG6_9AGAR	A0A2H3BEG6	HC	True	172		NA	1	0	p20[186:357]	507	No	No	Armillaria solidipes	Basidiomycota	Eukaryota	Fungi	Basidiomycota	Agaricomycetes	Agaricales	Physalacriaceae	Armillaria	Armillaria solidipes	1076256
tr|A0A2H3C634|A0A2H3C634_9AGAR	A0A2H3C634	HC	True	162		NA	1	0	p20[20:181]	402	No	No	Armillaria solidipes	Basidiomycota	Eukaryota	Fungi	Basidiomycota	Agaricomycetes	Agaricales	Physalacriaceae	Armillaria	Armillaria solidipes	1076256
tr|A0A2H3BXW4|A0A2H3BXW4_9AGAR	A0A2H3BXW4	NG	Pseudo	168		NA	1	0	p20[35:200]	334	No	No	Armillaria solidipes	Basidiomycota	Eukaryota	Fungi	Basidiomycota	Agaricomycetes	Agaricales	Physalacriaceae	Armillaria	Armillaria solidipes	1076256
tr|A0A2H3BY02|A0A2H3BY02_9AGAR	A0A2H3BY02	LG	Pseudo	174		NA	1	0	p20[14:185]	269	No	No	Armillaria solidipes	Basidiomycota	Eukaryota	Fungi	Basidiomycota	Agaricomycetes	Agaricales	Physalacriaceae	Armillaria	Armillaria solidipes	1076256
tr|A0A2H3AX57|A0A2H3AX57_9AGAR	A0A2H3AX57	HC	True	159		NA	1	0	p20[10:162]	661	No	No	Armillaria solidipes	Basidiomycota	Eukaryota	Fungi	Basidiomycota	Agaricomycetes	Agaricales	Physalacriaceae	Armillaria	Armillaria solidipes	1076256
tr|A0A2H3BP11|A0A2H3BP11_9AGAR	A0A2H3BP11	HC	True	170		NA	1	0	p20[83:252]	370	No	No	Armillaria solidipes	Basidiomycota	Eukaryota	Fungi	Basidiomycota	Agaricomycetes	Agaricales	Physalacriaceae	Armillaria	Armillaria solidipes	1076256
tr|A0A2H3BG88|A0A2H3BG88_9AGAR	A0A2H3BG88	HS	Pseudo	167		NA	1	0	p20[69:235]	351	No	No	Armillaria solidipes	Basidiomycota	Eukaryota	Fungi	Basidiomycota	Agaricomycetes	Agaricales	Physalacriaceae	Armillaria	Armillaria solidipes	1076256
tr|A0A2H3BBJ3|A0A2H3BBJ3_9AGAR	A0A2H3BBJ3	HC	True	149		NA	1	0	p20[20:168]	317	No	No	Armillaria solidipes	Basidiomycota	Eukaryota	Fungi	Basidiomycota	Agaricomycetes	Agaricales	Physalacriaceae	Armillaria	Armillaria solidipes	1076256
tr|A0A2H3AWG2|A0A2H3AWG2_9AGAR	A0A2H3AWG2	FC	Pseudo	169		NA	1	0	p20[83:247]	371	No	No	Armillaria solidipes	Basidiomycota	Eukaryota	Fungi	Basidiomycota	Agaricomycetes	Agaricales	Physalacriaceae	Armillaria	Armillaria solidipes	1076256
tr|A0A2H3B2K7|A0A2H3B2K7_9AGAR	A0A2H3B2K7	HC	True	179		NA	1	0	p20[13:190]	311	No	No	Armillaria solidipes	Basidiomycota	Eukaryota	Fungi	Basidiomycota	Agaricomycetes	Agaricales	Physalacriaceae	Armillaria	Armillaria solidipes	1076256
tr|A0A2H3B324|A0A2H3B324_9AGAR	A0A2H3B324	HC	True	166		NA	1	0	p20[163:328]	447	No	No	Armillaria solidipes	Basidiomycota	Eukaryota	Fungi	Basidiomycota	Agaricomycetes	Agaricales	Physalacriaceae	Armillaria	Armillaria solidipes	1076256
tr|A0A2H3BKG5|A0A2H3BKG5_9AGAR	A0A2H3BKG5	HC	True	151		NA	1	0	p20[117:267]	322	No	No	Armillaria solidipes	Basidiomycota	Eukaryota	Fungi	Basidiomycota	Agaricomycetes	Agaricales	Physalacriaceae	Armillaria	Armillaria solidipes	1076256
tr|A0A2H3BSX6|A0A2H3BSX6_9AGAR	A0A2H3BSX6	HC	True	162		NA	1	0	p20[120:281]	404	No	No	Armillaria solidipes	Basidiomycota	Eukaryota	Fungi	Basidiomycota	Agaricomycetes	Agaricales	Physalacriaceae	Armillaria	Armillaria solidipes	1076256
tr|A0A2H3AL08|A0A2H3AL08_9AGAR	A0A2H3AL08	HC	True	166		NA	1	0	p20[141:306]	432	No	No	Armillaria solidipes	Basidiomycota	Eukaryota	Fungi	Basidiomycota	Agaricomycetes	Agaricales	Physalacriaceae	Armillaria	Armillaria solidipes	1076256
tr|A0A2H3BKD6|A0A2H3BKD6_9AGAR	A0A2H3BKD6	FC	Pseudo	143		NA	1	0	p20[246:387]	480	No	No	Armillaria solidipes	Basidiomycota	Eukaryota	Fungi	Basidiomycota	Agaricomycetes	Agaricales	Physalacriaceae	Armillaria	Armillaria solidipes	1076256
tr|A0A2H3B4W3|A0A2H3B4W3_9AGAR	A0A2H3B4W3	HC	True	168		NA	1	0	p20[93:259]	398	No	No	Armillaria solidipes	Basidiomycota	Eukaryota	Fungi	Basidiomycota	Agaricomycetes	Agaricales	Physalacriaceae	Armillaria	Armillaria solidipes	1076256
tr|A0A2H3BKN2|A0A2H3BKN2_9AGAR	A0A2H3BKN2	HC	True	143		NA	1	0	p20[48:190]	379	No	No	Armillaria solidipes	Basidiomycota	Eukaryota	Fungi	Basidiomycota	Agaricomycetes	Agaricales	Physalacriaceae	Armillaria	Armillaria solidipes	1076256
tr|A0A2H3CH09|A0A2H3CH09_9AGAR	A0A2H3CH09	HC	True	165		NA	1	0	p20[47:210]	843	No	No	Armillaria solidipes	Basidiomycota	Eukaryota	Fungi	Basidiomycota	Agaricomycetes	Agaricales	Physalacriaceae	Armillaria	Armillaria solidipes	1076256
tr|A0A2H3BPI4|A0A2H3BPI4_9AGAR	A0A2H3BPI4	HC	True	184		NA	1	0	p20[1:184]	266	No	No	Armillaria solidipes	Basidiomycota	Eukaryota	Fungi	Basidiomycota	Agaricomycetes	Agaricales	Physalacriaceae	Armillaria	Armillaria solidipes	1076256
tr|A0A2H3CLK7|A0A2H3CLK7_9AGAR	A0A2H3CLK7	HC	True	168		NA	1	0	p20[42:208]	713	No	No	Armillaria solidipes	Basidiomycota	Eukaryota	Fungi	Basidiomycota	Agaricomycetes	Agaricales	Physalacriaceae	Armillaria	Armillaria solidipes	1076256
tr|A0A2H3CCI0|A0A2H3CCI0_9AGAR	A0A2H3CCI0	HC	True	168		NA	1	0	p20[206:372]	865	No	No	Armillaria solidipes	Basidiomycota	Eukaryota	Fungi	Basidiomycota	Agaricomycetes	Agaricales	Physalacriaceae	Armillaria	Armillaria solidipes	1076256
tr|A0A2H3BMD5|A0A2H3BMD5_9AGAR	A0A2H3BMD5	HC	True	178		NA	1	0	p20[146:323]	437	No	No	Armillaria solidipes	Basidiomycota	Eukaryota	Fungi	Basidiomycota	Agaricomycetes	Agaricales	Physalacriaceae	Armillaria	Armillaria solidipes	1076256
tr|A0A2H3BKX5|A0A2H3BKX5_9AGAR	A0A2H3BKX5	HC	True	159		NA	1	0	p20[176:334]	1701	No	No	Armillaria solidipes	Basidiomycota	Eukaryota	Fungi	Basidiomycota	Agaricomycetes	Agaricales	Physalacriaceae	Armillaria	Armillaria solidipes	1076256
tr|A0A2H3B7M2|A0A2H3B7M2_9AGAR	A0A2H3B7M2	HC	True	193		NA	1	0	p20[144:336]	440	No	No	Armillaria solidipes	Basidiomycota	Eukaryota	Fungi	Basidiomycota	Agaricomycetes	Agaricales	Physalacriaceae	Armillaria	Armillaria solidipes	1076256
tr|A0A2H3AVJ1|A0A2H3AVJ1_9AGAR	A0A2H3AVJ1	HC	True	148		NA	1	0	p20[90:237]	354	No	No	Armillaria solidipes	Basidiomycota	Eukaryota	Fungi	Basidiomycota	Agaricomycetes	Agaricales	Physalacriaceae	Armillaria	Armillaria solidipes	1076256
tr|A0A2H3B238|A0A2H3B238_9AGAR	A0A2H3B238	HC	True	158		NA	1	0	p20[2:159]	164	No	No	Armillaria solidipes	Basidiomycota	Eukaryota	Fungi	Basidiomycota	Agaricomycetes	Agaricales	Physalacriaceae	Armillaria	Armillaria solidipes	1076256
tr|A0A2H3B087|A0A2H3B087_9AGAR	A0A2H3B087	HC	True	180		NA	1	0	p20[90:266]	383	No	No	Armillaria solidipes	Basidiomycota	Eukaryota	Fungi	Basidiomycota	Agaricomycetes	Agaricales	Physalacriaceae	Armillaria	Armillaria solidipes	1076256
tr|A0A2H3B4U8|A0A2H3B4U8_9AGAR	A0A2H3B4U8	HC	True	195		NA	1	0	p20[195:388]	504	No	No	Armillaria solidipes	Basidiomycota	Eukaryota	Fungi	Basidiomycota	Agaricomycetes	Agaricales	Physalacriaceae	Armillaria	Armillaria solidipes	1076256
tr|A0A2H3BBG6|A0A2H3BBG6_9AGAR	A0A2H3BBG6	HC	True	165		NA	1	0	p20[1:165]	171	No	No	Armillaria solidipes	Basidiomycota	Eukaryota	Fungi	Basidiomycota	Agaricomycetes	Agaricales	Physalacriaceae	Armillaria	Armillaria solidipes	1076256
tr|A0A2H3B268|A0A2H3B268_9AGAR	A0A2H3B268	HC	True	145		NA	1	0	p20[4:148]	266	No	No	Armillaria solidipes	Basidiomycota	Eukaryota	Fungi	Basidiomycota	Agaricomycetes	Agaricales	Physalacriaceae	Armillaria	Armillaria solidipes	1076256
tr|A0A2H3BFT4|A0A2H3BFT4_9AGAR	A0A2H3BFT4	HC	True	164		NA	1	0	p20[14:174]	297	No	No	Armillaria solidipes	Basidiomycota	Eukaryota	Fungi	Basidiomycota	Agaricomycetes	Agaricales	Physalacriaceae	Armillaria	Armillaria solidipes	1076256
tr|A0A2H3BT22|A0A2H3BT22_9AGAR	A0A2H3BT22	HS	Pseudo	161		NA	1	0	p20[127:285]	410	No	No	Armillaria solidipes	Basidiomycota	Eukaryota	Fungi	Basidiomycota	Agaricomycetes	Agaricales	Physalacriaceae	Armillaria	Armillaria solidipes	1076256
tr|A0A2H3BS65|A0A2H3BS65_9AGAR	A0A2H3BS65	HS	Pseudo	181		NA	1	0	p20[93:271]	397	No	No	Armillaria solidipes	Basidiomycota	Eukaryota	Fungi	Basidiomycota	Agaricomycetes	Agaricales	Physalacriaceae	Armillaria	Armillaria solidipes	1076256
tr|A0A2H3CHC8|A0A2H3CHC8_9AGAR	A0A2H3CHC8	HC	True	174		NA	1	0	p20[79:246]	830	No	No	Armillaria solidipes	Basidiomycota	Eukaryota	Fungi	Basidiomycota	Agaricomycetes	Agaricales	Physalacriaceae	Armillaria	Armillaria solidipes	1076256
tr|A0A2H3BMI5|A0A2H3BMI5_9AGAR	A0A2H3BMI5	NG	Pseudo	169		NA	1	0	p20[35:203]	329	No	No	Armillaria solidipes	Basidiomycota	Eukaryota	Fungi	Basidiomycota	Agaricomycetes	Agaricales	Physalacriaceae	Armillaria	Armillaria solidipes	1076256
tr|A0A2H3B7Y4|A0A2H3B7Y4_9AGAR	A0A2H3B7Y4	HC	True	149		NA	1	0	p20[1:149]	267	No	No	Armillaria solidipes	Basidiomycota	Eukaryota	Fungi	Basidiomycota	Agaricomycetes	Agaricales	Physalacriaceae	Armillaria	Armillaria solidipes	1076256
tr|A0A2H3BPQ4|A0A2H3BPQ4_9AGAR	A0A2H3BPQ4	HC	True	120		NA	1	0	p20[92:211]	289	No	No	Armillaria solidipes	Basidiomycota	Eukaryota	Fungi	Basidiomycota	Agaricomycetes	Agaricales	Physalacriaceae	Armillaria	Armillaria solidipes	1076256
tr|A0A2H3BDC0|A0A2H3BDC0_9AGAR	A0A2H3BDC0	HS	Pseudo	148		NA	1	0	p20[15:162]	203	No	No	Armillaria solidipes	Basidiomycota	Eukaryota	Fungi	Basidiomycota	Agaricomycetes	Agaricales	Physalacriaceae	Armillaria	Armillaria solidipes	1076256
tr|A0A2H3AY15|A0A2H3AY15_9AGAR	A0A2H3AY15	HC	True	170		NA	1	0	p20[31:200]	323	No	No	Armillaria solidipes	Basidiomycota	Eukaryota	Fungi	Basidiomycota	Agaricomycetes	Agaricales	Physalacriaceae	Armillaria	Armillaria solidipes	1076256
tr|A0A067M7I3|A0A067M7I3_9HOMO	A0A067M7I3	HC	True	134		NA	1	0	p20[97:230]	369	No	No	Botryobasidium botryosum FD-172 SS1	Basidiomycota	Eukaryota	Fungi	Basidiomycota	Agaricomycetes	Cantharellales	Botryobasidiaceae	Botryobasidium	Botryobasidium botryosum	930990
tr|A0A067N0Z1|A0A067N0Z1_9HOMO	A0A067N0Z1	HC	True	142		NA	1	0	p20[307:448]	594	No	No	Botryobasidium botryosum FD-172 SS1	Basidiomycota	Eukaryota	Fungi	Basidiomycota	Agaricomycetes	Cantharellales	Botryobasidiaceae	Botryobasidium	Botryobasidium botryosum	930990
tr|A0A2K0VWE5|A0A2K0VWE5_GIBNY	A0A2K0VWE5	HC	True	175		NA	1	0	p20[10:180]	669	No	No	Fusarium nygamai	Ascomycota	Eukaryota	Fungi	Ascomycota	Sordariomycetes	Hypocreales	Nectriaceae	Fusarium	Fusarium nygamai	42673
tr|A0A067NCZ1|A0A067NCZ1_9HOMO	A0A067NCZ1	HC	True	133		NA	1	0	p20[114:246]	387	No	No	Botryobasidium botryosum FD-172 SS1	Basidiomycota	Eukaryota	Fungi	Basidiomycota	Agaricomycetes	Cantharellales	Botryobasidiaceae	Botryobasidium	Botryobasidium botryosum	930990
tr|A0A2K0W8G4|A0A2K0W8G4_GIBNY	A0A2K0W8G4	HC	True	162		NA	1	0	p20[10:170]	660	No	No	Fusarium nygamai	Ascomycota	Eukaryota	Fungi	Ascomycota	Sordariomycetes	Hypocreales	Nectriaceae	Fusarium	Fusarium nygamai	42673
tr|A0A0F7ZW91|A0A0F7ZW91_9HYPO	A0A0F7ZW91	HC	True	172		NA	1	0	p20[9:180]	657	No	No	Hirsutella minnesotensis 3608	Ascomycota	Eukaryota	Fungi	Ascomycota	Sordariomycetes	Hypocreales	Ophiocordycipitaceae	Hirsutella	Hirsutella minnesotensis	1043627
tr|A0A067M831|A0A067M831_9HOMO	A0A067M831	HC	True	167		NA	1	0	p20[82:248]	371	No	No	Botryobasidium botryosum FD-172 SS1	Basidiomycota	Eukaryota	Fungi	Basidiomycota	Agaricomycetes	Cantharellales	Botryobasidiaceae	Botryobasidium	Botryobasidium botryosum	930990
tr|A0A067MJI6|A0A067MJI6_9HOMO	A0A067MJI6	HC	True	177		NA	1	0	p20[84:260]	394	No	No	Botryobasidium botryosum FD-172 SS1	Basidiomycota	Eukaryota	Fungi	Basidiomycota	Agaricomycetes	Cantharellales	Botryobasidiaceae	Botryobasidium	Botryobasidium botryosum	930990
tr|A0A067N1D2|A0A067N1D2_9HOMO	A0A067N1D2	HC	True	142		NA	1	0	p20[112:253]	375	No	No	Botryobasidium botryosum FD-172 SS1	Basidiomycota	Eukaryota	Fungi	Basidiomycota	Agaricomycetes	Cantharellales	Botryobasidiaceae	Botryobasidium	Botryobasidium botryosum	930990
tr|A0A0F7ZXJ9|A0A0F7ZXJ9_9HYPO	A0A0F7ZXJ9	HC	True	168		NA	1	0	p20[7:173]	702	No	No	Hirsutella minnesotensis 3608	Ascomycota	Eukaryota	Fungi	Ascomycota	Sordariomycetes	Hypocreales	Ophiocordycipitaceae	Hirsutella	Hirsutella minnesotensis	1043627
tr|A0A067N3X3|A0A067N3X3_9HOMO	A0A067N3X3	HC	True	184		NA	1	0	p20[324:465]	614	No	No	Botryobasidium botryosum FD-172 SS1	Basidiomycota	Eukaryota	Fungi	Basidiomycota	Agaricomycetes	Cantharellales	Botryobasidiaceae	Botryobasidium	Botryobasidium botryosum	930990
tr|A0A0F7ZQL3|A0A0F7ZQL3_9HYPO	A0A0F7ZQL3	HC	True	168		NA	1	0	p20[7:173]	702	No	No	Hirsutella minnesotensis 3608	Ascomycota	Eukaryota	Fungi	Ascomycota	Sordariomycetes	Hypocreales	Ophiocordycipitaceae	Hirsutella	Hirsutella minnesotensis	1043627
tr|A0A194S9G8|A0A194S9G8_RHOGW	A0A194S9G8	HC	True	171		NA	1	0	p20[20:188]	337	No	No	Rhodotorula graminis WP1	Basidiomycota	Eukaryota	Fungi	Basidiomycota	Microbotryomycetes	Sporidiobolales	Sporidiobolaceae	Rhodotorula	Rhodotorula graminis	578459
tr|A0A2K0W0I3|A0A2K0W0I3_GIBNY	A0A2K0W0I3	HC	True	168		NA	1	0	p20[7:174]	702	No	No	Fusarium nygamai	Ascomycota	Eukaryota	Fungi	Ascomycota	Sordariomycetes	Hypocreales	Nectriaceae	Fusarium	Fusarium nygamai	42673
tr|A0A0F7ZIN6|A0A0F7ZIN6_9HYPO	A0A0F7ZIN6	HC	True	145		NA	1	0	p20[38:182]	372	No	No	Hirsutella minnesotensis 3608	Ascomycota	Eukaryota	Fungi	Ascomycota	Sordariomycetes	Hypocreales	Ophiocordycipitaceae	Hirsutella	Hirsutella minnesotensis	1043627
tr|A0A0F7ZX20|A0A0F7ZX20_9HYPO	A0A0F7ZX20	HC	True	168		NA	1	0	p20[7:174]	390	No	No	Hirsutella minnesotensis 3608	Ascomycota	Eukaryota	Fungi	Ascomycota	Sordariomycetes	Hypocreales	Ophiocordycipitaceae	Hirsutella	Hirsutella minnesotensis	1043627
tr|A0A1V8TR06|A0A1V8TR06_9PEZI	A0A1V8TR06	HC	True	153		NA	1	0	p20[1:152]	576	No	No	Rachicladosporium antarcticum	Ascomycota	Eukaryota	Fungi	Ascomycota	Dothideomycetes	Capnodiales	Cladosporiaceae	Rachicladosporium	Rachicladosporium antarcticum	1507870
tr|A0A1Y1ZP70|A0A1Y1ZP70_9PLEO	A0A1Y1ZP70	HC	True	169		NA	1	0	p20[11:167]	639	No	No	Clohesyomyces aquaticus	Ascomycota	Eukaryota	Fungi	Ascomycota	Dothideomycetes	Pleosporales	Lindgomycetaceae	Clohesyomyces	Clohesyomyces aquaticus	1231657
tr|A0A0C3AA72|A0A0C3AA72_9HOMO	A0A0C3AA72	HC	True	153		NA	1	0	p20[33:185]	399	No	No	Scleroderma citrinum Foug A	Basidiomycota	Eukaryota	Fungi	Basidiomycota	Agaricomycetes	Boletales	Sclerodermataceae	Scleroderma	Scleroderma citrinum	1036808
tr|A0A094KSX1|A0A094KSX1_9PEZI	A0A094KSX1	HC	True	163		NA	1	0	p20[5:159]	797	No	No	Pseudogymnoascus sp. VKM F-4520 (FW-2644)	Ascomycota	Eukaryota	Fungi	Ascomycota	Leotiomycetes	NA	Pseudeurotiaceae	Pseudogymnoascus	Pseudogymnoascus sp. VKM F-4520 (FW-2644)	1420915
tr|A0A094IXW7|A0A094IXW7_9PEZI	A0A094IXW7	HC	True	144		NA	1	0	p20[76:219]	643	No	No	Pseudogymnoascus sp. VKM F-4520 (FW-2644)	Ascomycota	Eukaryota	Fungi	Ascomycota	Leotiomycetes	NA	Pseudeurotiaceae	Pseudogymnoascus	Pseudogymnoascus sp. VKM F-4520 (FW-2644)	1420915
tr|W9KTL3|W9KTL3_FUSOX	W9KTL3	HC	True	158		NA	1	0	p20[121:278]	367	No	No	Fusarium oxysporum Fo47	Ascomycota	Eukaryota	Fungi	Ascomycota	Sordariomycetes	Hypocreales	Nectriaceae	Fusarium	Fusarium oxysporum	660027
tr|A0A094IGA6|A0A094IGA6_9PEZI	A0A094IGA6	HC	True	154		NA	1	0	p20[318:470]	479	No	No	Pseudogymnoascus sp. VKM F-4520 (FW-2644)	Ascomycota	Eukaryota	Fungi	Ascomycota	Leotiomycetes	NA	Pseudeurotiaceae	Pseudogymnoascus	Pseudogymnoascus sp. VKM F-4520 (FW-2644)	1420915
tr|A0A093VDZ6|A0A093VDZ6_TALMA	A0A093VDZ6	HC	True	160		NA	1	0	p20[151:310]	325	No	No	Talaromyces marneffei PM1	Ascomycota	Eukaryota	Fungi	Ascomycota	Eurotiomycetes	Eurotiales	Trichocomaceae	Talaromyces	Talaromyces marneffei	1077442
tr|A0A094GLD2|A0A094GLD2_9PEZI	A0A094GLD2	HC	True	150		NA	1	0	p20[14:163]	663	No	No	Pseudogymnoascus sp. VKM F-4520 (FW-2644)	Ascomycota	Eukaryota	Fungi	Ascomycota	Leotiomycetes	NA	Pseudeurotiaceae	Pseudogymnoascus	Pseudogymnoascus sp. VKM F-4520 (FW-2644)	1420915
tr|W9JUB9|W9JUB9_FUSOX	W9JUB9	HC	True	158		NA	1	0	p20[10:167]	675	No	No	Fusarium oxysporum Fo47	Ascomycota	Eukaryota	Fungi	Ascomycota	Sordariomycetes	Hypocreales	Nectriaceae	Fusarium	Fusarium oxysporum	660027
tr|W7MW76|W7MW76_GIBM7	W7MW76	HC	True	155		NA	1	0	p20[10:164]	209	No	No	Fusarium verticillioides 7600	Ascomycota	Eukaryota	Fungi	Ascomycota	Sordariomycetes	Hypocreales	Nectriaceae	Fusarium	Fusarium verticillioides	334819
tr|W7M091|W7M091_GIBM7	W7M091	HC	True	149		NA	1	0	p20[30:178]	667	No	No	Fusarium verticillioides 7600	Ascomycota	Eukaryota	Fungi	Ascomycota	Sordariomycetes	Hypocreales	Nectriaceae	Fusarium	Fusarium verticillioides	334819
tr|A0A1Q5THC1|A0A1Q5THC1_9EURO	A0A1Q5THC1	HC	True	160		NA	1	0	p20[158:317]	387	No	No	Penicillium subrubescens	Ascomycota	Eukaryota	Fungi	Ascomycota	Eurotiomycetes	Eurotiales	Aspergillaceae	Penicillium	Penicillium subrubescens	1316194
tr|A0A1Q5ULB0|A0A1Q5ULB0_9EURO	A0A1Q5ULB0	HC	True	162		NA	1	0	p20[4:164]	266	No	No	Penicillium subrubescens	Ascomycota	Eukaryota	Fungi	Ascomycota	Eurotiomycetes	Eurotiales	Aspergillaceae	Penicillium	Penicillium subrubescens	1316194
tr|A0A370JB22|A0A370JB22_VENIN	A0A370JB22	HC	True	137		NA	1	0	p20[64:186]	498	No	No	Venturia inaequalis	Ascomycota	Eukaryota	Fungi	Ascomycota	Dothideomycetes	Venturiales	Venturiaceae	Venturia	Venturia inaequalis	5025
tr|A0A0C3QP91|A0A0C3QP91_9HOMO	A0A0C3QP91	HC	True	142		NA	1	0	p20[65:202]	323	No	No	Tulasnella calospora MUT 4182	Basidiomycota	Eukaryota	Fungi	Basidiomycota	Agaricomycetes	Cantharellales	Tulasnellaceae	Tulasnella	Tulasnella calospora	1051891
tr|A0A0C3K3X8|A0A0C3K3X8_9HOMO	A0A0C3K3X8	HC	True	132		NA	1	0	p20[73:197]	328	No	No	Tulasnella calospora MUT 4182	Basidiomycota	Eukaryota	Fungi	Basidiomycota	Agaricomycetes	Cantharellales	Tulasnellaceae	Tulasnella	Tulasnella calospora	1051891
tr|A0A0C3M621|A0A0C3M621_9HOMO	A0A0C3M621	HC	True	139		NA	1	0	p20[73:211]	331	No	No	Tulasnella calospora MUT 4182	Basidiomycota	Eukaryota	Fungi	Basidiomycota	Agaricomycetes	Cantharellales	Tulasnellaceae	Tulasnella	Tulasnella calospora	1051891
tr|A0A0C3QEJ4|A0A0C3QEJ4_9HOMO	A0A0C3QEJ4	HC	True	137		NA	1	0	p20[73:197]	328	No	No	Tulasnella calospora MUT 4182	Basidiomycota	Eukaryota	Fungi	Basidiomycota	Agaricomycetes	Cantharellales	Tulasnellaceae	Tulasnella	Tulasnella calospora	1051891
tr|A0A0C3MJW1|A0A0C3MJW1_9HOMO	A0A0C3MJW1	HC	True	170		NA	1	0	p20[41:210]	323	No	No	Tulasnella calospora MUT 4182	Basidiomycota	Eukaryota	Fungi	Basidiomycota	Agaricomycetes	Cantharellales	Tulasnellaceae	Tulasnella	Tulasnella calospora	1051891
tr|A0A139A4P8|A0A139A4P8_GONPR	A0A139A4P8	HC	True	151		NA	1	0	p20[116:266]	306	No	No	Gonapodya prolifera JEL478	Chytridiomycota	Eukaryota	Fungi	Chytridiomycota	Monoblepharidomycetes	Monoblepharidales	Gonapodyaceae	Gonapodya	Gonapodya prolifera	1344416
tr|A0A094BI76|A0A094BI76_9PEZI	A0A094BI76	HC	True	156		NA	1	0	p20[84:226]	635	No	No	Pseudogymnoascus sp. VKM F-4513 (FW-928)	Ascomycota	Eukaryota	Fungi	Ascomycota	Leotiomycetes	NA	Pseudeurotiaceae	Pseudogymnoascus	Pseudogymnoascus sp. VKM F-4513 (FW-928)	1420907
tr|A0A0C3K7P2|A0A0C3K7P2_9HOMO	A0A0C3K7P2	HC	True	152		NA	1	0	p20[6:157]	249	No	No	Tulasnella calospora MUT 4182	Basidiomycota	Eukaryota	Fungi	Basidiomycota	Agaricomycetes	Cantharellales	Tulasnellaceae	Tulasnella	Tulasnella calospora	1051891
tr|A0A0C3L5K8|A0A0C3L5K8_9HOMO	A0A0C3L5K8	HC	True	140		NA	1	0	p20[75:209]	332	No	No	Tulasnella calospora MUT 4182	Basidiomycota	Eukaryota	Fungi	Basidiomycota	Agaricomycetes	Cantharellales	Tulasnellaceae	Tulasnella	Tulasnella calospora	1051891
tr|A0A0C3QMJ6|A0A0C3QMJ6_9HOMO	A0A0C3QMJ6	HC	True	142		NA	1	0	p20[70:211]	328	No	No	Tulasnella calospora MUT 4182	Basidiomycota	Eukaryota	Fungi	Basidiomycota	Agaricomycetes	Cantharellales	Tulasnellaceae	Tulasnella	Tulasnella calospora	1051891
tr|A0A0C2XM44|A0A0C2XM44_HEBCY	A0A0C2XM44	HC	True	170		NA	1	0	p20[18:185]	672	No	No	Hebeloma cylindrosporum h7	Basidiomycota	Eukaryota	Fungi	Basidiomycota	Agaricomycetes	Agaricales	Cortinariaceae	Hebeloma	Hebeloma cylindrosporum	686832
tr|A0A0C2Y8T0|A0A0C2Y8T0_HEBCY	A0A0C2Y8T0	HC	True	176		NA	1	0	p20[33:208]	225	No	No	Hebeloma cylindrosporum h7	Basidiomycota	Eukaryota	Fungi	Basidiomycota	Agaricomycetes	Agaricales	Cortinariaceae	Hebeloma	Hebeloma cylindrosporum	686832
tr|A0A0C3CSF0|A0A0C3CSF0_HEBCY	A0A0C3CSF0	HC	True	150		NA	1	0	p20[13:162]	637	No	No	Hebeloma cylindrosporum h7	Basidiomycota	Eukaryota	Fungi	Basidiomycota	Agaricomycetes	Agaricales	Cortinariaceae	Hebeloma	Hebeloma cylindrosporum	686832
tr|A0A0C2XW57|A0A0C2XW57_HEBCY	A0A0C2XW57	HC	True	156		NA	1	0	p20[41:196]	692	No	No	Hebeloma cylindrosporum h7	Basidiomycota	Eukaryota	Fungi	Basidiomycota	Agaricomycetes	Agaricales	Cortinariaceae	Hebeloma	Hebeloma cylindrosporum	686832
tr|A0A0C2Y622|A0A0C2Y622_HEBCY	A0A0C2Y622	HC	True	156		NA	1	0	p20[7:162]	647	No	No	Hebeloma cylindrosporum h7	Basidiomycota	Eukaryota	Fungi	Basidiomycota	Agaricomycetes	Agaricales	Cortinariaceae	Hebeloma	Hebeloma cylindrosporum	686832
tr|A0A0C3BZ90|A0A0C3BZ90_HEBCY	A0A0C3BZ90	HC	True	150		NA	1	0	p20[58:207]	793	No	No	Hebeloma cylindrosporum h7	Basidiomycota	Eukaryota	Fungi	Basidiomycota	Agaricomycetes	Agaricales	Cortinariaceae	Hebeloma	Hebeloma cylindrosporum	686832
tr|A0A0C3CDX4|A0A0C3CDX4_HEBCY	A0A0C3CDX4	HC	True	155		NA	1	0	p20[45:198]	637	No	No	Hebeloma cylindrosporum h7	Basidiomycota	Eukaryota	Fungi	Basidiomycota	Agaricomycetes	Agaricales	Cortinariaceae	Hebeloma	Hebeloma cylindrosporum	686832
tr|A0A0C3BPJ5|A0A0C3BPJ5_HEBCY	A0A0C3BPJ5	HC	True	147		NA	1	0	p20[3:149]	155	No	No	Hebeloma cylindrosporum h7	Basidiomycota	Eukaryota	Fungi	Basidiomycota	Agaricomycetes	Agaricales	Cortinariaceae	Hebeloma	Hebeloma cylindrosporum	686832
tr|A0A0C3CT12|A0A0C3CT12_HEBCY	A0A0C3CT12	HC	True	141		NA	1	0	p20[257:397]	407	No	No	Hebeloma cylindrosporum h7	Basidiomycota	Eukaryota	Fungi	Basidiomycota	Agaricomycetes	Agaricales	Cortinariaceae	Hebeloma	Hebeloma cylindrosporum	686832
tr|A0A0C2YLU9|A0A0C2YLU9_HEBCY	A0A0C2YLU9	HC	True	144		NA	1	0	p20[28:170]	775	No	No	Hebeloma cylindrosporum h7	Basidiomycota	Eukaryota	Fungi	Basidiomycota	Agaricomycetes	Agaricales	Cortinariaceae	Hebeloma	Hebeloma cylindrosporum	686832
tr|A0A0C2XW47|A0A0C2XW47_HEBCY	A0A0C2XW47	HC	True	162		NA	1	0	p20[37:196]	674	No	No	Hebeloma cylindrosporum h7	Basidiomycota	Eukaryota	Fungi	Basidiomycota	Agaricomycetes	Agaricales	Cortinariaceae	Hebeloma	Hebeloma cylindrosporum	686832
tr|G4T4T7|G4T4T7_SERID	G4T4T7	HC	True	165		NA	1	0	p20[118:193]	384	No	No	Serendipita indica DSM 11827	Basidiomycota	Eukaryota	Fungi	Basidiomycota	Agaricomycetes	Sebacinales	Serendipitaceae	Serendipita	Serendipita indica	1109443
tr|A8NZD6|A8NZD6_COPC7	A8NZD6	HC	True	165		NA	1	0	p20[33:197]	702	No	No	Coprinopsis cinerea okayama7#130	Basidiomycota	Eukaryota	Fungi	Basidiomycota	Agaricomycetes	Agaricales	Psathyrellaceae	Coprinopsis	Coprinopsis cinerea	240176
tr|G9NQF6|G9NQF6_HYPAI	G9NQF6	HC	True	178		NA	1	0	p20[8:185]	664	No	No	Trichoderma atroviride IMI 206040	Ascomycota	Eukaryota	Fungi	Ascomycota	Sordariomycetes	Hypocreales	Hypocreaceae	Trichoderma	Trichoderma atroviride	452589
tr|G4TXP3|G4TXP3_SERID	G4TXP3	HC	True	183		NA	1	0	p20[9:189]	654	No	No	Serendipita indica DSM 11827	Basidiomycota	Eukaryota	Fungi	Basidiomycota	Agaricomycetes	Sebacinales	Serendipitaceae	Serendipita	Serendipita indica	1109443
tr|D6RPR7|D6RPR7_COPC7	D6RPR7	HC	True	176		NA	1	0	p20[68:243]	726	No	No	Coprinopsis cinerea okayama7#130	Basidiomycota	Eukaryota	Fungi	Basidiomycota	Agaricomycetes	Agaricales	Psathyrellaceae	Coprinopsis	Coprinopsis cinerea	240176
tr|A0A0A1TP13|A0A0A1TP13_9HYPO	A0A0A1TP13	HC	True	154		NA	1	0	p20[4:156]	660	No	No	Torrubiella hemipterigena	Ascomycota	Eukaryota	Fungi	Ascomycota	Sordariomycetes	Hypocreales	Clavicipitaceae	Torrubiella	Torrubiella hemipterigena	1531966
tr|A8N617|A8N617_COPC7	A8N617	HC	True	157		NA	1	0	p20[10:164]	690	No	No	Coprinopsis cinerea okayama7#130	Basidiomycota	Eukaryota	Fungi	Basidiomycota	Agaricomycetes	Agaricales	Psathyrellaceae	Coprinopsis	Coprinopsis cinerea	240176
tr|G4TFX7|G4TFX7_SERID	G4TFX7	HC	True	186		NA	1	0	p20[8:191]	325	No	No	Serendipita indica DSM 11827	Basidiomycota	Eukaryota	Fungi	Basidiomycota	Agaricomycetes	Sebacinales	Serendipitaceae	Serendipita	Serendipita indica	1109443
tr|G4TFV5|G4TFV5_SERID	G4TFV5	HC	True	188		NA	1	0	p20[34:221]	462	No	No	Serendipita indica DSM 11827	Basidiomycota	Eukaryota	Fungi	Basidiomycota	Agaricomycetes	Sebacinales	Serendipitaceae	Serendipita	Serendipita indica	1109443
tr|G4T652|G4T652_SERID	G4T652	HC	True	169		NA	1	0	p20[7:162]	483	No	No	Serendipita indica DSM 11827	Basidiomycota	Eukaryota	Fungi	Basidiomycota	Agaricomycetes	Sebacinales	Serendipitaceae	Serendipita	Serendipita indica	1109443
tr|A8NBH8|A8NBH8_COPC7	A8NBH8	HC	True	164		NA	1	0	p20[10:169]	723	No	No	Coprinopsis cinerea okayama7#130	Basidiomycota	Eukaryota	Fungi	Basidiomycota	Agaricomycetes	Agaricales	Psathyrellaceae	Coprinopsis	Coprinopsis cinerea	240176
tr|G4TFV3|G4TFV3_SERID	G4TFV3	HC	True	188		NA	1	0	p20[10:196]	460	No	No	Serendipita indica DSM 11827	Basidiomycota	Eukaryota	Fungi	Basidiomycota	Agaricomycetes	Sebacinales	Serendipitaceae	Serendipita	Serendipita indica	1109443
tr|G4TGX1|G4TGX1_SERID	G4TGX1	HC	True	195		NA	1	0	p20[197:389]	773	No	No	Serendipita indica DSM 11827	Basidiomycota	Eukaryota	Fungi	Basidiomycota	Agaricomycetes	Sebacinales	Serendipitaceae	Serendipita	Serendipita indica	1109443
tr|G4TFV6|G4TFV6_SERID	G4TFV6	HC	True	176		NA	1	0	p20[151:326]	550	No	No	Serendipita indica DSM 11827	Basidiomycota	Eukaryota	Fungi	Basidiomycota	Agaricomycetes	Sebacinales	Serendipitaceae	Serendipita	Serendipita indica	1109443
tr|D6RMA6|D6RMA6_COPC7	D6RMA6	HC	True	152		NA	1	0	p20[4:155]	652	No	No	Coprinopsis cinerea okayama7#130	Basidiomycota	Eukaryota	Fungi	Basidiomycota	Agaricomycetes	Agaricales	Psathyrellaceae	Coprinopsis	Coprinopsis cinerea	240176
tr|A8N077|A8N077_COPC7	A8N077	HC	True	147		NA	1	0	p20[206:351]	442	No	No	Coprinopsis cinerea okayama7#130	Basidiomycota	Eukaryota	Fungi	Basidiomycota	Agaricomycetes	Agaricales	Psathyrellaceae	Coprinopsis	Coprinopsis cinerea	240176
tr|A8NJS1|A8NJS1_COPC7	A8NJS1	HC	True	152		NA	1	0	p20[10:161]	938	No	No	Coprinopsis cinerea okayama7#130	Basidiomycota	Eukaryota	Fungi	Basidiomycota	Agaricomycetes	Agaricales	Psathyrellaceae	Coprinopsis	Coprinopsis cinerea	240176
tr|A0A0C3FZH0|A0A0C3FZH0_9HOMO	A0A0C3FZH0	HC	True	172		NA	1	0	p20[22:181]	665	No	No	Piloderma croceum F 1598	Basidiomycota	Eukaryota	Fungi	Basidiomycota	Agaricomycetes	Atheliales	Atheliaceae	Piloderma	Piloderma croceum	765440
tr|A0A366S3P6|A0A366S3P6_9HYPO	A0A366S3P6	HC	True	166		NA	1	0	p20[9:174]	662	No	No	Fusarium sp. FIESC_28	Ascomycota	Eukaryota	Fungi	Ascomycota	Sordariomycetes	Hypocreales	Nectriaceae	Fusarium	Fusarium sp. FIESC_28	2109339
tr|A0A0C3B3D8|A0A0C3B3D8_9HOMO	A0A0C3B3D8	HC	True	176		NA	1	0	p20[82:257]	712	No	No	Piloderma croceum F 1598	Basidiomycota	Eukaryota	Fungi	Basidiomycota	Agaricomycetes	Atheliales	Atheliaceae	Piloderma	Piloderma croceum	765440
tr|A0A0C3AMR9|A0A0C3AMR9_9HOMO	A0A0C3AMR9	HC	True	172		NA	1	0	p20[29:194]	452	No	No	Piloderma croceum F 1598	Basidiomycota	Eukaryota	Fungi	Basidiomycota	Agaricomycetes	Atheliales	Atheliaceae	Piloderma	Piloderma croceum	765440
tr|A0A364MWM0|A0A364MWM0_9PLEO	A0A364MWM0	HC	True	175		NA	1	0	p20[55:229]	600	No	No	Stemphylium lycopersici	Ascomycota	Eukaryota	Fungi	Ascomycota	Dothideomycetes	Pleosporales	Pleosporaceae	Stemphylium	Stemphylium lycopersici	183478
tr|A0A366QX80|A0A366QX80_9HYPO	A0A366QX80	HC	True	175		NA	1	0	p20[8:182]	637	No	No	Fusarium sp. FIESC_28	Ascomycota	Eukaryota	Fungi	Ascomycota	Sordariomycetes	Hypocreales	Nectriaceae	Fusarium	Fusarium sp. FIESC_28	2109339
tr|A0A0C3EZQ7|A0A0C3EZQ7_9HOMO	A0A0C3EZQ7	HC	True	154		NA	1	0	p20[15:168]	682	No	No	Piloderma croceum F 1598	Basidiomycota	Eukaryota	Fungi	Basidiomycota	Agaricomycetes	Atheliales	Atheliaceae	Piloderma	Piloderma croceum	765440
tr|A0A0C3G890|A0A0C3G890_9HOMO	A0A0C3G890	HC	True	170		NA	1	0	p20[4:170]	379	No	No	Piloderma croceum F 1598	Basidiomycota	Eukaryota	Fungi	Basidiomycota	Agaricomycetes	Atheliales	Atheliaceae	Piloderma	Piloderma croceum	765440
tr|T0L199|T0L199_COLGC	T0L199	HC	True	180		NA	1	0	p20[5:184]	659	No	No	Colletotrichum gloeosporioides Cg-14	Ascomycota	Eukaryota	Fungi	Ascomycota	Sordariomycetes	Glomerellales	Glomerellaceae	Colletotrichum	Colletotrichum gloeosporioides	1237896
tr|T0LLF9|T0LLF9_COLGC	T0LLF9	HC	True	193		NA	1	0	p20[5:190]	602	No	No	Colletotrichum gloeosporioides Cg-14	Ascomycota	Eukaryota	Fungi	Ascomycota	Sordariomycetes	Glomerellales	Glomerellaceae	Colletotrichum	Colletotrichum gloeosporioides	1237896
tr|A0A2J6T6I1|A0A2J6T6I1_9HELO	A0A2J6T6I1	HC	True	180		NA	1	0	p20[23:202]	608	No	No	Meliniomyces bicolor E	Ascomycota	Eukaryota	Fungi	Ascomycota	Leotiomycetes	Helotiales	Helotiaceae	Meliniomyces	Meliniomyces bicolor	1095630
tr|A0A0P7BNX8|A0A0P7BNX8_9HYPO	A0A0P7BNX8	HC	True	167		NA	1	0	p20[13:174]	640	No	No	Neonectria ditissima	Ascomycota	Eukaryota	Fungi	Ascomycota	Sordariomycetes	Hypocreales	Nectriaceae	Neonectria	Neonectria ditissima	78410
tr|A0A2J6TCL5|A0A2J6TCL5_9HELO	A0A2J6TCL5	HC	True	144		NA	1	0	p20[12:154]	604	No	No	Meliniomyces bicolor E	Ascomycota	Eukaryota	Fungi	Ascomycota	Leotiomycetes	Helotiales	Helotiaceae	Meliniomyces	Meliniomyces bicolor	1095630
tr|U4LKW5|U4LKW5_PYROM	U4LKW5	HC	True	170		NA	1	0	p20[43:211]	350	No	No	Pyronema omphalodes CBS 100304	Ascomycota	Eukaryota	Fungi	Ascomycota	Pezizomycetes	Pezizales	Pyronemataceae	Pyronema	Pyronema omphalodes	1076935
tr|A0A0C3FZG7|A0A0C3FZG7_9HOMO	A0A0C3FZG7	HC	True	175		NA	1	0	p20[73:247]	710	No	No	Piloderma croceum F 1598	Basidiomycota	Eukaryota	Fungi	Basidiomycota	Agaricomycetes	Atheliales	Atheliaceae	Piloderma	Piloderma croceum	765440
tr|U4LGM9|U4LGM9_PYROM	U4LGM9	HC	True	189		NA	1	0	p20[40:225]	353	No	No	Pyronema omphalodes CBS 100304	Ascomycota	Eukaryota	Fungi	Ascomycota	Pezizomycetes	Pezizales	Pyronemataceae	Pyronema	Pyronema omphalodes	1076935
tr|A0A0C3G165|A0A0C3G165_9HOMO	A0A0C3G165	HC	True	179		NA	1	0	p20[14:192]	405	No	No	Piloderma croceum F 1598	Basidiomycota	Eukaryota	Fungi	Basidiomycota	Agaricomycetes	Atheliales	Atheliaceae	Piloderma	Piloderma croceum	765440
tr|A0A0C3BDP7|A0A0C3BDP7_9HOMO	A0A0C3BDP7	HC	True	176		NA	1	0	p20[62:236]	444	No	No	Piloderma croceum F 1598	Basidiomycota	Eukaryota	Fungi	Basidiomycota	Agaricomycetes	Atheliales	Atheliaceae	Piloderma	Piloderma croceum	765440
tr|A0A0C3BBH2|A0A0C3BBH2_9HOMO	A0A0C3BBH2	HC	True	160		NA	1	0	p20[4:163]	643	No	No	Piloderma croceum F 1598	Basidiomycota	Eukaryota	Fungi	Basidiomycota	Agaricomycetes	Atheliales	Atheliaceae	Piloderma	Piloderma croceum	765440
tr|A0A0C3FDX9|A0A0C3FDX9_9HOMO	A0A0C3FDX9	HC	True	178		NA	1	0	p20[70:246]	709	No	No	Piloderma croceum F 1598	Basidiomycota	Eukaryota	Fungi	Basidiomycota	Agaricomycetes	Atheliales	Atheliaceae	Piloderma	Piloderma croceum	765440
tr|A0A0C3BEX7|A0A0C3BEX7_9HOMO	A0A0C3BEX7	HC	True	171		NA	1	0	p20[6:170]	632	No	No	Piloderma croceum F 1598	Basidiomycota	Eukaryota	Fungi	Basidiomycota	Agaricomycetes	Atheliales	Atheliaceae	Piloderma	Piloderma croceum	765440
tr|A0A0C3FC49|A0A0C3FC49_9HOMO	A0A0C3FC49	HC	True	152		NA	1	0	p20[32:183]	682	No	No	Piloderma croceum F 1598	Basidiomycota	Eukaryota	Fungi	Basidiomycota	Agaricomycetes	Atheliales	Atheliaceae	Piloderma	Piloderma croceum	765440
tr|A0A0C3EIT8|A0A0C3EIT8_9HOMO	A0A0C3EIT8	HC	True	195		NA	1	0	p20[72:266]	388	No	No	Piloderma croceum F 1598	Basidiomycota	Eukaryota	Fungi	Basidiomycota	Agaricomycetes	Atheliales	Atheliaceae	Piloderma	Piloderma croceum	765440
tr|T0KW46|T0KW46_COLGC	T0KW46	HC	True	151		NA	1	0	p20[11:156]	648	No	No	Colletotrichum gloeosporioides Cg-14	Ascomycota	Eukaryota	Fungi	Ascomycota	Sordariomycetes	Glomerellales	Glomerellaceae	Colletotrichum	Colletotrichum gloeosporioides	1237896
tr|A0A0C3CPR7|A0A0C3CPR7_9HOMO	A0A0C3CPR7	HC	True	173		NA	1	0	p20[59:231]	686	No	No	Piloderma croceum F 1598	Basidiomycota	Eukaryota	Fungi	Basidiomycota	Agaricomycetes	Atheliales	Atheliaceae	Piloderma	Piloderma croceum	765440
tr|A0A0C3C4B9|A0A0C3C4B9_9HOMO	A0A0C3C4B9	YC	Pseudo	177		NA	1	0	p20[5:181]	363	No	No	Piloderma croceum F 1598	Basidiomycota	Eukaryota	Fungi	Basidiomycota	Agaricomycetes	Atheliales	Atheliaceae	Piloderma	Piloderma croceum	765440
tr|A0A0C3AXI7|A0A0C3AXI7_9HOMO	A0A0C3AXI7	HC	True	166		NA	1	0	p20[54:212]	714	No	No	Piloderma croceum F 1598	Basidiomycota	Eukaryota	Fungi	Basidiomycota	Agaricomycetes	Atheliales	Atheliaceae	Piloderma	Piloderma croceum	765440
tr|A0A0C3FIT4|A0A0C3FIT4_9HOMO	A0A0C3FIT4	HC	True	158		NA	1	0	p20[47:204]	707	No	No	Piloderma croceum F 1598	Basidiomycota	Eukaryota	Fungi	Basidiomycota	Agaricomycetes	Atheliales	Atheliaceae	Piloderma	Piloderma croceum	765440
tr|T0KI63|T0KI63_COLGC	T0KI63	HC	True	173		NA	1	0	p20[23:190]	633	No	No	Colletotrichum gloeosporioides Cg-14	Ascomycota	Eukaryota	Fungi	Ascomycota	Sordariomycetes	Glomerellales	Glomerellaceae	Colletotrichum	Colletotrichum gloeosporioides	1237896
tr|A0A2J6TWV5|A0A2J6TWV5_9HELO	A0A2J6TWV5	HC	True	179		NA	1	0	p20[41:219]	736	No	No	Meliniomyces bicolor E	Ascomycota	Eukaryota	Fungi	Ascomycota	Leotiomycetes	Helotiales	Helotiaceae	Meliniomyces	Meliniomyces bicolor	1095630
tr|A0A0C3F7P3|A0A0C3F7P3_9HOMO	A0A0C3F7P3	HC	True	166		NA	1	0	p20[54:212]	714	No	No	Piloderma croceum F 1598	Basidiomycota	Eukaryota	Fungi	Basidiomycota	Agaricomycetes	Atheliales	Atheliaceae	Piloderma	Piloderma croceum	765440
tr|A0A0C3B9B5|A0A0C3B9B5_9HOMO	A0A0C3B9B5	YL	Pseudo	147		NA	1	0	p20[12:157]	576	No	No	Piloderma croceum F 1598	Basidiomycota	Eukaryota	Fungi	Basidiomycota	Agaricomycetes	Atheliales	Atheliaceae	Piloderma	Piloderma croceum	765440
tr|A0A0C3FH17|A0A0C3FH17_9HOMO	A0A0C3FH17	HC	True	177		NA	1	0	p20[137:313]	779	No	No	Piloderma croceum F 1598	Basidiomycota	Eukaryota	Fungi	Basidiomycota	Agaricomycetes	Atheliales	Atheliaceae	Piloderma	Piloderma croceum	765440
tr|A0A2J6SJY0|A0A2J6SJY0_9HELO	A0A2J6SJY0	HC	True	156		NA	1	0	p20[13:168]	658	No	No	Meliniomyces bicolor E	Ascomycota	Eukaryota	Fungi	Ascomycota	Leotiomycetes	Helotiales	Helotiaceae	Meliniomyces	Meliniomyces bicolor	1095630
tr|A0A0C3ERF9|A0A0C3ERF9_9HOMO	A0A0C3ERF9	HC	True	151		NA	1	0	p20[21:170]	671	No	No	Piloderma croceum F 1598	Basidiomycota	Eukaryota	Fungi	Basidiomycota	Agaricomycetes	Atheliales	Atheliaceae	Piloderma	Piloderma croceum	765440
tr|A0A0C3FE12|A0A0C3FE12_9HOMO	A0A0C3FE12	HC	True	168		NA	1	0	p20[58:225]	694	No	No	Piloderma croceum F 1598	Basidiomycota	Eukaryota	Fungi	Basidiomycota	Agaricomycetes	Atheliales	Atheliaceae	Piloderma	Piloderma croceum	765440
tr|A0A0C3F7C1|A0A0C3F7C1_9HOMO	A0A0C3F7C1	HC	True	166		NA	1	0	p20[64:220]	454	No	No	Piloderma croceum F 1598	Basidiomycota	Eukaryota	Fungi	Basidiomycota	Agaricomycetes	Atheliales	Atheliaceae	Piloderma	Piloderma croceum	765440
tr|A0A2J6SKP1|A0A2J6SKP1_9HELO	A0A2J6SKP1	HC	True	161		NA	1	0	p20[3:157]	672	No	No	Meliniomyces bicolor E	Ascomycota	Eukaryota	Fungi	Ascomycota	Leotiomycetes	Helotiales	Helotiaceae	Meliniomyces	Meliniomyces bicolor	1095630
tr|A0A231MLP3|A0A231MLP3_9EURO	A0A231MLP3	HC	True	157		NA	1	0	p20[24:180]	664	No	No	Aspergillus thermomutatus	Ascomycota	Eukaryota	Fungi	Ascomycota	Eurotiomycetes	Eurotiales	Aspergillaceae	Aspergillus	Aspergillus thermomutatus	41047
tr|A0A0C3FZH4|A0A0C3FZH4_9HOMO	A0A0C3FZH4	HC	True	171		NA	1	0	p20[151:318]	853	No	No	Piloderma croceum F 1598	Basidiomycota	Eukaryota	Fungi	Basidiomycota	Agaricomycetes	Atheliales	Atheliaceae	Piloderma	Piloderma croceum	765440
tr|A0A0C3BEZ4|A0A0C3BEZ4_9HOMO	A0A0C3BEZ4	HC	True	165		NA	1	0	p20[177:341]	820	No	No	Piloderma croceum F 1598	Basidiomycota	Eukaryota	Fungi	Basidiomycota	Agaricomycetes	Atheliales	Atheliaceae	Piloderma	Piloderma croceum	765440
tr|A0A0C3FH13|A0A0C3FH13_9HOMO	A0A0C3FH13	HC	True	160		NA	1	0	p20[348:507]	1003	No	No	Piloderma croceum F 1598	Basidiomycota	Eukaryota	Fungi	Basidiomycota	Agaricomycetes	Atheliales	Atheliaceae	Piloderma	Piloderma croceum	765440
tr|A0A1Y2IMK0|A0A1Y2IMK0_PYCCO	A0A1Y2IMK0	HC	True	168		NA	1	0	p20[15:181]	345	No	No	Trametes coccinea BRFM310	Basidiomycota	Eukaryota	Fungi	Basidiomycota	Agaricomycetes	Polyporales	Polyporaceae	Trametes	Trametes coccinea	1353009
tr|A0A194WRK9|A0A194WRK9_9HELO	A0A194WRK9	HC	True	160		NA	1	0	p20[126:285]	365	No	No	Phialocephala scopiformis	Ascomycota	Eukaryota	Fungi	Ascomycota	Leotiomycetes	Helotiales	NA	Phialocephala	Phialocephala scopiformis	149040
tr|A0A2I2G691|A0A2I2G691_9EURO	A0A2I2G691	HC	True	191		NA	1	0	p20[12:202]	1796	No	No	Aspergillus steynii IBT 23096	Ascomycota	Eukaryota	Fungi	Ascomycota	Eurotiomycetes	Eurotiales	Aspergillaceae	Aspergillus	Aspergillus steynii	1392250
tr|A0A194XBC7|A0A194XBC7_9HELO	A0A194XBC7	HC	True	150		NA	1	0	p20[309:458]	935	No	No	Phialocephala scopiformis	Ascomycota	Eukaryota	Fungi	Ascomycota	Leotiomycetes	Helotiales	NA	Phialocephala	Phialocephala scopiformis	149040
tr|A0A132BC46|A0A132BC46_9HELO	A0A132BC46	HC	True	195		NA	1	0	p20[9:203]	678	No	No	Phialocephala scopiformis	Ascomycota	Eukaryota	Fungi	Ascomycota	Leotiomycetes	Helotiales	NA	Phialocephala	Phialocephala scopiformis	149040
tr|A0A194XMB4|A0A194XMB4_9HELO	A0A194XMB4	HC	True	103		NA	1	0	p20[95:196]	282	No	No	Phialocephala scopiformis	Ascomycota	Eukaryota	Fungi	Ascomycota	Leotiomycetes	Helotiales	NA	Phialocephala	Phialocephala scopiformis	149040
tr|A0A1Y2J192|A0A1Y2J192_PYCCO	A0A1Y2J192	HC	True	149		NA	1	0	p20[7:155]	656	No	No	Trametes coccinea BRFM310	Basidiomycota	Eukaryota	Fungi	Basidiomycota	Agaricomycetes	Polyporales	Polyporaceae	Trametes	Trametes coccinea	1353009
tr|A0A2V1BAQ5|A0A2V1BAQ5_9HELO	A0A2V1BAQ5	HC	True	149		NA	1	0	p20[5:153]	669	No	No	Cadophora sp. DSE1049	Ascomycota	Eukaryota	Fungi	Ascomycota	Leotiomycetes	Helotiales	NA	Cadophora	Cadophora sp. DSE1049	1485229
tr|A0A2V1D4I9|A0A2V1D4I9_9PLEO	A0A2V1D4I9	HC	True	170		NA	1	0	p20[8:177]	873	No	No	Periconia macrospinosa	Ascomycota	Eukaryota	Fungi	Ascomycota	Dothideomycetes	Pleosporales	Periconiaceae	Periconia	Periconia macrospinosa	97972
tr|E3QTU2|E3QTU2_COLGM	E3QTU2	HC	True	149		NA	1	0	p20[11:159]	593	No	No	Colletotrichum graminicola M1.001	Ascomycota	Eukaryota	Fungi	Ascomycota	Sordariomycetes	Glomerellales	Glomerellaceae	Colletotrichum	Colletotrichum graminicola	645133
tr|A0A0D0AHF1|A0A0D0AHF1_9HOMO	A0A0D0AHF1	HC	True	147		NA	1	0	p20[96:241]	319	No	No	Suillus luteus UH-Slu-Lm8-n1	Basidiomycota	Eukaryota	Fungi	Basidiomycota	Agaricomycetes	Boletales	Suillaceae	Suillus	Suillus luteus	930992
tr|A0A0D0A9V3|A0A0D0A9V3_9HOMO	A0A0D0A9V3	HC	True	162		NA	1	0	p20[14:175]	377	No	No	Suillus luteus UH-Slu-Lm8-n1	Basidiomycota	Eukaryota	Fungi	Basidiomycota	Agaricomycetes	Boletales	Suillaceae	Suillus	Suillus luteus	930992
tr|A0A0C9ZTM4|A0A0C9ZTM4_9HOMO	A0A0C9ZTM4	HC	True	173		NA	1	0	p20[37:117]	312	No	No	Suillus luteus UH-Slu-Lm8-n1	Basidiomycota	Eukaryota	Fungi	Basidiomycota	Agaricomycetes	Boletales	Suillaceae	Suillus	Suillus luteus	930992
tr|A0A0C9ZSF7|A0A0C9ZSF7_9HOMO	A0A0C9ZSF7	HC	True	153		NA	1	0	p20[7:159]	650	No	No	Suillus luteus UH-Slu-Lm8-n1	Basidiomycota	Eukaryota	Fungi	Basidiomycota	Agaricomycetes	Boletales	Suillaceae	Suillus	Suillus luteus	930992
tr|A0A1V6U850|A0A1V6U850_9EURO	A0A1V6U850	HC	True	150		NA	1	0	p20[5:148]	635	No	No	Penicillium coprophilum	Ascomycota	Eukaryota	Fungi	Ascomycota	Eurotiomycetes	Eurotiales	Aspergillaceae	Penicillium	Penicillium coprophilum	36646
tr|A0A0D0BVH8|A0A0D0BVH8_9HOMO	A0A0D0BVH8	HC	True	163		NA	1	0	p20[13:175]	364	No	No	Suillus luteus UH-Slu-Lm8-n1	Basidiomycota	Eukaryota	Fungi	Basidiomycota	Agaricomycetes	Boletales	Suillaceae	Suillus	Suillus luteus	930992
tr|J4GQX9|J4GQX9_9APHY	J4GQX9	HC	True	175		NA	1	0	p20[13:187]	335	No	No	Fibroporia radiculosa	Basidiomycota	Eukaryota	Fungi	Basidiomycota	Agaricomycetes	Polyporales	NA	Fibroporia	Fibroporia radiculosa	599839
tr|J4G1U3|J4G1U3_9APHY	J4G1U3	HC	True	176		NA	1	0	p20[91:255]	734	No	No	Fibroporia radiculosa	Basidiomycota	Eukaryota	Fungi	Basidiomycota	Agaricomycetes	Polyporales	NA	Fibroporia	Fibroporia radiculosa	599839
tr|N1S1T0|N1S1T0_FUSC4	N1S1T0	HC	True	158		NA	1	0	p20[10:167]	675	No	No	Fusarium oxysporum f. sp. cubense race 4	Ascomycota	Eukaryota	Fungi	Ascomycota	Sordariomycetes	Hypocreales	Nectriaceae	Fusarium	Fusarium oxysporum	1229665
tr|J4IC83|J4IC83_9APHY	J4IC83	HC	True	157		NA	1	0	p20[36:189]	680	No	No	Fibroporia radiculosa	Basidiomycota	Eukaryota	Fungi	Basidiomycota	Agaricomycetes	Polyporales	NA	Fibroporia	Fibroporia radiculosa	599839
tr|N1RQM3|N1RQM3_FUSC4	N1RQM3	HC	True	168		NA	1	0	p20[12:179]	645	No	No	Fusarium oxysporum f. sp. cubense race 4	Ascomycota	Eukaryota	Fungi	Ascomycota	Sordariomycetes	Hypocreales	Nectriaceae	Fusarium	Fusarium oxysporum	1229665
tr|A0A2H3GKE8|A0A2H3GKE8_FUSOX	A0A2H3GKE8	HC	True	153		NA	1	0	p20[2:154]	662	No	No	Fusarium oxysporum f. sp. radicis-cucumerinum	Ascomycota	Eukaryota	Fungi	Ascomycota	Sordariomycetes	Hypocreales	Nectriaceae	Fusarium	Fusarium oxysporum	327505
tr|J4GMZ0|J4GMZ0_9APHY	J4GMZ0	HC	True	178		NA	1	0	p20[46:219]	686	No	No	Fibroporia radiculosa	Basidiomycota	Eukaryota	Fungi	Basidiomycota	Agaricomycetes	Polyporales	NA	Fibroporia	Fibroporia radiculosa	599839
tr|J4HV41|J4HV41_9APHY	J4HV41	HC	True	188		NA	1	0	p20[25:212]	668	No	No	Fibroporia radiculosa	Basidiomycota	Eukaryota	Fungi	Basidiomycota	Agaricomycetes	Polyporales	NA	Fibroporia	Fibroporia radiculosa	599839
tr|A0A0G4M8R2|A0A0G4M8R2_9PEZI	A0A0G4M8R2	HC	True	160		NA	1	0	p20[46:205]	274	No	No	Verticillium longisporum	Ascomycota	Eukaryota	Fungi	Ascomycota	Sordariomycetes	Glomerellales	Plectosphaerellaceae	Verticillium	Verticillium longisporum	100787
tr|J4H4Z4|J4H4Z4_9APHY	J4H4Z4	HC	True	198		NA	1	0	p20[17:210]	479	No	No	Fibroporia radiculosa	Basidiomycota	Eukaryota	Fungi	Basidiomycota	Agaricomycetes	Polyporales	NA	Fibroporia	Fibroporia radiculosa	599839
tr|A0A0G4NLC2|A0A0G4NLC2_9PEZI	A0A0G4NLC2	HC	True	160		NA	1	0	p20[120:279]	360	No	No	Verticillium longisporum	Ascomycota	Eukaryota	Fungi	Ascomycota	Sordariomycetes	Glomerellales	Plectosphaerellaceae	Verticillium	Verticillium longisporum	100787
tr|J4G152|J4G152_9APHY	J4G152	HC	True	181		NA	1	0	p20[225:403]	905	No	No	Fibroporia radiculosa	Basidiomycota	Eukaryota	Fungi	Basidiomycota	Agaricomycetes	Polyporales	NA	Fibroporia	Fibroporia radiculosa	599839
tr|J4GL52|J4GL52_9APHY	J4GL52	HC	True	176		NA	1	0	p20[282:455]	1180	No	No	Fibroporia radiculosa	Basidiomycota	Eukaryota	Fungi	Basidiomycota	Agaricomycetes	Polyporales	NA	Fibroporia	Fibroporia radiculosa	599839
tr|J4HSR9|J4HSR9_9APHY	J4HSR9	HC	True	188		NA	1	0	p20[7:194]	650	No	No	Fibroporia radiculosa	Basidiomycota	Eukaryota	Fungi	Basidiomycota	Agaricomycetes	Polyporales	NA	Fibroporia	Fibroporia radiculosa	599839
tr|J4I944|J4I944_9APHY	J4I944	HC	True	172		NA	1	0	p20[99:269]	740	No	No	Fibroporia radiculosa	Basidiomycota	Eukaryota	Fungi	Basidiomycota	Agaricomycetes	Polyporales	NA	Fibroporia	Fibroporia radiculosa	599839
tr|B8M572|B8M572_TALSN	B8M572	HC	True	160		NA	1	0	p20[138:297]	367	No	No	Talaromyces stipitatus ATCC 10500	Ascomycota	Eukaryota	Fungi	Ascomycota	Eurotiomycetes	Eurotiales	Trichocomaceae	Talaromyces	Talaromyces stipitatus	441959
tr|A0A1Y2DP45|A0A1Y2DP45_9PEZI	A0A1Y2DP45	HC	True	134		NA	1	0	p20[1:134]	215	No	No	Pseudomassariella vexata	Ascomycota	Eukaryota	Fungi	Ascomycota	Sordariomycetes	Xylariales	Pseudomassariaceae	Pseudomassariella	Pseudomassariella vexata	1141098
tr|A0A165YZX3|A0A165YZX3_9HOMO	A0A165YZX3	HC	True	152		NA	1	0	p20[12:163]	232	No	No	Sistotremastrum suecicum HHB10207 ss-3	Basidiomycota	Eukaryota	Fungi	Basidiomycota	Agaricomycetes	Trechisporales	Hydnodontaceae	Sistotremastrum	Sistotremastrum suecicum	1314776
tr|A0A166C3L6|A0A166C3L6_9HOMO	A0A166C3L6	HC	True	175		NA	1	0	p20[55:229]	451	No	No	Sistotremastrum suecicum HHB10207 ss-3	Basidiomycota	Eukaryota	Fungi	Basidiomycota	Agaricomycetes	Trechisporales	Hydnodontaceae	Sistotremastrum	Sistotremastrum suecicum	1314776
tr|M2RDJ4|M2RDJ4_COCSN	M2RDJ4	HC	True	149		NA	1	0	p20[7:155]	638	No	No	Bipolaris sorokiniana ND90Pr	Ascomycota	Eukaryota	Fungi	Ascomycota	Dothideomycetes	Pleosporales	Pleosporaceae	Bipolaris	Bipolaris sorokiniana	665912
tr|A0A166ADB4|A0A166ADB4_9HOMO	A0A166ADB4	HC	True	158		NA	1	0	p20[77:234]	341	No	No	Sistotremastrum suecicum HHB10207 ss-3	Basidiomycota	Eukaryota	Fungi	Basidiomycota	Agaricomycetes	Trechisporales	Hydnodontaceae	Sistotremastrum	Sistotremastrum suecicum	1314776
tr|A0A093YB15|A0A093YB15_9PEZI	A0A093YB15	HC	True	164		NA	1	0	p20[77:221]	628	No	No	Pseudogymnoascus sp. VKM F-3557	Ascomycota	Eukaryota	Fungi	Ascomycota	Leotiomycetes	NA	Pseudeurotiaceae	Pseudogymnoascus	Pseudogymnoascus sp. VKM F-3557	1437433
tr|A0A165YZT7|A0A165YZT7_9HOMO	A0A165YZT7	HC	True	159		NA	1	0	p20[71:229]	340	No	No	Sistotremastrum suecicum HHB10207 ss-3	Basidiomycota	Eukaryota	Fungi	Basidiomycota	Agaricomycetes	Trechisporales	Hydnodontaceae	Sistotremastrum	Sistotremastrum suecicum	1314776
tr|A0A166ADA0|A0A166ADA0_9HOMO	A0A166ADA0	HC	True	159		NA	1	0	p20[214:372]	565	No	No	Sistotremastrum suecicum HHB10207 ss-3	Basidiomycota	Eukaryota	Fungi	Basidiomycota	Agaricomycetes	Trechisporales	Hydnodontaceae	Sistotremastrum	Sistotremastrum suecicum	1314776
tr|A0A166C3I7|A0A166C3I7_9HOMO	A0A166C3I7	HC	True	174		NA	1	0	p20[24:197]	410	No	No	Sistotremastrum suecicum HHB10207 ss-3	Basidiomycota	Eukaryota	Fungi	Basidiomycota	Agaricomycetes	Trechisporales	Hydnodontaceae	Sistotremastrum	Sistotremastrum suecicum	1314776
tr|A0A1S8VJ85|A0A1S8VJ85_9FUNG	A0A1S8VJ85	HC	True	167		NA	1	0	p20[110:276]	349	No	No	Batrachochytrium salamandrivorans	Chytridiomycota	Eukaryota	Fungi	Chytridiomycota	Chytridiomycetes	Rhizophydiales	NA	Batrachochytrium	Batrachochytrium salamandrivorans	1357716
tr|A0A166I120|A0A166I120_9HOMO	A0A166I120	LC	Pseudo	168		NA	1	0	p20[115:278]	783	No	No	Sistotremastrum suecicum HHB10207 ss-3	Basidiomycota	Eukaryota	Fungi	Basidiomycota	Agaricomycetes	Trechisporales	Hydnodontaceae	Sistotremastrum	Sistotremastrum suecicum	1314776
tr|A0A166I1L3|A0A166I1L3_9HOMO	A0A166I1L3	HC	True	165		NA	1	0	p20[10:174]	678	No	No	Sistotremastrum suecicum HHB10207 ss-3	Basidiomycota	Eukaryota	Fungi	Basidiomycota	Agaricomycetes	Trechisporales	Hydnodontaceae	Sistotremastrum	Sistotremastrum suecicum	1314776
tr|A0A166FJB3|A0A166FJB3_9HOMO	A0A166FJB3	HC	True	159		NA	1	0	p20[1:159]	172	No	No	Sistotremastrum suecicum HHB10207 ss-3	Basidiomycota	Eukaryota	Fungi	Basidiomycota	Agaricomycetes	Trechisporales	Hydnodontaceae	Sistotremastrum	Sistotremastrum suecicum	1314776
tr|A0A165YZY3|A0A165YZY3_9HOMO	A0A165YZY3	HC	True	156		NA	1	0	p20[75:230]	345	No	No	Sistotremastrum suecicum HHB10207 ss-3	Basidiomycota	Eukaryota	Fungi	Basidiomycota	Agaricomycetes	Trechisporales	Hydnodontaceae	Sistotremastrum	Sistotremastrum suecicum	1314776
tr|A0A166D7E9|A0A166D7E9_9HOMO	A0A166D7E9	HC	True	184		NA	1	0	p20[54:237]	242	No	No	Sistotremastrum suecicum HHB10207 ss-3	Basidiomycota	Eukaryota	Fungi	Basidiomycota	Agaricomycetes	Trechisporales	Hydnodontaceae	Sistotremastrum	Sistotremastrum suecicum	1314776
tr|A0A166C3J3|A0A166C3J3_9HOMO	A0A166C3J3	HS	Pseudo	162		NA	1	0	p20[22:182]	202	No	No	Sistotremastrum suecicum HHB10207 ss-3	Basidiomycota	Eukaryota	Fungi	Basidiomycota	Agaricomycetes	Trechisporales	Hydnodontaceae	Sistotremastrum	Sistotremastrum suecicum	1314776
tr|A0A166C3M9|A0A166C3M9_9HOMO	A0A166C3M9	HC	True	187		NA	1	0	p20[67:253]	424	No	No	Sistotremastrum suecicum HHB10207 ss-3	Basidiomycota	Eukaryota	Fungi	Basidiomycota	Agaricomycetes	Trechisporales	Hydnodontaceae	Sistotremastrum	Sistotremastrum suecicum	1314776
tr|A0A0D2L6R9|A0A0D2L6R9_9AGAR	A0A0D2L6R9	HC	True	187		NA	1	0	p20[93:279]	773	No	No	Hypholoma sublateritium FD-334 SS-4	Basidiomycota	Eukaryota	Fungi	Basidiomycota	Agaricomycetes	Agaricales	Strophariaceae	Hypholoma	Hypholoma sublateritium	945553
tr|A0A0D2MF49|A0A0D2MF49_9AGAR	A0A0D2MF49	HC	True	151		NA	1	0	p20[11:161]	375	No	No	Hypholoma sublateritium FD-334 SS-4	Basidiomycota	Eukaryota	Fungi	Basidiomycota	Agaricomycetes	Agaricales	Strophariaceae	Hypholoma	Hypholoma sublateritium	945553
tr|A0A0D2PZV4|A0A0D2PZV4_9AGAR	A0A0D2PZV4	HC	True	166		NA	1	0	p20[12:177]	792	No	No	Hypholoma sublateritium FD-334 SS-4	Basidiomycota	Eukaryota	Fungi	Basidiomycota	Agaricomycetes	Agaricales	Strophariaceae	Hypholoma	Hypholoma sublateritium	945553
tr|A0A0D2NV35|A0A0D2NV35_9AGAR	A0A0D2NV35	HC	True	163		NA	1	0	p20[37:195]	675	No	No	Hypholoma sublateritium FD-334 SS-4	Basidiomycota	Eukaryota	Fungi	Basidiomycota	Agaricomycetes	Agaricales	Strophariaceae	Hypholoma	Hypholoma sublateritium	945553
tr|A0A0D2MYQ7|A0A0D2MYQ7_9AGAR	A0A0D2MYQ7	HC	True	182		NA	1	0	p20[15:195]	676	No	No	Hypholoma sublateritium FD-334 SS-4	Basidiomycota	Eukaryota	Fungi	Basidiomycota	Agaricomycetes	Agaricales	Strophariaceae	Hypholoma	Hypholoma sublateritium	945553
tr|A0A0D2L6Q3|A0A0D2L6Q3_9AGAR	A0A0D2L6Q3	HC	True	181		NA	1	0	p20[61:241]	734	No	No	Hypholoma sublateritium FD-334 SS-4	Basidiomycota	Eukaryota	Fungi	Basidiomycota	Agaricomycetes	Agaricales	Strophariaceae	Hypholoma	Hypholoma sublateritium	945553
tr|A0A0D2P7P9|A0A0D2P7P9_9AGAR	A0A0D2P7P9	HC	True	162		NA	1	0	p20[148:309]	802	No	No	Hypholoma sublateritium FD-334 SS-4	Basidiomycota	Eukaryota	Fungi	Basidiomycota	Agaricomycetes	Agaricales	Strophariaceae	Hypholoma	Hypholoma sublateritium	945553
tr|A0A0D2P0H2|A0A0D2P0H2_9AGAR	A0A0D2P0H2	HC	True	151		NA	1	0	p20[46:196]	801	No	No	Hypholoma sublateritium FD-334 SS-4	Basidiomycota	Eukaryota	Fungi	Basidiomycota	Agaricomycetes	Agaricales	Strophariaceae	Hypholoma	Hypholoma sublateritium	945553
tr|A0A0D2MGE3|A0A0D2MGE3_9AGAR	A0A0D2MGE3	HC	True	180		NA	1	0	p20[23:200]	705	No	No	Hypholoma sublateritium FD-334 SS-4	Basidiomycota	Eukaryota	Fungi	Basidiomycota	Agaricomycetes	Agaricales	Strophariaceae	Hypholoma	Hypholoma sublateritium	945553
tr|A0A0D2P548|A0A0D2P548_9AGAR	A0A0D2P548	HC	True	161		NA	1	0	p20[39:189]	699	No	No	Hypholoma sublateritium FD-334 SS-4	Basidiomycota	Eukaryota	Fungi	Basidiomycota	Agaricomycetes	Agaricales	Strophariaceae	Hypholoma	Hypholoma sublateritium	945553
tr|A0A0D2P288|A0A0D2P288_9AGAR	A0A0D2P288	HC	True	161		NA	1	0	p20[23:183]	728	No	No	Hypholoma sublateritium FD-334 SS-4	Basidiomycota	Eukaryota	Fungi	Basidiomycota	Agaricomycetes	Agaricales	Strophariaceae	Hypholoma	Hypholoma sublateritium	945553
tr|A0A0D2LJK4|A0A0D2LJK4_9AGAR	A0A0D2LJK4	HC	True	157		NA	1	0	p20[9:164]	647	No	No	Hypholoma sublateritium FD-334 SS-4	Basidiomycota	Eukaryota	Fungi	Basidiomycota	Agaricomycetes	Agaricales	Strophariaceae	Hypholoma	Hypholoma sublateritium	945553
tr|A0A0D2L5S4|A0A0D2L5S4_9AGAR	A0A0D2L5S4	HC	True	149		NA	1	0	p20[41:189]	734	No	No	Hypholoma sublateritium FD-334 SS-4	Basidiomycota	Eukaryota	Fungi	Basidiomycota	Agaricomycetes	Agaricales	Strophariaceae	Hypholoma	Hypholoma sublateritium	945553
tr|A0A0D2P1S2|A0A0D2P1S2_9AGAR	A0A0D2P1S2	HC	True	161		NA	1	0	p20[9:168]	678	No	No	Hypholoma sublateritium FD-334 SS-4	Basidiomycota	Eukaryota	Fungi	Basidiomycota	Agaricomycetes	Agaricales	Strophariaceae	Hypholoma	Hypholoma sublateritium	945553
tr|A0A0D2PR95|A0A0D2PR95_9AGAR	A0A0D2PR95	YS	Pseudo	142		NA	1	0	p20[48:189]	819	No	No	Hypholoma sublateritium FD-334 SS-4	Basidiomycota	Eukaryota	Fungi	Basidiomycota	Agaricomycetes	Agaricales	Strophariaceae	Hypholoma	Hypholoma sublateritium	945553
tr|A0A0D2KTK7|A0A0D2KTK7_9AGAR	A0A0D2KTK7	HC	True	126		NA	1	0	p20[82:207]	332	No	No	Hypholoma sublateritium FD-334 SS-4	Basidiomycota	Eukaryota	Fungi	Basidiomycota	Agaricomycetes	Agaricales	Strophariaceae	Hypholoma	Hypholoma sublateritium	945553
tr|A0A0D2MDT4|A0A0D2MDT4_9AGAR	A0A0D2MDT4	HC	True	179		NA	1	0	p20[50:223]	726	No	No	Hypholoma sublateritium FD-334 SS-4	Basidiomycota	Eukaryota	Fungi	Basidiomycota	Agaricomycetes	Agaricales	Strophariaceae	Hypholoma	Hypholoma sublateritium	945553
tr|A0A0D2PJK8|A0A0D2PJK8_9AGAR	A0A0D2PJK8	HC	True	138		NA	1	0	p20[230:360]	645	No	No	Hypholoma sublateritium FD-334 SS-4	Basidiomycota	Eukaryota	Fungi	Basidiomycota	Agaricomycetes	Agaricales	Strophariaceae	Hypholoma	Hypholoma sublateritium	945553
tr|A0A178D235|A0A178D235_9EURO	A0A178D235	HC	True	166		NA	1	0	p20[8:173]	673	No	No	Fonsecaea nubica	Ascomycota	Eukaryota	Fungi	Ascomycota	Eurotiomycetes	Chaetothyriales	Herpotrichiellaceae	Fonsecaea	Fonsecaea nubica	856822
tr|A0A0D2MGD5|A0A0D2MGD5_9AGAR	A0A0D2MGD5	HC	True	163		NA	1	0	p20[48:210]	704	No	No	Hypholoma sublateritium FD-334 SS-4	Basidiomycota	Eukaryota	Fungi	Basidiomycota	Agaricomycetes	Agaricales	Strophariaceae	Hypholoma	Hypholoma sublateritium	945553
tr|A0A0D2P267|A0A0D2P267_9AGAR	A0A0D2P267	HC	True	161		NA	1	0	p20[322:482]	584	No	No	Hypholoma sublateritium FD-334 SS-4	Basidiomycota	Eukaryota	Fungi	Basidiomycota	Agaricomycetes	Agaricales	Strophariaceae	Hypholoma	Hypholoma sublateritium	945553
tr|A0A0D2PE54|A0A0D2PE54_9AGAR	A0A0D2PE54	HC	True	141		NA	1	0	p20[135:273]	523	No	No	Hypholoma sublateritium FD-334 SS-4	Basidiomycota	Eukaryota	Fungi	Basidiomycota	Agaricomycetes	Agaricales	Strophariaceae	Hypholoma	Hypholoma sublateritium	945553
tr|A0A0D2KPK2|A0A0D2KPK2_9AGAR	A0A0D2KPK2	HC	True	160		NA	1	0	p20[224:383]	476	No	No	Hypholoma sublateritium FD-334 SS-4	Basidiomycota	Eukaryota	Fungi	Basidiomycota	Agaricomycetes	Agaricales	Strophariaceae	Hypholoma	Hypholoma sublateritium	945553
tr|A0A0D2PE12|A0A0D2PE12_9AGAR	A0A0D2PE12	HC	True	181		NA	1	0	p20[38:218]	458	No	No	Hypholoma sublateritium FD-334 SS-4	Basidiomycota	Eukaryota	Fungi	Basidiomycota	Agaricomycetes	Agaricales	Strophariaceae	Hypholoma	Hypholoma sublateritium	945553
tr|A0A0D2P2B4|A0A0D2P2B4_9AGAR	A0A0D2P2B4	HC	True	172		NA	1	0	p20[84:255]	757	No	No	Hypholoma sublateritium FD-334 SS-4	Basidiomycota	Eukaryota	Fungi	Basidiomycota	Agaricomycetes	Agaricales	Strophariaceae	Hypholoma	Hypholoma sublateritium	945553
tr|A0A0D2P141|A0A0D2P141_9AGAR	A0A0D2P141	HC	True	153		NA	1	0	p20[4:156]	159	No	No	Hypholoma sublateritium FD-334 SS-4	Basidiomycota	Eukaryota	Fungi	Basidiomycota	Agaricomycetes	Agaricales	Strophariaceae	Hypholoma	Hypholoma sublateritium	945553
tr|A0A0D2P894|A0A0D2P894_9AGAR	A0A0D2P894	HC	True	155		NA	1	0	p20[37:191]	685	No	No	Hypholoma sublateritium FD-334 SS-4	Basidiomycota	Eukaryota	Fungi	Basidiomycota	Agaricomycetes	Agaricales	Strophariaceae	Hypholoma	Hypholoma sublateritium	945553
tr|A0A0D2P8X1|A0A0D2P8X1_9AGAR	A0A0D2P8X1	HC	True	166		NA	1	0	p20[40:205]	730	No	No	Hypholoma sublateritium FD-334 SS-4	Basidiomycota	Eukaryota	Fungi	Basidiomycota	Agaricomycetes	Agaricales	Strophariaceae	Hypholoma	Hypholoma sublateritium	945553
tr|A0A0D2NIZ1|A0A0D2NIZ1_9AGAR	A0A0D2NIZ1	HC	True	160		NA	1	0	p20[125:284]	406	No	No	Hypholoma sublateritium FD-334 SS-4	Basidiomycota	Eukaryota	Fungi	Basidiomycota	Agaricomycetes	Agaricales	Strophariaceae	Hypholoma	Hypholoma sublateritium	945553
tr|A0A0D2NFR2|A0A0D2NFR2_9AGAR	A0A0D2NFR2	HC	True	179		NA	1	0	p20[34:212]	756	No	No	Hypholoma sublateritium FD-334 SS-4	Basidiomycota	Eukaryota	Fungi	Basidiomycota	Agaricomycetes	Agaricales	Strophariaceae	Hypholoma	Hypholoma sublateritium	945553
tr|A0A0D2MAM9|A0A0D2MAM9_9AGAR	A0A0D2MAM9	HC	True	157		NA	1	0	p20[83:230]	458	No	No	Hypholoma sublateritium FD-334 SS-4	Basidiomycota	Eukaryota	Fungi	Basidiomycota	Agaricomycetes	Agaricales	Strophariaceae	Hypholoma	Hypholoma sublateritium	945553
tr|A0A0D2NBL4|A0A0D2NBL4_9AGAR	A0A0D2NBL4	HC	True	174		NA	1	0	p20[368:538]	624	No	No	Hypholoma sublateritium FD-334 SS-4	Basidiomycota	Eukaryota	Fungi	Basidiomycota	Agaricomycetes	Agaricales	Strophariaceae	Hypholoma	Hypholoma sublateritium	945553
tr|A0A0D2DRP3|A0A0D2DRP3_9EURO	A0A0D2DRP3	HC	True	151		NA	1	0	p20[10:159]	664	No	No	Fonsecaea pedrosoi CBS 271.37	Ascomycota	Eukaryota	Fungi	Ascomycota	Eurotiomycetes	Chaetothyriales	Herpotrichiellaceae	Fonsecaea	Fonsecaea pedrosoi	1442368
tr|A0A0D2E275|A0A0D2E275_9EURO	A0A0D2E275	HC	True	162		NA	1	0	p20[5:166]	291	No	No	Fonsecaea pedrosoi CBS 271.37	Ascomycota	Eukaryota	Fungi	Ascomycota	Eurotiomycetes	Chaetothyriales	Herpotrichiellaceae	Fonsecaea	Fonsecaea pedrosoi	1442368
tr|A0A0D2DID8|A0A0D2DID8_9EURO	A0A0D2DID8	HC	True	166		NA	1	0	p20[8:173]	673	No	No	Fonsecaea pedrosoi CBS 271.37	Ascomycota	Eukaryota	Fungi	Ascomycota	Eurotiomycetes	Chaetothyriales	Herpotrichiellaceae	Fonsecaea	Fonsecaea pedrosoi	1442368
tr|A0A1V6Q7G8|A0A1V6Q7G8_9EURO	A0A1V6Q7G8	HC	True	167		NA	1	0	p20[9:175]	825	No	No	Penicillium solitum	Ascomycota	Eukaryota	Fungi	Ascomycota	Eurotiomycetes	Eurotiales	Aspergillaceae	Penicillium	Penicillium solitum	60172
tr|A0A1D2VN51|A0A1D2VN51_9ASCO	A0A1D2VN51	AD	Pseudo	156		NA	1	0	p20[26:181]	306	No	No	Ascoidea rubescens DSM 1968	Ascomycota	Eukaryota	Fungi	Ascomycota	Saccharomycetes	Saccharomycetales	Ascoideaceae	Ascoidea	Ascoidea rubescens	1344418
tr|W9HQN5|W9HQN5_FUSOX	W9HQN5	HC	True	158		NA	1	0	p20[10:167]	675	No	No	Fusarium oxysporum FOSC 3-a	Ascomycota	Eukaryota	Fungi	Ascomycota	Sordariomycetes	Hypocreales	Nectriaceae	Fusarium	Fusarium oxysporum	909455
tr|W9HLK6|W9HLK6_FUSOX	W9HLK6	HC	True	182		NA	1	0	p20[11:192]	242	No	No	Fusarium oxysporum FOSC 3-a	Ascomycota	Eukaryota	Fungi	Ascomycota	Sordariomycetes	Hypocreales	Nectriaceae	Fusarium	Fusarium oxysporum	909455
tr|A0A1D2VN73|A0A1D2VN73_9ASCO	A0A1D2VN73	KC	Pseudo	144		NA	1	0	p20[67:210]	323	No	No	Ascoidea rubescens DSM 1968	Ascomycota	Eukaryota	Fungi	Ascomycota	Saccharomycetes	Saccharomycetales	Ascoideaceae	Ascoidea	Ascoidea rubescens	1344418
tr|A0A1T3CXG1|A0A1T3CXG1_9HYPO	A0A1T3CXG1	HS	Pseudo	153		NA	1	0	p20[146:298]	440	No	No	Trichoderma guizhouense	Ascomycota	Eukaryota	Fungi	Ascomycota	Sordariomycetes	Hypocreales	Hypocreaceae	Trichoderma	Trichoderma guizhouense	1491466
tr|W9JAH8|W9JAH8_FUSOX	W9JAH8	HC	True	158		NA	1	0	p20[121:278]	367	No	No	Fusarium oxysporum FOSC 3-a	Ascomycota	Eukaryota	Fungi	Ascomycota	Sordariomycetes	Hypocreales	Nectriaceae	Fusarium	Fusarium oxysporum	909455
tr|A0A318Y9I7|A0A318Y9I7_9EURO	A0A318Y9I7	HC	True	143		NA	1	0	p20[16:158]	825	No	No	Aspergillus neoniger CBS 115656	Ascomycota	Eukaryota	Fungi	Ascomycota	Eurotiomycetes	Eurotiales	Aspergillaceae	Aspergillus	Aspergillus neoniger	1448310
tr|A0A0D6EI62|A0A0D6EI62_SPOSA	A0A0D6EI62	HC	True	140		NA	1	0	p20[1:138]	197	No	No	Sporidiobolus salmonicolor	Basidiomycota	Eukaryota	Fungi	Basidiomycota	Microbotryomycetes	Sporidiobolales	Sporidiobolaceae	Sporidiobolus	Sporidiobolus salmonicolor	5005
tr|C7Z380|C7Z380_NECH7	C7Z380	HC	True	183		NA	1	0	p20[10:190]	659	No	No	[Nectria] haematococca mpVI 77-13-4	Ascomycota	Eukaryota	Fungi	Ascomycota	Sordariomycetes	Hypocreales	Nectriaceae	Fusarium	[Nectria] haematococca	660122
tr|A0A194W8P2|A0A194W8P2_9PEZI	A0A194W8P2	HC	True	148		NA	1	0	p20[311:452]	967	No	No	Valsa mali	Ascomycota	Eukaryota	Fungi	Ascomycota	Sordariomycetes	Diaporthales	Valsaceae	Valsa	Valsa mali	105487
tr|C7ZMC9|C7ZMC9_NECH7	C7ZMC9	HC	True	157		NA	1	0	p20[10:166]	627	No	No	[Nectria] haematococca mpVI 77-13-4	Ascomycota	Eukaryota	Fungi	Ascomycota	Sordariomycetes	Hypocreales	Nectriaceae	Fusarium	[Nectria] haematococca	660122
tr|C7Z382|C7Z382_NECH7	C7Z382	HC	True	177		NA	1	0	p20[48:213]	723	No	No	[Nectria] haematococca mpVI 77-13-4	Ascomycota	Eukaryota	Fungi	Ascomycota	Sordariomycetes	Hypocreales	Nectriaceae	Fusarium	[Nectria] haematococca	660122
tr|A0A179FGM4|A0A179FGM4_METCM	A0A179FGM4	HC	True	154		NA	1	0	p20[5:157]	630	No	No	Pochonia chlamydosporia 170	Ascomycota	Eukaryota	Fungi	Ascomycota	Sordariomycetes	Hypocreales	Clavicipitaceae	Pochonia	Pochonia chlamydosporia	1380566
tr|C7YWZ0|C7YWZ0_NECH7	C7YWZ0	HC	True	153		NA	1	0	p20[92:243]	736	No	No	[Nectria] haematococca mpVI 77-13-4	Ascomycota	Eukaryota	Fungi	Ascomycota	Sordariomycetes	Hypocreales	Nectriaceae	Fusarium	[Nectria] haematococca	660122
tr|A0A2T4A4G5|A0A2T4A4G5_TRIHA	A0A2T4A4G5	HC	True	182		NA	1	0	p20[8:189]	732	No	No	Trichoderma harzianum CBS 226.95	Ascomycota	Eukaryota	Fungi	Ascomycota	Sordariomycetes	Hypocreales	Hypocreaceae	Trichoderma	Trichoderma harzianum	983964
tr|A0A2C5YZA7|A0A2C5YZA7_9HYPO	A0A2C5YZA7	HC	True	160		NA	1	0	p20[116:275]	345	No	No	Ophiocordyceps camponoti-rufipedis	Ascomycota	Eukaryota	Fungi	Ascomycota	Sordariomycetes	Hypocreales	Ophiocordycipitaceae	Ophiocordyceps	Ophiocordyceps camponoti-rufipedis	2004952
tr|A0A2T2NZV0|A0A2T2NZV0_CORCC	A0A2T2NZV0	HC	True	200		NA	1	0	p20[14:213]	709	No	No	Corynespora cassiicola Philippines	Ascomycota	Eukaryota	Fungi	Ascomycota	Dothideomycetes	Pleosporales	Corynesporascaceae	Corynespora	Corynespora cassiicola	1448308
tr|A0A074S6M3|A0A074S6M3_9HOMO	A0A074S6M3	HC	True	163		NA	1	0	p20[309:471]	976	No	No	Rhizoctonia solani 123E	Basidiomycota	Eukaryota	Fungi	Basidiomycota	Agaricomycetes	Cantharellales	Ceratobasidiaceae	Rhizoctonia	Rhizoctonia solani	1423351
tr|A0A074RPL8|A0A074RPL8_9HOMO	A0A074RPL8	HC	True	156		NA	1	0	p20[67:221]	747	No	No	Rhizoctonia solani 123E	Basidiomycota	Eukaryota	Fungi	Basidiomycota	Agaricomycetes	Cantharellales	Ceratobasidiaceae	Rhizoctonia	Rhizoctonia solani	1423351
tr|A0A074SQS4|A0A074SQS4_9HOMO	A0A074SQS4	HC	True	167		NA	1	0	p20[23:189]	698	No	No	Rhizoctonia solani 123E	Basidiomycota	Eukaryota	Fungi	Basidiomycota	Agaricomycetes	Cantharellales	Ceratobasidiaceae	Rhizoctonia	Rhizoctonia solani	1423351
tr|A0A074RU32|A0A074RU32_9HOMO	A0A074RU32	HC	True	159		NA	1	0	p20[25:183]	695	No	No	Rhizoctonia solani 123E	Basidiomycota	Eukaryota	Fungi	Basidiomycota	Agaricomycetes	Cantharellales	Ceratobasidiaceae	Rhizoctonia	Rhizoctonia solani	1423351
tr|A0A074S2R7|A0A074S2R7_9HOMO	A0A074S2R7	HC	True	193		NA	2	0	p20[21:213]-p20[699:851]	1371	No	No	Rhizoctonia solani 123E	Basidiomycota	Eukaryota	Fungi	Basidiomycota	Agaricomycetes	Cantharellales	Ceratobasidiaceae	Rhizoctonia	Rhizoctonia solani	1423351
tr|A0A074RTW4|A0A074RTW4_9HOMO	A0A074RTW4	HC	True	152		NA	2	0	p20[43:194]-p20[1366:1526]	2159	No	No	Rhizoctonia solani 123E	Basidiomycota	Eukaryota	Fungi	Basidiomycota	Agaricomycetes	Cantharellales	Ceratobasidiaceae	Rhizoctonia	Rhizoctonia solani	1423351
tr|A0A074RU28|A0A074RU28_9HOMO	A0A074RU28	HC	True	148		NA	1	0	p20[1201:1347]	1975	No	No	Rhizoctonia solani 123E	Basidiomycota	Eukaryota	Fungi	Basidiomycota	Agaricomycetes	Cantharellales	Ceratobasidiaceae	Rhizoctonia	Rhizoctonia solani	1423351
tr|A0A074RZX5|A0A074RZX5_9HOMO	A0A074RZX5	HC	True	153		NA	1	0	p20[157:309]	556	No	No	Rhizoctonia solani 123E	Basidiomycota	Eukaryota	Fungi	Basidiomycota	Agaricomycetes	Cantharellales	Ceratobasidiaceae	Rhizoctonia	Rhizoctonia solani	1423351
tr|A0A074RWA6|A0A074RWA6_9HOMO	A0A074RWA6	HC	True	132		NA	1	0	p20[52:180]	307	No	No	Rhizoctonia solani 123E	Basidiomycota	Eukaryota	Fungi	Basidiomycota	Agaricomycetes	Cantharellales	Ceratobasidiaceae	Rhizoctonia	Rhizoctonia solani	1423351
tr|A0A074S9G6|A0A074S9G6_9HOMO	A0A074S9G6	HC	True	165		NA	1	0	p20[20:184]	684	No	No	Rhizoctonia solani 123E	Basidiomycota	Eukaryota	Fungi	Basidiomycota	Agaricomycetes	Cantharellales	Ceratobasidiaceae	Rhizoctonia	Rhizoctonia solani	1423351
tr|A0A074S7H0|A0A074S7H0_9HOMO	A0A074S7H0	HS	Pseudo	161		NA	1	0	p20[20:180]	698	No	No	Rhizoctonia solani 123E	Basidiomycota	Eukaryota	Fungi	Basidiomycota	Agaricomycetes	Cantharellales	Ceratobasidiaceae	Rhizoctonia	Rhizoctonia solani	1423351
tr|A0A074SJM9|A0A074SJM9_9HOMO	A0A074SJM9	HC	True	164		NA	1	0	p20[178:341]	597	No	No	Rhizoctonia solani 123E	Basidiomycota	Eukaryota	Fungi	Basidiomycota	Agaricomycetes	Cantharellales	Ceratobasidiaceae	Rhizoctonia	Rhizoctonia solani	1423351
tr|A0A074RTK0|A0A074RTK0_9HOMO	A0A074RTK0	HC	True	135		NA	1	0	p20[140:274]	497	No	No	Rhizoctonia solani 123E	Basidiomycota	Eukaryota	Fungi	Basidiomycota	Agaricomycetes	Cantharellales	Ceratobasidiaceae	Rhizoctonia	Rhizoctonia solani	1423351
tr|A0A074RPS6|A0A074RPS6_9HOMO	A0A074RPS6	HC	True	161		NA	1	0	p20[30:189]	813	No	No	Rhizoctonia solani 123E	Basidiomycota	Eukaryota	Fungi	Basidiomycota	Agaricomycetes	Cantharellales	Ceratobasidiaceae	Rhizoctonia	Rhizoctonia solani	1423351
tr|A0A074RVD7|A0A074RVD7_9HOMO	A0A074RVD7	HC	True	173		NA	1	0	p20[56:228]	428	No	No	Rhizoctonia solani 123E	Basidiomycota	Eukaryota	Fungi	Basidiomycota	Agaricomycetes	Cantharellales	Ceratobasidiaceae	Rhizoctonia	Rhizoctonia solani	1423351
tr|A0A2R6S6N9|A0A2R6S6N9_9APHY	A0A2R6S6N9	HC	True	147		NA	1	0	p20[44:189]	314	No	No	Phlebia centrifuga	Basidiomycota	Eukaryota	Fungi	Basidiomycota	Agaricomycetes	Polyporales	Meruliaceae	Phlebia	Phlebia centrifuga	98765
tr|A0A2R6PG77|A0A2R6PG77_9APHY	A0A2R6PG77	HC	True	150		NA	1	0	p20[50:196]	698	No	No	Phlebia centrifuga	Basidiomycota	Eukaryota	Fungi	Basidiomycota	Agaricomycetes	Polyporales	Meruliaceae	Phlebia	Phlebia centrifuga	98765
tr|A0A2R6S6N1|A0A2R6S6N1_9APHY	A0A2R6S6N1	HC	True	159		NA	1	0	p20[110:268]	705	No	No	Phlebia centrifuga	Basidiomycota	Eukaryota	Fungi	Basidiomycota	Agaricomycetes	Polyporales	Meruliaceae	Phlebia	Phlebia centrifuga	98765
tr|A0A2R6PG75|A0A2R6PG75_9APHY	A0A2R6PG75	HC	True	156		NA	1	0	p20[28:183]	706	No	No	Phlebia centrifuga	Basidiomycota	Eukaryota	Fungi	Basidiomycota	Agaricomycetes	Polyporales	Meruliaceae	Phlebia	Phlebia centrifuga	98765
tr|A0A2R6NUE4|A0A2R6NUE4_9APHY	A0A2R6NUE4	HC	True	152		NA	1	0	p20[7:157]	651	No	No	Phlebia centrifuga	Basidiomycota	Eukaryota	Fungi	Basidiomycota	Agaricomycetes	Polyporales	Meruliaceae	Phlebia	Phlebia centrifuga	98765
tr|A0A2R6S5B6|A0A2R6S5B6_9APHY	A0A2R6S5B6	HC	True	140		NA	1	0	p20[7:146]	150	No	No	Phlebia centrifuga	Basidiomycota	Eukaryota	Fungi	Basidiomycota	Agaricomycetes	Polyporales	Meruliaceae	Phlebia	Phlebia centrifuga	98765
tr|A0A2R6Q5J3|A0A2R6Q5J3_9APHY	A0A2R6Q5J3	HC	True	161		NA	1	0	p20[24:184]	226	No	No	Phlebia centrifuga	Basidiomycota	Eukaryota	Fungi	Basidiomycota	Agaricomycetes	Polyporales	Meruliaceae	Phlebia	Phlebia centrifuga	98765
tr|A0A2R6NK03|A0A2R6NK03_9APHY	A0A2R6NK03	HC	True	169		NA	1	0	p20[6:168]	688	No	No	Phlebia centrifuga	Basidiomycota	Eukaryota	Fungi	Basidiomycota	Agaricomycetes	Polyporales	Meruliaceae	Phlebia	Phlebia centrifuga	98765
tr|A0A2R6PG79|A0A2R6PG79_9APHY	A0A2R6PG79	HC	True	152		NA	1	0	p20[406:557]	1040	No	No	Phlebia centrifuga	Basidiomycota	Eukaryota	Fungi	Basidiomycota	Agaricomycetes	Polyporales	Meruliaceae	Phlebia	Phlebia centrifuga	98765
tr|A0A2R6NJV8|A0A2R6NJV8_9APHY	A0A2R6NJV8	HC	True	148		NA	1	0	p20[6:150]	245	No	No	Phlebia centrifuga	Basidiomycota	Eukaryota	Fungi	Basidiomycota	Agaricomycetes	Polyporales	Meruliaceae	Phlebia	Phlebia centrifuga	98765
tr|A0A2R6PG74|A0A2R6PG74_9APHY	A0A2R6PG74	HC	True	164		NA	1	0	p20[59:222]	715	No	No	Phlebia centrifuga	Basidiomycota	Eukaryota	Fungi	Basidiomycota	Agaricomycetes	Polyporales	Meruliaceae	Phlebia	Phlebia centrifuga	98765
tr|A0A2R6NK52|A0A2R6NK52_9APHY	A0A2R6NK52	HC	True	163		NA	1	0	p20[6:168]	689	No	No	Phlebia centrifuga	Basidiomycota	Eukaryota	Fungi	Basidiomycota	Agaricomycetes	Polyporales	Meruliaceae	Phlebia	Phlebia centrifuga	98765
tr|V2XL71|V2XL71_MONRO	V2XL71	HC	True	149		NA	1	0	p20[353:501]	521	No	No	Moniliophthora roreri MCA 2997	Basidiomycota	Eukaryota	Fungi	Basidiomycota	Agaricomycetes	Agaricales	Marasmiaceae	Moniliophthora	Moniliophthora roreri	1381753
tr|V2X5D3|V2X5D3_MONRO	V2X5D3	HC	True	184		NA	1	0	p20[100:283]	529	No	No	Moniliophthora roreri MCA 2997	Basidiomycota	Eukaryota	Fungi	Basidiomycota	Agaricomycetes	Agaricales	Marasmiaceae	Moniliophthora	Moniliophthora roreri	1381753
tr|V2XBV6|V2XBV6_MONRO	V2XBV6	HC	True	150		NA	1	0	p20[55:204]	499	No	No	Moniliophthora roreri MCA 2997	Basidiomycota	Eukaryota	Fungi	Basidiomycota	Agaricomycetes	Agaricales	Marasmiaceae	Moniliophthora	Moniliophthora roreri	1381753
tr|V2WWQ9|V2WWQ9_MONRO	V2WWQ9	CC	Pseudo	171		NA	1	0	p20[432:590]	722	No	No	Moniliophthora roreri MCA 2997	Basidiomycota	Eukaryota	Fungi	Basidiomycota	Agaricomycetes	Agaricales	Marasmiaceae	Moniliophthora	Moniliophthora roreri	1381753
tr|V2XAQ9|V2XAQ9_MONRO	V2XAQ9	FC	Pseudo	143		NA	1	0	p20[444:586]	852	No	No	Moniliophthora roreri MCA 2997	Basidiomycota	Eukaryota	Fungi	Basidiomycota	Agaricomycetes	Agaricales	Marasmiaceae	Moniliophthora	Moniliophthora roreri	1381753
tr|A0A1Y2HSJ9|A0A1Y2HSJ9_9FUNG	A0A1Y2HSJ9	HC	True	173		NA	1	0	p20[5:163]	355	No	No	Catenaria anguillulae PL171	Blastocladiomycota	Eukaryota	Fungi	Blastocladiomycota	Blastocladiomycetes	Blastocladiales	Catenariaceae	Catenaria	Catenaria anguillulae	765915
tr|A0A1Y2HDU7|A0A1Y2HDU7_9FUNG	A0A1Y2HDU7	HC	True	137		NA	1	0	p20[7:143]	293	No	No	Catenaria anguillulae PL171	Blastocladiomycota	Eukaryota	Fungi	Blastocladiomycota	Blastocladiomycetes	Blastocladiales	Catenariaceae	Catenaria	Catenaria anguillulae	765915
tr|A0A1Y2HFV2|A0A1Y2HFV2_9FUNG	A0A1Y2HFV2	HC	True	141		NA	1	0	p20[11:151]	224	No	No	Catenaria anguillulae PL171	Blastocladiomycota	Eukaryota	Fungi	Blastocladiomycota	Blastocladiomycetes	Blastocladiales	Catenariaceae	Catenaria	Catenaria anguillulae	765915
tr|A0A1Y2H4W3|A0A1Y2H4W3_9FUNG	A0A1Y2H4W3	HC	True	149		NA	1	0	p20[5:145]	304	No	No	Catenaria anguillulae PL171	Blastocladiomycota	Eukaryota	Fungi	Blastocladiomycota	Blastocladiomycetes	Blastocladiales	Catenariaceae	Catenaria	Catenaria anguillulae	765915
tr|A0A1V6TJT9|A0A1V6TJT9_9EURO	A0A1V6TJT9	HC	True	157		NA	1	0	p20[5:160]	644	No	No	Penicillium steckii	Ascomycota	Eukaryota	Fungi	Ascomycota	Eurotiomycetes	Eurotiales	Aspergillaceae	Penicillium	Penicillium steckii	303698
tr|A0A2P4ZSL0|A0A2P4ZSL0_9HYPO	A0A2P4ZSL0	HC	True	186		NA	1	0	p20[4:189]	680	No	No	Trichoderma gamsii	Ascomycota	Eukaryota	Fungi	Ascomycota	Sordariomycetes	Hypocreales	Hypocreaceae	Trichoderma	Trichoderma gamsii	398673
tr|A0A2K0TA94|A0A2K0TA94_9HYPO	A0A2K0TA94	HC	True	172		NA	1	0	p20[4:175]	680	No	No	Trichoderma gamsii	Ascomycota	Eukaryota	Fungi	Ascomycota	Sordariomycetes	Hypocreales	Hypocreaceae	Trichoderma	Trichoderma gamsii	398673
tr|A0A2K0TFQ2|A0A2K0TFQ2_9HYPO	A0A2K0TFQ2	HC	True	187		NA	1	0	p20[12:186]	681	No	No	Trichoderma gamsii	Ascomycota	Eukaryota	Fungi	Ascomycota	Sordariomycetes	Hypocreales	Hypocreaceae	Trichoderma	Trichoderma gamsii	398673
tr|A0A1Y2AQ67|A0A1Y2AQ67_9FUNG	A0A1Y2AQ67	HC	True	163		NA	1	0	p20[157:319]	397	No	No	Neocallimastix californiae	Chytridiomycota	Eukaryota	Fungi	Chytridiomycota	Neocallimastigomycetes	Neocallimastigales	Neocallimastigaceae	Neocallimastix	Neocallimastix californiae	1754190
tr|A0A1S8BI07|A0A1S8BI07_9PEZI	A0A1S8BI07	HC	True	137		NA	1	0	p20[28:157]	670	No	No	Diplodia seriata	Ascomycota	Eukaryota	Fungi	Ascomycota	Dothideomycetes	Botryosphaeriales	Botryosphaeriaceae	Diplodia	Diplodia seriata	420778
tr|A0A2N6NSG6|A0A2N6NSG6_BEABA	A0A2N6NSG6	HC	True	165		NA	1	0	p20[12:175]	678	No	No	Beauveria bassiana	Ascomycota	Eukaryota	Fungi	Ascomycota	Sordariomycetes	Hypocreales	Cordycipitaceae	Beauveria	Beauveria bassiana	176275
tr|A0A165DBA3|A0A165DBA3_9APHY	A0A165DBA3	HC	True	200		NA	1	0	p20[11:210]	335	No	No	Laetiporus sulphureus 93-53	Basidiomycota	Eukaryota	Fungi	Basidiomycota	Agaricomycetes	Polyporales	Laetiporaceae	Laetiporus	Laetiporus sulphureus	1314785
tr|A0A165BFI5|A0A165BFI5_9APHY	A0A165BFI5	HC	True	159		NA	1	0	p20[27:185]	317	No	No	Laetiporus sulphureus 93-53	Basidiomycota	Eukaryota	Fungi	Basidiomycota	Agaricomycetes	Polyporales	Laetiporaceae	Laetiporus	Laetiporus sulphureus	1314785
tr|A0A165C5L3|A0A165C5L3_9APHY	A0A165C5L3	LC	Pseudo	161		NA	1	0	p20[40:200]	338	No	No	Laetiporus sulphureus 93-53	Basidiomycota	Eukaryota	Fungi	Basidiomycota	Agaricomycetes	Polyporales	Laetiporaceae	Laetiporus	Laetiporus sulphureus	1314785
tr|A0A165DB75|A0A165DB75_9APHY	A0A165DB75	HC	True	166		NA	1	0	p20[31:196]	317	No	No	Laetiporus sulphureus 93-53	Basidiomycota	Eukaryota	Fungi	Basidiomycota	Agaricomycetes	Polyporales	Laetiporaceae	Laetiporus	Laetiporus sulphureus	1314785
tr|A0A165BFD4|A0A165BFD4_9APHY	A0A165BFD4	HC	True	147		NA	1	0	p20[232:377]	506	No	No	Laetiporus sulphureus 93-53	Basidiomycota	Eukaryota	Fungi	Basidiomycota	Agaricomycetes	Polyporales	Laetiporaceae	Laetiporus	Laetiporus sulphureus	1314785
tr|A0A165DBB2|A0A165DBB2_9APHY	A0A165DBB2	HC	True	128		NA	1	0	p20[7:131]	265	No	No	Laetiporus sulphureus 93-53	Basidiomycota	Eukaryota	Fungi	Basidiomycota	Agaricomycetes	Polyporales	Laetiporaceae	Laetiporus	Laetiporus sulphureus	1314785
tr|A0A165DFW4|A0A165DFW4_9APHY	A0A165DFW4	HC	True	158		NA	1	0	p20[4:161]	333	No	No	Laetiporus sulphureus 93-53	Basidiomycota	Eukaryota	Fungi	Basidiomycota	Agaricomycetes	Polyporales	Laetiporaceae	Laetiporus	Laetiporus sulphureus	1314785
tr|A0A165BFC3|A0A165BFC3_9APHY	A0A165BFC3	HC	True	153		NA	1	0	p20[83:234]	361	No	No	Laetiporus sulphureus 93-53	Basidiomycota	Eukaryota	Fungi	Basidiomycota	Agaricomycetes	Polyporales	Laetiporaceae	Laetiporus	Laetiporus sulphureus	1314785
tr|A0A165C5L9|A0A165C5L9_9APHY	A0A165C5L9	HC	True	153		NA	1	0	p20[164:314]	442	No	No	Laetiporus sulphureus 93-53	Basidiomycota	Eukaryota	Fungi	Basidiomycota	Agaricomycetes	Polyporales	Laetiporaceae	Laetiporus	Laetiporus sulphureus	1314785
tr|A0A165EHS8|A0A165EHS8_9APHY	A0A165EHS8	HC	True	166		NA	1	0	p20[18:176]	441	No	No	Laetiporus sulphureus 93-53	Basidiomycota	Eukaryota	Fungi	Basidiomycota	Agaricomycetes	Polyporales	Laetiporaceae	Laetiporus	Laetiporus sulphureus	1314785
tr|A0A165C5K7|A0A165C5K7_9APHY	A0A165C5K7	HC	True	155		NA	1	0	p20[169:322]	439	No	No	Laetiporus sulphureus 93-53	Basidiomycota	Eukaryota	Fungi	Basidiomycota	Agaricomycetes	Polyporales	Laetiporaceae	Laetiporus	Laetiporus sulphureus	1314785
tr|A0A165CXT3|A0A165CXT3_9APHY	A0A165CXT3	HC	True	163		NA	1	0	p20[2:164]	658	No	No	Laetiporus sulphureus 93-53	Basidiomycota	Eukaryota	Fungi	Basidiomycota	Agaricomycetes	Polyporales	Laetiporaceae	Laetiporus	Laetiporus sulphureus	1314785
tr|A0A165DQW9|A0A165DQW9_9APHY	A0A165DQW9	HC	True	174		NA	1	0	p20[210:373]	893	No	No	Laetiporus sulphureus 93-53	Basidiomycota	Eukaryota	Fungi	Basidiomycota	Agaricomycetes	Polyporales	Laetiporaceae	Laetiporus	Laetiporus sulphureus	1314785
tr|A0A165D465|A0A165D465_9APHY	A0A165D465	HC	True	143		NA	1	0	p20[1:143]	146	No	No	Laetiporus sulphureus 93-53	Basidiomycota	Eukaryota	Fungi	Basidiomycota	Agaricomycetes	Polyporales	Laetiporaceae	Laetiporus	Laetiporus sulphureus	1314785
tr|A0A165DG03|A0A165DG03_9APHY	A0A165DG03	HC	True	154		NA	1	0	p20[5:158]	248	No	No	Laetiporus sulphureus 93-53	Basidiomycota	Eukaryota	Fungi	Basidiomycota	Agaricomycetes	Polyporales	Laetiporaceae	Laetiporus	Laetiporus sulphureus	1314785
tr|A0A165CXS4|A0A165CXS4_9APHY	A0A165CXS4	HC	True	148		NA	1	0	p20[4:151]	156	No	No	Laetiporus sulphureus 93-53	Basidiomycota	Eukaryota	Fungi	Basidiomycota	Agaricomycetes	Polyporales	Laetiporaceae	Laetiporus	Laetiporus sulphureus	1314785
tr|A0A165DVH6|A0A165DVH6_9APHY	A0A165DVH6	HC	True	147		NA	1	0	p20[1:147]	153	No	No	Laetiporus sulphureus 93-53	Basidiomycota	Eukaryota	Fungi	Basidiomycota	Agaricomycetes	Polyporales	Laetiporaceae	Laetiporus	Laetiporus sulphureus	1314785
tr|A0A165CXR1|A0A165CXR1_9APHY	A0A165CXR1	HC	True	175		NA	1	0	p20[138:298]	803	No	No	Laetiporus sulphureus 93-53	Basidiomycota	Eukaryota	Fungi	Basidiomycota	Agaricomycetes	Polyporales	Laetiporaceae	Laetiporus	Laetiporus sulphureus	1314785
tr|A0A165EFP4|A0A165EFP4_9APHY	A0A165EFP4	HC	True	130		NA	1	0	p20[3:132]	133	No	No	Laetiporus sulphureus 93-53	Basidiomycota	Eukaryota	Fungi	Basidiomycota	Agaricomycetes	Polyporales	Laetiporaceae	Laetiporus	Laetiporus sulphureus	1314785
tr|A0A165FAJ6|A0A165FAJ6_9APHY	A0A165FAJ6	RS	Pseudo	145		NA	1	0	p20[22:166]	237	No	No	Laetiporus sulphureus 93-53	Basidiomycota	Eukaryota	Fungi	Basidiomycota	Agaricomycetes	Polyporales	Laetiporaceae	Laetiporus	Laetiporus sulphureus	1314785
tr|A0A165DR15|A0A165DR15_9APHY	A0A165DR15	HC	True	146		NA	1	0	p20[53:198]	737	No	No	Laetiporus sulphureus 93-53	Basidiomycota	Eukaryota	Fungi	Basidiomycota	Agaricomycetes	Polyporales	Laetiporaceae	Laetiporus	Laetiporus sulphureus	1314785
tr|A0A165EHR5|A0A165EHR5_9APHY	A0A165EHR5	HC	True	186		NA	1	0	p20[19:204]	590	No	No	Laetiporus sulphureus 93-53	Basidiomycota	Eukaryota	Fungi	Basidiomycota	Agaricomycetes	Polyporales	Laetiporaceae	Laetiporus	Laetiporus sulphureus	1314785
tr|A0A165GRQ8|A0A165GRQ8_9APHY	A0A165GRQ8	HC	True	148		NA	1	0	p20[31:178]	677	No	No	Laetiporus sulphureus 93-53	Basidiomycota	Eukaryota	Fungi	Basidiomycota	Agaricomycetes	Polyporales	Laetiporaceae	Laetiporus	Laetiporus sulphureus	1314785
tr|A0A165CJK3|A0A165CJK3_9APHY	A0A165CJK3	HC	True	141		NA	1	0	p20[8:148]	154	No	No	Laetiporus sulphureus 93-53	Basidiomycota	Eukaryota	Fungi	Basidiomycota	Agaricomycetes	Polyporales	Laetiporaceae	Laetiporus	Laetiporus sulphureus	1314785
tr|A0A2G8RPN3|A0A2G8RPN3_9APHY	A0A2G8RPN3	HC	True	170		NA	1	0	p20[15:177]	350	No	No	Ganoderma sinense ZZ0214-1	Basidiomycota	Eukaryota	Fungi	Basidiomycota	Agaricomycetes	Polyporales	Polyporaceae	Ganoderma	Ganoderma sinense	1077348
tr|A0A0C9XI95|A0A0C9XI95_9AGAR	A0A0C9XI95	HC	True	165		NA	1	0	p20[53:214]	703	No	No	Laccaria amethystina LaAM-08-1	Basidiomycota	Eukaryota	Fungi	Basidiomycota	Agaricomycetes	Agaricales	Tricholomataceae	Laccaria	Laccaria amethystina	1095629
tr|A0A0C9YQ70|A0A0C9YQ70_9AGAR	A0A0C9YQ70	HC	True	145		NA	1	0	p20[154:298]	786	No	No	Laccaria amethystina LaAM-08-1	Basidiomycota	Eukaryota	Fungi	Basidiomycota	Agaricomycetes	Agaricales	Tricholomataceae	Laccaria	Laccaria amethystina	1095629
tr|A0A0C9XD55|A0A0C9XD55_9AGAR	A0A0C9XD55	HC	True	150		NA	1	0	p20[55:195]	652	No	No	Laccaria amethystina LaAM-08-1	Basidiomycota	Eukaryota	Fungi	Basidiomycota	Agaricomycetes	Agaricales	Tricholomataceae	Laccaria	Laccaria amethystina	1095629
tr|A0A0C9WZ64|A0A0C9WZ64_9AGAR	A0A0C9WZ64	HC	True	182		NA	1	0	p20[53:234]	706	No	No	Laccaria amethystina LaAM-08-1	Basidiomycota	Eukaryota	Fungi	Basidiomycota	Agaricomycetes	Agaricales	Tricholomataceae	Laccaria	Laccaria amethystina	1095629
tr|A0A2G8RPM0|A0A2G8RPM0_9APHY	A0A2G8RPM0	HC	True	177		NA	1	0	p20[8:184]	340	No	No	Ganoderma sinense ZZ0214-1	Basidiomycota	Eukaryota	Fungi	Basidiomycota	Agaricomycetes	Polyporales	Polyporaceae	Ganoderma	Ganoderma sinense	1077348
tr|A0A0C9YGH0|A0A0C9YGH0_9AGAR	A0A0C9YGH0	HC	True	156		NA	1	0	p20[11:157]	748	No	No	Laccaria amethystina LaAM-08-1	Basidiomycota	Eukaryota	Fungi	Basidiomycota	Agaricomycetes	Agaricales	Tricholomataceae	Laccaria	Laccaria amethystina	1095629
tr|A0A0C9WVS3|A0A0C9WVS3_9AGAR	A0A0C9WVS3	HC	True	165		NA	1	0	p20[53:210]	703	No	No	Laccaria amethystina LaAM-08-1	Basidiomycota	Eukaryota	Fungi	Basidiomycota	Agaricomycetes	Agaricales	Tricholomataceae	Laccaria	Laccaria amethystina	1095629
tr|A0A0C9WUC0|A0A0C9WUC0_9AGAR	A0A0C9WUC0	HC	True	164		NA	1	0	p20[47:210]	314	No	No	Laccaria amethystina LaAM-08-1	Basidiomycota	Eukaryota	Fungi	Basidiomycota	Agaricomycetes	Agaricales	Tricholomataceae	Laccaria	Laccaria amethystina	1095629
tr|L8WQJ9|L8WQJ9_THACA	L8WQJ9	HC	True	155		NA	2	0	p20[93:247]-p20[1411:1542]	2338	No	No	Rhizoctonia solani AG-1 IA	Basidiomycota	Eukaryota	Fungi	Basidiomycota	Agaricomycetes	Cantharellales	Ceratobasidiaceae	Rhizoctonia	Rhizoctonia solani	983506
tr|L2G533|L2G533_COLGN	L2G533	HC	True	163		NA	1	0	p20[9:171]	2206	No	No	Colletotrichum gloeosporioides Nara gc5	Ascomycota	Eukaryota	Fungi	Ascomycota	Sordariomycetes	Glomerellales	Glomerellaceae	Colletotrichum	Colletotrichum gloeosporioides	1213859
tr|L8WL54|L8WL54_THACA	L8WL54	HC	True	153		NA	1	0	p20[920:1072]	1712	No	No	Rhizoctonia solani AG-1 IA	Basidiomycota	Eukaryota	Fungi	Basidiomycota	Agaricomycetes	Cantharellales	Ceratobasidiaceae	Rhizoctonia	Rhizoctonia solani	983506
tr|L8WXT5|L8WXT5_THACA	L8WXT5	HC	True	164		NA	1	0	p20[74:236]	734	No	No	Rhizoctonia solani AG-1 IA	Basidiomycota	Eukaryota	Fungi	Basidiomycota	Agaricomycetes	Cantharellales	Ceratobasidiaceae	Rhizoctonia	Rhizoctonia solani	983506
tr|L2FKC7|L2FKC7_COLGN	L2FKC7	HC	True	158		NA	1	0	p20[7:157]	570	No	No	Colletotrichum gloeosporioides Nara gc5	Ascomycota	Eukaryota	Fungi	Ascomycota	Sordariomycetes	Glomerellales	Glomerellaceae	Colletotrichum	Colletotrichum gloeosporioides	1213859
tr|M2QJE8|M2QJE8_CERS8	M2QJE8	HC	True	120		NA	1	0	p20[59:174]	424	No	No	Gelatoporia subvermispora B	Basidiomycota	Eukaryota	Fungi	Basidiomycota	Agaricomycetes	Polyporales	Gelatoporiaceae	Gelatoporia	Gelatoporia subvermispora	914234
tr|L8WM69|L8WM69_THACA	L8WM69	HC	True	161		NA	1	0	p20[81:241]	937	No	No	Rhizoctonia solani AG-1 IA	Basidiomycota	Eukaryota	Fungi	Basidiomycota	Agaricomycetes	Cantharellales	Ceratobasidiaceae	Rhizoctonia	Rhizoctonia solani	983506
tr|A0A0C9XDE6|A0A0C9XDE6_9AGAR	A0A0C9XDE6	HC	True	165		NA	1	0	p20[78:239]	727	No	No	Laccaria amethystina LaAM-08-1	Basidiomycota	Eukaryota	Fungi	Basidiomycota	Agaricomycetes	Agaricales	Tricholomataceae	Laccaria	Laccaria amethystina	1095629
tr|L8X1Q4|L8X1Q4_THACA	L8X1Q4	KC	Pseudo	185		NA	1	0	p20[18:202]	1133	No	No	Rhizoctonia solani AG-1 IA	Basidiomycota	Eukaryota	Fungi	Basidiomycota	Agaricomycetes	Cantharellales	Ceratobasidiaceae	Rhizoctonia	Rhizoctonia solani	983506
tr|A0A0C9XQ77|A0A0C9XQ77_9AGAR	A0A0C9XQ77	HC	True	174		NA	1	0	p20[599:772]	1052	No	No	Laccaria amethystina LaAM-08-1	Basidiomycota	Eukaryota	Fungi	Basidiomycota	Agaricomycetes	Agaricales	Tricholomataceae	Laccaria	Laccaria amethystina	1095629
tr|M2PLP4|M2PLP4_CERS8	M2PLP4	HC	True	152		NA	1	0	p20[7:158]	668	No	No	Gelatoporia subvermispora B	Basidiomycota	Eukaryota	Fungi	Basidiomycota	Agaricomycetes	Polyporales	Gelatoporiaceae	Gelatoporia	Gelatoporia subvermispora	914234
tr|A0A2G8SQ30|A0A2G8SQ30_9APHY	A0A2G8SQ30	HC	True	149		NA	1	0	p20[7:155]	600	No	No	Ganoderma sinense ZZ0214-1	Basidiomycota	Eukaryota	Fungi	Basidiomycota	Agaricomycetes	Polyporales	Polyporaceae	Ganoderma	Ganoderma sinense	1077348
tr|A0A2G8RNW6|A0A2G8RNW6_9APHY	A0A2G8RNW6	HC	True	166		NA	1	0	p20[36:198]	466	No	No	Ganoderma sinense ZZ0214-1	Basidiomycota	Eukaryota	Fungi	Basidiomycota	Agaricomycetes	Polyporales	Polyporaceae	Ganoderma	Ganoderma sinense	1077348
tr|M2QJE3|M2QJE3_CERS8	M2QJE3	HC	True	188		NA	1	0	p20[14:197]	379	No	No	Gelatoporia subvermispora B	Basidiomycota	Eukaryota	Fungi	Basidiomycota	Agaricomycetes	Polyporales	Gelatoporiaceae	Gelatoporia	Gelatoporia subvermispora	914234
tr|A0A022Y275|A0A022Y275_TRISD	A0A022Y275	HC	True	154		NA	1	0	p20[154:306]	315	No	No	Trichophyton soudanense CBS 452.61	Ascomycota	Eukaryota	Fungi	Ascomycota	Eurotiomycetes	Onygenales	Arthrodermataceae	Trichophyton	Trichophyton soudanense	1215331
tr|A0A2G8RPP2|A0A2G8RPP2_9APHY	A0A2G8RPP2	HC	True	178		NA	1	0	p20[8:185]	306	No	No	Ganoderma sinense ZZ0214-1	Basidiomycota	Eukaryota	Fungi	Basidiomycota	Agaricomycetes	Polyporales	Polyporaceae	Ganoderma	Ganoderma sinense	1077348
tr|L8WFD3|L8WFD3_THACA	L8WFD3	HC	True	155		NA	1	0	p20[349:503]	700	No	No	Rhizoctonia solani AG-1 IA	Basidiomycota	Eukaryota	Fungi	Basidiomycota	Agaricomycetes	Cantharellales	Ceratobasidiaceae	Rhizoctonia	Rhizoctonia solani	983506
tr|L2FS59|L2FS59_COLGN	L2FS59	HC	True	162		NA	1	0	p20[11:161]	648	No	No	Colletotrichum gloeosporioides Nara gc5	Ascomycota	Eukaryota	Fungi	Ascomycota	Sordariomycetes	Glomerellales	Glomerellaceae	Colletotrichum	Colletotrichum gloeosporioides	1213859
tr|L8X1C3|L8X1C3_THACA	L8X1C3	HC	True	156		NA	1	0	p20[60:215]	723	No	No	Rhizoctonia solani AG-1 IA	Basidiomycota	Eukaryota	Fungi	Basidiomycota	Agaricomycetes	Cantharellales	Ceratobasidiaceae	Rhizoctonia	Rhizoctonia solani	983506
tr|M2R3E7|M2R3E7_CERS8	M2R3E7	HC	True	191		NA	1	0	p20[7:197]	328	No	No	Gelatoporia subvermispora B	Basidiomycota	Eukaryota	Fungi	Basidiomycota	Agaricomycetes	Polyporales	Gelatoporiaceae	Gelatoporia	Gelatoporia subvermispora	914234
tr|A0A0C9WP79|A0A0C9WP79_9AGAR	A0A0C9WP79	HC	True	181		NA	1	0	p20[35:215]	690	No	No	Laccaria amethystina LaAM-08-1	Basidiomycota	Eukaryota	Fungi	Basidiomycota	Agaricomycetes	Agaricales	Tricholomataceae	Laccaria	Laccaria amethystina	1095629
tr|M2PA46|M2PA46_CERS8	M2PA46	HC	True	177		NA	1	0	p20[133:307]	370	No	No	Gelatoporia subvermispora B	Basidiomycota	Eukaryota	Fungi	Basidiomycota	Agaricomycetes	Polyporales	Gelatoporiaceae	Gelatoporia	Gelatoporia subvermispora	914234
tr|A0A0C9XIG5|A0A0C9XIG5_9AGAR	A0A0C9XIG5	HC	True	165		NA	1	0	p20[45:209]	694	No	No	Laccaria amethystina LaAM-08-1	Basidiomycota	Eukaryota	Fungi	Basidiomycota	Agaricomycetes	Agaricales	Tricholomataceae	Laccaria	Laccaria amethystina	1095629
tr|M2P733|M2P733_CERS8	M2P733	HC	True	168		NA	1	0	p20[334:501]	646	No	No	Gelatoporia subvermispora B	Basidiomycota	Eukaryota	Fungi	Basidiomycota	Agaricomycetes	Polyporales	Gelatoporiaceae	Gelatoporia	Gelatoporia subvermispora	914234
tr|A0A2H3HSK0|A0A2H3HSK0_GIBZA	A0A2H3HSK0	HC	True	189		NA	1	0	p20[8:194]	704	No	No	Fusarium graminearum	Ascomycota	Eukaryota	Fungi	Ascomycota	Sordariomycetes	Hypocreales	Nectriaceae	Fusarium	Fusarium graminearum	5518
tr|A0A2H3HCC6|A0A2H3HCC6_GIBZA	A0A2H3HCC6	HC	True	140		NA	1	0	p20[230:366]	694	No	No	Fusarium graminearum	Ascomycota	Eukaryota	Fungi	Ascomycota	Sordariomycetes	Hypocreales	Nectriaceae	Fusarium	Fusarium graminearum	5518
tr|L8WY19|L8WY19_THACA	L8WY19	HC	True	188		NA	1	0	p20[104:291]	767	No	No	Rhizoctonia solani AG-1 IA	Basidiomycota	Eukaryota	Fungi	Basidiomycota	Agaricomycetes	Cantharellales	Ceratobasidiaceae	Rhizoctonia	Rhizoctonia solani	983506
tr|M2R048|M2R048_CERS8	M2R048	HC	True	182		NA	1	0	p20[21:202]	412	No	No	Gelatoporia subvermispora B	Basidiomycota	Eukaryota	Fungi	Basidiomycota	Agaricomycetes	Polyporales	Gelatoporiaceae	Gelatoporia	Gelatoporia subvermispora	914234
tr|M2R9T2|M2R9T2_CERS8	M2R9T2	HC	True	187		NA	1	0	p20[7:193]	283	No	No	Gelatoporia subvermispora B	Basidiomycota	Eukaryota	Fungi	Basidiomycota	Agaricomycetes	Polyporales	Gelatoporiaceae	Gelatoporia	Gelatoporia subvermispora	914234
tr|A0A0C9XIK2|A0A0C9XIK2_9AGAR	A0A0C9XIK2	HC	True	163		NA	1	0	p20[81:243]	723	No	No	Laccaria amethystina LaAM-08-1	Basidiomycota	Eukaryota	Fungi	Basidiomycota	Agaricomycetes	Agaricales	Tricholomataceae	Laccaria	Laccaria amethystina	1095629
tr|M2R1X0|M2R1X0_CERS8	M2R1X0	HC	True	180		NA	1	0	p20[21:199]	465	No	No	Gelatoporia subvermispora B	Basidiomycota	Eukaryota	Fungi	Basidiomycota	Agaricomycetes	Polyporales	Gelatoporiaceae	Gelatoporia	Gelatoporia subvermispora	914234
tr|M2Q5Y9|M2Q5Y9_CERS8	M2Q5Y9	HC	True	179		NA	1	0	p20[14:188]	348	No	No	Gelatoporia subvermispora B	Basidiomycota	Eukaryota	Fungi	Basidiomycota	Agaricomycetes	Polyporales	Gelatoporiaceae	Gelatoporia	Gelatoporia subvermispora	914234
tr|M2PHF2|M2PHF2_CERS8	M2PHF2	HC	True	128		NA	1	0	p20[65:189]	291	No	No	Gelatoporia subvermispora B	Basidiomycota	Eukaryota	Fungi	Basidiomycota	Agaricomycetes	Polyporales	Gelatoporiaceae	Gelatoporia	Gelatoporia subvermispora	914234
tr|A0A2G8RZR8|A0A2G8RZR8_9APHY	A0A2G8RZR8	HY	Pseudo	149		NA	1	0	p20[160:308]	348	No	No	Ganoderma sinense ZZ0214-1	Basidiomycota	Eukaryota	Fungi	Basidiomycota	Agaricomycetes	Polyporales	Polyporaceae	Ganoderma	Ganoderma sinense	1077348
tr|A0A022Y2N0|A0A022Y2N0_TRISD	A0A022Y2N0	HC	True	160		NA	1	0	p20[154:313]	392	No	No	Trichophyton soudanense CBS 452.61	Ascomycota	Eukaryota	Fungi	Ascomycota	Eurotiomycetes	Onygenales	Arthrodermataceae	Trichophyton	Trichophyton soudanense	1215331
tr|W9P6T5|W9P6T5_FUSOX	W9P6T5	HC	True	158		NA	1	0	p20[10:167]	675	No	No	Fusarium oxysporum f. sp. pisi HDV247	Ascomycota	Eukaryota	Fungi	Ascomycota	Sordariomycetes	Hypocreales	Nectriaceae	Fusarium	Fusarium oxysporum	1080344
tr|W9PBV8|W9PBV8_FUSOX	W9PBV8	HC	True	158		NA	1	0	p20[121:278]	367	No	No	Fusarium oxysporum f. sp. pisi HDV247	Ascomycota	Eukaryota	Fungi	Ascomycota	Sordariomycetes	Hypocreales	Nectriaceae	Fusarium	Fusarium oxysporum	1080344
tr|W9PGH9|W9PGH9_FUSOX	W9PGH9	HC	True	154		NA	1	0	p20[30:178]	667	No	No	Fusarium oxysporum f. sp. pisi HDV247	Ascomycota	Eukaryota	Fungi	Ascomycota	Sordariomycetes	Hypocreales	Nectriaceae	Fusarium	Fusarium oxysporum	1080344
tr|A0A166RWT5|A0A166RWT5_9PEZI	A0A166RWT5	HC	True	160		NA	1	0	p20[44:203]	857	No	No	Colletotrichum incanum	Ascomycota	Eukaryota	Fungi	Ascomycota	Sordariomycetes	Glomerellales	Glomerellaceae	Colletotrichum	Colletotrichum incanum	1573173
tr|A0A0J9V2F0|A0A0J9V2F0_FUSO4	A0A0J9V2F0	HC	True	145		NA	1	0	p20[13:157]	463	No	No	Fusarium oxysporum f. sp. lycopersici 4287	Ascomycota	Eukaryota	Fungi	Ascomycota	Sordariomycetes	Hypocreales	Nectriaceae	Fusarium	Fusarium oxysporum	426428
tr|A0A0D2XTU4|A0A0D2XTU4_FUSO4	A0A0D2XTU4	HC	True	145		NA	1	0	p20[13:157]	459	No	No	Fusarium oxysporum f. sp. lycopersici 4287	Ascomycota	Eukaryota	Fungi	Ascomycota	Sordariomycetes	Hypocreales	Nectriaceae	Fusarium	Fusarium oxysporum	426428
tr|A0A0D2Y1E8|A0A0D2Y1E8_FUSO4	A0A0D2Y1E8	HC	True	154		NA	1	0	p20[2:154]	632	No	No	Fusarium oxysporum f. sp. lycopersici 4287	Ascomycota	Eukaryota	Fungi	Ascomycota	Sordariomycetes	Hypocreales	Nectriaceae	Fusarium	Fusarium oxysporum	426428
tr|A0A0J9VDR2|A0A0J9VDR2_FUSO4	A0A0J9VDR2	HC	True	158		NA	1	0	p20[10:167]	675	No	No	Fusarium oxysporum f. sp. lycopersici 4287	Ascomycota	Eukaryota	Fungi	Ascomycota	Sordariomycetes	Hypocreales	Nectriaceae	Fusarium	Fusarium oxysporum	426428
tr|A0A0J9V597|A0A0J9V597_FUSO4	A0A0J9V597	HC	True	158		NA	1	0	p20[121:278]	367	No	No	Fusarium oxysporum f. sp. lycopersici 4287	Ascomycota	Eukaryota	Fungi	Ascomycota	Sordariomycetes	Hypocreales	Nectriaceae	Fusarium	Fusarium oxysporum	426428
tr|A0A0A2J7N0|A0A0A2J7N0_PENEN	A0A0A2J7N0	HC	True	156		NA	1	0	p20[10:164]	645	No	No	Penicillium expansum	Ascomycota	Eukaryota	Fungi	Ascomycota	Eurotiomycetes	Eurotiales	Aspergillaceae	Penicillium	Penicillium expansum	27334
tr|A0A1J8QE56|A0A1J8QE56_9HOMO	A0A1J8QE56	HC	True	161		NA	2	0	p20[104:267]-p20[478:638]	731	No	No	Rhizopogon vesiculosus	Basidiomycota	Eukaryota	Fungi	Basidiomycota	Agaricomycetes	Boletales	Rhizopogonaceae	Rhizopogon	Rhizopogon vesiculosus	180088
tr|A0A1J8RCF6|A0A1J8RCF6_9HOMO	A0A1J8RCF6	HC	True	178		NA	2	0	p20[13:178]-p20[469:646]	870	No	No	Rhizopogon vesiculosus	Basidiomycota	Eukaryota	Fungi	Basidiomycota	Agaricomycetes	Boletales	Rhizopogonaceae	Rhizopogon	Rhizopogon vesiculosus	180088
tr|A0A1J8QYW0|A0A1J8QYW0_9HOMO	A0A1J8QYW0	HC	True	144		NA	1	0	p20[23:166]	322	No	No	Rhizopogon vesiculosus	Basidiomycota	Eukaryota	Fungi	Basidiomycota	Agaricomycetes	Boletales	Rhizopogonaceae	Rhizopogon	Rhizopogon vesiculosus	180088
tr|A0A1J8QNX6|A0A1J8QNX6_9HOMO	A0A1J8QNX6	HC	True	185		NA	1	0	p20[14:190]	377	No	No	Rhizopogon vesiculosus	Basidiomycota	Eukaryota	Fungi	Basidiomycota	Agaricomycetes	Boletales	Rhizopogonaceae	Rhizopogon	Rhizopogon vesiculosus	180088
tr|A0A1J8Q820|A0A1J8Q820_9HOMO	A0A1J8Q820	HC	True	155		NA	1	0	p20[7:161]	1219	No	No	Rhizopogon vesiculosus	Basidiomycota	Eukaryota	Fungi	Basidiomycota	Agaricomycetes	Boletales	Rhizopogonaceae	Rhizopogon	Rhizopogon vesiculosus	180088
tr|A0A1Y2WDT6|A0A1Y2WDT6_9PEZI	A0A1Y2WDT6	HC	True	182		NA	1	0	p20[5:184]	677	No	No	Hypoxylon sp. CI-4A	Ascomycota	Eukaryota	Fungi	Ascomycota	Sordariomycetes	Xylariales	Hypoxylaceae	Hypoxylon	Hypoxylon sp. CI-4A	1001833
tr|A0A2H3CSU4|A0A2H3CSU4_ARMGA	A0A2H3CSU4	HS	Pseudo	166		NA	1	0	p20[69:234]	351	No	No	Armillaria gallica	Basidiomycota	Eukaryota	Fungi	Basidiomycota	Agaricomycetes	Agaricales	Physalacriaceae	Armillaria	Armillaria gallica	47427
tr|A0A2H3ELH4|A0A2H3ELH4_ARMGA	A0A2H3ELH4	HC	True	172		NA	2	0	p20[136:307]-p20[431:592]	713	No	No	Armillaria gallica	Basidiomycota	Eukaryota	Fungi	Basidiomycota	Agaricomycetes	Agaricales	Physalacriaceae	Armillaria	Armillaria gallica	47427
tr|A0A2H3D5N1|A0A2H3D5N1_ARMGA	A0A2H3D5N1	HC	True	174		NA	1	0	p20[141:314]	430	No	No	Armillaria gallica	Basidiomycota	Eukaryota	Fungi	Basidiomycota	Agaricomycetes	Agaricales	Physalacriaceae	Armillaria	Armillaria gallica	47427
tr|A0A2H3D626|A0A2H3D626_ARMGA	A0A2H3D626	HC	True	169		NA	1	0	p20[37:195]	817	No	No	Armillaria gallica	Basidiomycota	Eukaryota	Fungi	Basidiomycota	Agaricomycetes	Agaricales	Physalacriaceae	Armillaria	Armillaria gallica	47427
tr|A0A2H3EL33|A0A2H3EL33_ARMGA	A0A2H3EL33	HC	True	170		NA	1	0	p20[151:320]	441	No	No	Armillaria gallica	Basidiomycota	Eukaryota	Fungi	Basidiomycota	Agaricomycetes	Agaricales	Physalacriaceae	Armillaria	Armillaria gallica	47427
tr|A0A2H3CNN6|A0A2H3CNN6_ARMGA	A0A2H3CNN6	HC	True	149		NA	1	0	p20[59:207]	328	No	No	Armillaria gallica	Basidiomycota	Eukaryota	Fungi	Basidiomycota	Agaricomycetes	Agaricales	Physalacriaceae	Armillaria	Armillaria gallica	47427
tr|A0A2H3D6T5|A0A2H3D6T5_ARMGA	A0A2H3D6T5	HC	True	180		NA	1	0	p20[27:197]	791	No	No	Armillaria gallica	Basidiomycota	Eukaryota	Fungi	Basidiomycota	Agaricomycetes	Agaricales	Physalacriaceae	Armillaria	Armillaria gallica	47427
tr|A0A2H3CIU0|A0A2H3CIU0_ARMGA	A0A2H3CIU0	HS	Pseudo	149		NA	1	0	p20[14:162]	258	No	No	Armillaria gallica	Basidiomycota	Eukaryota	Fungi	Basidiomycota	Agaricomycetes	Agaricales	Physalacriaceae	Armillaria	Armillaria gallica	47427
tr|A0A2H3E272|A0A2H3E272_ARMGA	A0A2H3E272	HC	True	178		NA	1	0	p20[100:277]	390	No	No	Armillaria gallica	Basidiomycota	Eukaryota	Fungi	Basidiomycota	Agaricomycetes	Agaricales	Physalacriaceae	Armillaria	Armillaria gallica	47427
tr|A0A2H3DAT6|A0A2H3DAT6_ARMGA	A0A2H3DAT6	HS	Pseudo	163		NA	1	0	p20[69:231]	351	No	No	Armillaria gallica	Basidiomycota	Eukaryota	Fungi	Basidiomycota	Agaricomycetes	Agaricales	Physalacriaceae	Armillaria	Armillaria gallica	47427
tr|A0A2H3ECS1|A0A2H3ECS1_ARMGA	A0A2H3ECS1	HC	True	153		NA	1	0	p20[53:205]	701	No	No	Armillaria gallica	Basidiomycota	Eukaryota	Fungi	Basidiomycota	Agaricomycetes	Agaricales	Physalacriaceae	Armillaria	Armillaria gallica	47427
tr|A0A2H3CQ75|A0A2H3CQ75_ARMGA	A0A2H3CQ75	HS	Pseudo	167		NA	1	0	p20[69:235]	351	No	No	Armillaria gallica	Basidiomycota	Eukaryota	Fungi	Basidiomycota	Agaricomycetes	Agaricales	Physalacriaceae	Armillaria	Armillaria gallica	47427
tr|A0A2H3EC60|A0A2H3EC60_ARMGA	A0A2H3EC60	HC	True	180		NA	1	0	p20[36:211]	356	No	No	Armillaria gallica	Basidiomycota	Eukaryota	Fungi	Basidiomycota	Agaricomycetes	Agaricales	Physalacriaceae	Armillaria	Armillaria gallica	47427
tr|A0A2H3CMX6|A0A2H3CMX6_ARMGA	A0A2H3CMX6	HC	True	162		NA	1	0	p20[92:249]	358	No	No	Armillaria gallica	Basidiomycota	Eukaryota	Fungi	Basidiomycota	Agaricomycetes	Agaricales	Physalacriaceae	Armillaria	Armillaria gallica	47427
tr|A0A2H3DQY8|A0A2H3DQY8_ARMGA	A0A2H3DQY8	HC	True	185		NA	1	0	p20[59:242]	518	No	No	Armillaria gallica	Basidiomycota	Eukaryota	Fungi	Basidiomycota	Agaricomycetes	Agaricales	Physalacriaceae	Armillaria	Armillaria gallica	47427
tr|A0A2H3E198|A0A2H3E198_ARMGA	A0A2H3E198	HC	True	150		NA	1	0	p20[37:186]	311	No	No	Armillaria gallica	Basidiomycota	Eukaryota	Fungi	Basidiomycota	Agaricomycetes	Agaricales	Physalacriaceae	Armillaria	Armillaria gallica	47427
tr|A0A2H3EL44|A0A2H3EL44_ARMGA	A0A2H3EL44	HC	True	175		NA	1	0	p20[140:314]	429	No	No	Armillaria gallica	Basidiomycota	Eukaryota	Fungi	Basidiomycota	Agaricomycetes	Agaricales	Physalacriaceae	Armillaria	Armillaria gallica	47427
tr|A0A2H3CRK4|A0A2H3CRK4_ARMGA	A0A2H3CRK4	HC	True	173		NA	1	0	p20[42:213]	753	No	No	Armillaria gallica	Basidiomycota	Eukaryota	Fungi	Basidiomycota	Agaricomycetes	Agaricales	Physalacriaceae	Armillaria	Armillaria gallica	47427
tr|A0A2H3CZV0|A0A2H3CZV0_ARMGA	A0A2H3CZV0	HC	True	173		NA	1	0	p20[61:232]	799	No	No	Armillaria gallica	Basidiomycota	Eukaryota	Fungi	Basidiomycota	Agaricomycetes	Agaricales	Physalacriaceae	Armillaria	Armillaria gallica	47427
tr|A0A2H3E5P8|A0A2H3E5P8_ARMGA	A0A2H3E5P8	HG	Pseudo	177		NA	1	0	p20[61:237]	344	No	No	Armillaria gallica	Basidiomycota	Eukaryota	Fungi	Basidiomycota	Agaricomycetes	Agaricales	Physalacriaceae	Armillaria	Armillaria gallica	47427
tr|A0A2H3D607|A0A2H3D607_ARMGA	A0A2H3D607	HS	Pseudo	156		NA	1	0	p20[5:160]	161	No	No	Armillaria gallica	Basidiomycota	Eukaryota	Fungi	Basidiomycota	Agaricomycetes	Agaricales	Physalacriaceae	Armillaria	Armillaria gallica	47427
tr|A0A2H3DJ26|A0A2H3DJ26_ARMGA	A0A2H3DJ26	HC	True	148		NA	1	0	p20[25:163]	277	No	No	Armillaria gallica	Basidiomycota	Eukaryota	Fungi	Basidiomycota	Agaricomycetes	Agaricales	Physalacriaceae	Armillaria	Armillaria gallica	47427
tr|A0A2H3CIP4|A0A2H3CIP4_ARMGA	A0A2H3CIP4	HC	True	146		NA	1	0	p20[5:150]	160	No	No	Armillaria gallica	Basidiomycota	Eukaryota	Fungi	Basidiomycota	Agaricomycetes	Agaricales	Physalacriaceae	Armillaria	Armillaria gallica	47427
tr|A0A2H3DWC0|A0A2H3DWC0_ARMGA	A0A2H3DWC0	SC	Pseudo	160		NA	1	0	p20[141:300]	383	No	No	Armillaria gallica	Basidiomycota	Eukaryota	Fungi	Basidiomycota	Agaricomycetes	Agaricales	Physalacriaceae	Armillaria	Armillaria gallica	47427
tr|A0A2H3D1N2|A0A2H3D1N2_ARMGA	A0A2H3D1N2	HC	True	184		NA	1	0	p20[254:437]	549	No	No	Armillaria gallica	Basidiomycota	Eukaryota	Fungi	Basidiomycota	Agaricomycetes	Agaricales	Physalacriaceae	Armillaria	Armillaria gallica	47427
tr|A0A2H3EI63|A0A2H3EI63_ARMGA	A0A2H3EI63	HC	True	168		NA	1	0	p20[375:542]	1089	No	No	Armillaria gallica	Basidiomycota	Eukaryota	Fungi	Basidiomycota	Agaricomycetes	Agaricales	Physalacriaceae	Armillaria	Armillaria gallica	47427
tr|A0A2H3EA28|A0A2H3EA28_ARMGA	A0A2H3EA28	HC	True	146		NA	1	0	p20[7:150]	276	No	No	Armillaria gallica	Basidiomycota	Eukaryota	Fungi	Basidiomycota	Agaricomycetes	Agaricales	Physalacriaceae	Armillaria	Armillaria gallica	47427
tr|A0A2H3CVR3|A0A2H3CVR3_ARMGA	A0A2H3CVR3	HC	True	182		NA	1	0	p20[16:187]	345	No	No	Armillaria gallica	Basidiomycota	Eukaryota	Fungi	Basidiomycota	Agaricomycetes	Agaricales	Physalacriaceae	Armillaria	Armillaria gallica	47427
tr|A0A2H3DSS6|A0A2H3DSS6_ARMGA	A0A2H3DSS6	HC	True	153		NA	1	0	p20[33:185]	518	No	No	Armillaria gallica	Basidiomycota	Eukaryota	Fungi	Basidiomycota	Agaricomycetes	Agaricales	Physalacriaceae	Armillaria	Armillaria gallica	47427
tr|A0A2H3D9W2|A0A2H3D9W2_ARMGA	A0A2H3D9W2	HC	True	183		NA	1	0	p20[143:325]	399	No	No	Armillaria gallica	Basidiomycota	Eukaryota	Fungi	Basidiomycota	Agaricomycetes	Agaricales	Physalacriaceae	Armillaria	Armillaria gallica	47427
tr|A0A2H3E6X1|A0A2H3E6X1_ARMGA	A0A2H3E6X1	HC	True	176		NA	1	0	p20[1582:1757]	2112	No	No	Armillaria gallica	Basidiomycota	Eukaryota	Fungi	Basidiomycota	Agaricomycetes	Agaricales	Physalacriaceae	Armillaria	Armillaria gallica	47427
tr|A0A2H3DWR9|A0A2H3DWR9_ARMGA	A0A2H3DWR9	HC	True	177		NA	1	0	p20[82:258]	375	No	No	Armillaria gallica	Basidiomycota	Eukaryota	Fungi	Basidiomycota	Agaricomycetes	Agaricales	Physalacriaceae	Armillaria	Armillaria gallica	47427
tr|A0A2H3D057|A0A2H3D057_ARMGA	A0A2H3D057	HC	True	182		NA	1	0	p20[144:325]	440	No	No	Armillaria gallica	Basidiomycota	Eukaryota	Fungi	Basidiomycota	Agaricomycetes	Agaricales	Physalacriaceae	Armillaria	Armillaria gallica	47427
tr|A0A2H3ENY0|A0A2H3ENY0_ARMGA	A0A2H3ENY0	HC	True	193		NA	1	0	p20[94:286]	389	No	No	Armillaria gallica	Basidiomycota	Eukaryota	Fungi	Basidiomycota	Agaricomycetes	Agaricales	Physalacriaceae	Armillaria	Armillaria gallica	47427
tr|A0A2H3D7F2|A0A2H3D7F2_ARMGA	A0A2H3D7F2	HC	True	164		NA	1	0	p20[85:248]	766	No	No	Armillaria gallica	Basidiomycota	Eukaryota	Fungi	Basidiomycota	Agaricomycetes	Agaricales	Physalacriaceae	Armillaria	Armillaria gallica	47427
tr|A0A2H3CZE6|A0A2H3CZE6_ARMGA	A0A2H3CZE6	QY	Pseudo	147		NA	1	0	p20[2:148]	151	No	No	Armillaria gallica	Basidiomycota	Eukaryota	Fungi	Basidiomycota	Agaricomycetes	Agaricales	Physalacriaceae	Armillaria	Armillaria gallica	47427
tr|A0A2H3CT70|A0A2H3CT70_ARMGA	A0A2H3CT70	HC	True	172		NA	1	0	p20[162:329]	460	No	No	Armillaria gallica	Basidiomycota	Eukaryota	Fungi	Basidiomycota	Agaricomycetes	Agaricales	Physalacriaceae	Armillaria	Armillaria gallica	47427
tr|A0A2H3EA41|A0A2H3EA41_ARMGA	A0A2H3EA41	HC	True	160		NA	1	0	p20[4:162]	265	No	No	Armillaria gallica	Basidiomycota	Eukaryota	Fungi	Basidiomycota	Agaricomycetes	Agaricales	Physalacriaceae	Armillaria	Armillaria gallica	47427
tr|A0A2H3DT73|A0A2H3DT73_ARMGA	A0A2H3DT73	HC	True	176		NA	1	0	p20[19:194]	201	No	No	Armillaria gallica	Basidiomycota	Eukaryota	Fungi	Basidiomycota	Agaricomycetes	Agaricales	Physalacriaceae	Armillaria	Armillaria gallica	47427
tr|A0A2H3DT18|A0A2H3DT18_ARMGA	A0A2H3DT18	HC	True	158		NA	1	0	p20[10:162]	655	No	No	Armillaria gallica	Basidiomycota	Eukaryota	Fungi	Basidiomycota	Agaricomycetes	Agaricales	Physalacriaceae	Armillaria	Armillaria gallica	47427
tr|A0A2H3E553|A0A2H3E553_ARMGA	A0A2H3E553	HC	True	153		NA	1	0	p20[10:162]	658	No	No	Armillaria gallica	Basidiomycota	Eukaryota	Fungi	Basidiomycota	Agaricomycetes	Agaricales	Physalacriaceae	Armillaria	Armillaria gallica	47427
tr|A0A2H3EA65|A0A2H3EA65_ARMGA	A0A2H3EA65	HC	True	179		NA	1	0	p20[68:238]	356	No	No	Armillaria gallica	Basidiomycota	Eukaryota	Fungi	Basidiomycota	Agaricomycetes	Agaricales	Physalacriaceae	Armillaria	Armillaria gallica	47427
tr|A0A2H3DLV6|A0A2H3DLV6_ARMGA	A0A2H3DLV6	HC	True	166		NA	1	0	p20[114:279]	404	No	No	Armillaria gallica	Basidiomycota	Eukaryota	Fungi	Basidiomycota	Agaricomycetes	Agaricales	Physalacriaceae	Armillaria	Armillaria gallica	47427
tr|A0A2H3CHY2|A0A2H3CHY2_ARMGA	A0A2H3CHY2	HC	True	154		NA	1	0	p20[1:153]	163	No	No	Armillaria gallica	Basidiomycota	Eukaryota	Fungi	Basidiomycota	Agaricomycetes	Agaricales	Physalacriaceae	Armillaria	Armillaria gallica	47427
tr|A0A2H3CWY6|A0A2H3CWY6_ARMGA	A0A2H3CWY6	HS	Pseudo	162		NA	1	0	p20[1:162]	259	No	No	Armillaria gallica	Basidiomycota	Eukaryota	Fungi	Basidiomycota	Agaricomycetes	Agaricales	Physalacriaceae	Armillaria	Armillaria gallica	47427
tr|A0A2H3CCM4|A0A2H3CCM4_ARMGA	A0A2H3CCM4	HS	Pseudo	178		NA	1	0	p20[176:353]	450	No	No	Armillaria gallica	Basidiomycota	Eukaryota	Fungi	Basidiomycota	Agaricomycetes	Agaricales	Physalacriaceae	Armillaria	Armillaria gallica	47427
tr|A0A2H3CRN7|A0A2H3CRN7_ARMGA	A0A2H3CRN7	HC	True	172		NA	2	0	p20[52:257]-p20[339:510]	638	No	No	Armillaria gallica	Basidiomycota	Eukaryota	Fungi	Basidiomycota	Agaricomycetes	Agaricales	Physalacriaceae	Armillaria	Armillaria gallica	47427
tr|A0A2H3E2A9|A0A2H3E2A9_ARMGA	A0A2H3E2A9	HC	True	181		NA	1	0	p20[132:308]	425	No	No	Armillaria gallica	Basidiomycota	Eukaryota	Fungi	Basidiomycota	Agaricomycetes	Agaricales	Physalacriaceae	Armillaria	Armillaria gallica	47427
tr|A0A2H3CX86|A0A2H3CX86_ARMGA	A0A2H3CX86	HC	True	167		NA	1	0	p20[53:219]	767	No	No	Armillaria gallica	Basidiomycota	Eukaryota	Fungi	Basidiomycota	Agaricomycetes	Agaricales	Physalacriaceae	Armillaria	Armillaria gallica	47427
tr|A0A2H3D134|A0A2H3D134_ARMGA	A0A2H3D134	HC	True	168		NA	1	0	p20[1:167]	182	No	No	Armillaria gallica	Basidiomycota	Eukaryota	Fungi	Basidiomycota	Agaricomycetes	Agaricales	Physalacriaceae	Armillaria	Armillaria gallica	47427
tr|A0A2H3DW49|A0A2H3DW49_ARMGA	A0A2H3DW49	HC	True	154		NA	1	0	p20[72:225]	343	No	No	Armillaria gallica	Basidiomycota	Eukaryota	Fungi	Basidiomycota	Agaricomycetes	Agaricales	Physalacriaceae	Armillaria	Armillaria gallica	47427
tr|A0A2H3EAI2|A0A2H3EAI2_ARMGA	A0A2H3EAI2	HC	True	158		NA	1	0	p20[30:182]	678	No	No	Armillaria gallica	Basidiomycota	Eukaryota	Fungi	Basidiomycota	Agaricomycetes	Agaricales	Physalacriaceae	Armillaria	Armillaria gallica	47427
tr|A0A2H3CUG4|A0A2H3CUG4_ARMGA	A0A2H3CUG4	HC	True	112		NA	1	0	p20[11:122]	128	No	No	Armillaria gallica	Basidiomycota	Eukaryota	Fungi	Basidiomycota	Agaricomycetes	Agaricales	Physalacriaceae	Armillaria	Armillaria gallica	47427
tr|A0A2H3CIP5|A0A2H3CIP5_ARMGA	A0A2H3CIP5	HC	True	174		NA	1	0	p20[97:270]	309	No	No	Armillaria gallica	Basidiomycota	Eukaryota	Fungi	Basidiomycota	Agaricomycetes	Agaricales	Physalacriaceae	Armillaria	Armillaria gallica	47427
tr|A0A2H3CXB4|A0A2H3CXB4_ARMGA	A0A2H3CXB4	HC	True	164		NA	1	0	p20[25:188]	288	No	No	Armillaria gallica	Basidiomycota	Eukaryota	Fungi	Basidiomycota	Agaricomycetes	Agaricales	Physalacriaceae	Armillaria	Armillaria gallica	47427
tr|A0A2H3DU27|A0A2H3DU27_ARMGA	A0A2H3DU27	HC	True	172		NA	1	0	p20[121:292]	411	No	No	Armillaria gallica	Basidiomycota	Eukaryota	Fungi	Basidiomycota	Agaricomycetes	Agaricales	Physalacriaceae	Armillaria	Armillaria gallica	47427
tr|A0A2H3E6J9|A0A2H3E6J9_ARMGA	A0A2H3E6J9	YC	Pseudo	166		NA	1	0	p20[452:616]	1259	No	No	Armillaria gallica	Basidiomycota	Eukaryota	Fungi	Basidiomycota	Agaricomycetes	Agaricales	Physalacriaceae	Armillaria	Armillaria gallica	47427
tr|A0A2H3DHA3|A0A2H3DHA3_ARMGA	A0A2H3DHA3	HC	True	171		NA	1	0	p20[2:172]	175	No	No	Armillaria gallica	Basidiomycota	Eukaryota	Fungi	Basidiomycota	Agaricomycetes	Agaricales	Physalacriaceae	Armillaria	Armillaria gallica	47427
tr|A0A2H3DP40|A0A2H3DP40_ARMGA	A0A2H3DP40	HC	True	172		NA	1	0	p20[2:173]	176	No	No	Armillaria gallica	Basidiomycota	Eukaryota	Fungi	Basidiomycota	Agaricomycetes	Agaricales	Physalacriaceae	Armillaria	Armillaria gallica	47427
tr|A0A2H3DRQ5|A0A2H3DRQ5_ARMGA	A0A2H3DRQ5	HC	True	187		NA	1	0	p20[28:214]	347	No	No	Armillaria gallica	Basidiomycota	Eukaryota	Fungi	Basidiomycota	Agaricomycetes	Agaricales	Physalacriaceae	Armillaria	Armillaria gallica	47427
tr|A0A2H3CN52|A0A2H3CN52_ARMGA	A0A2H3CN52	HC	True	164		NA	1	0	p20[40:203]	778	No	No	Armillaria gallica	Basidiomycota	Eukaryota	Fungi	Basidiomycota	Agaricomycetes	Agaricales	Physalacriaceae	Armillaria	Armillaria gallica	47427
tr|A0A2H3DVY0|A0A2H3DVY0_ARMGA	A0A2H3DVY0	NC	Pseudo	153		NA	1	0	p20[123:275]	397	No	No	Armillaria gallica	Basidiomycota	Eukaryota	Fungi	Basidiomycota	Agaricomycetes	Agaricales	Physalacriaceae	Armillaria	Armillaria gallica	47427
tr|A0A2H3E604|A0A2H3E604_ARMGA	A0A2H3E604	HC	True	161		NA	1	0	p20[4:164]	164	No	No	Armillaria gallica	Basidiomycota	Eukaryota	Fungi	Basidiomycota	Agaricomycetes	Agaricales	Physalacriaceae	Armillaria	Armillaria gallica	47427
tr|A0A2H3D1M4|A0A2H3D1M4_ARMGA	A0A2H3D1M4	HC	True	161		NA	1	0	p20[11:171]	174	No	No	Armillaria gallica	Basidiomycota	Eukaryota	Fungi	Basidiomycota	Agaricomycetes	Agaricales	Physalacriaceae	Armillaria	Armillaria gallica	47427
tr|A0A2H3D9W8|A0A2H3D9W8_ARMGA	A0A2H3D9W8	HC	True	142		NA	1	0	p20[97:238]	321	No	No	Armillaria gallica	Basidiomycota	Eukaryota	Fungi	Basidiomycota	Agaricomycetes	Agaricales	Physalacriaceae	Armillaria	Armillaria gallica	47427
tr|A0A2H3DSM6|A0A2H3DSM6_ARMGA	A0A2H3DSM6	HC	True	157		NA	1	0	p20[127:283]	409	No	No	Armillaria gallica	Basidiomycota	Eukaryota	Fungi	Basidiomycota	Agaricomycetes	Agaricales	Physalacriaceae	Armillaria	Armillaria gallica	47427
tr|A0A2H3D8M4|A0A2H3D8M4_ARMGA	A0A2H3D8M4	HC	True	177		NA	1	0	p20[117:293]	389	No	No	Armillaria gallica	Basidiomycota	Eukaryota	Fungi	Basidiomycota	Agaricomycetes	Agaricales	Physalacriaceae	Armillaria	Armillaria gallica	47427
tr|A0A2H3D107|A0A2H3D107_ARMGA	A0A2H3D107	HC	True	158		NA	1	0	p20[1:158]	161	No	No	Armillaria gallica	Basidiomycota	Eukaryota	Fungi	Basidiomycota	Agaricomycetes	Agaricales	Physalacriaceae	Armillaria	Armillaria gallica	47427
tr|A0A2H3ELZ3|A0A2H3ELZ3_ARMGA	A0A2H3ELZ3	HC	True	175		NA	1	0	p20[153:326]	448	No	No	Armillaria gallica	Basidiomycota	Eukaryota	Fungi	Basidiomycota	Agaricomycetes	Agaricales	Physalacriaceae	Armillaria	Armillaria gallica	47427
tr|A0A2H3DMH7|A0A2H3DMH7_ARMGA	A0A2H3DMH7	HC	True	152		NA	1	0	p20[2:152]	163	No	No	Armillaria gallica	Basidiomycota	Eukaryota	Fungi	Basidiomycota	Agaricomycetes	Agaricales	Physalacriaceae	Armillaria	Armillaria gallica	47427
tr|A0A2H3D6H4|A0A2H3D6H4_ARMGA	A0A2H3D6H4	HC	True	184		NA	1	0	p20[104:287]	417	No	No	Armillaria gallica	Basidiomycota	Eukaryota	Fungi	Basidiomycota	Agaricomycetes	Agaricales	Physalacriaceae	Armillaria	Armillaria gallica	47427
tr|A0A2H3DY75|A0A2H3DY75_ARMGA	A0A2H3DY75	HS	Pseudo	194		NA	1	0	p20[93:277]	397	No	No	Armillaria gallica	Basidiomycota	Eukaryota	Fungi	Basidiomycota	Agaricomycetes	Agaricales	Physalacriaceae	Armillaria	Armillaria gallica	47427
tr|A0A2H3EA14|A0A2H3EA14_ARMGA	A0A2H3EA14	HC	True	163		NA	1	0	p20[20:182]	399	No	No	Armillaria gallica	Basidiomycota	Eukaryota	Fungi	Basidiomycota	Agaricomycetes	Agaricales	Physalacriaceae	Armillaria	Armillaria gallica	47427
tr|A0A2H3D358|A0A2H3D358_ARMGA	A0A2H3D358	HC	True	168		NA	1	0	p20[1:168]	171	No	No	Armillaria gallica	Basidiomycota	Eukaryota	Fungi	Basidiomycota	Agaricomycetes	Agaricales	Physalacriaceae	Armillaria	Armillaria gallica	47427
tr|A0A2H3E5Y5|A0A2H3E5Y5_ARMGA	A0A2H3E5Y5	HC	True	194		NA	1	0	p20[109:302]	414	No	No	Armillaria gallica	Basidiomycota	Eukaryota	Fungi	Basidiomycota	Agaricomycetes	Agaricales	Physalacriaceae	Armillaria	Armillaria gallica	47427
tr|A0A2H3EAM4|A0A2H3EAM4_ARMGA	A0A2H3EAM4	HC	True	164		NA	1	0	p20[135:298]	929	No	No	Armillaria gallica	Basidiomycota	Eukaryota	Fungi	Basidiomycota	Agaricomycetes	Agaricales	Physalacriaceae	Armillaria	Armillaria gallica	47427
tr|A0A2H3CS55|A0A2H3CS55_ARMGA	A0A2H3CS55	HC	True	160		NA	1	0	p20[78:237]	744	No	No	Armillaria gallica	Basidiomycota	Eukaryota	Fungi	Basidiomycota	Agaricomycetes	Agaricales	Physalacriaceae	Armillaria	Armillaria gallica	47427
tr|A0A2H3DDB4|A0A2H3DDB4_ARMGA	A0A2H3DDB4	HC	True	162		NA	1	0	p20[1:162]	166	No	No	Armillaria gallica	Basidiomycota	Eukaryota	Fungi	Basidiomycota	Agaricomycetes	Agaricales	Physalacriaceae	Armillaria	Armillaria gallica	47427
tr|A0A2H3CY95|A0A2H3CY95_ARMGA	A0A2H3CY95	FC	Pseudo	167		NA	1	0	p20[127:293]	413	No	No	Armillaria gallica	Basidiomycota	Eukaryota	Fungi	Basidiomycota	Agaricomycetes	Agaricales	Physalacriaceae	Armillaria	Armillaria gallica	47427
tr|A0A2H3CRX9|A0A2H3CRX9_ARMGA	A0A2H3CRX9	HC	True	148		NA	1	0	p20[1:148]	154	No	No	Armillaria gallica	Basidiomycota	Eukaryota	Fungi	Basidiomycota	Agaricomycetes	Agaricales	Physalacriaceae	Armillaria	Armillaria gallica	47427
tr|A0A2H3DIK6|A0A2H3DIK6_ARMGA	A0A2H3DIK6	HC	True	172		NA	1	0	p20[181:352]	471	No	No	Armillaria gallica	Basidiomycota	Eukaryota	Fungi	Basidiomycota	Agaricomycetes	Agaricales	Physalacriaceae	Armillaria	Armillaria gallica	47427
tr|A0A2H3DIB5|A0A2H3DIB5_ARMGA	A0A2H3DIB5	HC	True	187		NA	1	0	p20[90:269]	383	No	No	Armillaria gallica	Basidiomycota	Eukaryota	Fungi	Basidiomycota	Agaricomycetes	Agaricales	Physalacriaceae	Armillaria	Armillaria gallica	47427
tr|A0A2H3CQW0|A0A2H3CQW0_ARMGA	A0A2H3CQW0	HC	True	178		NA	1	0	p20[50:217]	716	No	No	Armillaria gallica	Basidiomycota	Eukaryota	Fungi	Basidiomycota	Agaricomycetes	Agaricales	Physalacriaceae	Armillaria	Armillaria gallica	47427
tr|A0A2H3D8B3|A0A2H3D8B3_ARMGA	A0A2H3D8B3	HC	True	152		NA	1	0	p20[20:171]	218	No	No	Armillaria gallica	Basidiomycota	Eukaryota	Fungi	Basidiomycota	Agaricomycetes	Agaricales	Physalacriaceae	Armillaria	Armillaria gallica	47427
tr|A0A2H3DCC0|A0A2H3DCC0_ARMGA	A0A2H3DCC0	HC	True	166		NA	1	0	p20[130:295]	430	No	No	Armillaria gallica	Basidiomycota	Eukaryota	Fungi	Basidiomycota	Agaricomycetes	Agaricales	Physalacriaceae	Armillaria	Armillaria gallica	47427
tr|A0A2H3CQE3|A0A2H3CQE3_ARMGA	A0A2H3CQE3	HS	Pseudo	156		NA	1	0	p20[1:156]	159	No	No	Armillaria gallica	Basidiomycota	Eukaryota	Fungi	Basidiomycota	Agaricomycetes	Agaricales	Physalacriaceae	Armillaria	Armillaria gallica	47427
tr|A0A2H3CVY8|A0A2H3CVY8_ARMGA	A0A2H3CVY8	HC	True	183		NA	1	0	p20[120:299]	413	No	No	Armillaria gallica	Basidiomycota	Eukaryota	Fungi	Basidiomycota	Agaricomycetes	Agaricales	Physalacriaceae	Armillaria	Armillaria gallica	47427
tr|A0A2H3DIJ7|A0A2H3DIJ7_ARMGA	A0A2H3DIJ7	HC	True	146		NA	1	0	p20[1:146]	266	No	No	Armillaria gallica	Basidiomycota	Eukaryota	Fungi	Basidiomycota	Agaricomycetes	Agaricales	Physalacriaceae	Armillaria	Armillaria gallica	47427
tr|A0A2H3DMG4|A0A2H3DMG4_ARMGA	A0A2H3DMG4	HC	True	145		NA	1	0	p20[181:325]	498	No	No	Armillaria gallica	Basidiomycota	Eukaryota	Fungi	Basidiomycota	Agaricomycetes	Agaricales	Physalacriaceae	Armillaria	Armillaria gallica	47427
tr|A0A2H3ERZ1|A0A2H3ERZ1_ARMGA	A0A2H3ERZ1	HC	True	160		NA	1	0	p20[4:163]	163	No	No	Armillaria gallica	Basidiomycota	Eukaryota	Fungi	Basidiomycota	Agaricomycetes	Agaricales	Physalacriaceae	Armillaria	Armillaria gallica	47427
tr|A0A2H3DS89|A0A2H3DS89_ARMGA	A0A2H3DS89	HC	True	168		NA	1	0	p20[2:169]	171	No	No	Armillaria gallica	Basidiomycota	Eukaryota	Fungi	Basidiomycota	Agaricomycetes	Agaricales	Physalacriaceae	Armillaria	Armillaria gallica	47427
tr|A0A2H3DEP5|A0A2H3DEP5_ARMGA	A0A2H3DEP5	HC	True	155		NA	1	0	p20[125:276]	414	No	No	Armillaria gallica	Basidiomycota	Eukaryota	Fungi	Basidiomycota	Agaricomycetes	Agaricales	Physalacriaceae	Armillaria	Armillaria gallica	47427
tr|A0A2H3D2K6|A0A2H3D2K6_ARMGA	A0A2H3D2K6	HC	True	154		NA	1	0	p20[29:178]	284	No	No	Armillaria gallica	Basidiomycota	Eukaryota	Fungi	Basidiomycota	Agaricomycetes	Agaricales	Physalacriaceae	Armillaria	Armillaria gallica	47427
tr|A0A2H3E734|A0A2H3E734_ARMGA	A0A2H3E734	HC	True	170		NA	1	0	p20[31:200]	351	No	No	Armillaria gallica	Basidiomycota	Eukaryota	Fungi	Basidiomycota	Agaricomycetes	Agaricales	Physalacriaceae	Armillaria	Armillaria gallica	47427
tr|A0A2H3E6I3|A0A2H3E6I3_ARMGA	A0A2H3E6I3	HC	True	154		NA	1	0	p20[59:210]	761	No	No	Armillaria gallica	Basidiomycota	Eukaryota	Fungi	Basidiomycota	Agaricomycetes	Agaricales	Physalacriaceae	Armillaria	Armillaria gallica	47427
tr|A0A2H3E6Y4|A0A2H3E6Y4_ARMGA	A0A2H3E6Y4	HC	True	169		NA	1	0	p20[422:590]	975	No	No	Armillaria gallica	Basidiomycota	Eukaryota	Fungi	Basidiomycota	Agaricomycetes	Agaricales	Physalacriaceae	Armillaria	Armillaria gallica	47427
tr|A0A2H3DD52|A0A2H3DD52_ARMGA	A0A2H3DD52	HC	True	162		NA	1	0	p20[145:306]	401	No	No	Armillaria gallica	Basidiomycota	Eukaryota	Fungi	Basidiomycota	Agaricomycetes	Agaricales	Physalacriaceae	Armillaria	Armillaria gallica	47427
tr|A0A2H3CIM6|A0A2H3CIM6_ARMGA	A0A2H3CIM6	HC	True	158		NA	1	0	p20[11:168]	171	No	No	Armillaria gallica	Basidiomycota	Eukaryota	Fungi	Basidiomycota	Agaricomycetes	Agaricales	Physalacriaceae	Armillaria	Armillaria gallica	47427
tr|A0A2H3CMR3|A0A2H3CMR3_ARMGA	A0A2H3CMR3	HC	True	144		NA	1	0	p20[1:144]	150	No	No	Armillaria gallica	Basidiomycota	Eukaryota	Fungi	Basidiomycota	Agaricomycetes	Agaricales	Physalacriaceae	Armillaria	Armillaria gallica	47427
tr|A0A2H3DDE8|A0A2H3DDE8_ARMGA	A0A2H3DDE8	HC	True	182		NA	1	0	p20[20:194]	344	No	No	Armillaria gallica	Basidiomycota	Eukaryota	Fungi	Basidiomycota	Agaricomycetes	Agaricales	Physalacriaceae	Armillaria	Armillaria gallica	47427
tr|A0A2H3DJY1|A0A2H3DJY1_ARMGA	A0A2H3DJY1	HC	True	166		NA	1	0	p20[151:315]	389	No	No	Armillaria gallica	Basidiomycota	Eukaryota	Fungi	Basidiomycota	Agaricomycetes	Agaricales	Physalacriaceae	Armillaria	Armillaria gallica	47427
tr|A0A2H3D2L7|A0A2H3D2L7_ARMGA	A0A2H3D2L7	HC	True	138		NA	1	0	p20[21:152]	272	No	No	Armillaria gallica	Basidiomycota	Eukaryota	Fungi	Basidiomycota	Agaricomycetes	Agaricales	Physalacriaceae	Armillaria	Armillaria gallica	47427
tr|A0A2H3ER49|A0A2H3ER49_ARMGA	A0A2H3ER49	HC	True	160		NA	1	0	p20[417:576]	1179	No	No	Armillaria gallica	Basidiomycota	Eukaryota	Fungi	Basidiomycota	Agaricomycetes	Agaricales	Physalacriaceae	Armillaria	Armillaria gallica	47427
tr|A0A2H3D7V5|A0A2H3D7V5_ARMGA	A0A2H3D7V5	HS	Pseudo	168		NA	1	0	p20[16:183]	202	No	No	Armillaria gallica	Basidiomycota	Eukaryota	Fungi	Basidiomycota	Agaricomycetes	Agaricales	Physalacriaceae	Armillaria	Armillaria gallica	47427
tr|A0A2H3CT58|A0A2H3CT58_ARMGA	A0A2H3CT58	HC	True	184		NA	1	0	p20[151:334]	447	No	No	Armillaria gallica	Basidiomycota	Eukaryota	Fungi	Basidiomycota	Agaricomycetes	Agaricales	Physalacriaceae	Armillaria	Armillaria gallica	47427
tr|A0A2H3CCY1|A0A2H3CCY1_ARMGA	A0A2H3CCY1	HC	True	174		NA	1	0	p20[62:235]	353	No	No	Armillaria gallica	Basidiomycota	Eukaryota	Fungi	Basidiomycota	Agaricomycetes	Agaricales	Physalacriaceae	Armillaria	Armillaria gallica	47427
tr|A0A2H3D338|A0A2H3D338_ARMGA	A0A2H3D338	HC	True	144		NA	1	0	p20[2:145]	151	No	No	Armillaria gallica	Basidiomycota	Eukaryota	Fungi	Basidiomycota	Agaricomycetes	Agaricales	Physalacriaceae	Armillaria	Armillaria gallica	47427
tr|A0A2H3D7G0|A0A2H3D7G0_ARMGA	A0A2H3D7G0	HC	True	163		NA	1	0	p20[165:327]	454	No	No	Armillaria gallica	Basidiomycota	Eukaryota	Fungi	Basidiomycota	Agaricomycetes	Agaricales	Physalacriaceae	Armillaria	Armillaria gallica	47427
tr|A0A2H3DHA7|A0A2H3DHA7_ARMGA	A0A2H3DHA7	NC	Pseudo	193		NA	1	0	p20[52:240]	301	No	No	Armillaria gallica	Basidiomycota	Eukaryota	Fungi	Basidiomycota	Agaricomycetes	Agaricales	Physalacriaceae	Armillaria	Armillaria gallica	47427
tr|A0A2H3DKP4|A0A2H3DKP4_ARMGA	A0A2H3DKP4	HS	Pseudo	156		NA	1	0	p20[7:162]	446	No	No	Armillaria gallica	Basidiomycota	Eukaryota	Fungi	Basidiomycota	Agaricomycetes	Agaricales	Physalacriaceae	Armillaria	Armillaria gallica	47427
tr|A0A2H3EJH4|A0A2H3EJH4_ARMGA	A0A2H3EJH4	HC	True	168		NA	1	0	p20[44:211]	300	No	No	Armillaria gallica	Basidiomycota	Eukaryota	Fungi	Basidiomycota	Agaricomycetes	Agaricales	Physalacriaceae	Armillaria	Armillaria gallica	47427
tr|A0A2H3DT83|A0A2H3DT83_ARMGA	A0A2H3DT83	HC	True	159		NA	1	0	p20[15:173]	287	No	No	Armillaria gallica	Basidiomycota	Eukaryota	Fungi	Basidiomycota	Agaricomycetes	Agaricales	Physalacriaceae	Armillaria	Armillaria gallica	47427
tr|A0A2H3D6G4|A0A2H3D6G4_ARMGA	A0A2H3D6G4	HC	True	171		NA	1	0	p20[4:174]	177	No	No	Armillaria gallica	Basidiomycota	Eukaryota	Fungi	Basidiomycota	Agaricomycetes	Agaricales	Physalacriaceae	Armillaria	Armillaria gallica	47427
tr|A0A2H3EWU7|A0A2H3EWU7_ARMGA	A0A2H3EWU7	HC	True	161		NA	1	0	p20[66:226]	777	No	No	Armillaria gallica	Basidiomycota	Eukaryota	Fungi	Basidiomycota	Agaricomycetes	Agaricales	Physalacriaceae	Armillaria	Armillaria gallica	47427
tr|A0A2H3EPB6|A0A2H3EPB6_ARMGA	A0A2H3EPB6	RC	Pseudo	144		NA	1	0	p20[3:146]	158	No	No	Armillaria gallica	Basidiomycota	Eukaryota	Fungi	Basidiomycota	Agaricomycetes	Agaricales	Physalacriaceae	Armillaria	Armillaria gallica	47427
tr|A0A2H3D2M6|A0A2H3D2M6_ARMGA	A0A2H3D2M6	AG	Pseudo	161		NA	1	0	p20[34:194]	311	No	No	Armillaria gallica	Basidiomycota	Eukaryota	Fungi	Basidiomycota	Agaricomycetes	Agaricales	Physalacriaceae	Armillaria	Armillaria gallica	47427
tr|A0A2H3DIJ3|A0A2H3DIJ3_ARMGA	A0A2H3DIJ3	HC	True	168		NA	1	0	p20[110:277]	399	No	No	Armillaria gallica	Basidiomycota	Eukaryota	Fungi	Basidiomycota	Agaricomycetes	Agaricales	Physalacriaceae	Armillaria	Armillaria gallica	47427
tr|A0A2H3D6Z1|A0A2H3D6Z1_ARMGA	A0A2H3D6Z1	HC	True	163		NA	1	0	p20[59:217]	325	No	No	Armillaria gallica	Basidiomycota	Eukaryota	Fungi	Basidiomycota	Agaricomycetes	Agaricales	Physalacriaceae	Armillaria	Armillaria gallica	47427
tr|A0A2H3DG02|A0A2H3DG02_ARMGA	A0A2H3DG02	HC	True	169		NA	1	0	p20[101:261]	356	No	No	Armillaria gallica	Basidiomycota	Eukaryota	Fungi	Basidiomycota	Agaricomycetes	Agaricales	Physalacriaceae	Armillaria	Armillaria gallica	47427
tr|A0A2H3CZH7|A0A2H3CZH7_ARMGA	A0A2H3CZH7	HC	True	191		NA	1	0	p20[24:211]	337	No	No	Armillaria gallica	Basidiomycota	Eukaryota	Fungi	Basidiomycota	Agaricomycetes	Agaricales	Physalacriaceae	Armillaria	Armillaria gallica	47427
tr|A0A2H3E293|A0A2H3E293_ARMGA	A0A2H3E293	YC	Pseudo	191		NA	1	0	p20[70:260]	392	No	No	Armillaria gallica	Basidiomycota	Eukaryota	Fungi	Basidiomycota	Agaricomycetes	Agaricales	Physalacriaceae	Armillaria	Armillaria gallica	47427
tr|A0A2H3CD64|A0A2H3CD64_ARMGA	A0A2H3CD64	HC	True	156		NA	1	0	p20[41:189]	307	No	No	Armillaria gallica	Basidiomycota	Eukaryota	Fungi	Basidiomycota	Agaricomycetes	Agaricales	Physalacriaceae	Armillaria	Armillaria gallica	47427
tr|A0A2H3E150|A0A2H3E150_ARMGA	A0A2H3E150	HC	True	159		NA	1	0	p20[2:160]	212	No	No	Armillaria gallica	Basidiomycota	Eukaryota	Fungi	Basidiomycota	Agaricomycetes	Agaricales	Physalacriaceae	Armillaria	Armillaria gallica	47427
tr|A0A2H3CN03|A0A2H3CN03_ARMGA	A0A2H3CN03	HS	Pseudo	163		NA	1	0	p20[69:230]	248	No	No	Armillaria gallica	Basidiomycota	Eukaryota	Fungi	Basidiomycota	Agaricomycetes	Agaricales	Physalacriaceae	Armillaria	Armillaria gallica	47427
tr|A0A2H3E652|A0A2H3E652_ARMGA	A0A2H3E652	HC	True	153		NA	1	0	p20[83:235]	305	No	No	Armillaria gallica	Basidiomycota	Eukaryota	Fungi	Basidiomycota	Agaricomycetes	Agaricales	Physalacriaceae	Armillaria	Armillaria gallica	47427
tr|A0A2H3D8G4|A0A2H3D8G4_ARMGA	A0A2H3D8G4	HC	True	170		NA	1	0	p20[166:332]	452	No	No	Armillaria gallica	Basidiomycota	Eukaryota	Fungi	Basidiomycota	Agaricomycetes	Agaricales	Physalacriaceae	Armillaria	Armillaria gallica	47427
tr|A0A2H3D5G1|A0A2H3D5G1_ARMGA	A0A2H3D5G1	HC	True	175		NA	1	0	p20[1:175]	178	No	No	Armillaria gallica	Basidiomycota	Eukaryota	Fungi	Basidiomycota	Agaricomycetes	Agaricales	Physalacriaceae	Armillaria	Armillaria gallica	47427
tr|A0A2H3DF56|A0A2H3DF56_ARMGA	A0A2H3DF56	HS	Pseudo	155		NA	1	0	p20[127:280]	410	No	No	Armillaria gallica	Basidiomycota	Eukaryota	Fungi	Basidiomycota	Agaricomycetes	Agaricales	Physalacriaceae	Armillaria	Armillaria gallica	47427
tr|A0A2H3CZE0|A0A2H3CZE0_ARMGA	A0A2H3CZE0	HC	True	182		NA	1	0	p20[135:313]	428	No	No	Armillaria gallica	Basidiomycota	Eukaryota	Fungi	Basidiomycota	Agaricomycetes	Agaricales	Physalacriaceae	Armillaria	Armillaria gallica	47427
tr|A0A2H3D8I1|A0A2H3D8I1_ARMGA	A0A2H3D8I1	HC	True	170		NA	1	0	p20[90:257]	381	No	No	Armillaria gallica	Basidiomycota	Eukaryota	Fungi	Basidiomycota	Agaricomycetes	Agaricales	Physalacriaceae	Armillaria	Armillaria gallica	47427
tr|A0A2H3CT36|A0A2H3CT36_ARMGA	A0A2H3CT36	HC	True	155		NA	1	0	p20[1:155]	160	No	No	Armillaria gallica	Basidiomycota	Eukaryota	Fungi	Basidiomycota	Agaricomycetes	Agaricales	Physalacriaceae	Armillaria	Armillaria gallica	47427
tr|A0A2H3CNP3|A0A2H3CNP3_ARMGA	A0A2H3CNP3	HC	True	172		NA	1	0	p20[20:184]	333	No	No	Armillaria gallica	Basidiomycota	Eukaryota	Fungi	Basidiomycota	Agaricomycetes	Agaricales	Physalacriaceae	Armillaria	Armillaria gallica	47427
tr|A0A2H3D1P9|A0A2H3D1P9_ARMGA	A0A2H3D1P9	HC	True	106		NA	1	0	p20[2:107]	241	No	No	Armillaria gallica	Basidiomycota	Eukaryota	Fungi	Basidiomycota	Agaricomycetes	Agaricales	Physalacriaceae	Armillaria	Armillaria gallica	47427
tr|A0A2H3D014|A0A2H3D014_ARMGA	A0A2H3D014	HC	True	168		NA	1	0	p20[51:218]	338	No	No	Armillaria gallica	Basidiomycota	Eukaryota	Fungi	Basidiomycota	Agaricomycetes	Agaricales	Physalacriaceae	Armillaria	Armillaria gallica	47427
tr|A0A2H3D0F1|A0A2H3D0F1_ARMGA	A0A2H3D0F1	HC	True	146		NA	1	0	p20[117:261]	343	No	No	Armillaria gallica	Basidiomycota	Eukaryota	Fungi	Basidiomycota	Agaricomycetes	Agaricales	Physalacriaceae	Armillaria	Armillaria gallica	47427
tr|A0A2H3D6W1|A0A2H3D6W1_ARMGA	A0A2H3D6W1	HC	True	173		NA	1	0	p20[25:197]	309	No	No	Armillaria gallica	Basidiomycota	Eukaryota	Fungi	Basidiomycota	Agaricomycetes	Agaricales	Physalacriaceae	Armillaria	Armillaria gallica	47427
tr|A0A2H3CV04|A0A2H3CV04_ARMGA	A0A2H3CV04	HC	True	150		NA	1	0	p20[1:150]	152	No	No	Armillaria gallica	Basidiomycota	Eukaryota	Fungi	Basidiomycota	Agaricomycetes	Agaricales	Physalacriaceae	Armillaria	Armillaria gallica	47427
tr|A0A2H3CCQ2|A0A2H3CCQ2_ARMGA	A0A2H3CCQ2	HC	True	158		NA	1	0	p20[58:215]	778	No	No	Armillaria gallica	Basidiomycota	Eukaryota	Fungi	Basidiomycota	Agaricomycetes	Agaricales	Physalacriaceae	Armillaria	Armillaria gallica	47427
tr|A0A2H3D3K3|A0A2H3D3K3_ARMGA	A0A2H3D3K3	HC	True	166		NA	1	0	p20[5:170]	170	No	No	Armillaria gallica	Basidiomycota	Eukaryota	Fungi	Basidiomycota	Agaricomycetes	Agaricales	Physalacriaceae	Armillaria	Armillaria gallica	47427
tr|A0A2H3CT20|A0A2H3CT20_ARMGA	A0A2H3CT20	HC	True	151		NA	1	0	p20[2:152]	272	No	No	Armillaria gallica	Basidiomycota	Eukaryota	Fungi	Basidiomycota	Agaricomycetes	Agaricales	Physalacriaceae	Armillaria	Armillaria gallica	47427
tr|A0A2H3CXZ1|A0A2H3CXZ1_ARMGA	A0A2H3CXZ1	HC	True	199		NA	1	0	p20[1:199]	258	No	No	Armillaria gallica	Basidiomycota	Eukaryota	Fungi	Basidiomycota	Agaricomycetes	Agaricales	Physalacriaceae	Armillaria	Armillaria gallica	47427
tr|A0A2H3E3A0|A0A2H3E3A0_ARMGA	A0A2H3E3A0	HC	True	137		NA	1	0	p20[22:149]	271	No	No	Armillaria gallica	Basidiomycota	Eukaryota	Fungi	Basidiomycota	Agaricomycetes	Agaricales	Physalacriaceae	Armillaria	Armillaria gallica	47427
tr|A0A2H3D6J0|A0A2H3D6J0_ARMGA	A0A2H3D6J0	HC	True	171		NA	1	0	p20[13:183]	214	No	No	Armillaria gallica	Basidiomycota	Eukaryota	Fungi	Basidiomycota	Agaricomycetes	Agaricales	Physalacriaceae	Armillaria	Armillaria gallica	47427
tr|A0A2H3EA83|A0A2H3EA83_ARMGA	A0A2H3EA83	HC	True	155		NA	1	0	p20[91:245]	782	No	No	Armillaria gallica	Basidiomycota	Eukaryota	Fungi	Basidiomycota	Agaricomycetes	Agaricales	Physalacriaceae	Armillaria	Armillaria gallica	47427
tr|A0A2H3CE56|A0A2H3CE56_ARMGA	A0A2H3CE56	HC	True	184		NA	1	0	p20[24:207]	359	No	No	Armillaria gallica	Basidiomycota	Eukaryota	Fungi	Basidiomycota	Agaricomycetes	Agaricales	Physalacriaceae	Armillaria	Armillaria gallica	47427
tr|A0A2H3E6Y1|A0A2H3E6Y1_ARMGA	A0A2H3E6Y1	HC	True	166		NA	1	0	p20[43:207]	503	No	No	Armillaria gallica	Basidiomycota	Eukaryota	Fungi	Basidiomycota	Agaricomycetes	Agaricales	Physalacriaceae	Armillaria	Armillaria gallica	47427
tr|A0A2H3D5K7|A0A2H3D5K7_ARMGA	A0A2H3D5K7	HC	True	155		NA	1	0	p20[172:326]	371	No	No	Armillaria gallica	Basidiomycota	Eukaryota	Fungi	Basidiomycota	Agaricomycetes	Agaricales	Physalacriaceae	Armillaria	Armillaria gallica	47427
tr|A0A2H3ED73|A0A2H3ED73_ARMGA	A0A2H3ED73	HC	True	177		NA	1	0	p20[129:305]	421	No	No	Armillaria gallica	Basidiomycota	Eukaryota	Fungi	Basidiomycota	Agaricomycetes	Agaricales	Physalacriaceae	Armillaria	Armillaria gallica	47427
tr|A0A2H3EA19|A0A2H3EA19_ARMGA	A0A2H3EA19	HC	True	174		NA	1	0	p20[119:292]	410	No	No	Armillaria gallica	Basidiomycota	Eukaryota	Fungi	Basidiomycota	Agaricomycetes	Agaricales	Physalacriaceae	Armillaria	Armillaria gallica	47427
tr|A0A2H3DRF9|A0A2H3DRF9_ARMGA	A0A2H3DRF9	HC	True	187		NA	1	0	p20[13:195]	313	No	No	Armillaria gallica	Basidiomycota	Eukaryota	Fungi	Basidiomycota	Agaricomycetes	Agaricales	Physalacriaceae	Armillaria	Armillaria gallica	47427
tr|A0A2H3CIS1|A0A2H3CIS1_ARMGA	A0A2H3CIS1	HC	True	163		NA	1	0	p20[1:157]	192	No	No	Armillaria gallica	Basidiomycota	Eukaryota	Fungi	Basidiomycota	Agaricomycetes	Agaricales	Physalacriaceae	Armillaria	Armillaria gallica	47427
tr|A0A2H3D6V4|A0A2H3D6V4_ARMGA	A0A2H3D6V4	HG	Pseudo	184		NA	1	0	p20[116:299]	329	No	No	Armillaria gallica	Basidiomycota	Eukaryota	Fungi	Basidiomycota	Agaricomycetes	Agaricales	Physalacriaceae	Armillaria	Armillaria gallica	47427
tr|A0A2H3CWT4|A0A2H3CWT4_ARMGA	A0A2H3CWT4	HS	Pseudo	183		NA	1	0	p20[115:297]	397	No	No	Armillaria gallica	Basidiomycota	Eukaryota	Fungi	Basidiomycota	Agaricomycetes	Agaricales	Physalacriaceae	Armillaria	Armillaria gallica	47427
tr|A0A2H3CVF2|A0A2H3CVF2_ARMGA	A0A2H3CVF2	HC	True	171		NA	1	0	p20[2:172]	175	No	No	Armillaria gallica	Basidiomycota	Eukaryota	Fungi	Basidiomycota	Agaricomycetes	Agaricales	Physalacriaceae	Armillaria	Armillaria gallica	47427
tr|A0A371D438|A0A371D438_9APHY	A0A371D438	HC	True	171		NA	1	0	p20[12:182]	326	No	No	Polyporus brumalis	Basidiomycota	Eukaryota	Fungi	Basidiomycota	Agaricomycetes	Polyporales	Polyporaceae	Polyporus	Polyporus brumalis	139420
tr|A0A371CRL5|A0A371CRL5_9APHY	A0A371CRL5	RC	Pseudo	155		NA	1	0	p20[41:195]	231	No	No	Polyporus brumalis	Basidiomycota	Eukaryota	Fungi	Basidiomycota	Agaricomycetes	Polyporales	Polyporaceae	Polyporus	Polyporus brumalis	139420
tr|A0A371D613|A0A371D613_9APHY	A0A371D613	HC	True	158		NA	1	0	p20[7:163]	659	No	No	Polyporus brumalis	Basidiomycota	Eukaryota	Fungi	Basidiomycota	Agaricomycetes	Polyporales	Polyporaceae	Polyporus	Polyporus brumalis	139420
tr|A0A371D434|A0A371D434_9APHY	A0A371D434	HC	True	186		NA	1	0	p20[2:187]	338	No	No	Polyporus brumalis	Basidiomycota	Eukaryota	Fungi	Basidiomycota	Agaricomycetes	Polyporales	Polyporaceae	Polyporus	Polyporus brumalis	139420
tr|A0A1S9DHX5|A0A1S9DHX5_ASPOZ	A0A1S9DHX5	HC	True	145		NA	1	0	p20[4:148]	919	No	No	Aspergillus oryzae	Ascomycota	Eukaryota	Fungi	Ascomycota	Eurotiomycetes	Eurotiales	Aspergillaceae	Aspergillus	Aspergillus oryzae	5062
tr|A0A364LWH3|A0A364LWH3_ASPFL	A0A364LWH3	HC	True	145		NA	1	0	p20[4:148]	813	No	No	Aspergillus flavus	Ascomycota	Eukaryota	Fungi	Ascomycota	Eurotiomycetes	Eurotiales	Aspergillaceae	Aspergillus	Aspergillus flavus	5059
tr|S7RMG5|S7RMG5_GLOTA	S7RMG5	HC	True	161		NA	1	0	p20[12:172]	232	No	No	Gloeophyllum trabeum ATCC 11539	Basidiomycota	Eukaryota	Fungi	Basidiomycota	Agaricomycetes	Gloeophyllales	Gloeophyllaceae	Gloeophyllum	Gloeophyllum trabeum	670483
tr|Q2U4N0|Q2U4N0_ASPOR	Q2U4N0	HC	True	153		NA	1	0	p20[4:156]	822	No	No	Aspergillus oryzae RIB40	Ascomycota	Eukaryota	Fungi	Ascomycota	Eurotiomycetes	Eurotiales	Aspergillaceae	Aspergillus	Aspergillus oryzae	510516
tr|S7PXV4|S7PXV4_GLOTA	S7PXV4	HC	True	172		NA	1	0	p20[9:180]	183	No	No	Gloeophyllum trabeum ATCC 11539	Basidiomycota	Eukaryota	Fungi	Basidiomycota	Agaricomycetes	Gloeophyllales	Gloeophyllaceae	Gloeophyllum	Gloeophyllum trabeum	670483
tr|S7RVD4|S7RVD4_GLOTA	S7RVD4	HC	True	153		NA	1	0	p20[7:159]	618	No	No	Gloeophyllum trabeum ATCC 11539	Basidiomycota	Eukaryota	Fungi	Basidiomycota	Agaricomycetes	Gloeophyllales	Gloeophyllaceae	Gloeophyllum	Gloeophyllum trabeum	670483
tr|S7RJF5|S7RJF5_GLOTA	S7RJF5	HC	True	165		NA	1	0	p20[20:180]	422	No	No	Gloeophyllum trabeum ATCC 11539	Basidiomycota	Eukaryota	Fungi	Basidiomycota	Agaricomycetes	Gloeophyllales	Gloeophyllaceae	Gloeophyllum	Gloeophyllum trabeum	670483
tr|A0A024R3Y3|A0A024R3Y3_HUMAN	A0A024R3Y3	RV	Pseudo	118		NA	1	0	p20[227:343]	445	No	No	Homo sapiens	Chordata	Eukaryota	Metazoa	Chordata	Mammalia	Primates	Hominidae	Homo	Homo sapiens	9606
tr|D3DXD8|D3DXD8_HUMAN	D3DXD8	HC	True	127		NA	1	0	p20[200:326]	343	No	No	Homo sapiens	Chordata	Eukaryota	Metazoa	Chordata	Mammalia	Primates	Hominidae	Homo	Homo sapiens	9606
tr|A0A024R3Z7|A0A024R3Z7_HUMAN	A0A024R3Z7	RV	Pseudo	118		NA	1	0	p20[262:378]	480	No	No	Homo sapiens	Chordata	Eukaryota	Metazoa	Chordata	Mammalia	Primates	Hominidae	Homo	Homo sapiens	9606
tr|D3DXD9|D3DXD9_HUMAN	D3DXD9	HC	True	127		NA	1	0	p20[169:295]	312	No	No	Homo sapiens	Chordata	Eukaryota	Metazoa	Chordata	Mammalia	Primates	Hominidae	Homo	Homo sapiens	9606
tr|B4DVD8|B4DVD8_HUMAN	B4DVD8	HC	True	162		NA	1	0	p20[124:285]	301	No	No	Homo sapiens	Chordata	Eukaryota	Metazoa	Chordata	Mammalia	Primates	Hominidae	Homo	Homo sapiens	9606
tr|A0A336TY74|A0A336TY74_HUMAN	A0A336TY74	RV	Pseudo	118		NA	1	0	p20[262:378]	462	No	No	Homo sapiens	Chordata	Eukaryota	Metazoa	Chordata	Mammalia	Primates	Hominidae	Homo	Homo sapiens	9606
tr|Q5SVL2|Q5SVL2_HUMAN	Q5SVL2	HC	True	138		NA	1	0	p20[68:204]	222	No	No	Homo sapiens	Chordata	Eukaryota	Metazoa	Chordata	Mammalia	Primates	Hominidae	Homo	Homo sapiens	9606
tr|B4E361|B4E361_HUMAN	B4E361	RV	Pseudo	115		NA	1	0	p20[166:279]	366	No	No	Homo sapiens	Chordata	Eukaryota	Metazoa	Chordata	Mammalia	Primates	Hominidae	Homo	Homo sapiens	9606
tr|A0A0A0MR92|A0A0A0MR92_HUMAN	A0A0A0MR92	RV	Pseudo	119		NA	1	0	p20[148:265]	321	No	No	Homo sapiens	Chordata	Eukaryota	Metazoa	Chordata	Mammalia	Primates	Hominidae	Homo	Homo sapiens	9606
tr|A0A2P9ASN4|A0A2P9ASN4_HUMAN	A0A2P9ASN4	HC	True	139		NA	1	0	p20[38:176]	479	No	No	Homo sapiens	Chordata	Eukaryota	Metazoa	Chordata	Mammalia	Primates	Hominidae	Homo	Homo sapiens	9606
tr|Q5JRU2|Q5JRU2_HUMAN	Q5JRU2	HC	True	148		NA	1	0	p20[78:222]	266	No	No	Homo sapiens	Chordata	Eukaryota	Metazoa	Chordata	Mammalia	Primates	Hominidae	Homo	Homo sapiens	9606
tr|A0A2P9AKU4|A0A2P9AKU4_HUMAN	A0A2P9AKU4	HC	True	145		NA	1	0	p20[27:164]	850	No	No	Homo sapiens	Chordata	Eukaryota	Metazoa	Chordata	Mammalia	Primates	Hominidae	Homo	Homo sapiens	9606
tr|A8K5S1|A8K5S1_HUMAN	A8K5S1	HC	True	132		NA	1	0	p20[343:474]	824	No	Yes	Homo sapiens	Chordata	Eukaryota	Metazoa	Chordata	Mammalia	Primates	Hominidae	Homo	Homo sapiens	9606
tr|B2FWR4|B2FWR4_ANOAR	B2FWR4	HC	True	129		NA	1	0	p20[1:128]	164	No	No	Anopheles arabiensis	Arthropoda	Eukaryota	Metazoa	Arthropoda	Insecta	Diptera	Culicidae	Anopheles	Anopheles arabiensis	7173
tr|B2FWQ9|B2FWQ9_ANOAR	B2FWQ9	HC	True	129		NA	1	0	p20[1:128]	164	No	No	Anopheles arabiensis	Arthropoda	Eukaryota	Metazoa	Arthropoda	Insecta	Diptera	Culicidae	Anopheles	Anopheles arabiensis	7173
tr|A0A182HDE6|A0A182HDE6_AEDAL	A0A182HDE6	HS	Pseudo	135		NA	1	0	p20[43:176]	273	No	No	Aedes albopictus	Arthropoda	Eukaryota	Metazoa	Arthropoda	Insecta	Diptera	Culicidae	Aedes	Aedes albopictus	7160
tr|I1VB02|I1VB02_DAPPU	I1VB02	HC	True	128		NA	1	0	p20[39:166]	170	No	No	Daphnia pulex	Arthropoda	Eukaryota	Metazoa	Arthropoda	Branchiopoda	Diplostraca	Daphniidae	Daphnia	Daphnia pulex	6669
tr|I1VB38|I1VB38_DAPPU	I1VB38	HC	True	118		NA	1	0	p20[12:129]	195	No	No	Daphnia pulex	Arthropoda	Eukaryota	Metazoa	Arthropoda	Branchiopoda	Diplostraca	Daphniidae	Daphnia	Daphnia pulex	6669
tr|I1VAX4|I1VAX4_DAPPU	I1VAX4	HC	True	113		NA	1	0	p20[4:116]	121	No	No	Daphnia pulex	Arthropoda	Eukaryota	Metazoa	Arthropoda	Branchiopoda	Diplostraca	Daphniidae	Daphnia	Daphnia pulex	6669
tr|A0A182HEL8|A0A182HEL8_AEDAL	A0A182HEL8	HC	True	125		NA	1	0	p20[8:132]	154	No	No	Aedes albopictus	Arthropoda	Eukaryota	Metazoa	Arthropoda	Insecta	Diptera	Culicidae	Aedes	Aedes albopictus	7160
tr|A0A182GYM4|A0A182GYM4_AEDAL	A0A182GYM4	HC	True	150		NA	1	0	p20[208:357]	450	No	No	Aedes albopictus	Arthropoda	Eukaryota	Metazoa	Arthropoda	Insecta	Diptera	Culicidae	Aedes	Aedes albopictus	7160
tr|A0A182G4X1|A0A182G4X1_AEDAL	A0A182G4X1	HS	Pseudo	135		NA	1	0	p20[43:176]	273	No	No	Aedes albopictus	Arthropoda	Eukaryota	Metazoa	Arthropoda	Insecta	Diptera	Culicidae	Aedes	Aedes albopictus	7160
tr|A0A182GZB2|A0A182GZB2_AEDAL	A0A182GZB2	HC	True	153		NA	1	0	p20[188:340]	384	No	No	Aedes albopictus	Arthropoda	Eukaryota	Metazoa	Arthropoda	Insecta	Diptera	Culicidae	Aedes	Aedes albopictus	7160
tr|A0A182GZB1|A0A182GZB1_AEDAL	A0A182GZB1	HC	True	132		NA	1	0	p20[163:282]	389	No	No	Aedes albopictus	Arthropoda	Eukaryota	Metazoa	Arthropoda	Insecta	Diptera	Culicidae	Aedes	Aedes albopictus	7160
tr|A0A293N044|A0A293N044_ORNER	A0A293N044	HC	True	162		NA	1	0	p20[13:167]	252	No	No	Ornithodoros erraticus	Arthropoda	Eukaryota	Metazoa	Arthropoda	Arachnida	Ixodida	Argasidae	Ornithodoros	Ornithodoros erraticus	265619
tr|Q7Q2Q0|Q7Q2Q0_ANOGA	Q7Q2Q0	HC	True	147		NA	1	0	p20[183:329]	430	No	No	Anopheles gambiae	Arthropoda	Eukaryota	Metazoa	Arthropoda	Insecta	Diptera	Culicidae	Anopheles	Anopheles gambiae	7165
tr|Q7QGM9|Q7QGM9_ANOGA	Q7QGM9	HC	True	141		NA	1	0	p20[37:177]	254	No	No	Anopheles gambiae	Arthropoda	Eukaryota	Metazoa	Arthropoda	Insecta	Diptera	Culicidae	Anopheles	Anopheles gambiae	7165
tr|F6TBD6|F6TBD6_CIOIN	F6TBD6	HC	True	133		NA	1	0	p20[41:164]	279	No	No	Ciona intestinalis	Chordata	Eukaryota	Metazoa	Chordata	Ascidiacea	Enterogona	Cionidae	Ciona	Ciona intestinalis	7719
tr|A0A0A9WWC3|A0A0A9WWC3_LYGHE	A0A0A9WWC3	HC	True	129		NA	1	0	p20[23:151]	271	No	No	Lygus hesperus	Arthropoda	Eukaryota	Metazoa	Arthropoda	Insecta	Hemiptera	Miridae	Lygus	Lygus hesperus	30085
tr|A0A0A9WBG7|A0A0A9WBG7_LYGHE	A0A0A9WBG7	HC	True	129		NA	1	0	p20[107:235]	355	No	No	Lygus hesperus	Arthropoda	Eukaryota	Metazoa	Arthropoda	Insecta	Hemiptera	Miridae	Lygus	Lygus hesperus	30085
tr|B2FWR7|B2FWR7_ANOGA	B2FWR7	HC	True	131		NA	1	0	p20[1:130]	164	No	No	Anopheles gambiae	Arthropoda	Eukaryota	Metazoa	Arthropoda	Insecta	Diptera	Culicidae	Anopheles	Anopheles gambiae	7165
tr|Q7QGN0|Q7QGN0_ANOGA	Q7QGN0	HC	True	141		NA	1	0	p20[22:162]	239	No	No	Anopheles gambiae	Arthropoda	Eukaryota	Metazoa	Arthropoda	Insecta	Diptera	Culicidae	Anopheles	Anopheles gambiae	7165
tr|A0A0A9W4I7|A0A0A9W4I7_LYGHE	A0A0A9W4I7	YS	Pseudo	143		NA	1	0	p20[92:234]	361	No	No	Lygus hesperus	Arthropoda	Eukaryota	Metazoa	Arthropoda	Insecta	Hemiptera	Miridae	Lygus	Lygus hesperus	30085
tr|F6UYE6|F6UYE6_CIOIN	F6UYE6	HC	True	145		NA	1	0	p20[243:387]	526	No	No	Ciona intestinalis	Chordata	Eukaryota	Metazoa	Chordata	Ascidiacea	Enterogona	Cionidae	Ciona	Ciona intestinalis	7719
tr|H2Y3Q9|H2Y3Q9_CIOIN	H2Y3Q9	HC	True	144		NA	1	0	p20[262:405]	624	No	Yes	Ciona intestinalis	Chordata	Eukaryota	Metazoa	Chordata	Ascidiacea	Enterogona	Cionidae	Ciona	Ciona intestinalis	7719
tr|B2FWS0|B2FWS0_ANOGA	B2FWS0	HC	True	131		NA	1	0	p20[1:130]	164	No	No	Anopheles gambiae	Arthropoda	Eukaryota	Metazoa	Arthropoda	Insecta	Diptera	Culicidae	Anopheles	Anopheles gambiae	7165
tr|B2FWS8|B2FWS8_ANOGA	B2FWS8	HC	True	128		NA	1	0	p20[1:127]	164	No	No	Anopheles gambiae	Arthropoda	Eukaryota	Metazoa	Arthropoda	Insecta	Diptera	Culicidae	Anopheles	Anopheles gambiae	7165
tr|A0A0A9Y848|A0A0A9Y848_LYGHE	A0A0A9Y848	YS	Pseudo	143		NA	1	0	p20[64:206]	333	No	No	Lygus hesperus	Arthropoda	Eukaryota	Metazoa	Arthropoda	Insecta	Hemiptera	Miridae	Lygus	Lygus hesperus	30085
tr|B2FWT0|B2FWT0_ANOGA	B2FWT0	HC	True	129		NA	1	0	p20[1:128]	164	No	No	Anopheles gambiae	Arthropoda	Eukaryota	Metazoa	Arthropoda	Insecta	Diptera	Culicidae	Anopheles	Anopheles gambiae	7165
tr|A0A0A9Y0H9|A0A0A9Y0H9_LYGHE	A0A0A9Y0H9	HC	True	136		NA	1	0	p20[79:214]	253	No	No	Lygus hesperus	Arthropoda	Eukaryota	Metazoa	Arthropoda	Insecta	Hemiptera	Miridae	Lygus	Lygus hesperus	30085
tr|A0A1B6E4V5|A0A1B6E4V5_9HEMI	A0A1B6E4V5	HC	True	140		NA	1	0	p20[130:268]	366	No	No	Clastoptera arizonana	Arthropoda	Eukaryota	Metazoa	Arthropoda	Insecta	Hemiptera	Clastopteridae	Clastoptera	Clastoptera arizonana	38151
tr|B7QAN7|B7QAN7_IXOSC	B7QAN7	HC	True	130		NA	1	0	p20[30:159]	283	No	No	Ixodes scapularis	Arthropoda	Eukaryota	Metazoa	Arthropoda	Arachnida	Ixodida	Ixodidae	Ixodes	Ixodes scapularis	6945
tr|B7QNZ9|B7QNZ9_IXOSC	B7QNZ9	CF	Pseudo	112		NA	1	0	p20[9:120]	228	No	No	Ixodes scapularis	Arthropoda	Eukaryota	Metazoa	Arthropoda	Arachnida	Ixodida	Ixodidae	Ixodes	Ixodes scapularis	6945
tr|A0A090KVA4|A0A090KVA4_STRRB	A0A090KVA4	HC	True	130		NA	1	0	p20[230:359]	609	No	No	Strongyloides ratti	Nematoda	Eukaryota	Metazoa	Nematoda	Chromadorea	Rhabditida	Strongyloididae	Strongyloides	Strongyloides ratti	34506
tr|G5EG87|G5EG87_CAEEL	G5EG87	HC	True	124		NA	1	0	p20[252:375]	639	No	No	Caenorhabditis elegans	Nematoda	Eukaryota	Metazoa	Nematoda	Chromadorea	Rhabditida	Rhabditidae	Caenorhabditis	Caenorhabditis elegans	6239
tr|A0A016WNP8|A0A016WNP8_9BILA	A0A016WNP8	HC	True	124		NA	1	0	p20[257:380]	639	No	No	Ancylostoma ceylanicum	Nematoda	Eukaryota	Metazoa	Nematoda	Chromadorea	Rhabditida	Ancylostomatidae	Ancylostoma	Ancylostoma ceylanicum	53326
tr|B7P995|B7P995_IXOSC	B7P995	HC	True	125		NA	1	0	p20[154:278]	512	No	Yes	Ixodes scapularis	Arthropoda	Eukaryota	Metazoa	Arthropoda	Arachnida	Ixodida	Ixodidae	Ixodes	Ixodes scapularis	6945
tr|A0A2A2JFT5|A0A2A2JFT5_9BILA	A0A2A2JFT5	HC	True	131		NA	1	0	p20[284:414]	486	No	No	Diploscapter pachys	Nematoda	Eukaryota	Metazoa	Nematoda	Chromadorea	Rhabditida	Rhabditidae	Diploscapter	Diploscapter pachys	2018661
tr|A0A2A2KUI0|A0A2A2KUI0_9BILA	A0A2A2KUI0	HC	True	135		NA	1	0	p20[158:291]	365	No	No	Diploscapter pachys	Nematoda	Eukaryota	Metazoa	Nematoda	Chromadorea	Rhabditida	Rhabditidae	Diploscapter	Diploscapter pachys	2018661
tr|A0A2A2KFZ2|A0A2A2KFZ2_9BILA	A0A2A2KFZ2	HC	True	131		NA	1	0	p20[407:536]	778	No	No	Diploscapter pachys	Nematoda	Eukaryota	Metazoa	Nematoda	Chromadorea	Rhabditida	Rhabditidae	Diploscapter	Diploscapter pachys	2018661
tr|A0A2A2L2P2|A0A2A2L2P2_9BILA	A0A2A2L2P2	HC	True	123		NA	1	0	p20[570:692]	692	No	No	Diploscapter pachys	Nematoda	Eukaryota	Metazoa	Nematoda	Chromadorea	Rhabditida	Rhabditidae	Diploscapter	Diploscapter pachys	2018661
tr|Q178B7|Q178B7_AEDAE	Q178B7	HC	True	173		NA	1	0	p20[181:353]	391	No	No	Aedes aegypti	Arthropoda	Eukaryota	Metazoa	Arthropoda	Insecta	Diptera	Culicidae	Aedes	Aedes aegypti	7159
tr|A0A084WBG7|A0A084WBG7_ANOSI	A0A084WBG7	HC	True	118		NA	1	0	p20[287:404]	806	No	No	Anopheles sinensis	Arthropoda	Eukaryota	Metazoa	Arthropoda	Insecta	Diptera	Culicidae	Anopheles	Anopheles sinensis	74873
tr|Q178B8|Q178B8_AEDAE	Q178B8	HC	True	144		NA	1	0	p20[30:165]	267	No	No	Aedes aegypti	Arthropoda	Eukaryota	Metazoa	Arthropoda	Insecta	Diptera	Culicidae	Aedes	Aedes aegypti	7159
tr|A7J0I9|A7J0I9_PENMO	A7J0I9	HC	True	141		NA	1	0	p20[70:210]	317	No	No	Penaeus monodon	Arthropoda	Eukaryota	Metazoa	Arthropoda	Malacostraca	Decapoda	Penaeidae	Penaeus	Penaeus monodon	6687
tr|A0A084VYZ9|A0A084VYZ9_ANOSI	A0A084VYZ9	HC	True	133		NA	1	0	p20[18:150]	179	No	No	Anopheles sinensis	Arthropoda	Eukaryota	Metazoa	Arthropoda	Insecta	Diptera	Culicidae	Anopheles	Anopheles sinensis	74873
tr|A0A084W662|A0A084W662_ANOSI	A0A084W662	HC	True	148		NA	1	0	p20[123:269]	275	No	No	Anopheles sinensis	Arthropoda	Eukaryota	Metazoa	Arthropoda	Insecta	Diptera	Culicidae	Anopheles	Anopheles sinensis	74873
tr|A0A084WAJ9|A0A084WAJ9_ANOSI	A0A084WAJ9	HC	True	143		NA	1	0	p20[158:300]	410	No	No	Anopheles sinensis	Arthropoda	Eukaryota	Metazoa	Arthropoda	Insecta	Diptera	Culicidae	Anopheles	Anopheles sinensis	74873
tr|Q178B6|Q178B6_AEDAE	Q178B6	HC	True	173		NA	1	0	p20[177:348]	387	No	No	Aedes aegypti	Arthropoda	Eukaryota	Metazoa	Arthropoda	Insecta	Diptera	Culicidae	Aedes	Aedes aegypti	7159
tr|J9HYQ1|J9HYQ1_AEDAE	J9HYQ1	HC	True	122		NA	1	0	p20[266:387]	479	No	No	Aedes aegypti	Arthropoda	Eukaryota	Metazoa	Arthropoda	Insecta	Diptera	Culicidae	Aedes	Aedes aegypti	7159
tr|E0VT85|E0VT85_PEDHC	E0VT85	HC	True	163		NA	1	0	p20[252:414]	467	No	No	Pediculus humanus corporis	Arthropoda	Eukaryota	Metazoa	Arthropoda	Insecta	Phthiraptera	Pediculidae	Pediculus	Pediculus humanus	121224
tr|A0A122IG78|A0A122IG78_PLABE	A0A122IG78	HP	Pseudo	149		NA	1	0	p20[325:473]	595	No	No	Plasmodium berghei	Apicomplexa	Eukaryota	NA	Apicomplexa	Aconoidasida	Haemosporida	Plasmodiidae	Plasmodium	Plasmodium berghei	5821
tr|E0W1C4|E0W1C4_PEDHC	E0W1C4	HC	True	137		NA	1	0	p20[248:384]	523	No	No	Pediculus humanus corporis	Arthropoda	Eukaryota	Metazoa	Arthropoda	Insecta	Phthiraptera	Pediculidae	Pediculus	Pediculus humanus	121224
tr|A0A122IMU6|A0A122IMU6_PLABE	A0A122IMU6	YT	Pseudo	137		NA	1	0	p20[1255:1390]	1726	No	No	Plasmodium berghei	Apicomplexa	Eukaryota	NA	Apicomplexa	Aconoidasida	Haemosporida	Plasmodiidae	Plasmodium	Plasmodium berghei	5821
tr|A0A1C6WZZ9|A0A1C6WZZ9_PLABE	A0A1C6WZZ9	YT	Pseudo	137		NA	1	0	p20[1255:1390]	1726	No	No	Plasmodium berghei	Apicomplexa	Eukaryota	NA	Apicomplexa	Aconoidasida	Haemosporida	Plasmodiidae	Plasmodium	Plasmodium berghei	5821
tr|A0A336MEI7|A0A336MEI7_CULSO	A0A336MEI7	HC	True	131		NA	1	0	p20[278:408]	526	No	No	Culicoides sonorensis	Arthropoda	Eukaryota	Metazoa	Arthropoda	Insecta	Diptera	Ceratopogonidae	Culicoides	Culicoides sonorensis	179676
tr|A0A336LZC4|A0A336LZC4_CULSO	A0A336LZC4	HC	True	115		NA	1	0	p20[67:180]	608	No	No	Culicoides sonorensis	Arthropoda	Eukaryota	Metazoa	Arthropoda	Insecta	Diptera	Ceratopogonidae	Culicoides	Culicoides sonorensis	179676
tr|B0W757|B0W757_CULQU	B0W757	HC	True	123		NA	1	0	p20[201:322]	417	No	No	Culex quinquefasciatus	Arthropoda	Eukaryota	Metazoa	Arthropoda	Insecta	Diptera	Culicidae	Culex	Culex quinquefasciatus	7176
tr|B0WZJ4|B0WZJ4_CULQU	B0WZJ4	HC	True	133		NA	1	0	p20[172:304]	359	No	No	Culex quinquefasciatus	Arthropoda	Eukaryota	Metazoa	Arthropoda	Insecta	Diptera	Culicidae	Culex	Culex quinquefasciatus	7176
tr|B0WM91|B0WM91_CULQU	B0WM91	HC	True	137		NA	1	0	p20[101:236]	273	No	No	Culex quinquefasciatus	Arthropoda	Eukaryota	Metazoa	Arthropoda	Insecta	Diptera	Culicidae	Culex	Culex quinquefasciatus	7176
tr|B0WL97|B0WL97_CULQU	B0WL97	HC	True	189		NA	1	0	p20[190:267]	296	No	No	Culex quinquefasciatus	Arthropoda	Eukaryota	Metazoa	Arthropoda	Insecta	Diptera	Culicidae	Culex	Culex quinquefasciatus	7176
tr|A0A336MYX8|A0A336MYX8_CULSO	A0A336MYX8	YC	Pseudo	125		NA	1	0	p20[280:404]	522	No	No	Culicoides sonorensis	Arthropoda	Eukaryota	Metazoa	Arthropoda	Insecta	Diptera	Ceratopogonidae	Culicoides	Culicoides sonorensis	179676
tr|A0A1S3HGM7|A0A1S3HGM7_LINUN	A0A1S3HGM7	HC	True	156		NA	1	0	p20[354:509]	1077	No	No	Lingula anatina	Brachiopoda	Eukaryota	Metazoa	Brachiopoda	Lingulata	Lingulida	Lingulidae	Lingula	Lingula anatina	7574
tr|A0A1I7VWX2|A0A1I7VWX2_LOALO	A0A1I7VWX2	HC	True	126		NA	1	0	p20[268:393]	648	No	No	Loa loa	Nematoda	Eukaryota	Metazoa	Nematoda	Chromadorea	Rhabditida	Onchocercidae	Loa	Loa loa	7209
tr|A0A077Y6E8|A0A077Y6E8_9APIC	A0A077Y6E8	HP	Pseudo	149		NA	1	0	p20[327:475]	600	No	No	Plasmodium yoelii	Apicomplexa	Eukaryota	NA	Apicomplexa	Aconoidasida	Haemosporida	Plasmodiidae	Plasmodium	Plasmodium yoelii	5861
tr|A0A1S3IDD6|A0A1S3IDD6_LINUN	A0A1S3IDD6	HC	True	136		NA	1	0	p20[286:421]	554	No	No	Lingula anatina	Brachiopoda	Eukaryota	Metazoa	Brachiopoda	Lingulata	Lingulida	Lingulidae	Lingula	Lingula anatina	7574
tr|R7U4D6|R7U4D6_CAPTE	R7U4D6	HC	True	122		NA	1	0	p20[8:129]	130	No	No	Capitella teleta	Annelida	Eukaryota	Metazoa	Annelida	Polychaeta	Capitellida	Capitellidae	Capitella	Capitella teleta	283909
tr|R7TWP8|R7TWP8_CAPTE	R7TWP8	HC	True	133		NA	1	0	p20[66:198]	1163	No	No	Capitella teleta	Annelida	Eukaryota	Metazoa	Annelida	Polychaeta	Capitellida	Capitellidae	Capitella	Capitella teleta	283909
tr|R7V0F1|R7V0F1_CAPTE	R7V0F1	HC	True	158		NA	1	0	p20[11:168]	305	No	No	Capitella teleta	Annelida	Eukaryota	Metazoa	Annelida	Polychaeta	Capitellida	Capitellidae	Capitella	Capitella teleta	283909
tr|R7UI35|R7UI35_CAPTE	R7UI35	HC	True	123		NA	1	0	p20[13:135]	137	No	No	Capitella teleta	Annelida	Eukaryota	Metazoa	Annelida	Polychaeta	Capitellida	Capitellidae	Capitella	Capitella teleta	283909
tr|R7VA21|R7VA21_CAPTE	R7VA21	HC	True	122		NA	1	0	p20[4:125]	125	No	No	Capitella teleta	Annelida	Eukaryota	Metazoa	Annelida	Polychaeta	Capitellida	Capitellidae	Capitella	Capitella teleta	283909
tr|R7UFF5|R7UFF5_CAPTE	R7UFF5	HC	True	123		NA	1	0	p20[13:135]	143	No	No	Capitella teleta	Annelida	Eukaryota	Metazoa	Annelida	Polychaeta	Capitellida	Capitellidae	Capitella	Capitella teleta	283909
tr|A0A0P4W1D8|A0A0P4W1D8_9EUCA	A0A0P4W1D8	HC	True	133		NA	1	0	p20[35:167]	256	No	No	Scylla olivacea	Arthropoda	Eukaryota	Metazoa	Arthropoda	Malacostraca	Decapoda	Portunidae	Scylla	Scylla olivacea	85551
tr|R7UB03|R7UB03_CAPTE	R7UB03	HC	True	131		NA	1	0	p20[145:274]	322	No	No	Capitella teleta	Annelida	Eukaryota	Metazoa	Annelida	Polychaeta	Capitellida	Capitellidae	Capitella	Capitella teleta	283909
tr|A0A1I8GTI1|A0A1I8GTI1_9PLAT	A0A1I8GTI1	HC	True	135		NA	1	0	p20[23:157]	285	No	No	Macrostomum lignano	Platyhelminthes	Eukaryota	Metazoa	Platyhelminthes	NA	Macrostomida	Macrostomidae	Macrostomum	Macrostomum lignano	282301
tr|R7TH98|R7TH98_CAPTE	R7TH98	HC	True	124		NA	1	0	p20[13:136]	147	No	No	Capitella teleta	Annelida	Eukaryota	Metazoa	Annelida	Polychaeta	Capitellida	Capitellidae	Capitella	Capitella teleta	283909
tr|R7TCH8|R7TCH8_CAPTE	R7TCH8	HC	True	137		NA	1	0	p20[78:214]	1196	No	No	Capitella teleta	Annelida	Eukaryota	Metazoa	Annelida	Polychaeta	Capitellida	Capitellidae	Capitella	Capitella teleta	283909
tr|R7TGK9|R7TGK9_CAPTE	R7TGK9	HC	True	126		NA	1	0	p20[8:133]	289	No	No	Capitella teleta	Annelida	Eukaryota	Metazoa	Annelida	Polychaeta	Capitellida	Capitellidae	Capitella	Capitella teleta	283909
tr|B1A4R5|B1A4R5_PENVA	B1A4R5	HC	True	134		NA	1	0	p20[70:203]	316	No	No	Penaeus vannamei	Arthropoda	Eukaryota	Metazoa	Arthropoda	Malacostraca	Decapoda	Penaeidae	Penaeus	Penaeus vannamei	6689
tr|R7TKJ8|R7TKJ8_CAPTE	R7TKJ8	HC	True	129		NA	1	0	p20[43:171]	1109	No	No	Capitella teleta	Annelida	Eukaryota	Metazoa	Annelida	Polychaeta	Capitellida	Capitellidae	Capitella	Capitella teleta	283909
tr|R7TNL1|R7TNL1_CAPTE	R7TNL1	HC	True	121		NA	1	0	p20[9:129]	129	No	No	Capitella teleta	Annelida	Eukaryota	Metazoa	Annelida	Polychaeta	Capitellida	Capitellidae	Capitella	Capitella teleta	283909
tr|R7TLP6|R7TLP6_CAPTE	R7TLP6	HC	True	150		NA	1	0	p20[12:160]	275	No	No	Capitella teleta	Annelida	Eukaryota	Metazoa	Annelida	Polychaeta	Capitellida	Capitellidae	Capitella	Capitella teleta	283909
tr|R7T9Y1|R7T9Y1_CAPTE	R7T9Y1	HC	True	141		NA	1	0	p20[242:381]	483	No	No	Capitella teleta	Annelida	Eukaryota	Metazoa	Annelida	Polychaeta	Capitellida	Capitellidae	Capitella	Capitella teleta	283909
tr|A0A0P4W7R0|A0A0P4W7R0_9EUCA	A0A0P4W7R0	HC	True	138		NA	1	0	p20[97:234]	345	No	No	Scylla olivacea	Arthropoda	Eukaryota	Metazoa	Arthropoda	Malacostraca	Decapoda	Portunidae	Scylla	Scylla olivacea	85551
tr|R7TW55|R7TW55_CAPTE	R7TW55	HC	True	128		NA	1	0	p20[9:136]	136	No	No	Capitella teleta	Annelida	Eukaryota	Metazoa	Annelida	Polychaeta	Capitellida	Capitellidae	Capitella	Capitella teleta	283909
tr|A0A1I8H170|A0A1I8H170_9PLAT	A0A1I8H170	HC	True	146		NA	1	0	p20[464:608]	691	No	No	Macrostomum lignano	Platyhelminthes	Eukaryota	Metazoa	Platyhelminthes	NA	Macrostomida	Macrostomidae	Macrostomum	Macrostomum lignano	282301
tr|R7UQD6|R7UQD6_CAPTE	R7UQD6	HC	True	155		NA	1	0	p20[11:165]	264	No	No	Capitella teleta	Annelida	Eukaryota	Metazoa	Annelida	Polychaeta	Capitellida	Capitellidae	Capitella	Capitella teleta	283909
tr|R7UB90|R7UB90_CAPTE	R7UB90	DC	Pseudo	124		NA	1	0	p20[13:136]	141	No	No	Capitella teleta	Annelida	Eukaryota	Metazoa	Annelida	Polychaeta	Capitellida	Capitellidae	Capitella	Capitella teleta	283909
tr|R7V0D7|R7V0D7_CAPTE	R7V0D7	HC	True	125		NA	1	0	p20[8:132]	141	No	No	Capitella teleta	Annelida	Eukaryota	Metazoa	Annelida	Polychaeta	Capitellida	Capitellidae	Capitella	Capitella teleta	283909
tr|R7TCV6|R7TCV6_CAPTE	R7TCV6	HC	True	134		NA	1	0	p20[177:309]	398	No	No	Capitella teleta	Annelida	Eukaryota	Metazoa	Annelida	Polychaeta	Capitellida	Capitellidae	Capitella	Capitella teleta	283909
tr|A0A1I8IQX3|A0A1I8IQX3_9PLAT	A0A1I8IQX3	HC	True	136		NA	1	0	p20[228:363]	459	No	No	Macrostomum lignano	Platyhelminthes	Eukaryota	Metazoa	Platyhelminthes	NA	Macrostomida	Macrostomidae	Macrostomum	Macrostomum lignano	282301
tr|A0A1I8JJZ0|A0A1I8JJZ0_9PLAT	A0A1I8JJZ0	HC	True	145		NA	1	0	p20[111:255]	299	No	No	Macrostomum lignano	Platyhelminthes	Eukaryota	Metazoa	Platyhelminthes	NA	Macrostomida	Macrostomidae	Macrostomum	Macrostomum lignano	282301
tr|R7UQ09|R7UQ09_CAPTE	R7UQ09	HC	True	178		NA	1	0	p20[179:356]	438	No	No	Capitella teleta	Annelida	Eukaryota	Metazoa	Annelida	Polychaeta	Capitellida	Capitellidae	Capitella	Capitella teleta	283909
tr|R7TVF3|R7TVF3_CAPTE	R7TVF3	HC	True	147		NA	1	0	p20[208:354]	426	No	No	Capitella teleta	Annelida	Eukaryota	Metazoa	Annelida	Polychaeta	Capitellida	Capitellidae	Capitella	Capitella teleta	283909
tr|A0A0P4VT35|A0A0P4VT35_9EUCA	A0A0P4VT35	HC	True	162		NA	1	0	p20[393:554]	781	No	Yes	Scylla olivacea	Arthropoda	Eukaryota	Metazoa	Arthropoda	Malacostraca	Decapoda	Portunidae	Scylla	Scylla olivacea	85551
tr|W5JJK4|W5JJK4_ANODA	W5JJK4	HC	True	110		NA	1	0	p20[293:402]	507	No	No	Anopheles darlingi	Arthropoda	Eukaryota	Metazoa	Arthropoda	Insecta	Diptera	Culicidae	Anopheles	Anopheles darlingi	43151
tr|W5JMV4|W5JMV4_ANODA	W5JMV4	HC	True	145		NA	1	0	p20[143:287]	355	No	No	Anopheles darlingi	Arthropoda	Eukaryota	Metazoa	Arthropoda	Insecta	Diptera	Culicidae	Anopheles	Anopheles darlingi	43151
tr|A0A182YTK9|A0A182YTK9_BIOGL	A0A182YTK9	HC	True	153		NA	1	0	p20[89:239]	433	No	No	Biomphalaria glabrata	Mollusca	Eukaryota	Metazoa	Mollusca	Gastropoda	NA	Planorbidae	Biomphalaria	Biomphalaria glabrata	6526
tr|A0A182YTM9|A0A182YTM9_BIOGL	A0A182YTM9	HC	True	131		NA	1	0	p20[463:593]	596	No	No	Biomphalaria glabrata	Mollusca	Eukaryota	Metazoa	Mollusca	Gastropoda	NA	Planorbidae	Biomphalaria	Biomphalaria glabrata	6526
tr|W7KA48|W7KA48_PLAFO	W7KA48	HC	True	163		NA	1	0	p20[318:476]	613	No	No	Plasmodium falciparum NF54	Apicomplexa	Eukaryota	NA	Apicomplexa	Aconoidasida	Haemosporida	Plasmodiidae	Plasmodium	Plasmodium falciparum	5843
tr|A0A0P5FX42|A0A0P5FX42_9CRUS	A0A0P5FX42	HC	True	136		NA	1	0	p20[359:491]	638	No	No	Daphnia magna	Arthropoda	Eukaryota	Metazoa	Arthropoda	Branchiopoda	Diplostraca	Daphniidae	Daphnia	Daphnia magna	35525
tr|A0A0P5PME5|A0A0P5PME5_9CRUS	A0A0P5PME5	HC	True	120		NA	1	0	p20[390:509]	562	No	No	Daphnia magna	Arthropoda	Eukaryota	Metazoa	Arthropoda	Branchiopoda	Diplostraca	Daphniidae	Daphnia	Daphnia magna	35525
tr|A0A0P5J4H1|A0A0P5J4H1_9CRUS	A0A0P5J4H1	HC	True	136		NA	1	0	p20[359:491]	638	No	No	Daphnia magna	Arthropoda	Eukaryota	Metazoa	Arthropoda	Branchiopoda	Diplostraca	Daphniidae	Daphnia	Daphnia magna	35525
tr|A0A0P5HS29|A0A0P5HS29_9CRUS	A0A0P5HS29	HC	True	136		NA	1	0	p20[360:492]	639	No	No	Daphnia magna	Arthropoda	Eukaryota	Metazoa	Arthropoda	Branchiopoda	Diplostraca	Daphniidae	Daphnia	Daphnia magna	35525
tr|A0A0P5SSF9|A0A0P5SSF9_9CRUS	A0A0P5SSF9	HC	True	145		NA	1	0	p20[371:515]	665	No	No	Daphnia magna	Arthropoda	Eukaryota	Metazoa	Arthropoda	Branchiopoda	Diplostraca	Daphniidae	Daphnia	Daphnia magna	35525
tr|A0A0N8C0J8|A0A0N8C0J8_9CRUS	A0A0N8C0J8	HC	True	169		NA	1	0	p20[380:539]	698	No	No	Daphnia magna	Arthropoda	Eukaryota	Metazoa	Arthropoda	Branchiopoda	Diplostraca	Daphniidae	Daphnia	Daphnia magna	35525
tr|A0A0P6BWB8|A0A0P6BWB8_9CRUS	A0A0P6BWB8	HC	True	124		NA	1	0	p20[255:378]	513	No	No	Daphnia magna	Arthropoda	Eukaryota	Metazoa	Arthropoda	Branchiopoda	Diplostraca	Daphniidae	Daphnia	Daphnia magna	35525
tr|A0A0P5HQ92|A0A0P5HQ92_9CRUS	A0A0P5HQ92	HC	True	149		NA	1	0	p20[368:507]	658	No	No	Daphnia magna	Arthropoda	Eukaryota	Metazoa	Arthropoda	Branchiopoda	Diplostraca	Daphniidae	Daphnia	Daphnia magna	35525
tr|A0A0P5H3A9|A0A0P5H3A9_9CRUS	A0A0P5H3A9	HC	True	145		NA	1	0	p20[363:507]	657	No	No	Daphnia magna	Arthropoda	Eukaryota	Metazoa	Arthropoda	Branchiopoda	Diplostraca	Daphniidae	Daphnia	Daphnia magna	35525
tr|A0A0V1IZU7|A0A0V1IZU7_TRIPS	A0A0V1IZU7	HC	True	134		NA	1	0	p20[314:447]	684	No	No	Trichinella pseudospiralis	Nematoda	Eukaryota	Metazoa	Nematoda	Enoplea	Trichinellida	Trichinellidae	Trichinella	Trichinella pseudospiralis	6337
tr|E5SL06|E5SL06_TRISP	E5SL06	HC	True	137		NA	1	0	p20[313:449]	694	No	Yes	Trichinella spiralis	Nematoda	Eukaryota	Metazoa	Nematoda	Enoplea	Trichinellida	Trichinellidae	Trichinella	Trichinella spiralis	6334
tr|A0A0V1JSG7|A0A0V1JSG7_TRIPS	A0A0V1JSG7	HC	True	134		NA	1	0	p20[291:424]	661	No	No	Trichinella pseudospiralis	Nematoda	Eukaryota	Metazoa	Nematoda	Enoplea	Trichinellida	Trichinellidae	Trichinella	Trichinella pseudospiralis	6337
tr|I1VAW6|I1VAW6_9CRUS	I1VAW6	HC	True	122		NA	1	0	p20[4:125]	182	No	No	Daphnia parvula	Arthropoda	Eukaryota	Metazoa	Arthropoda	Branchiopoda	Diplostraca	Daphniidae	Daphnia	Daphnia parvula	132684
tr|T1G6K9|T1G6K9_HELRO	T1G6K9	HC	True	140		NA	1	0	p20[4:143]	209	No	No	Helobdella robusta	Annelida	Eukaryota	Metazoa	Annelida	Clitellata	Hirudinida	Glossiphoniidae	Helobdella	Helobdella robusta	6412
tr|T1FFC9|T1FFC9_HELRO	T1FFC9	HA	Pseudo	124		NA	1	0	p20[49:172]	406	No	No	Helobdella robusta	Annelida	Eukaryota	Metazoa	Annelida	Clitellata	Hirudinida	Glossiphoniidae	Helobdella	Helobdella robusta	6412
tr|T1FBB9|T1FBB9_HELRO	T1FBB9	HC	True	124		NA	1	0	p20[112:235]	330	No	No	Helobdella robusta	Annelida	Eukaryota	Metazoa	Annelida	Clitellata	Hirudinida	Glossiphoniidae	Helobdella	Helobdella robusta	6412
tr|T1EFE9|T1EFE9_HELRO	T1EFE9	HS	Pseudo	135		NA	1	0	p20[19:153]	253	No	No	Helobdella robusta	Annelida	Eukaryota	Metazoa	Annelida	Clitellata	Hirudinida	Glossiphoniidae	Helobdella	Helobdella robusta	6412
tr|A0A1B6LV50|A0A1B6LV50_9HEMI	A0A1B6LV50	HC	True	127		NA	1	0	p20[316:442]	672	No	Yes	Graphocephala atropunctata	Arthropoda	Eukaryota	Metazoa	Arthropoda	Insecta	Hemiptera	Cicadellidae	Graphocephala	Graphocephala atropunctata	36148
tr|N6T370|N6T370_DENPD	N6T370	HC	True	141		NA	1	0	p20[165:305]	425	No	No	Dendroctonus ponderosae	Arthropoda	Eukaryota	Metazoa	Arthropoda	Insecta	Coleoptera	Curculionidae	Dendroctonus	Dendroctonus ponderosae	77166
tr|N6TGN6|N6TGN6_DENPD	N6TGN6	HC	True	150		NA	1	0	p20[354:503]	600	No	No	Dendroctonus ponderosae	Arthropoda	Eukaryota	Metazoa	Arthropoda	Insecta	Coleoptera	Curculionidae	Dendroctonus	Dendroctonus ponderosae	77166
tr|F5A8D9|F5A8D9_CRAGI	F5A8D9	HC	True	167		NA	1	0	p20[151:317]	428	No	No	Crassostrea gigas	Mollusca	Eukaryota	Metazoa	Mollusca	Bivalvia	Ostreoida	Ostreidae	Crassostrea	Crassostrea gigas	29159
tr|A0A0K8UJ41|A0A0K8UJ41_BACLA	A0A0K8UJ41	HC	True	136		NA	1	0	p20[367:502]	562	No	No	Bactrocera latifrons	Arthropoda	Eukaryota	Metazoa	Arthropoda	Insecta	Diptera	Tephritidae	Bactrocera	Bactrocera latifrons	174628
tr|E3LQQ4|E3LQQ4_CAERE	E3LQQ4	HC	True	124		NA	1	0	p20[251:374]	638	No	Yes	Caenorhabditis remanei	Nematoda	Eukaryota	Metazoa	Nematoda	Chromadorea	Rhabditida	Rhabditidae	Caenorhabditis	Caenorhabditis remanei	31234
tr|G0ZIA6|G0ZIA6_PLAVI	G0ZIA6	HC	True	154		NA	1	0	p20[286:439]	593	No	No	Plasmodium vivax	Apicomplexa	Eukaryota	NA	Apicomplexa	Aconoidasida	Haemosporida	Plasmodiidae	Plasmodium	Plasmodium vivax	5855
tr|Q6V6R8|Q6V6R8_DROSI	Q6V6R8	HC	True	132		NA	1	0	p20[172:303]	357	No	No	Drosophila simulans	Arthropoda	Eukaryota	Metazoa	Arthropoda	Insecta	Diptera	Drosophilidae	Drosophila	Drosophila simulans	7240
tr|E9JEH0|E9JEH0_BOMMO	E9JEH0	HC	True	134		NA	1	0	p20[141:274]	356	No	No	Bombyx mori	Arthropoda	Eukaryota	Metazoa	Arthropoda	Insecta	Lepidoptera	Bombycidae	Bombyx	Bombyx mori	7091
tr|A0A384L055|A0A384L055_PLAKH	A0A384L055	HC	True	154		NA	1	0	p20[345:497]	642	No	No	Plasmodium knowlesi strain H	Apicomplexa	Eukaryota	NA	Apicomplexa	Aconoidasida	Haemosporida	Plasmodiidae	Plasmodium	Plasmodium knowlesi	5851
tr|A0A1Y1LIF0|A0A1Y1LIF0_PHOPY	A0A1Y1LIF0	HC	True	138		NA	1	0	p20[173:310]	320	No	No	Photinus pyralis	Arthropoda	Eukaryota	Metazoa	Arthropoda	Insecta	Coleoptera	Lampyridae	Photinus	Photinus pyralis	7054
tr|A0A193R8P2|A0A193R8P2_PLAKH	A0A193R8P2	YT	Pseudo	138		NA	1	0	p20[1385:1521]	1861	No	No	Plasmodium knowlesi strain H	Apicomplexa	Eukaryota	NA	Apicomplexa	Aconoidasida	Haemosporida	Plasmodiidae	Plasmodium	Plasmodium knowlesi	5851
tr|A0A151X481|A0A151X481_9HYME	A0A151X481	HC	True	122		NA	1	0	p20[294:415]	649	No	Yes	Trachymyrmex zeteki	Arthropoda	Eukaryota	Metazoa	Arthropoda	Insecta	Hymenoptera	Formicidae	Trachymyrmex	Trachymyrmex zeteki	64791
tr|A0A1A9W3E3|A0A1A9W3E3_9MUSC	A0A1A9W3E3	HC	True	138		NA	1	0	p20[215:351]	451	No	No	Glossina brevipalpis	Arthropoda	Eukaryota	Metazoa	Arthropoda	Insecta	Diptera	Glossinidae	Glossina	Glossina brevipalpis	37001
tr|V3ZNX3|V3ZNX3_LOTGI	V3ZNX3	HC	True	125		NA	1	0	p20[9:132]	203	No	No	Lottia gigantea	Mollusca	Eukaryota	Metazoa	Mollusca	Gastropoda	NA	Lottiidae	Lottia	Lottia gigantea	225164
tr|V3YWV8|V3YWV8_LOTGI	V3YWV8	HC	True	122		NA	1	0	p20[16:137]	218	No	No	Lottia gigantea	Mollusca	Eukaryota	Metazoa	Mollusca	Gastropoda	NA	Lottiidae	Lottia	Lottia gigantea	225164
tr|V4A6Z8|V4A6Z8_LOTGI	V4A6Z8	HC	True	149		NA	1	0	p20[50:198]	222	No	No	Lottia gigantea	Mollusca	Eukaryota	Metazoa	Mollusca	Gastropoda	NA	Lottiidae	Lottia	Lottia gigantea	225164
tr|V4A701|V4A701_LOTGI	V4A701	HC	True	147		NA	1	0	p20[11:157]	252	No	No	Lottia gigantea	Mollusca	Eukaryota	Metazoa	Mollusca	Gastropoda	NA	Lottiidae	Lottia	Lottia gigantea	225164
tr|V4B2H0|V4B2H0_LOTGI	V4B2H0	YV	Pseudo	121		NA	1	0	p20[241:361]	494	No	No	Lottia gigantea	Mollusca	Eukaryota	Metazoa	Mollusca	Gastropoda	NA	Lottiidae	Lottia	Lottia gigantea	225164
tr|V3ZXE5|V3ZXE5_LOTGI	V3ZXE5	HC	True	143		NA	1	0	p20[72:214]	342	No	No	Lottia gigantea	Mollusca	Eukaryota	Metazoa	Mollusca	Gastropoda	NA	Lottiidae	Lottia	Lottia gigantea	225164
tr|V4CQ43|V4CQ43_LOTGI	V4CQ43	HC	True	121		NA	1	0	p20[10:130]	130	No	No	Lottia gigantea	Mollusca	Eukaryota	Metazoa	Mollusca	Gastropoda	NA	Lottiidae	Lottia	Lottia gigantea	225164
tr|A0A183IYM2|A0A183IYM2_9BILA	A0A183IYM2	HC	True	124		NA	1	0	p20[150:273]	274	No	No	Soboliphyme baturini	Nematoda	Eukaryota	Metazoa	Nematoda	Enoplea	Dioctophymatida	Soboliphymatidae	Soboliphyme	Soboliphyme baturini	241478
tr|V4A4Z9|V4A4Z9_LOTGI	V4A4Z9	HC	True	123		NA	1	0	p20[107:229]	231	No	Yes	Lottia gigantea	Mollusca	Eukaryota	Metazoa	Mollusca	Gastropoda	NA	Lottiidae	Lottia	Lottia gigantea	225164
tr|K1PUG0|K1PUG0_CRAGI	K1PUG0	HC	True	146		NA	1	0	p20[115:260]	732	No	No	Crassostrea gigas	Mollusca	Eukaryota	Metazoa	Mollusca	Bivalvia	Ostreoida	Ostreidae	Crassostrea	Crassostrea gigas	29159
tr|K1RF68|K1RF68_CRAGI	K1RF68	HC	True	150		NA	1	0	p20[7:156]	776	No	No	Crassostrea gigas	Mollusca	Eukaryota	Metazoa	Mollusca	Bivalvia	Ostreoida	Ostreidae	Crassostrea	Crassostrea gigas	29159
tr|K1Q1V8|K1Q1V8_CRAGI	K1Q1V8	QC	Pseudo	146		NA	1	0	p20[749:893]	1004	No	No	Crassostrea gigas	Mollusca	Eukaryota	Metazoa	Mollusca	Bivalvia	Ostreoida	Ostreidae	Crassostrea	Crassostrea gigas	29159
tr|K1QHS5|K1QHS5_CRAGI	K1QHS5	YE	Pseudo	143		NA	1	0	p20[14:156]	395	No	No	Crassostrea gigas	Mollusca	Eukaryota	Metazoa	Mollusca	Bivalvia	Ostreoida	Ostreidae	Crassostrea	Crassostrea gigas	29159
tr|K1QS68|K1QS68_CRAGI	K1QS68	HC	True	119		NA	1	0	p20[14:132]	361	No	No	Crassostrea gigas	Mollusca	Eukaryota	Metazoa	Mollusca	Bivalvia	Ostreoida	Ostreidae	Crassostrea	Crassostrea gigas	29159
tr|K1QLR9|K1QLR9_CRAGI	K1QLR9	HC	True	140		NA	1	0	p20[408:546]	794	No	Yes	Crassostrea gigas	Mollusca	Eukaryota	Metazoa	Mollusca	Bivalvia	Ostreoida	Ostreidae	Crassostrea	Crassostrea gigas	29159
tr|K1QKY4|K1QKY4_CRAGI	K1QKY4	HC	True	173		NA	1	0	p20[110:282]	549	No	No	Crassostrea gigas	Mollusca	Eukaryota	Metazoa	Mollusca	Bivalvia	Ostreoida	Ostreidae	Crassostrea	Crassostrea gigas	29159
tr|A0A1B0VRS2|A0A1B0VRS2_CRAGI	A0A1B0VRS2	HC	True	166		NA	1	0	p20[140:305]	541	No	No	Crassostrea gigas	Mollusca	Eukaryota	Metazoa	Mollusca	Bivalvia	Ostreoida	Ostreidae	Crassostrea	Crassostrea gigas	29159
tr|K1QZ69|K1QZ69_CRAGI	K1QZ69	YC	Pseudo	137		NA	1	0	p20[170:306]	435	No	No	Crassostrea gigas	Mollusca	Eukaryota	Metazoa	Mollusca	Bivalvia	Ostreoida	Ostreidae	Crassostrea	Crassostrea gigas	29159
tr|K1PJM8|K1PJM8_CRAGI	K1PJM8	HC	True	158		NA	1	0	p20[229:386]	441	No	No	Crassostrea gigas	Mollusca	Eukaryota	Metazoa	Mollusca	Bivalvia	Ostreoida	Ostreidae	Crassostrea	Crassostrea gigas	29159
tr|K1PVQ1|K1PVQ1_CRAGI	K1PVQ1	HC	True	148		NA	1	0	p20[19:166]	201	No	No	Crassostrea gigas	Mollusca	Eukaryota	Metazoa	Mollusca	Bivalvia	Ostreoida	Ostreidae	Crassostrea	Crassostrea gigas	29159
tr|A0A0V0S2A6|A0A0V0S2A6_9BILA	A0A0V0S2A6	HC	True	134		NA	1	0	p20[299:432]	670	No	Yes	Trichinella nelsoni	Nematoda	Eukaryota	Metazoa	Nematoda	Enoplea	Trichinellida	Trichinellidae	Trichinella	Trichinella nelsoni	6336
tr|W4IBE8|W4IBE8_PLAFA	W4IBE8	HC	True	163		NA	1	0	p20[318:476]	613	No	No	Plasmodium falciparum NF135/5.C10	Apicomplexa	Eukaryota	NA	Apicomplexa	Aconoidasida	Haemosporida	Plasmodiidae	Plasmodium	Plasmodium falciparum	1036726
tr|A0A069DW63|A0A069DW63_9HEMI	A0A069DW63	HC	True	125		NA	1	0	p20[292:416]	632	No	Yes	Panstrongylus megistus	Arthropoda	Eukaryota	Metazoa	Arthropoda	Insecta	Hemiptera	Reduviidae	Panstrongylus	Panstrongylus megistus	65343
tr|K1QH43|K1QH43_CRAGI	K1QH43	HC	True	123		NA	1	0	p20[664:784]	898	No	No	Crassostrea gigas	Mollusca	Eukaryota	Metazoa	Mollusca	Bivalvia	Ostreoida	Ostreidae	Crassostrea	Crassostrea gigas	29159
tr|A0A1I7SVU6|A0A1I7SVU6_BURXY	A0A1I7SVU6	HC	True	125		NA	1	0	p20[262:386]	643	No	No	Bursaphelenchus xylophilus	Nematoda	Eukaryota	Metazoa	Nematoda	Chromadorea	Rhabditida	Aphelenchoididae	Bursaphelenchus	Bursaphelenchus xylophilus	6326
tr|A0A182TC45|A0A182TC45_9DIPT	A0A182TC45	HC	True	133		NA	1	0	p20[19:149]	233	No	No	Anopheles maculatus	Arthropoda	Eukaryota	Metazoa	Arthropoda	Insecta	Diptera	Culicidae	Anopheles	Anopheles maculatus	74869
tr|A0A212EV13|A0A212EV13_DANPL	A0A212EV13	HC	True	134		NA	1	0	p20[82:215]	357	No	No	Danaus plexippus plexippus	Arthropoda	Eukaryota	Metazoa	Arthropoda	Insecta	Lepidoptera	Nymphalidae	Danaus	Danaus plexippus	278856
tr|A0A1B0C8E6|A0A1B0C8E6_LUTLO	A0A1B0C8E6	HC	True	118		NA	1	0	p20[176:293]	293	No	No	Lutzomyia longipalpis	Arthropoda	Eukaryota	Metazoa	Arthropoda	Insecta	Diptera	Psychodidae	Lutzomyia	Lutzomyia longipalpis	7200
tr|A0A1X9PWQ7|A0A1X9PWQ7_PORTR	A0A1X9PWQ7	HC	True	124		NA	1	0	p20[205:328]	460	No	No	Portunus trituberculatus	Arthropoda	Eukaryota	Metazoa	Arthropoda	Malacostraca	Decapoda	Portunidae	Portunus	Portunus trituberculatus	210409
tr|A0A024WHM8|A0A024WHM8_PLAFA	A0A024WHM8	YT	Pseudo	138		NA	1	0	p20[240:376]	746	No	No	Plasmodium falciparum MaliPS096_E11	Apicomplexa	Eukaryota	NA	Apicomplexa	Aconoidasida	Haemosporida	Plasmodiidae	Plasmodium	Plasmodium falciparum	1036727
tr|A0A0D2X4X5|A0A0D2X4X5_CAPO3	A0A0D2X4X5	HC	True	138		NA	1	0	p20[994:1130]	1392	No	No	Capsaspora owczarzaki ATCC 30864	NA	Eukaryota	NA	NA	Ichthyosporea	NA	NA	Capsaspora	Capsaspora owczarzaki	595528
tr|A0A024WLB9|A0A024WLB9_PLAFA	A0A024WLB9	HC	True	163		NA	1	0	p20[318:476]	613	No	No	Plasmodium falciparum MaliPS096_E11	Apicomplexa	Eukaryota	NA	Apicomplexa	Aconoidasida	Haemosporida	Plasmodiidae	Plasmodium	Plasmodium falciparum	1036727
tr|A0A024WI44|A0A024WI44_PLAFA	A0A024WI44	YT	Pseudo	138		NA	1	0	p20[240:376]	714	No	No	Plasmodium falciparum MaliPS096_E11	Apicomplexa	Eukaryota	NA	Apicomplexa	Aconoidasida	Haemosporida	Plasmodiidae	Plasmodium	Plasmodium falciparum	1036727
tr|I1VAW8|I1VAW8_DAPPU	I1VAW8	HC	True	121		NA	1	0	p20[6:125]	182	No	No	Daphnia pulex	Arthropoda	Eukaryota	Metazoa	Arthropoda	Branchiopoda	Diplostraca	Daphniidae	Daphnia	Daphnia pulex	6669
tr|E9HAH6|E9HAH6_DAPPU	E9HAH6	HC	True	136		NA	1	0	p20[11:146]	247	No	No	Daphnia pulex	Arthropoda	Eukaryota	Metazoa	Arthropoda	Branchiopoda	Diplostraca	Daphniidae	Daphnia	Daphnia pulex	6669
tr|E9HAH1|E9HAH1_DAPPU	E9HAH1	HC	True	121		NA	1	0	p20[10:130]	245	No	No	Daphnia pulex	Arthropoda	Eukaryota	Metazoa	Arthropoda	Branchiopoda	Diplostraca	Daphniidae	Daphnia	Daphnia pulex	6669
tr|I1VAZ8|I1VAZ8_DAPPU	I1VAZ8	HC	True	128		NA	1	0	p20[39:166]	170	No	No	Daphnia pulex	Arthropoda	Eukaryota	Metazoa	Arthropoda	Branchiopoda	Diplostraca	Daphniidae	Daphnia	Daphnia pulex	6669
tr|I1VAZ5|I1VAZ5_DAPPU	I1VAZ5	HC	True	128		NA	1	0	p20[39:166]	170	No	No	Daphnia pulex	Arthropoda	Eukaryota	Metazoa	Arthropoda	Branchiopoda	Diplostraca	Daphniidae	Daphnia	Daphnia pulex	6669
tr|I1VAX6|I1VAX6_DAPPU	I1VAX6	HC	True	122		NA	1	0	p20[4:125]	182	No	No	Daphnia pulex	Arthropoda	Eukaryota	Metazoa	Arthropoda	Branchiopoda	Diplostraca	Daphniidae	Daphnia	Daphnia pulex	6669
tr|E9GH86|E9GH86_DAPPU	E9GH86	HC	True	115		NA	1	0	p20[3:115]	273	No	No	Daphnia pulex	Arthropoda	Eukaryota	Metazoa	Arthropoda	Branchiopoda	Diplostraca	Daphniidae	Daphnia	Daphnia pulex	6669
tr|I1VB12|I1VB12_DAPPU	I1VB12	HC	True	133		NA	1	0	p20[12:144]	190	No	No	Daphnia pulex	Arthropoda	Eukaryota	Metazoa	Arthropoda	Branchiopoda	Diplostraca	Daphniidae	Daphnia	Daphnia pulex	6669
tr|I1VB04|I1VB04_DAPPU	I1VB04	HC	True	128		NA	1	0	p20[39:166]	170	No	No	Daphnia pulex	Arthropoda	Eukaryota	Metazoa	Arthropoda	Branchiopoda	Diplostraca	Daphniidae	Daphnia	Daphnia pulex	6669
tr|I1VAX0|I1VAX0_DAPPU	I1VAX0	HC	True	122		NA	1	0	p20[4:125]	182	No	No	Daphnia pulex	Arthropoda	Eukaryota	Metazoa	Arthropoda	Branchiopoda	Diplostraca	Daphniidae	Daphnia	Daphnia pulex	6669
tr|I1VAX8|I1VAX8_DAPPU	I1VAX8	HC	True	122		NA	1	0	p20[4:125]	182	No	No	Daphnia pulex	Arthropoda	Eukaryota	Metazoa	Arthropoda	Branchiopoda	Diplostraca	Daphniidae	Daphnia	Daphnia pulex	6669
tr|E9G4M1|E9G4M1_DAPPU	E9G4M1	HC	True	149		NA	1	0	p20[46:193]	296	No	No	Daphnia pulex	Arthropoda	Eukaryota	Metazoa	Arthropoda	Branchiopoda	Diplostraca	Daphniidae	Daphnia	Daphnia pulex	6669
tr|I1VB35|I1VB35_DAPPU	I1VB35	HC	True	130		NA	1	0	p20[7:136]	195	No	No	Daphnia pulex	Arthropoda	Eukaryota	Metazoa	Arthropoda	Branchiopoda	Diplostraca	Daphniidae	Daphnia	Daphnia pulex	6669
tr|E9HEP5|E9HEP5_DAPPU	E9HEP5	HC	True	102		NA	1	0	p20[1:102]	263	No	No	Daphnia pulex	Arthropoda	Eukaryota	Metazoa	Arthropoda	Branchiopoda	Diplostraca	Daphniidae	Daphnia	Daphnia pulex	6669
tr|I1VB06|I1VB06_DAPPU	I1VB06	HC	True	128		NA	1	0	p20[39:166]	170	No	No	Daphnia pulex	Arthropoda	Eukaryota	Metazoa	Arthropoda	Branchiopoda	Diplostraca	Daphniidae	Daphnia	Daphnia pulex	6669
tr|T1JVJ5|T1JVJ5_TETUR	T1JVJ5	HC	True	147		NA	1	0	p20[238:384]	482	No	No	Tetranychus urticae	Arthropoda	Eukaryota	Metazoa	Arthropoda	Arachnida	Trombidiformes	Tetranychidae	Tetranychus	Tetranychus urticae	32264
tr|I1VAZ4|I1VAZ4_DAPPU	I1VAZ4	HC	True	128		NA	1	0	p20[39:166]	170	No	No	Daphnia pulex	Arthropoda	Eukaryota	Metazoa	Arthropoda	Branchiopoda	Diplostraca	Daphniidae	Daphnia	Daphnia pulex	6669
tr|I1VB07|I1VB07_DAPPU	I1VB07	HC	True	112		NA	1	0	p20[55:166]	170	No	No	Daphnia pulex	Arthropoda	Eukaryota	Metazoa	Arthropoda	Branchiopoda	Diplostraca	Daphniidae	Daphnia	Daphnia pulex	6669
tr|I1VB36|I1VB36_DAPPU	I1VB36	HC	True	123		NA	1	0	p20[7:129]	195	No	No	Daphnia pulex	Arthropoda	Eukaryota	Metazoa	Arthropoda	Branchiopoda	Diplostraca	Daphniidae	Daphnia	Daphnia pulex	6669
tr|I1VAW5|I1VAW5_DAPPU	I1VAW5	HC	True	122		NA	1	0	p20[4:125]	182	No	No	Daphnia pulex	Arthropoda	Eukaryota	Metazoa	Arthropoda	Branchiopoda	Diplostraca	Daphniidae	Daphnia	Daphnia pulex	6669
tr|T1K3H1|T1K3H1_TETUR	T1K3H1	HC	True	136		NA	1	0	p20[197:332]	440	No	No	Tetranychus urticae	Arthropoda	Eukaryota	Metazoa	Arthropoda	Arachnida	Trombidiformes	Tetranychidae	Tetranychus	Tetranychus urticae	32264
tr|I1VAX2|I1VAX2_DAPPU	I1VAX2	HC	True	122		NA	1	0	p20[4:125]	182	No	No	Daphnia pulex	Arthropoda	Eukaryota	Metazoa	Arthropoda	Branchiopoda	Diplostraca	Daphniidae	Daphnia	Daphnia pulex	6669
tr|I1VB34|I1VB34_DAPPU	I1VB34	HC	True	123		NA	1	0	p20[7:129]	195	No	No	Daphnia pulex	Arthropoda	Eukaryota	Metazoa	Arthropoda	Branchiopoda	Diplostraca	Daphniidae	Daphnia	Daphnia pulex	6669
tr|I1VB09|I1VB09_DAPPU	I1VB09	HC	True	133		NA	1	0	p20[12:144]	224	No	No	Daphnia pulex	Arthropoda	Eukaryota	Metazoa	Arthropoda	Branchiopoda	Diplostraca	Daphniidae	Daphnia	Daphnia pulex	6669
tr|I1VAW7|I1VAW7_DAPPU	I1VAW7	HC	True	122		NA	1	0	p20[4:125]	182	No	No	Daphnia pulex	Arthropoda	Eukaryota	Metazoa	Arthropoda	Branchiopoda	Diplostraca	Daphniidae	Daphnia	Daphnia pulex	6669
tr|E9H0N0|E9H0N0_DAPPU	E9H0N0	HC	True	108		NA	1	0	p20[3:109]	126	No	No	Daphnia pulex	Arthropoda	Eukaryota	Metazoa	Arthropoda	Branchiopoda	Diplostraca	Daphniidae	Daphnia	Daphnia pulex	6669
tr|E9GTR4|E9GTR4_DAPPU	E9GTR4	HC	True	120		NA	1	0	p20[2:121]	146	No	No	Daphnia pulex	Arthropoda	Eukaryota	Metazoa	Arthropoda	Branchiopoda	Diplostraca	Daphniidae	Daphnia	Daphnia pulex	6669
tr|I1VB33|I1VB33_DAPPU	I1VB33	HC	True	123		NA	1	0	p20[7:129]	195	No	No	Daphnia pulex	Arthropoda	Eukaryota	Metazoa	Arthropoda	Branchiopoda	Diplostraca	Daphniidae	Daphnia	Daphnia pulex	6669
tr|A0A286NH17|A0A286NH17_DAPPU	A0A286NH17	HC	True	133		NA	1	0	p20[44:176]	263	No	No	Daphnia pulex	Arthropoda	Eukaryota	Metazoa	Arthropoda	Branchiopoda	Diplostraca	Daphniidae	Daphnia	Daphnia pulex	6669
tr|I1VAZ7|I1VAZ7_DAPPU	I1VAZ7	HC	True	128		NA	1	0	p20[39:166]	170	No	No	Daphnia pulex	Arthropoda	Eukaryota	Metazoa	Arthropoda	Branchiopoda	Diplostraca	Daphniidae	Daphnia	Daphnia pulex	6669
tr|I1VB32|I1VB32_DAPPU	I1VB32	HC	True	123		NA	1	0	p20[7:129]	195	No	No	Daphnia pulex	Arthropoda	Eukaryota	Metazoa	Arthropoda	Branchiopoda	Diplostraca	Daphniidae	Daphnia	Daphnia pulex	6669
tr|A0A023I0X8|A0A023I0X8_TIGJA	A0A023I0X8	HC	True	127		NA	1	0	p20[21:147]	149	No	No	Tigriopus japonicus	Arthropoda	Eukaryota	Metazoa	Arthropoda	Hexanauplia	Harpacticoida	Harpacticidae	Tigriopus	Tigriopus japonicus	158387
tr|I1VB05|I1VB05_DAPPU	I1VB05	HC	True	128		NA	1	0	p20[39:166]	170	No	No	Daphnia pulex	Arthropoda	Eukaryota	Metazoa	Arthropoda	Branchiopoda	Diplostraca	Daphniidae	Daphnia	Daphnia pulex	6669
tr|E9G5I2|E9G5I2_DAPPU	E9G5I2	HC	True	120		NA	1	0	p20[13:132]	218	No	No	Daphnia pulex	Arthropoda	Eukaryota	Metazoa	Arthropoda	Branchiopoda	Diplostraca	Daphniidae	Daphnia	Daphnia pulex	6669
tr|I1VB29|I1VB29_DAPPU	I1VB29	HC	True	130		NA	1	0	p20[7:136]	195	No	No	Daphnia pulex	Arthropoda	Eukaryota	Metazoa	Arthropoda	Branchiopoda	Diplostraca	Daphniidae	Daphnia	Daphnia pulex	6669
tr|E9G4M2|E9G4M2_DAPPU	E9G4M2	HC	True	129		NA	1	0	p20[8:136]	232	No	No	Daphnia pulex	Arthropoda	Eukaryota	Metazoa	Arthropoda	Branchiopoda	Diplostraca	Daphniidae	Daphnia	Daphnia pulex	6669
tr|I1VAW9|I1VAW9_DAPPU	I1VAW9	HC	True	121		NA	1	0	p20[5:125]	182	No	No	Daphnia pulex	Arthropoda	Eukaryota	Metazoa	Arthropoda	Branchiopoda	Diplostraca	Daphniidae	Daphnia	Daphnia pulex	6669
tr|I1VB01|I1VB01_DAPPU	I1VB01	HC	True	128		NA	1	0	p20[39:166]	170	No	No	Daphnia pulex	Arthropoda	Eukaryota	Metazoa	Arthropoda	Branchiopoda	Diplostraca	Daphniidae	Daphnia	Daphnia pulex	6669
tr|I1VB28|I1VB28_DAPPU	I1VB28	HC	True	123		NA	1	0	p20[7:129]	195	No	No	Daphnia pulex	Arthropoda	Eukaryota	Metazoa	Arthropoda	Branchiopoda	Diplostraca	Daphniidae	Daphnia	Daphnia pulex	6669
tr|A0A1B1E339|A0A1B1E339_9APIC	A0A1B1E339	HC	True	154		NA	1	0	p20[345:497]	635	No	No	Plasmodium coatneyi	Apicomplexa	Eukaryota	NA	Apicomplexa	Aconoidasida	Haemosporida	Plasmodiidae	Plasmodium	Plasmodium coatneyi	208452
tr|A0A2P9BKT4|A0A2P9BKT4_9APIC	A0A2P9BKT4	HC	True	163		NA	1	0	p20[318:476]	613	No	No	Plasmodium sp. gorilla clade G1	Apicomplexa	Eukaryota	NA	Apicomplexa	Aconoidasida	Haemosporida	Plasmodiidae	Plasmodium	Plasmodium sp. gorilla clade G1	880534
tr|A0A1B1E5H3|A0A1B1E5H3_9APIC	A0A1B1E5H3	YT	Pseudo	138		NA	1	0	p20[1357:1494]	1833	No	No	Plasmodium coatneyi	Apicomplexa	Eukaryota	NA	Apicomplexa	Aconoidasida	Haemosporida	Plasmodiidae	Plasmodium	Plasmodium coatneyi	208452
tr|W7JS76|W7JS76_PLAFA	W7JS76	HC	True	163		NA	1	0	p20[318:476]	613	No	No	Plasmodium falciparum UGT5.1	Apicomplexa	Eukaryota	NA	Apicomplexa	Aconoidasida	Haemosporida	Plasmodiidae	Plasmodium	Plasmodium falciparum	1237627
tr|E9G767|E9G767_DAPPU	E9G767	HC	True	135		NA	1	0	p20[189:322]	556	No	Yes	Daphnia pulex	Arthropoda	Eukaryota	Metazoa	Arthropoda	Branchiopoda	Diplostraca	Daphniidae	Daphnia	Daphnia pulex	6669
tr|A0A026VZ52|A0A026VZ52_OOCBI	A0A026VZ52	HC	True	123		NA	1	0	p20[291:412]	646	No	Yes	Ooceraea biroi	Arthropoda	Eukaryota	Metazoa	Arthropoda	Insecta	Hymenoptera	Formicidae	Ooceraea	Ooceraea biroi	2015173
tr|A0A1B6JA75|A0A1B6JA75_9HEMI	A0A1B6JA75	HC	True	127		NA	1	0	p20[390:516]	638	No	No	Homalodisca liturata	Arthropoda	Eukaryota	Metazoa	Arthropoda	Insecta	Hemiptera	Cicadellidae	Homalodisca	Homalodisca liturata	320908
tr|A0A026W878|A0A026W878_OOCBI	A0A026W878	HC	True	158		NA	1	0	p20[41:198]	300	No	No	Ooceraea biroi	Arthropoda	Eukaryota	Metazoa	Arthropoda	Insecta	Hymenoptera	Formicidae	Ooceraea	Ooceraea biroi	2015173
tr|A0A026W1V2|A0A026W1V2_OOCBI	A0A026W1V2	HC	True	149		NA	1	0	p20[157:305]	412	No	No	Ooceraea biroi	Arthropoda	Eukaryota	Metazoa	Arthropoda	Insecta	Hymenoptera	Formicidae	Ooceraea	Ooceraea biroi	2015173
tr|A0A1B6HII0|A0A1B6HII0_9HEMI	A0A1B6HII0	HC	True	127		NA	1	0	p20[302:428]	657	No	Yes	Homalodisca liturata	Arthropoda	Eukaryota	Metazoa	Arthropoda	Insecta	Hemiptera	Cicadellidae	Homalodisca	Homalodisca liturata	320908
tr|A0A182FTB8|A0A182FTB8_ANOAL	A0A182FTB8	HC	True	109		NA	1	0	p20[288:396]	873	No	No	Anopheles albimanus	Arthropoda	Eukaryota	Metazoa	Arthropoda	Insecta	Diptera	Culicidae	Anopheles	Anopheles albimanus	7167
tr|A0A182FWB6|A0A182FWB6_ANOAL	A0A182FWB6	HC	True	135		NA	1	0	p20[52:185]	243	No	No	Anopheles albimanus	Arthropoda	Eukaryota	Metazoa	Arthropoda	Insecta	Diptera	Culicidae	Anopheles	Anopheles albimanus	7167
tr|A0A182FWB5|A0A182FWB5_ANOAL	A0A182FWB5	HC	True	148		NA	1	0	p20[145:291]	380	No	No	Anopheles albimanus	Arthropoda	Eukaryota	Metazoa	Arthropoda	Insecta	Diptera	Culicidae	Anopheles	Anopheles albimanus	7167
tr|A0A182FJA8|A0A182FJA8_ANOAL	A0A182FJA8	HC	True	150		NA	1	0	p20[193:342]	452	No	No	Anopheles albimanus	Arthropoda	Eukaryota	Metazoa	Arthropoda	Insecta	Diptera	Culicidae	Anopheles	Anopheles albimanus	7167
tr|A0A0L7KH01|A0A0L7KH01_PLAFX	A0A0L7KH01	HC	True	156		NA	1	0	p20[318:473]	589	No	No	Plasmodium falciparum HB3	Apicomplexa	Eukaryota	NA	Apicomplexa	Aconoidasida	Haemosporida	Plasmodiidae	Plasmodium	Plasmodium falciparum	137071
tr|A0A0L7K640|A0A0L7K640_PLAFX	A0A0L7K640	YT	Pseudo	138		NA	1	0	p20[175:311]	576	No	No	Plasmodium falciparum HB3	Apicomplexa	Eukaryota	NA	Apicomplexa	Aconoidasida	Haemosporida	Plasmodiidae	Plasmodium	Plasmodium falciparum	137071
tr|A0A016WNI0|A0A016WNI0_9BILA	A0A016WNI0	HC	True	124		NA	1	0	p20[287:410]	669	No	No	Ancylostoma ceylanicum	Nematoda	Eukaryota	Metazoa	Nematoda	Chromadorea	Rhabditida	Ancylostomatidae	Ancylostoma	Ancylostoma ceylanicum	53326
tr|A0A2P8XS98|A0A2P8XS98_BLAGE	A0A2P8XS98	HC	True	142		NA	1	0	p20[219:360]	459	No	No	Blattella germanica	Arthropoda	Eukaryota	Metazoa	Arthropoda	Insecta	Blattodea	Ectobiidae	Blattella	Blattella germanica	6973
tr|A0A2P8XZ84|A0A2P8XZ84_BLAGE	A0A2P8XZ84	HC	True	136		NA	1	0	p20[44:179]	222	No	No	Blattella germanica	Arthropoda	Eukaryota	Metazoa	Arthropoda	Insecta	Blattodea	Ectobiidae	Blattella	Blattella germanica	6973
tr|A0A2P8ZK23|A0A2P8ZK23_BLAGE	A0A2P8ZK23	HC	True	136		NA	1	0	p20[49:184]	302	No	No	Blattella germanica	Arthropoda	Eukaryota	Metazoa	Arthropoda	Insecta	Blattodea	Ectobiidae	Blattella	Blattella germanica	6973
tr|A0A1E1XEU3|A0A1E1XEU3_9ACAR	A0A1E1XEU3	HS	Pseudo	138		NA	1	0	p20[109:246]	360	No	No	Amblyomma aureolatum	Arthropoda	Eukaryota	Metazoa	Arthropoda	Arachnida	Ixodida	Ixodidae	Amblyomma	Amblyomma aureolatum	187763
tr|A0A1E1XF59|A0A1E1XF59_9ACAR	A0A1E1XF59	HC	True	136		NA	1	0	p20[117:251]	371	No	No	Amblyomma aureolatum	Arthropoda	Eukaryota	Metazoa	Arthropoda	Arachnida	Ixodida	Ixodidae	Amblyomma	Amblyomma aureolatum	187763
tr|A0A2P8ZK01|A0A2P8ZK01_BLAGE	A0A2P8ZK01	HC	True	139		NA	1	0	p20[53:191]	292	No	No	Blattella germanica	Arthropoda	Eukaryota	Metazoa	Arthropoda	Insecta	Blattodea	Ectobiidae	Blattella	Blattella germanica	6973
tr|A0A2P8XYY9|A0A2P8XYY9_BLAGE	A0A2P8XYY9	HY	Pseudo	138		NA	1	0	p20[185:322]	348	No	No	Blattella germanica	Arthropoda	Eukaryota	Metazoa	Arthropoda	Insecta	Blattodea	Ectobiidae	Blattella	Blattella germanica	6973
tr|A0A016WPL8|A0A016WPL8_9BILA	A0A016WPL8	HC	True	124		NA	1	0	p20[118:241]	500	No	No	Ancylostoma ceylanicum	Nematoda	Eukaryota	Metazoa	Nematoda	Chromadorea	Rhabditida	Ancylostomatidae	Ancylostoma	Ancylostoma ceylanicum	53326
tr|A0A2P8Y7D3|A0A2P8Y7D3_BLAGE	A0A2P8Y7D3	HC	True	148		NA	1	0	p20[207:354]	480	No	No	Blattella germanica	Arthropoda	Eukaryota	Metazoa	Arthropoda	Insecta	Blattodea	Ectobiidae	Blattella	Blattella germanica	6973
tr|A0A2P8XYZ2|A0A2P8XYZ2_BLAGE	A0A2P8XYZ2	HC	True	105		NA	1	0	p20[33:137]	206	No	No	Blattella germanica	Arthropoda	Eukaryota	Metazoa	Arthropoda	Insecta	Blattodea	Ectobiidae	Blattella	Blattella germanica	6973
tr|A0A146KUS3|A0A146KUS3_BLAGE	A0A146KUS3	HC	True	143		NA	1	0	p20[144:286]	340	No	No	Blattella germanica	Arthropoda	Eukaryota	Metazoa	Arthropoda	Insecta	Blattodea	Ectobiidae	Blattella	Blattella germanica	6973
tr|A0A1B6EA82|A0A1B6EA82_9HEMI	A0A1B6EA82	HC	True	123		NA	1	0	p20[1:122]	309	No	No	Clastoptera arizonana	Arthropoda	Eukaryota	Metazoa	Arthropoda	Insecta	Hemiptera	Clastopteridae	Clastoptera	Clastoptera arizonana	38151
tr|A0A0J9V1G4|A0A0J9V1G4_PLAVI	A0A0J9V1G4	HC	True	154		NA	1	0	p20[286:439]	593	No	No	Plasmodium vivax India VII	Apicomplexa	Eukaryota	NA	Apicomplexa	Aconoidasida	Haemosporida	Plasmodiidae	Plasmodium	Plasmodium vivax	1077284
tr|A0A1B6E173|A0A1B6E173_9HEMI	A0A1B6E173	HC	True	123		NA	1	0	p20[1:123]	258	No	No	Clastoptera arizonana	Arthropoda	Eukaryota	Metazoa	Arthropoda	Insecta	Hemiptera	Clastopteridae	Clastoptera	Clastoptera arizonana	38151
tr|A0A1E1XD60|A0A1E1XD60_9ACAR	A0A1E1XD60	HC	True	138		NA	1	0	p20[140:277]	501	No	Yes	Amblyomma aureolatum	Arthropoda	Eukaryota	Metazoa	Arthropoda	Arachnida	Ixodida	Ixodidae	Amblyomma	Amblyomma aureolatum	187763
tr|A0A2P8ZNL1|A0A2P8ZNL1_BLAGE	A0A2P8ZNL1	HC	True	123		NA	1	0	p20[296:418]	592	No	Yes	Blattella germanica	Arthropoda	Eukaryota	Metazoa	Arthropoda	Insecta	Blattodea	Ectobiidae	Blattella	Blattella germanica	6973
tr|A0A0J9UZK3|A0A0J9UZK3_PLAVI	A0A0J9UZK3	YT	Pseudo	138		NA	1	0	p20[1449:1586]	1925	No	No	Plasmodium vivax India VII	Apicomplexa	Eukaryota	NA	Apicomplexa	Aconoidasida	Haemosporida	Plasmodiidae	Plasmodium	Plasmodium vivax	1077284
tr|A0A1B6DQB2|A0A1B6DQB2_9HEMI	A0A1B6DQB2	HC	True	123		NA	1	0	p20[1:123]	233	No	No	Clastoptera arizonana	Arthropoda	Eukaryota	Metazoa	Arthropoda	Insecta	Hemiptera	Clastopteridae	Clastoptera	Clastoptera arizonana	38151
tr|A0A1B6E244|A0A1B6E244_9HEMI	A0A1B6E244	HC	True	122		NA	1	0	p20[1:122]	361	No	No	Clastoptera arizonana	Arthropoda	Eukaryota	Metazoa	Arthropoda	Insecta	Hemiptera	Clastopteridae	Clastoptera	Clastoptera arizonana	38151
tr|G0Y252|G0Y252_GALME	G0Y252	HC	True	133		NA	1	0	p20[112:244]	361	No	No	Galleria mellonella	Arthropoda	Eukaryota	Metazoa	Arthropoda	Insecta	Lepidoptera	Pyralidae	Galleria	Galleria mellonella	7137
tr|A0A182I5M7|A0A182I5M7_ANOAR	A0A182I5M7	HC	True	132		NA	2	0	p20[100:232]-p20[306:427]	495	No	No	Anopheles arabiensis	Arthropoda	Eukaryota	Metazoa	Arthropoda	Insecta	Diptera	Culicidae	Anopheles	Anopheles arabiensis	7173
tr|A0A182HXI0|A0A182HXI0_ANOAR	A0A182HXI0	HC	True	147		NA	1	0	p20[183:329]	430	No	No	Anopheles arabiensis	Arthropoda	Eukaryota	Metazoa	Arthropoda	Insecta	Diptera	Culicidae	Anopheles	Anopheles arabiensis	7173
tr|G0XQF7|G0XQF7_GALME	G0XQF7	HC	True	123		NA	1	0	p20[75:197]	291	No	No	Galleria mellonella	Arthropoda	Eukaryota	Metazoa	Arthropoda	Insecta	Lepidoptera	Pyralidae	Galleria	Galleria mellonella	7137
tr|A0A2M4AQU3|A0A2M4AQU3_9DIPT	A0A2M4AQU3	HC	True	150		NA	1	0	p20[192:341]	454	No	No	Anopheles triannulatus	Arthropoda	Eukaryota	Metazoa	Arthropoda	Insecta	Diptera	Culicidae	Anopheles	Anopheles triannulatus	58253
tr|B2FWR2|B2FWR2_ANOAR	B2FWR2	HC	True	127		NA	1	0	p20[1:126]	164	No	No	Anopheles arabiensis	Arthropoda	Eukaryota	Metazoa	Arthropoda	Insecta	Diptera	Culicidae	Anopheles	Anopheles arabiensis	7173
tr|A0A2A2LL26|A0A2A2LL26_9BILA	A0A2A2LL26	HC	True	137		NA	1	0	p20[248:383]	454	No	No	Diploscapter pachys	Nematoda	Eukaryota	Metazoa	Nematoda	Chromadorea	Rhabditida	Rhabditidae	Diploscapter	Diploscapter pachys	2018661
tr|Q8IDF3|Q8IDF3_PLAF7	Q8IDF3	HC	True	163		NA	1	0	p20[318:476]	613	No	No	Plasmodium falciparum 3D7	Apicomplexa	Eukaryota	NA	Apicomplexa	Aconoidasida	Haemosporida	Plasmodiidae	Plasmodium	Plasmodium falciparum	36329
tr|A0A2A2LM75|A0A2A2LM75_9BILA	A0A2A2LM75	HC	True	140		NA	1	0	p20[66:205]	227	No	No	Diploscapter pachys	Nematoda	Eukaryota	Metazoa	Nematoda	Chromadorea	Rhabditida	Rhabditidae	Diploscapter	Diploscapter pachys	2018661
tr|A0A2A2KG09|A0A2A2KG09_9BILA	A0A2A2KG09	HC	True	131		NA	1	0	p20[489:619]	860	No	No	Diploscapter pachys	Nematoda	Eukaryota	Metazoa	Nematoda	Chromadorea	Rhabditida	Rhabditidae	Diploscapter	Diploscapter pachys	2018661
tr|A0A2A2KFY3|A0A2A2KFY3_9BILA	A0A2A2KFY3	HC	True	131		NA	1	0	p20[463:593]	834	No	No	Diploscapter pachys	Nematoda	Eukaryota	Metazoa	Nematoda	Chromadorea	Rhabditida	Rhabditidae	Diploscapter	Diploscapter pachys	2018661
tr|A0A1B0A6V4|A0A1B0A6V4_GLOPL	A0A1B0A6V4	HC	True	138		NA	1	0	p20[215:351]	451	No	No	Glossina pallidipes	Arthropoda	Eukaryota	Metazoa	Arthropoda	Insecta	Diptera	Glossinidae	Glossina	Glossina pallidipes	7398
tr|A0A2A2KSR3|A0A2A2KSR3_9BILA	A0A2A2KSR3	HC	True	124		NA	1	0	p20[253:376]	615	No	No	Diploscapter pachys	Nematoda	Eukaryota	Metazoa	Nematoda	Chromadorea	Rhabditida	Rhabditidae	Diploscapter	Diploscapter pachys	2018661
tr|A0A2A2JZ09|A0A2A2JZ09_9BILA	A0A2A2JZ09	HC	True	165		NA	1	0	p20[65:227]	739	No	No	Diploscapter pachys	Nematoda	Eukaryota	Metazoa	Nematoda	Chromadorea	Rhabditida	Rhabditidae	Diploscapter	Diploscapter pachys	2018661
tr|A0A0R3U8E7|A0A0R3U8E7_9CEST	A0A0R3U8E7	HC	True	138		NA	1	0	p20[240:377]	707	No	No	Mesocestoides corti	Platyhelminthes	Eukaryota	Metazoa	Platyhelminthes	Cestoda	Cyclophyllidea	Mesocestoididae	Mesocestoides	Mesocestoides corti	53468
tr|A0A2A2LKZ0|A0A2A2LKZ0_9BILA	A0A2A2LKZ0	HC	True	145		NA	1	0	p20[248:391]	563	No	No	Diploscapter pachys	Nematoda	Eukaryota	Metazoa	Nematoda	Chromadorea	Rhabditida	Rhabditidae	Diploscapter	Diploscapter pachys	2018661
tr|A0A2A2JG44|A0A2A2JG44_9BILA	A0A2A2JG44	HC	True	131		NA	1	0	p20[356:486]	558	No	No	Diploscapter pachys	Nematoda	Eukaryota	Metazoa	Nematoda	Chromadorea	Rhabditida	Rhabditidae	Diploscapter	Diploscapter pachys	2018661
tr|A0A2A2KSQ4|A0A2A2KSQ4_9BILA	A0A2A2KSQ4	HC	True	124		NA	1	0	p20[253:376]	637	No	No	Diploscapter pachys	Nematoda	Eukaryota	Metazoa	Nematoda	Chromadorea	Rhabditida	Rhabditidae	Diploscapter	Diploscapter pachys	2018661
tr|A0A2A2LL76|A0A2A2LL76_9BILA	A0A2A2LL76	HC	True	187		NA	1	0	p20[208:387]	583	No	No	Diploscapter pachys	Nematoda	Eukaryota	Metazoa	Nematoda	Chromadorea	Rhabditida	Rhabditidae	Diploscapter	Diploscapter pachys	2018661
tr|A0A2A2JCN5|A0A2A2JCN5_9BILA	A0A2A2JCN5	HC	True	124		NA	1	0	p20[252:375]	636	No	No	Diploscapter pachys	Nematoda	Eukaryota	Metazoa	Nematoda	Chromadorea	Rhabditida	Rhabditidae	Diploscapter	Diploscapter pachys	2018661
tr|A0A2A2L2X5|A0A2A2L2X5_9BILA	A0A2A2L2X5	HC	True	172		NA	1	0	p20[87:257]	306	No	No	Diploscapter pachys	Nematoda	Eukaryota	Metazoa	Nematoda	Chromadorea	Rhabditida	Rhabditidae	Diploscapter	Diploscapter pachys	2018661
tr|A0A177ASX9|A0A177ASX9_9METZ	A0A177ASX9	HC	True	123		NA	1	0	p20[131:253]	317	No	No	Intoshia linei	Orthonectida	Eukaryota	Metazoa	Orthonectida	NA	NA	Rhopaluridae	Intoshia	Intoshia linei	1819745
tr|A0A2A2KUM2|A0A2A2KUM2_9BILA	A0A2A2KUM2	HC	True	152		NA	1	0	p20[158:303]	505	No	No	Diploscapter pachys	Nematoda	Eukaryota	Metazoa	Nematoda	Chromadorea	Rhabditida	Rhabditidae	Diploscapter	Diploscapter pachys	2018661
tr|A0A2A2KG21|A0A2A2KG21_9BILA	A0A2A2KG21	HC	True	131		NA	1	0	p20[495:625]	866	No	No	Diploscapter pachys	Nematoda	Eukaryota	Metazoa	Nematoda	Chromadorea	Rhabditida	Rhabditidae	Diploscapter	Diploscapter pachys	2018661
tr|A0A077XG43|A0A077XG43_PLABA	A0A077XG43	HP	Pseudo	149		NA	1	0	p20[325:473]	595	No	No	Plasmodium berghei ANKA	Apicomplexa	Eukaryota	NA	Apicomplexa	Aconoidasida	Haemosporida	Plasmodiidae	Plasmodium	Plasmodium berghei	5823
tr|A0A077XJN4|A0A077XJN4_PLABA	A0A077XJN4	YT	Pseudo	137		NA	1	0	p20[1255:1390]	1730	No	No	Plasmodium berghei ANKA	Apicomplexa	Eukaryota	NA	Apicomplexa	Aconoidasida	Haemosporida	Plasmodiidae	Plasmodium	Plasmodium berghei	5823
tr|W2TT09|W2TT09_NECAM	W2TT09	HC	True	124		NA	1	0	p20[55:178]	437	No	No	Necator americanus	Nematoda	Eukaryota	Metazoa	Nematoda	Chromadorea	Rhabditida	Ancylostomatidae	Necator	Necator americanus	51031
tr|A0A182TF79|A0A182TF79_9DIPT	A0A182TF79	HC	True	110		NA	1	0	p20[279:388]	445	No	No	Anopheles melas	Arthropoda	Eukaryota	Metazoa	Arthropoda	Insecta	Diptera	Culicidae	Anopheles	Anopheles melas	34690
tr|A0A1S0UIL3|A0A1S0UIL3_LOALO	A0A1S0UIL3	HC	True	126		NA	1	0	p20[167:292]	547	No	No	Loa loa	Nematoda	Eukaryota	Metazoa	Nematoda	Chromadorea	Rhabditida	Onchocercidae	Loa	Loa loa	7209
tr|A0A182WEH0|A0A182WEH0_9DIPT	A0A182WEH0	HC	True	113		NA	1	0	p20[287:399]	813	No	No	Anopheles minimus	Arthropoda	Eukaryota	Metazoa	Arthropoda	Insecta	Diptera	Culicidae	Anopheles	Anopheles minimus	112268
tr|A7M858|A7M858_SUBDO	A7M858	HC	True	163		NA	1	0	p20[19:181]	477	No	No	Suberites domuncula	Porifera	Eukaryota	Metazoa	Porifera	Demospongiae	Suberitida	Suberitidae	Suberites	Suberites domuncula	55567
tr|A0A182WCK7|A0A182WCK7_9DIPT	A0A182WCK7	HC	True	153		NA	1	0	p20[184:336]	430	No	No	Anopheles minimus	Arthropoda	Eukaryota	Metazoa	Arthropoda	Insecta	Diptera	Culicidae	Anopheles	Anopheles minimus	112268
[truncated: 19,803 more rows]
